# Supplementary material for: Is Five Percent Too Small? Analysis of the Overlaps between Disorder, Coiled Coil and Collagen Predictions in Complete Proteomes
Source: Proteomes. 2014 Feb 7;2(1):72–83. doi: 10.3390/proteomes2010072 (PMC5302728; doi:10.3390/proteomes2010072)
Supplement: Supplementary File 1 [file proteomes-02-00072-s001.xls]

## Sheet: Explanation
General table		Prediction tables (tab name shows the predictor pairs used)
ORG	Organism mnemonic (UniProt)	ORG	Organism mnemonic (UniProt)
TAXGRP	Taxonomic group assigned for the study	ALLRES	All residues in proteome
SEQCOUNT	Number of sequences in proteome	IDP_RES	All predicted disordered residues in proteome
SEQCOUNT_40	Number of sequences in the 40% filtered proteome	CC_RES	All predicted coiled coil residues in proteome
SOV_IDP	SOV statistics for IDP segments, SOV(+) and SOV(-) combined	CLG_RES	All predicted collagen residues in proteome
SOV_IDP_P	SOV(+) statistics for IDP segments (for segments predicted to be disordered)	PURE_IDP_RES	Residues exclusively predicted to be in disordered segments
SOV_IDP_M	SOV(-) statistics for IDP segments (for segments predicted not to be disordered)	PURE_CC_RES	Residues exclusively predicted to be in coiled coil segments
SOV_CC	SOV statistics for coiled coil segments, SOV(+) and SOV(-) combined	PURE_CLG_RES	Residues exclusively predicted to be in collagen segments
SOV_CC_P	SOV(+) statistics for coiled coil segments (for segments predicted to form coiled coils)	CC_IDP	Residues predicted to be both in disordered and coiled coil segments
SOV_CC_M	SOV(-) statistics for coiled coil segments (for segments predicted not to form coiled coils)	CLG_IDP	Residues predicted to be both in disordered and collagen segments
SOV_IDP_40	SOV_IDP calculated for the 40% filtered proteome	CC_CLG	Residues predicted to be both in collagen and coiled coil segments
SOV_IDP_P_40	SOV_IDP_P calculated for the 40% filtered proteome	RES_PERSEQ	Average number of residues per sequence (average sequence length)
SOV_IDP_M_40	SOV_IDP_M calculated for the 40% filtered proteome	IDP_PERSEQ	Average number of all disordered residues per sequence
SOV_CC_40	SOV_CC calculated for the 40% filtered proteome	CC_PERSEQ	Average number of all coiled coil residues per sequence
SOV_CC_P_40	SOV_CC_P calculated for the 40% filtered proteome	CLG_PERSEQ	Average number of all collagen residues per sequence
SOV_CC_M_40	SOV_CC_M calculated for the 40% filtered proteome	IDP_PER_LEN_PERSEQ	Average fraction of disordered residues per sequence
		CC_PER_LEN_PERSEQ	Average fraction of coiled coil residues per sequence
		CLG_PER_LEN_PERSEQ	Average fraction of collagen residues per sequence
		CC_IDP_PERSEQ	Average fraction of residues predicted to be both disordered and in coiled coil per sequence
		CLG_IDP_PERSEQ	Average fraction of residues predicted to be both disosordered and in collagen segments per sequence
		CLG_CC_PERSEQ	Average fraction of residues predicted to be both in collagen coiled coil segments per sequence
		CCIDP_PER_IDP_PERSEQ	Average fraction of residues predicted to be in coiled coils within IDP segments per sequence
		CLGIDP_PER_IDP_PERSEQ	Average fraction of residues predicted to be in collagen segments within IDP segments per sequence
		CCIDP_PER_CC_PERSEQ	Average fraction of residues predicted to be disordered within coiled coil segments per sequence
		IDP_SEG	Number of disordered segments (>=30 residues)
		IDP_SEGSQ	Number of sequences with disordered segments (>=30 residues)
		CC_SEG	Number of coiled coil segments (>= 30 residues)
		CC_SEGSQ	Number of sequences with coiled coil segments (>= 30 residues)
		PURE_IDP_SEG	Number of segments exclusively predicted to be disorded (>=30 residues)
		PURE_IDP_SEGSQ	Number of seqeunces with segments exclusively predicted to be disorded (>=30 residues)
		PURE_CC_SEG	Number of segments exclusively predicted to be in coiled coil state (>=30 residues)
		PURE_CC_SEGSQ	Number of sequences with segments exclusively predicted to be in coiled coil state (>=30 residues)
		ALLRES_40	ALLRES calculated for the 40% filtered proteomes
		IDP_RES_40	IDP_RES calculated for the 40% filtered proteomes
		CC_RES_40	CC_RES calculated for the 40% filtered proteomes
		CLG_RES_40	CLG_RES calculated for the 40% filtered proteomes
		PURE_IDP_RES_40	PURE_IDP_RES calculated for the 40% filtered proteomes
		PURE_CC_RES_40	PURE_CC_RES calculated for the 40% filtered proteomes
		PURE_CLG_RES_40	PURE_CLG_RES calculated for the 40% filtered proteomes
		CC_IDP_40	CC_IDP calculated for the 40% filtered proteomes
		CLG_IDP_40	CLG_IDP calculated for the 40% filtered proteomes
		CC_CLG_40	CC_CLG calculated for the 40% filtered proteomes
		RES_PERSEQ_40	RES_PERSEQ calculated for the 40% filtered proteomes
		IDP_PERSEQ_40	IDP_PERSEQ calculated for the 40% filtered proteomes
		CC_PERSEQ_40	CC_PERSEQ calculated for the 40% filtered proteomes
		CLG_PERSEQ_40	CLG_PERSEQ calculated for the 40% filtered proteomes
		IDP_PER_LEN_PERSEQ_40	IDP_PER_LEN_PERSEQ calculated for the 40% filtered proteomes
		CC_PER_LEN_PERSEQ_40	CC_PER_LEN_PERSEQ calculated for the 40% filtered proteomes
		CLG_PER_LEN_PERSEQ_40	CLG_PER_LEN_PERSEQ calculated for the 40% filtered proteomes
		CC_IDP_PERSEQ_40	CC_IDP_PERSEQ calculated for the 40% filtered proteomes
		CLG_IDP_PERSEQ_40	CLG_IDP_PERSEQ calculated for the 40% filtered proteomes
		CLG_CC_PERSEQ_40	CLG_CC_PERSEQ calculated for the 40% filtered proteomes
		CCIDP_PER_IDP_PERSEQ_40	CCIDP_PER_IDP_PERSEQ calculated for the 40% filtered proteomes
		CLGIDP_PER_IDP_PERSEQ_40	CLGIDP_PER_IDP_PERSEQ calculated for the 40% filtered proteomes
		CCIDP_PER_CC_PERSEQ_40	CCIDP_PER_CC_PERSEQ calculated for the 40% filtered proteomes
		IDP_SEG_40	IDP_SEG calculated for the 40% filtered proteomes
		IDP_SEGSQ_40	IDP_SEGSQ calculated for the 40% filtered proteomes
		CC_SEG_40	CC_SEG calculated for the 40% filtered proteomes
		CC_SEGSQ_40	CC_SEGSQ calculated for the 40% filtered proteomes
		PURE_IDP_SEG_40	PURE_IDP_SEG calculated for the 40% filtered proteomes
		PURE_IDP_SEGSQ_40	PURE_IDP_SEGSQ calculated for the 40% filtered proteomes
		PURE_CC_SEG_40	PURE_CC_SEG calculated for the 40% filtered proteomes
		PURE_CC_SEGSQ_40	PURE_CC_SEGSQ calculated for the 40% filtered proteomes
ORG
TAXGRP
SEQCOUNT
SEQCOUNT_40
SOV_IDP
SOV_IDP_P
SOV_IDP_M
SOV_CC
SOV_CC_P
SOV_CC_M
SOV_IDP_40
SOV_IDP_P_40
SOV_IDP_M_40
SOV_CC_40
SOV_CC_P_40
SOV_CC_M_40
ORG
TAXGRP
SEQCOUNT
SEQCOUNT_40
SOV_IDP
SOV_IDP_P
SOV_IDP_M
SOV_CC
SOV_CC_P
SOV_CC_M
SOV_IDP_40
SOV_IDP_P_40
SOV_IDP_M_40
SOV_CC_40
SOV_CC_P_40
SOV_CC_M_40
ORG
TAXGRP
SEQCOUNT
SEQCOUNT_40
SOV_IDP
SOV_IDP_P
SOV_IDP_M
SOV_CC
SOV_CC_P
SOV_CC_M
SOV_IDP_40
SOV_IDP_P_40
SOV_IDP_M_40
SOV_CC_40
SOV_CC_P_40
SOV_CC_M_40
ORG
TAXGRP
SEQCOUNT
SEQCOUNT_40
SOV_IDP
SOV_IDP_P
SOV_IDP_M
SOV_CC
SOV_CC_P
SOV_CC_M
SOV_IDP_40
SOV_IDP_P_40
SOV_IDP_M_40
SOV_CC_40
SOV_CC_P_40
SOV_CC_M_40
ORG
TAXGRP
SEQCOUNT
SEQCOUNT_40
SOV_IDP
SOV_IDP_P
SOV_IDP_M
SOV_CC
SOV_CC_P
SOV_CC_M
SOV_IDP_40
SOV_IDP_P_40
SOV_IDP_M_40
SOV_CC_40
SOV_CC_P_40
SOV_CC_M_40
ORG
TAXGRP
SEQCOUNT
SEQCOUNT_40
SOV_IDP
SOV_IDP_P
SOV_IDP_M
SOV_CC
SOV_CC_P
SOV_CC_M
SOV_IDP_40
SOV_IDP_P_40
SOV_IDP_M_40
SOV_CC_40
SOV_CC_P_40
SOV_CC_M_40
ORG
TAXGRP
SEQCOUNT
SEQCOUNT_40
SOV_IDP
SOV_IDP_P
SOV_IDP_M
SOV_CC
SOV_CC_P
SOV_CC_M
SOV_IDP_40
SOV_IDP_P_40
SOV_IDP_M_40
SOV_CC_40
SOV_CC_P_40
SOV_CC_M_40
ORG
TAXGRP
SEQCOUNT
SEQCOUNT_40
SOV_IDP
SOV_IDP_P
SOV_IDP_M
SOV_CC
SOV_CC_P
SOV_CC_M
SOV_IDP_40
SOV_IDP_P_40
SOV_IDP_M_40
SOV_CC_40
SOV_CC_P_40
SOV_CC_M_40
ORG
TAXGRP
SEQCOUNT
SEQCOUNT_40
SOV_IDP
SOV_IDP_P
SOV_IDP_M
SOV_CC
SOV_CC_P
SOV_CC_M
SOV_IDP_40
SOV_IDP_P_40
SOV_IDP_M_40
SOV_CC_40
SOV_CC_P_40
SOV_CC_M_40
ORG
TAXGRP
SEQCOUNT
SEQCOUNT_40
SOV_IDP
SOV_IDP_P
SOV_IDP_M
SOV_CC
SOV_CC_P
SOV_CC_M
SOV_IDP_40
SOV_IDP_P_40
SOV_IDP_M_40
SOV_CC_40
SOV_CC_P_40
SOV_CC_M_40
ORG
TAXGRP
SEQCOUNT
SEQCOUNT_40
SOV_IDP
SOV_IDP_P
SOV_IDP_M
SOV_CC
SOV_CC_P
SOV_CC_M
SOV_IDP_40
SOV_IDP_P_40
SOV_IDP_M_40
SOV_CC_40
SOV_CC_P_40
SOV_CC_M_40
ORG
TAXGRP
SEQCOUNT
SEQCOUNT_40
SOV_IDP
SOV_IDP_P
SOV_IDP_M
SOV_CC
SOV_CC_P
SOV_CC_M
SOV_IDP_40
SOV_IDP_P_40
SOV_IDP_M_40
SOV_CC_40
SOV_CC_P_40
SOV_CC_M_40
ORG
TAXGRP
SEQCOUNT
SEQCOUNT_40
SOV_IDP
SOV_IDP_P
SOV_IDP_M
SOV_CC
SOV_CC_P
SOV_CC_M
SOV_IDP_40
SOV_IDP_P_40
SOV_IDP_M_40
SOV_CC_40
SOV_CC_P_40
SOV_CC_M_40
ORG
TAXGRP
SEQCOUNT
SEQCOUNT_40
SOV_IDP
SOV_IDP_P
SOV_IDP_M
SOV_CC
SOV_CC_P
SOV_CC_M
SOV_IDP_40
SOV_IDP_P_40
SOV_IDP_M_40
SOV_CC_40
SOV_CC_P_40
SOV_CC_M_40
ORG
TAXGRP
SEQCOUNT
SEQCOUNT_40
SOV_IDP
SOV_IDP_P
SOV_IDP_M
SOV_CC
SOV_CC_P
SOV_CC_M
SOV_IDP_40
SOV_IDP_P_40
SOV_IDP_M_40
SOV_CC_40
SOV_CC_P_40
SOV_CC_M_40
ORG
TAXGRP
SEQCOUNT
SEQCOUNT_40
SOV_IDP
SOV_IDP_P
SOV_IDP_M
SOV_CC
SOV_CC_P
SOV_CC_M
SOV_IDP_40
SOV_IDP_P_40
SOV_IDP_M_40
SOV_CC_40
SOV_CC_P_40
SOV_CC_M_40
ORG
TAXGRP
SEQCOUNT
SEQCOUNT_40
SOV_IDP
SOV_IDP_P
SOV_IDP_M
SOV_CC
SOV_CC_P
SOV_CC_M
SOV_IDP_40
SOV_IDP_P_40
SOV_IDP_M_40
SOV_CC_40
SOV_CC_P_40
SOV_CC_M_40
ORG
TAXGRP
SEQCOUNT
SEQCOUNT_40
SOV_IDP
SOV_IDP_P
SOV_IDP_M
SOV_CC
SOV_CC_P
SOV_CC_M
SOV_IDP_40
SOV_IDP_P_40
SOV_IDP_M_40
SOV_CC_40
SOV_CC_P_40
SOV_CC_M_40
ORG
TAXGRP
SEQCOUNT
SEQCOUNT_40
SOV_IDP
SOV_IDP_P
SOV_IDP_M
SOV_CC
SOV_CC_P
SOV_CC_M
SOV_IDP_40
SOV_IDP_P_40
SOV_IDP_M_40
SOV_CC_40
SOV_CC_P_40
SOV_CC_M_40
ORG
TAXGRP
SEQCOUNT
SEQCOUNT_40
SOV_IDP
SOV_IDP_P
SOV_IDP_M
SOV_CC
SOV_CC_P
SOV_CC_M
SOV_IDP_40
SOV_IDP_P_40
SOV_IDP_M_40
SOV_CC_40
SOV_CC_P_40
SOV_CC_M_40
ORG
TAXGRP
SEQCOUNT
SEQCOUNT_40
SOV_IDP
SOV_IDP_P
SOV_IDP_M
SOV_CC
SOV_CC_P
SOV_CC_M
SOV_IDP_40
SOV_IDP_P_40
SOV_IDP_M_40
SOV_CC_40
SOV_CC_P_40
SOV_CC_M_40
ORG
TAXGRP
SEQCOUNT
SEQCOUNT_40
SOV_IDP
SOV_IDP_P
SOV_IDP_M
SOV_CC
SOV_CC_P
SOV_CC_M
SOV_IDP_40
SOV_IDP_P_40
SOV_IDP_M_40
SOV_CC_40
SOV_CC_P_40
SOV_CC_M_40
ORG
TAXGRP
SEQCOUNT
SEQCOUNT_40
SOV_IDP
SOV_IDP_P
SOV_IDP_M
SOV_CC
SOV_CC_P
SOV_CC_M
SOV_IDP_40
SOV_IDP_P_40
SOV_IDP_M_40
SOV_CC_40
SOV_CC_P_40
SOV_CC_M_40
ORG
TAXGRP
SEQCOUNT
SEQCOUNT_40
SOV_IDP
SOV_IDP_P
SOV_IDP_M
SOV_CC
SOV_CC_P
SOV_CC_M
SOV_IDP_40
SOV_IDP_P_40
SOV_IDP_M_40
SOV_CC_40
SOV_CC_P_40
SOV_CC_M_40
ORG
TAXGRP
SEQCOUNT
SEQCOUNT_40
SOV_IDP
SOV_IDP_P
SOV_IDP_M
SOV_CC
SOV_CC_P
SOV_CC_M
SOV_IDP_40
SOV_IDP_P_40
SOV_IDP_M_40
SOV_CC_40
SOV_CC_P_40
SOV_CC_M_40
ORG
TAXGRP
SEQCOUNT
SEQCOUNT_40
SOV_IDP
SOV_IDP_P
SOV_IDP_M
SOV_CC
SOV_CC_P
SOV_CC_M
SOV_IDP_40
SOV_IDP_P_40
SOV_IDP_M_40
SOV_CC_40
SOV_CC_P_40
SOV_CC_M_40
ORG
TAXGRP
SEQCOUNT
SEQCOUNT_40
SOV_IDP
SOV_IDP_P
SOV_IDP_M
SOV_CC
SOV_CC_P
SOV_CC_M
SOV_IDP_40
SOV_IDP_P_40
SOV_IDP_M_40
SOV_CC_40
SOV_CC_P_40
SOV_CC_M_40
ORG
TAXGRP
SEQCOUNT
SEQCOUNT_40
SOV_IDP
SOV_IDP_P
SOV_IDP_M
SOV_CC
SOV_CC_P
SOV_CC_M
SOV_IDP_40
SOV_IDP_P_40
SOV_IDP_M_40
SOV_CC_40
SOV_CC_P_40
SOV_CC_M_40
ORG
TAXGRP
SEQCOUNT
SEQCOUNT_40
SOV_IDP
SOV_IDP_P
SOV_IDP_M
SOV_CC
SOV_CC_P
SOV_CC_M
SOV_IDP_40
SOV_IDP_P_40
SOV_IDP_M_40
SOV_CC_40
SOV_CC_P_40
SOV_CC_M_40
ORG
TAXGRP
SEQCOUNT
SEQCOUNT_40
SOV_IDP
SOV_IDP_P
SOV_IDP_M
SOV_CC
SOV_CC_P
SOV_CC_M
SOV_IDP_40
SOV_IDP_P_40
SOV_IDP_M_40
SOV_CC_40
SOV_CC_P_40
SOV_CC_M_40
ORG
TAXGRP
SEQCOUNT
SEQCOUNT_40
SOV_IDP
SOV_IDP_P
SOV_IDP_M
SOV_CC
SOV_CC_P
SOV_CC_M
SOV_IDP_40
SOV_IDP_P_40
SOV_IDP_M_40
SOV_CC_40
SOV_CC_P_40
SOV_CC_M_40
ORG
TAXGRP
SEQCOUNT
SEQCOUNT_40
SOV_IDP
SOV_IDP_P
SOV_IDP_M
SOV_CC
SOV_CC_P
SOV_CC_M
SOV_IDP_40
SOV_IDP_P_40
SOV_IDP_M_40
SOV_CC_40
SOV_CC_P_40
SOV_CC_M_40
ORG
TAXGRP
SEQCOUNT
SEQCOUNT_40
SOV_IDP
SOV_IDP_P
SOV_IDP_M
SOV_CC
SOV_CC_P
SOV_CC_M
SOV_IDP_40
SOV_IDP_P_40
SOV_IDP_M_40
SOV_CC_40
SOV_CC_P_40
SOV_CC_M_40
ORG
TAXGRP
SEQCOUNT
SEQCOUNT_40
SOV_IDP
SOV_IDP_P
SOV_IDP_M
SOV_CC
SOV_CC_P
SOV_CC_M
SOV_IDP_40
SOV_IDP_P_40
SOV_IDP_M_40
SOV_CC_40
SOV_CC_P_40
SOV_CC_M_40
ORG
TAXGRP
SEQCOUNT
SEQCOUNT_40
SOV_IDP
SOV_IDP_P
SOV_IDP_M
SOV_CC
SOV_CC_P
SOV_CC_M
SOV_IDP_40
SOV_IDP_P_40
SOV_IDP_M_40
SOV_CC_40
SOV_CC_P_40
SOV_CC_M_40
ORG
TAXGRP
SEQCOUNT
SEQCOUNT_40
SOV_IDP
SOV_IDP_P
SOV_IDP_M
SOV_CC
SOV_CC_P
SOV_CC_M
SOV_IDP_40
SOV_IDP_P_40
SOV_IDP_M_40
SOV_CC_40
SOV_CC_P_40
SOV_CC_M_40
ORG
TAXGRP
SEQCOUNT
SEQCOUNT_40
SOV_IDP
SOV_IDP_P
SOV_IDP_M
SOV_CC
SOV_CC_P
SOV_CC_M
SOV_IDP_40
SOV_IDP_P_40
SOV_IDP_M_40
SOV_CC_40
SOV_CC_P_40
SOV_CC_M_40
ORG
TAXGRP
SEQCOUNT
SEQCOUNT_40
SOV_IDP
SOV_IDP_P
SOV_IDP_M
SOV_CC
SOV_CC_P
SOV_CC_M
SOV_IDP_40
SOV_IDP_P_40
SOV_IDP_M_40
SOV_CC_40
SOV_CC_P_40
SOV_CC_M_40
ORG
TAXGRP
SEQCOUNT
SEQCOUNT_40
SOV_IDP
SOV_IDP_P
SOV_IDP_M
SOV_CC
SOV_CC_P
SOV_CC_M
SOV_IDP_40
SOV_IDP_P_40
SOV_IDP_M_40
SOV_CC_40
SOV_CC_P_40
SOV_CC_M_40
ORG
TAXGRP
SEQCOUNT
SEQCOUNT_40
SOV_IDP
SOV_IDP_P
SOV_IDP_M
SOV_CC
SOV_CC_P
SOV_CC_M
SOV_IDP_40
SOV_IDP_P_40
SOV_IDP_M_40
SOV_CC_40
SOV_CC_P_40
SOV_CC_M_40
ORG
TAXGRP
SEQCOUNT
SEQCOUNT_40
SOV_IDP
SOV_IDP_P
SOV_IDP_M
SOV_CC
SOV_CC_P
SOV_CC_M
SOV_IDP_40
SOV_IDP_P_40
SOV_IDP_M_40
SOV_CC_40
SOV_CC_P_40
SOV_CC_M_40
ORG
TAXGRP
SEQCOUNT
SEQCOUNT_40
SOV_IDP
SOV_IDP_P
SOV_IDP_M
SOV_CC
SOV_CC_P
SOV_CC_M
SOV_IDP_40
SOV_IDP_P_40
SOV_IDP_M_40
SOV_CC_40
SOV_CC_P_40
SOV_CC_M_40
ORG
TAXGRP
SEQCOUNT
SEQCOUNT_40
SOV_IDP
SOV_IDP_P
SOV_IDP_M
SOV_CC
SOV_CC_P
SOV_CC_M
SOV_IDP_40
SOV_IDP_P_40
SOV_IDP_M_40
SOV_CC_40
SOV_CC_P_40
SOV_CC_M_40
ORG
TAXGRP
SEQCOUNT
SEQCOUNT_40
SOV_IDP
SOV_IDP_P
SOV_IDP_M
SOV_CC
SOV_CC_P
SOV_CC_M
SOV_IDP_40
SOV_IDP_P_40
SOV_IDP_M_40
SOV_CC_40
SOV_CC_P_40
SOV_CC_M_40
ORG
TAXGRP
SEQCOUNT
SEQCOUNT_40
SOV_IDP
SOV_IDP_P
SOV_IDP_M
SOV_CC
SOV_CC_P
SOV_CC_M
SOV_IDP_40
SOV_IDP_P_40
SOV_IDP_M_40
SOV_CC_40
SOV_CC_P_40
SOV_CC_M_40
ORG
TAXGRP
SEQCOUNT
SEQCOUNT_40
SOV_IDP
SOV_IDP_P
SOV_IDP_M
SOV_CC
SOV_CC_P
SOV_CC_M
SOV_IDP_40
SOV_IDP_P_40
SOV_IDP_M_40
SOV_CC_40
SOV_CC_P_40
SOV_CC_M_40
ORG
TAXGRP
SEQCOUNT
SEQCOUNT_40
SOV_IDP
SOV_IDP_P
SOV_IDP_M
SOV_CC
SOV_CC_P
SOV_CC_M
SOV_IDP_40
SOV_IDP_P_40
SOV_IDP_M_40
SOV_CC_40
SOV_CC_P_40
SOV_CC_M_40
ORG
TAXGRP
SEQCOUNT
SEQCOUNT_40
SOV_IDP
SOV_IDP_P
SOV_IDP_M
SOV_CC
SOV_CC_P
SOV_CC_M
SOV_IDP_40
SOV_IDP_P_40
SOV_IDP_M_40
SOV_CC_40
SOV_CC_P_40
SOV_CC_M_40
ORG
TAXGRP
SEQCOUNT
SEQCOUNT_40
SOV_IDP
SOV_IDP_P
SOV_IDP_M
SOV_CC
SOV_CC_P
SOV_CC_M
SOV_IDP_40
SOV_IDP_P_40
SOV_IDP_M_40
SOV_CC_40
SOV_CC_P_40
SOV_CC_M_40
ORG
TAXGRP
SEQCOUNT
SEQCOUNT_40
SOV_IDP
SOV_IDP_P
SOV_IDP_M
SOV_CC
SOV_CC_P
SOV_CC_M
SOV_IDP_40
SOV_IDP_P_40
SOV_IDP_M_40
SOV_CC_40
SOV_CC_P_40
SOV_CC_M_40
ORG
TAXGRP
SEQCOUNT
SEQCOUNT_40
SOV_IDP
SOV_IDP_P
SOV_IDP_M
SOV_CC
SOV_CC_P
SOV_CC_M
SOV_IDP_40
SOV_IDP_P_40
SOV_IDP_M_40
SOV_CC_40
SOV_CC_P_40
SOV_CC_M_40
ORG
TAXGRP
SEQCOUNT
SEQCOUNT_40
SOV_IDP
SOV_IDP_P
SOV_IDP_M
SOV_CC
SOV_CC_P
SOV_CC_M
SOV_IDP_40
SOV_IDP_P_40
SOV_IDP_M_40
SOV_CC_40
SOV_CC_P_40
SOV_CC_M_40
ORG
TAXGRP
SEQCOUNT
SEQCOUNT_40
SOV_IDP
SOV_IDP_P
SOV_IDP_M
SOV_CC
SOV_CC_P
SOV_CC_M
SOV_IDP_40
SOV_IDP_P_40
SOV_IDP_M_40
SOV_CC_40
SOV_CC_P_40
SOV_CC_M_40
ORG
TAXGRP
SEQCOUNT
SEQCOUNT_40
SOV_IDP
SOV_IDP_P
SOV_IDP_M
SOV_CC
SOV_CC_P
SOV_CC_M
SOV_IDP_40
SOV_IDP_P_40
SOV_IDP_M_40
SOV_CC_40
SOV_CC_P_40
SOV_CC_M_40
ORG
TAXGRP
SEQCOUNT
SEQCOUNT_40
SOV_IDP
SOV_IDP_P
SOV_IDP_M
SOV_CC
SOV_CC_P
SOV_CC_M
SOV_IDP_40
SOV_IDP_P_40
SOV_IDP_M_40
SOV_CC_40
SOV_CC_P_40
SOV_CC_M_40
ORG
TAXGRP
SEQCOUNT
SEQCOUNT_40
SOV_IDP
SOV_IDP_P
SOV_IDP_M
SOV_CC
SOV_CC_P
SOV_CC_M
SOV_IDP_40
SOV_IDP_P_40
SOV_IDP_M_40
SOV_CC_40
SOV_CC_P_40
SOV_CC_M_40
ORG
TAXGRP
SEQCOUNT
SEQCOUNT_40
SOV_IDP
SOV_IDP_P
SOV_IDP_M
SOV_CC
SOV_CC_P
SOV_CC_M
SOV_IDP_40
SOV_IDP_P_40
SOV_IDP_M_40
SOV_CC_40
SOV_CC_P_40
SOV_CC_M_40
ORG
TAXGRP
SEQCOUNT
SEQCOUNT_40
SOV_IDP
SOV_IDP_P
SOV_IDP_M
SOV_CC
SOV_CC_P
SOV_CC_M
SOV_IDP_40
SOV_IDP_P_40
SOV_IDP_M_40
SOV_CC_40
SOV_CC_P_40
SOV_CC_M_40
ORG
TAXGRP
SEQCOUNT
SEQCOUNT_40
SOV_IDP
SOV_IDP_P
SOV_IDP_M
SOV_CC
SOV_CC_P
SOV_CC_M
SOV_IDP_40
SOV_IDP_P_40
SOV_IDP_M_40
SOV_CC_40
SOV_CC_P_40
SOV_CC_M_40
ORG
TAXGRP
SEQCOUNT
SEQCOUNT_40
SOV_IDP
SOV_IDP_P
SOV_IDP_M
SOV_CC
SOV_CC_P
SOV_CC_M
SOV_IDP_40
SOV_IDP_P_40
SOV_IDP_M_40
SOV_CC_40
SOV_CC_P_40
SOV_CC_M_40
ORG
TAXGRP
SEQCOUNT
SEQCOUNT_40
SOV_IDP
SOV_IDP_P
SOV_IDP_M
SOV_CC
SOV_CC_P
SOV_CC_M
SOV_IDP_40
SOV_IDP_P_40
SOV_IDP_M_40
SOV_CC_40
SOV_CC_P_40
SOV_CC_M_40
ORG
TAXGRP
SEQCOUNT
SEQCOUNT_40
SOV_IDP
SOV_IDP_P
SOV_IDP_M
SOV_CC
SOV_CC_P
SOV_CC_M
SOV_IDP_40
SOV_IDP_P_40
SOV_IDP_M_40
SOV_CC_40
SOV_CC_P_40
SOV_CC_M_40
ORG
TAXGRP
SEQCOUNT
SEQCOUNT_40
SOV_IDP
SOV_IDP_P
SOV_IDP_M
SOV_CC
SOV_CC_P
SOV_CC_M
SOV_IDP_40
SOV_IDP_P_40
SOV_IDP_M_40
SOV_CC_40
SOV_CC_P_40
SOV_CC_M_40

## Sheet: General
ORG	TAXGRP	SEQCOUNT	SEQCOUNT_40	SOV_IDP	SOV_IDP_P	SOV_IDP_M	SOV_CC	SOV_CC_P	SOV_CC_M	SOV_IDP_40	SOV_IDP_P_40	SOV_IDP_M_40	SOV_CC_40	SOV_CC_P_40	SOV_CC_M_40
AADNV	Viruses	3	0	76.035	76.237	75.833	74.242	0	83.15
AAV2S	Viruses	5	0	59.928	50.359	69.496	99	NaN	100
ABLVB	Viruses	5	0	49.634	20	79.268	99	NaN	100
ABPVR	Viruses	3	0	58.841	33.333	84.349	99	NaN	100
ABVP	Viruses	54	54	88.361	20.407	95.965	93.641	0	96.542	88.361	20.407	95.965	93.641	0	96.542
ACLSP	Viruses	3	0	86.224	72.553	91.413	99	NaN	100
ADE02	Viruses	45	44	70.935	57.923	75.385	96.059	48.333	98.533	70.275	56.721	74.813	95.992	48.333	98.499
ADEF1	Viruses	23	22	64.256	20.784	84.228	87.614	0	94.272	65.138	22.17	83.978	87.097	0	94.012
ADEG1	Viruses	38	38	77.991	45.421	87.039	95.614	0	98.386	77.991	45.421	87.039	95.614	0	98.386
ADEO7	Viruses	30	27	78.8	37.819	89.334	99	NaN	100	76.518	33.378	88.544	99	NaN	100
ADVG	Viruses	4	0	66.526	50	77.403	82.54	0	91.581
AEDAE	Metazoa	16654	11822	69.029	37.74	78.842	91.534	37.948	95.867	66.919	39.184	76.575	90.447	36.72	95.266
AEVCA	Viruses	1	0	26.918	0	53.836	99	NaN	100
AFV1Y	Viruses	40	39	93.788	20	99.325	95.273	33.333	97.395	93.654	20	99.308	95.177	33.333	97.328
AFV2P	Viruses	52	52	91.808	36.588	97.426	95.197	25	98.009	91.808	36.588	97.426	95.197	25	98.009
AGRT5	Bacteria	5344	4855	81.472	16.414	91.127	96.09	35.502	98.472	81.257	17.061	91.055	96.129	36.081	98.505
AHV2H	Viruses	2	0	51.82	36.667	66.973	99	NaN	100
AILME	Metazoa	21139	13520	63.552	36.576	74.105	90.331	41.396	95.073	61.668	38.278	71.838	89.419	41.103	94.527
AJECG	Eukaryota	9214	8870	67.615	45.052	77.372	92.147	34.597	96.374	67.436	45.667	76.943	92.029	34.614	96.306
ALHV1	Viruses	70	70	82.007	40.89	91.306	96.6	69.469	98.868	82.007	40.89	91.306	96.6	69.469	98.868
AMEPV	Viruses	278	266	86.003	7.218	92.62	95.326	46.474	98.027	87.663	8.396	93.832	95.332	35.264	98.088
AMPQE	Metazoa	29741	14968	70.212	30.488	80.819	92.503	43.633	96.357	67.567	35.968	77.287	91.444	42.216	95.682
AMPV1	Viruses	9	0	68.696	39.794	84.664	84.959	0	93.696
AMVLE	Viruses	4	0	38.014	0	76.029	97.514	86.111	100
ANOCA	Metazoa	19109	12191	61.983	31.623	73.473	89.328	40.156	94.432	61.989	34.746	73.041	88.285	40.475	93.769
ANODA	Metazoa	11437	10712	66.869	46.402	75.755	90.086	34.359	95.126	66.028	47.029	74.833	89.751	34.41	94.931
ANOGA	Metazoa	13072	10309	70.189	42.113	79.422	89.872	34.448	94.879	68.668	43.292	77.87	89.165	34.363	94.49
APIME	Metazoa	10958	9239	67.366	34.075	77.494	87.429	33.907	93.369	66.022	34.278	76.176	86.739	34.05	92.991
APRVF	Viruses	9	0	71.583	29.347	90.935	89.167	35.434	94.237
AQRVC	Viruses	12	12	68.743	19.558	85.244	97.253	67.219	99.071	68.743	19.558	85.244	97.253	67.219	99.071
AQRVG	Viruses	12	12	55.556	25.572	73.469	95.035	32.573	97.522	55.556	25.572	73.469	95.035	32.573	97.522
AQUAE	Bacteria	1553	1505	78.086	2.138	89.652	89.016	28.578	94.561	78.254	2.22	89.755	89.083	28.662	94.587
ARATH	Embryophyta	31808	15322	63.265	27.623	76.895	92.028	35.892	96.277	61.624	30.316	74.55	91.508	35.678	95.978
ARCFU	Archaea	2398	2203	83.356	3.139	92.763	92.725	23.193	96.714	83.467	3.427	92.846	92.723	23.53	96.708
ASFB7	Viruses	149	136	82.567	19.932	91.175	96.039	15.48	98.509	80.996	19.932	90.326	95.756	15.48	98.366
ASGVP	Viruses	2	0	60.667	50	71.335	99	NaN	100
ASHGO	Eukaryota	4760	4588	66.466	34.502	79.185	89.731	34.828	95.065	66.227	34.909	78.792	89.581	34.612	94.992
ASPFU	Eukaryota	9649	8816	68.131	41.262	78.989	91.784	34.894	96.123	67.51	42.516	77.955	91.406	35.43	95.898
ASPVP	Viruses	5	0	84.363	50	89.926	99	NaN	100
ATV	Viruses	72	68	84.61	22.592	93.214	89.719	22.551	94.013	84.47	19.707	92.815	91.112	27.061	94.656
BABBO	Eukaryota	3687	3360	66.913	28.581	79.846	91.49	32.5	96.082	68.354	30.233	81.286	91.543	29.848	96.099
BACAN	Bacteria	5493	4888	84.794	12.831	92.114	93.201	26.896	96.931	84.881	13.526	92.188	92.999	26.509	96.832
BACCR	Bacteria	5240	4634	84.674	13.309	92.13	92.949	28.42	96.728	84.804	13.502	92.245	92.843	28.395	96.653
BACSU	Bacteria	4199	3822	80.949	13.722	90.153	92.755	28.401	96.643	80.686	13.897	89.954	92.835	29.555	96.696
BACTN	Bacteria	4782	4130	83.777	11.695	92.47	93.751	30.127	97.35	83.848	12.156	92.451	93.877	32.082	97.384
BATDJ	Eukaryota	8610	6835	66.735	32.82	77.381	92.018	39.114	96.206	65.667	32.563	76.683	91.989	37.076	96.212
BAVJK	Viruses	12	12	74.95	19.008	91.397	93.455	47.727	97.289	74.95	19.008	91.397	93.455	47.727	97.289
BAYMY	Viruses	2	0	28.334	12.061	44.608	99.5	100	100
BBTVA	Viruses	7	0	75.34	0	94.681	99	NaN	100
BBWVS	Viruses	2	0	26.592	0	53.183	99	NaN	100
BCTVC	Viruses	7	0	84.723	74	85.16	99	NaN	100
BDVV	Viruses	5	0	66.277	24.745	78.507	99	NaN	100
BECN1	Viruses	2	0	26.028	16.858	35.198	99	NaN	100
BEFVB	Viruses	12	12	70.807	6.085	81.912	88.261	0	94.855	70.807	6.085	81.912	88.261	0	94.855
BGYMJ	Viruses	9	0	86.337	56.021	93.331	99	NaN	100
BIFLO	Bacteria	1725	1656	75.528	31.903	86.898	95.041	33.116	97.987	75.405	32.433	86.75	95.038	33.298	97.976
BMV	Viruses	4	0	62.059	16.163	87.497	83.42	0	93.339
BNYVS	Viruses	9	0	75.481	37.434	79.88	92.128	0	97.146
BOMMO	Metazoa	14777	12652	68.118	34.681	77.921	91.765	34.826	95.978	66.72	35.995	76.415	91.111	35.275	95.611
BORBU	Bacteria	1289	994	72.889	8.48	85.766	88.802	31.287	94.302	75.589	7.367	87.461	90.907	30.792	95.646
BORPE	Bacteria	3261	2958	78.916	14.275	89.853	95.732	26.472	98.356	78.373	15.018	89.611	95.706	27.313	98.335
BOTVF	Viruses	2	0	84.565	86.024	83.106	99	NaN	100
BOTVX	Viruses	5	0	67.945	48.107	77.805	99	NaN	100
BOVIN	Metazoa	23870	13217	64.127	36.532	74.853	90.302	41.5	95.055	61.743	38.808	72.087	89.109	41.412	94.352
BPCHP	Viruses	8	0	74.375	0	87.5	99	NaN	100
BPHC1	Viruses	41	41	78.611	9.352	87.331	90.972	16.667	95.846	78.611	9.352	87.331	90.972	16.667	95.846
BPL2	Viruses	14	14	90.052	0	96.104	89.234	26.496	95.79	90.052	0	96.104	89.234	26.496	95.79
BPLC2	Viruses	39	39	82.595	9.635	92.114	90.219	30.899	96.203	82.595	9.635	92.114	90.219	30.899	96.203
BPM13	Viruses	9	0	89.398	37.804	94.174	99	NaN	100
BPML5	Viruses	85	85	78.719	26.911	88.575	96.977	53.583	99.089	78.719	26.911	88.575	96.977	53.583	99.089
BPMS2	Viruses	4	0	85.25	0	97	99	NaN	100
BPMU	Viruses	52	52	78.448	14.327	87.86	95.085	38.163	97.924	78.448	14.327	87.86	95.085	38.163	97.924
BPMX1	Viruses	4	0	60.473	0	71.946	99	NaN	100
BPN15	Viruses	60	59	78.809	19.161	89.84	93.609	46.136	97.862	78.541	15.487	89.85	93.517	46.136	97.825
BPN4	Viruses	72	72	87.372	32.879	93.928	92.363	41.328	96.171	87.372	32.879	93.928	92.363	41.328	96.171
BPP1	Viruses	110	108	77.739	20.331	86.428	93.095	46.412	97.101	78.616	21.374	86.902	93.217	45.055	97.259
BPP2	Viruses	43	42	85.773	38.182	93.021	94.854	35.237	97.546	85.458	38.182	92.855	94.755	35.237	97.487
BPP22	Viruses	64	64	78.915	20.354	88.771	95.478	46.785	97.758	78.915	20.354	88.771	95.478	46.785	97.758
BPPH6	Viruses	13	13	90.329	0	97.735	94.195	0	97.929	90.329	0	97.735	94.195	0	97.929
BPPHC	Viruses	53	52	80.193	35.44	88.354	95.01	20.395	97.877	80.773	37.128	88.13	94.933	20.395	97.836
BPPHE	Viruses	221	219	80.47	15.738	88.946	91.749	41.754	95.424	80.524	15.966	88.844	91.679	40.221	95.384
BPPHM	Viruses	11	11	81.634	70.015	82.424	93.092	50	96.911	81.634	70.015	82.424	93.092	50	96.911
BPPHS	Viruses	10	10	81.129	55.493	81.261	92.506	0	96.813	81.129	55.493	81.261	92.506	0	96.813
BPPM2	Viruses	21	21	82.59	0	90.513	89.05	0	94.099	82.59	0	90.513	89.05	0	94.099
BPPRD	Viruses	30	29	81.138	15.995	88.878	95.68	63.369	97.978	80.522	15.995	88.494	95.566	63.369	97.908
BPSPB	Viruses	185	185	82.126	7.675	90.175	91.867	28.504	95.877	82.126	7.675	90.175	91.867	28.504	95.877
BPT4	Viruses	273	267	82.165	13.38	91.437	95.305	37.612	97.698	81.97	13.548	91.245	95.222	37.612	97.646
BPT5	Viruses	162	161	82.129	17.344	89.659	92.972	29.432	96.409	82.024	17.344	89.595	92.934	29.432	96.387
BPT7	Viruses	56	54	76.622	32.639	83.846	93.812	30.058	96.903	77.153	33.999	84.165	93.62	30.058	96.789
BPV3	Viruses	8	0	82.831	56.238	93.762	84.486	0	95.471
BPV5	Viruses	6	0	46.752	11.481	67.602	88.583	0	95.5
BRADI	Embryophyta	29942	15654	62.627	32.586	76.519	92.906	36.228	96.792	59.604	35.487	72.736	92.308	36.554	96.45
BRAFL	Metazoa	28544	16704	67.646	36.607	76.893	92.669	42.268	96.377	65.62	41.285	74.896	90.893	41.405	95.38
BRAJA	Bacteria	8253	7125	77.873	20.744	89.385	96.09	34.248	98.443	77.188	20.926	89.024	96.046	35.291	98.414
BRV1	Viruses	6	0	50.821	20	68.643	99	NaN	100
BSMV	Viruses	7	0	53.905	28.28	79.531	94.534	42.857	98.946
BSNV	Viruses	3	0	60.023	54.24	65.806	77.624	0	89.915
BSTV1	Viruses	1	0	41.939	33.307	50.571	78.843	74.699	82.987
BTV10	Viruses	11	10	78.642	40.001	90.921	74.524	0	86.684	76.934	28.355	90.691	78.566	0	88.531
BUCAI	Bacteria	572	570	82.602	3.183	91.903	93.874	13.354	97.443	82.544	3.183	91.874	93.856	13.354	97.434
BUNL8	Viruses	4	0	59.428	0	69.856	83.567	0	93.634
BUNYW	Viruses	4	0	63.246	0	77.492	99	NaN	100
BURPS	Bacteria	5717	5113	76.882	20.43	88.529	95.729	31.96	98.333	76.677	20.979	88.355	95.831	32.268	98.394
BVDVN	Viruses	1	0	40.18	27.465	52.895	99	NaN	100
BVY3	Viruses	1	0	45.757	56.891	34.623	99	NaN	100
BYDVP	Viruses	6	0	79.502	53.237	90.845	94.44	74.699	94.764
BYVU	Viruses	8	0	59.415	1.767	80.976	91.122	0	96.495
CAEBR	Metazoa	21700	16922	68.542	35.251	78.792	91.143	35.324	95.658	67.123	36.204	77.584	90.325	35.864	95.17
CAEEL	Metazoa	25153	15658	70.036	36.253	80.094	91.556	37.139	95.904	68.197	35.71	78.939	90.833	35.576	95.478
CAEJA	Metazoa	35063	17163	70.785	36.142	80.056	92.597	36.59	96.46	69.15	36.797	78.932	91.275	33.904	95.669
CALJA	Metazoa	42014	14561	62.144	36.632	72.715	89.932	41.586	94.784	61.111	37.848	71.186	89.526	40.204	94.536
CAMJE	Bacteria	1623	1583	80.552	8.337	89.873	89.816	27.3	95.005	80.616	8.304	89.895	89.798	27.252	95.003
CAMVS	Viruses	6	0	45.761	21.032	70.491	91	50	100
CANAL	Eukaryota	9109	6976	66.388	34.345	78.207	89.145	30.027	94.618	66.052	34.344	77.839	88.831	29.325	94.448
CANFA	Metazoa	26421	13961	62.486	39.137	72.213	89.386	41.096	94.421	61.281	41.372	70.184	89.133	40.436	94.272
CARMS	Viruses	4	0	64.787	33.333	80.075	99	NaN	100
CAUCR	Bacteria	3720	3529	73.959	18.494	86.145	96.279	36.742	98.577	73.906	18.664	86.191	96.289	37.254	98.589
CAVC1	Viruses	3	0	73.616	73.567	73.665	99	NaN	100
CAVPO	Metazoa	19910	12825	64.428	34.436	75.542	91.001	42.535	95.468	61.85	36.274	72.688	89.923	42.446	94.832
CCHFI	Viruses	3	0	62.099	44.971	61.55	53.468	0	74.268
CENSY	Archaea	2022	1822	72.813	19.867	84.272	96.313	33.414	98.556	72.964	19.578	84.627	96.552	34.847	98.674
CFMVN	Viruses	4	0	74.278	65.933	74.607	99	NaN	100
CHICK	Metazoa	17624	11351	61.603	34.135	73.37	89.014	40.231	94.297	60.882	35.377	72.163	88.487	40.208	93.942
CHIKS	Viruses	2	0	43.524	38.103	48.945	67.426	0	85.852
CHLAA	Bacteria	3850	3588	83.003	19.438	92.064	95.064	36.603	97.95	83.187	19.739	92.171	95.174	36.801	98.028
CHLRE	Eukaryota	14337	12055	61.793	34.626	72.579	92.44	38.873	96.383	60.343	35.961	70.725	91.842	38.896	96.035
CHLTE	Bacteria	2250	2181	81.078	13.768	90.466	95.101	29.374	97.997	80.826	13.681	90.317	95.054	28.753	97.982
CHLTR	Bacteria	895	890	77.872	12.807	89.121	93.39	38.856	96.975	77.754	12.807	89.059	93.359	38.856	96.958
CHPVE	Viruses	2	0	39.453	18.919	59.987	66.168	0	83.336
CILVC	Viruses	6	0	80.474	33.333	95.282	88.021	0	94.376
CIOIN	Metazoa	17308	14703	71.082	32.705	80.158	93.16	39.871	96.637	70.245	34.43	79.035	92.948	40.294	96.495
CIOSA	Metazoa	20004	10614	66.875	29.823	77.503	92.241	39.735	96.148	67.923	35.268	77.019	92.772	40.168	96.453
CLBVS	Viruses	3	0	49.467	16.472	82.463	78.226	0	91.12
CLOAB	Bacteria	3847	3501	79.817	5.35	89.437	92.847	30.017	96.777	79.864	5.57	89.514	92.798	30.048	96.758
CLOBH	Bacteria	3590	3272	80.308	6.614	89.715	90.969	24.603	95.653	80.18	7.004	89.628	90.806	24.434	95.574
CMVFN	Viruses	5	0	61.522	41.797	81.246	99	NaN	100
COCIM	Eukaryota	9706	8900	67.428	42.817	77.793	91.836	33.825	96.178	67.258	43.675	77.3	91.914	34.41	96.216
COPC7	Eukaryota	13335	11054	68.389	45.119	78.078	91.943	37.62	96.214	67.853	46.748	76.965	91.616	38.485	96.005
COPV6	Viruses	7	0	62.941	38.266	79.082	89.638	48.387	95.451
CORGL	Bacteria	3093	2934	80.056	23.98	90.457	96.015	34.029	98.415	79.957	24.23	90.488	95.909	33.454	98.371
COXBU	Bacteria	1815	1753	84.551	16.311	92.005	94.179	31.518	97.575	84.428	15.501	92.069	94.088	31.606	97.523
COYMV	Viruses	3	0	31.815	18.521	45.109	87.809	81.86	93.758
CPMV1	Viruses	1	0	99	NaN	100	99	NaN	100
CPMVS	Viruses	5	0	59.6	0	80	86.809	0	95.217
CPRVZ	Viruses	1	0	99	NaN	100	99	NaN	100
CPSVP	Viruses	4	0	29.017	0	58.034	60.397	22.061	79.748
CPVKS	Viruses	2	0	66.363	49.057	83.67	99	NaN	100
CRLVP	Viruses	2	0	25.06	0	50.12	99	NaN	100
CRPVC	Viruses	2	0	44.608	17.594	71.622	59.313	0	69.625
CRPVK	Viruses	8	0	73.17	46.543	86.932	92.875	0	100
CRYHO	Eukaryota	3886	3826	57.802	20.775	71.393	88.157	29.301	94.083	57.55	20.763	71.154	88.097	29.437	94.054
CRYNJ	Eukaryota	6436	5866	63.865	44.087	73.627	89.205	32.346	94.804	63.355	44.845	72.754	88.895	32.594	94.63
CSVMV	Viruses	5	0	60.805	10.959	75.835	76.339	50.844	82.971
CTFVL	Viruses	13	12	81.537	53.402	89.088	98.913	95.743	100	80.082	53.402	88.179	98.906	95.743	100
CVH22	Viruses	8	0	83.092	32.775	92.643	93.907	43.689	96.602
CVHSA	Viruses	15	14	86.021	39.891	89.539	96.956	64.762	98.127	89.084	39.974	92.603	96.81	64.762	97.993
CVMA5	Viruses	11	10	74.1	26.337	82.774	91.595	59.048	95.813	77.124	24.494	85.651	91.326	44.286	95.394
DANRE	Metazoa	40745	14561	62.601	34.542	73.116	89.897	41.292	94.791	62.085	37.892	72.249	88.614	41.276	94.001
DAPPU	Metazoa	30137	18070	69.159	35.201	78.62	92.85	37.885	96.63	67.155	35.852	76.822	92.131	36.202	96.266
DEIRA	Bacteria	3085	2938	73.661	24.497	86.028	96.064	33.662	98.529	73.447	25.026	85.84	95.959	33.261	98.48
DEN1W	Viruses	1	0	36.816	0	73.632	99	NaN	100
DESVH	Bacteria	3517	3317	79.026	26.683	88.369	95.562	41.079	98.158	79.244	27.742	88.413	95.606	41.11	98.169
DHBVQ	Viruses	4	0	94.666	90.143	99.19	82.55	0	91.6
DICDI	Eukaryota	12744	10338	64.941	40.581	74.434	80.323	23.307	88.576	64.841	43.746	73.618	78.441	24.257	87.237
DICTD	Bacteria	1743	1651	86.023	3.086	94.081	90.555	23.737	95.551	86.02	3.245	94.125	90.436	23.573	95.495
DPV83	Viruses	165	165	84.08	14.87	93.336	95.905	27.273	98.525	84.08	14.87	93.336	95.905	27.273	98.525
DROME	Metazoa	19721	11996	66.286	42.463	75.34	87.518	34.981	93.358	66.252	41.7	75.61	87.935	33.116	93.735
DROPS	Metazoa	16756	12875	67.621	42.843	76.316	89.085	32.031	94.37	66.343	43.65	74.973	88.134	30.971	93.829
DUGBA	Viruses	3	0	40.857	25.388	56.326	78.771	0	92.209
DXV96	Viruses	3	0	74.524	71.158	77.891	77.895	0	90.457
EAVBU	Viruses	8	0	99.25	100	100	99	NaN	100
EBLV1	Viruses	5	0	52.697	18.68	70.849	99.142	100	99.883
EBLV2	Viruses	5	0	68.682	32.859	78.448	99	NaN	100
EBOZM	Viruses	9	0	69.502	53.047	80.962	84.822	33.333	93.201
EBVA8	Viruses	80	79	72.461	45.882	83.855	94.965	44.504	97.948	72.889	45.854	84.548	95.004	39.594	97.922
EBVB9	Viruses	118	87	66.839	54.43	68.099	96.264	44.504	98.608	73.959	52.325	81.842	95.371	39.594	98.112
ECOLI	Bacteria	4303	3894	85.73	13.581	92.952	95.024	32.106	97.974	85.845	14.347	93.017	94.983	31.008	97.97
EHV2	Viruses	77	76	69.885	40.039	81.665	97.136	41.957	99.183	70.65	40.357	82.74	97.952	55.943	99.563
EMARV	Viruses	4	0	68.066	0	87.133	83.683	0	93.867
EMCVR	Viruses	2	0	13.862	0	27.724	99.5	100	100
EMENI	Eukaryota	10555	9519	68.879	41.357	79.689	91.937	34.75	96.234	68.434	42.696	78.837	91.579	34.822	96.031
ENCCU	Eukaryota	2008	1901	70.51	17.582	83.911	91.859	34.251	96.132	70.198	16.275	83.908	91.977	31.94	96.206
ENTFA	Bacteria	3240	2947	83.274	19.618	91.527	92.883	29.839	96.685	83.449	18.682	91.717	92.698	29.432	96.587
ENTHI	Eukaryota	7959	6031	67.236	22.281	81.656	86.61	35.194	92.842	66.399	22.396	81.075	86.505	37.41	92.642
FCVUR	Viruses	3	0	74.938	0	84.543	76.076	0	86.818
FDVS	Viruses	12	12	68.739	20.034	91.456	92.374	30.54	97.992	68.739	20.034	91.456	92.374	30.54	97.992
FIPV	Viruses	10	10	89.909	53.354	90.748	99	NaN	100	89.909	53.354	90.748	99	NaN	100
FLAPJ	Bacteria	2420	2340	83.791	8.529	92.087	93.838	28.615	97.274	83.792	8.51	92.098	93.836	29.131	97.265
FOWPN	Viruses	251	245	85.511	10.688	93.546	93.956	28.196	97.421	86.1	10.59	94.179	94.345	27.921	97.554
FRATT	Bacteria	1528	1499	85.532	10.592	92.905	93.56	28.577	97.207	85.64	10.842	92.981	93.588	28.345	97.214
FRG3G	Viruses	98	98	69.598	35.568	77.921	94.587	12.5	98.154	69.598	35.568	77.921	94.587	12.5	98.154
FUSNN	Bacteria	2046	1905	79.382	5.109	89.907	89.549	24.06	94.939	79.669	5.424	90.103	89.581	23.944	94.962
GAHVM	Viruses	90	87	68.174	29.151	83.482	95.811	11.933	98.403	67.82	27.555	82.984	96.493	14.916	98.806
GASAC	Metazoa	27248	13150	63.558	34.572	75.248	90.935	41.713	95.452	62.586	38.905	72.548	90.23	41.464	95.032
GEOSL	Bacteria	3402	3169	78.518	13.495	88.852	94.156	36.768	97.357	78.792	13.617	89.123	94.373	37.105	97.516
GFKVM	Viruses	4	0	53.073	57.039	49.106	99	NaN	100
GIAIC	Eukaryota	7154	6452	66.065	25.418	76.041	93.485	48.593	96.808	67.473	26.756	77.298	93.092	48.503	96.562
GIBZE	Eukaryota	13104	12112	70.373	42.733	80.941	92.574	34.931	96.591	70.017	43.833	80.227	92.259	35.103	96.416
GLOVI	Bacteria	4406	3823	78.864	17.318	89.487	95.209	40.186	97.902	79.307	18.017	89.655	95.299	36.852	97.989
GLRV3	Viruses	13	12	87.942	48.415	89.327	99	NaN	100	90.415	36.311	93.112	99	NaN	100
GLVWB	Viruses	2	0	100	100	100	99	NaN	100
GORGO	Metazoa	27286	14704	61.656	36.4	72.087	90.149	41.456	94.905	61.49	37.999	71.485	89.786	40.005	94.679
GRVMC	Viruses	3	0	67.729	66.258	69.2	99	NaN	100
GVAIS	Viruses	5	0	49.601	0	79.601	99	NaN	100
GVCPM	Viruses	143	141	77.375	20.561	87.99	95.247	52.453	97.273	77.068	20.561	87.817	95.194	52.453	97.234
HAEIN	Bacteria	1707	1665	85.882	12.66	93.258	93.908	30.626	97.275	85.806	12.208	93.239	93.869	30.954	97.269
HALSA	Archaea	2426	2243	71.212	30.48	83.16	94.849	31.579	97.831	70.843	30.026	82.878	94.922	30.956	97.853
HANTV	Viruses	3	0	36.815	0	73.63	99.27	100	99.874
HASV	Viruses	3	0	68.235	61.027	75.442	99	NaN	100
HASV1	Viruses	3	0	57.727	63.62	51.833	84.876	73.75	87.918
HAVHM	Viruses	1	0	20.759	0	41.519	37.141	0	74.282
HBVCJ	Viruses	5	0	73.147	61.07	85.224	99	NaN	100
HCMVM	Viruses	168	166	70.385	39.66	82.358	96.65	38.364	98.85	70.351	39.462	82.549	96.622	38.364	98.836
HCVH	Viruses	2	0	68.301	57.887	78.715	67.193	0	85.386
HDVD3	Viruses	2	0	50	100	0	59.356	58.947	59.765
HELPY	Bacteria	1553	1493	77.958	12.982	87.72	89.948	32.603	94.908	78.247	13.086	88.037	90.087	32.325	95.018
HENDH	Viruses	9	0	71.123	49.046	76.882	95.586	60.714	97.315
HEVCH	Viruses	3	0	61.157	49.718	72.597	99	NaN	100
HHV11	Viruses	73	73	71.973	59.317	78.505	96.113	36.316	98.451	71.973	59.317	78.505	96.113	36.316	98.451
HHV2H	Viruses	74	73	71.279	57.949	77.814	95.77	29.367	98.176	70.885	57.259	77.506	95.725	29.367	98.151
HHV6U	Viruses	103	100	74.905	27.207	84.652	96.901	51.121	98.988	74.615	26.163	84.841	96.838	51.121	98.958
HHV6Z	Viruses	97	97	78.042	29.647	87.421	94.003	31.85	97.508	78.042	29.647	87.421	94.003	31.85	97.508
HHV8P	Viruses	86	84	78.82	42.794	89.169	94.596	31.129	97.412	78.975	42.208	89.84	95.254	35.576	97.71
HIS1I	Viruses	35	35	81.624	21.578	89.266	97.114	50	98.97	81.624	21.578	89.266	97.114	50	98.97
HMPVC	Viruses	9	0	84.34	46.958	87.694	92.014	0	96.917
HORSE	Metazoa	22677	12723	62.183	33.23	73.191	89.468	46.236	94.497	62.257	37.467	72.588	89.161	41.954	94.334
HPBVH	Viruses	3	0	80.432	84.548	71.832	72.901	0	80.468
HPE2W	Viruses	1	0	60.852	54.091	67.614	99	NaN	100
HPV04	Viruses	7	0	71.36	46.48	81.521	99	NaN	100
HPV05	Viruses	8	0	75.974	64.586	74.832	84.773	0	96.046
HPV16	Viruses	8	0	65.737	31.787	91.41	99	NaN	100
HPV1A	Viruses	8	0	73.954	40	84.18	92.875	0	100
HPV41	Viruses	11	11	65.906	34.065	74.498	92.954	0	96.816	65.906	34.065	74.498	92.954	0	96.816
HRSVB	Viruses	11	11	78.08	25.247	91.229	99.091	100	100	78.08	25.247	91.229	99.091	100	100
HRV8A	Viruses	1	0	13.207	0	26.415	99	NaN	100
HTL1C	Viruses	9	0	72.805	55.998	80.278	95.968	87.067	95.151
HTL32	Viruses	6	0	41.916	14.165	55.694	99	NaN	100
HTLV2	Viruses	6	0	51.8	32.353	71.246	99	NaN	100
HUMAN	Metazoa	68936	19215	68.38	37.967	76.267	92.917	42.859	96.416	63.752	38.947	71.894	91.455	40.772	95.664
HV19S	Viruses	2	0	67.018	50	84.036	99	NaN	100
HV1H2	Viruses	9	0	72.491	45.38	82.061	90.424	68.114	92.81
HV2BE	Viruses	9	0	62.274	55.376	59.7	92.056	0	97.001
HYPBU	Archaea	1602	1558	83.819	7.394	93.615	93.161	25.216	96.863	84.052	7.684	93.752	93.12	25.221	96.836
I34A1	Viruses	12	11	57.023	5.871	85.143	81.459	18.902	91.283	57.662	6.605	83.792	85.834	25.203	93.521
I96A0	Viruses	12	11	74.747	26.49	87.25	93.421	50	96.842	72.543	26.49	86.091	92.914	50	96.554
IBDVU	Viruses	3	0	72.167	67.839	76.495	77.617	0	89.901
IBVB	Viruses	10	9	79.673	19.23	84.976	99	NaN	100	86.594	28.845	90.557	99	NaN	100
ICHVA	Viruses	76	75	75.107	37.303	88.154	97.159	68.847	99.004	74.789	37.303	87.996	97.135	68.847	98.991
ICRSV	Viruses	6	0	76.612	49.106	87.821	99	NaN	100
IHNVW	Viruses	6	0	67.701	41.595	75.005	96.453	67.442	100
IIV3	Viruses	126	126	75.199	26.935	86.698	93.497	30.939	96.978	75.199	26.935	86.698	93.497	30.939	96.978
IIV6	Viruses	468	455	82.181	13.176	89.154	96.076	49.803	98.271	82.755	13.951	89.445	96.01	43.331	98.226
INBLE	Viruses	11	11	66.472	10.417	82.716	98.607	89.362	100	66.472	10.417	82.716	98.607	89.362	100
INCAA	Viruses	8	0	37.385	11.756	63.015	98.099	90.789	100
IPNVJ	Viruses	3	0	57.932	38.791	77.074	77.346	0	89.359
ISAV8	Viruses	10	10	40.854	8.162	55.579	92.449	50	96.498	40.854	8.162	55.579	92.449	50	96.498
IXOSC	Metazoa	20473	16770	71.995	36.814	79.91	95.098	37.849	97.847	69.561	38.697	77.367	94.655	38.791	97.587
JDNVP	Viruses	4	0	61.656	43.466	79.846	99	NaN	100
KORCO	Archaea	1602	1535	80.635	2.257	91.593	94.312	30.688	97.473	81.01	2.393	91.855	94.358	29.33	97.56
KORVE	Bacteria	4771	4479	77.641	19.31	88.647	94.77	29.24	97.91	77.8	19.666	88.745	94.735	29.812	97.879
LACLA	Bacteria	2225	2065	83.182	13.064	91.676	93.548	32.857	97.148	82.964	12.942	91.477	93.459	31.914	97.111
LACPL	Bacteria	3088	2766	87.199	21.878	93.424	95.599	28.013	98.275	87.019	21.535	93.389	95.69	29.717	98.317
LAMBD	Viruses	66	66	76.693	14.757	86.917	91.026	23.038	95.41	76.693	14.757	86.917	91.026	23.038	95.41
LASSJ	Viruses	4	0	49.389	0	74.278	82.904	0	92.309
LATCH	Metazoa	23436	12447	64.361	30.674	76.274	89.504	42.66	94.579	62.617	32.831	73.986	88.688	41.564	94.031
LBVAV	Viruses	6	0	68.124	16.201	79.147	99	NaN	100
LCDV1	Viruses	1	0	33.518	0	67.036	99	NaN	100
LDCPR	Viruses	10	10	67.162	29.752	84.098	98.171	89.706	100	67.162	29.752	84.098	98.171	89.706	100
LEIBR	Eukaryota	8102	7433	59.934	36.216	70.091	90.262	39.832	95.08	59.095	36.631	68.983	89.871	39.933	94.859
LEIIN	Eukaryota	8047	7559	59.454	37.508	69.141	89.139	37.903	94.52	58.804	38.06	68.207	88.836	38.047	94.338
LEIMA	Eukaryota	8041	7527	59.328	36.937	69.286	89.429	38.054	94.657	58.772	37.601	68.449	89.106	38.3	94.457
LEPIN	Bacteria	3676	3446	76.53	7.817	88.102	94.096	32.624	97.484	77.033	8.179	88.436	94.063	29.125	97.46
LISMO	Bacteria	2844	2652	83.489	13.433	91.863	92.652	29.528	96.742	83.197	13.391	91.738	92.5	29.393	96.649
LIYV9	Viruses	9	0	85.815	60.104	90.472	84.719	0	93.216
LNYV3	Viruses	6	0	50.986	12.288	75.399	77.931	0	90.529
LOLV	Viruses	6	0	76.665	49.547	79.556	99	NaN	100
LOXAF	Metazoa	25615	13040	64.951	36.307	75.13	90.489	42.602	95.154	61.748	37.17	72.353	89.559	42.102	94.57
LRVLG	Viruses	3	0	82.667	0	100	99	NaN	100
LYCVA	Viruses	4	0	61.749	0	74.498	99	NaN	100
MABVM	Viruses	7	0	79.273	61.719	86.46	80.066	29.524	91.479
MACMU	Metazoa	35538	14817	63.223	35.867	73.681	90.755	42.41	95.245	61.798	38.332	71.72	89.891	40.45	94.797
MBVLF	Viruses	4	0	93.346	92.068	91.659	99	NaN	100
MCMVK	Viruses	4	0	52.485	36.89	68.079	99	NaN	100
MCV1	Viruses	163	163	72.962	29.812	84.318	96.396	35.548	98.624	72.962	29.812	84.318	96.396	35.548	98.624
MDBVW	Viruses	53	36	83.637	28.28	87.691	99	NaN	100	83.131	30.846	86.916	99	NaN	100
MEASC	Viruses	8	0	77.792	57.058	83.174	90.499	45.588	96.101
MELGA	Metazoa	16537	10595	63.086	31.778	74.867	89.092	40.864	94.224	62.592	32.937	73.959	88.471	40.234	93.881
MESFL	Bacteria	683	660	76.917	5.825	89.153	89.075	25.509	94.69	77.008	6.045	89.159	89.01	24.96	94.629
METAC	Archaea	4468	3613	79.449	14.705	89.672	92.481	0.344	96.383	79.547	15.97	89.713	92.598	0.434	96.432
METHJ	Archaea	3087	2746	84.821	13.94	93.342	94.876	31.982	97.804	84.958	14.237	93.418	95.016	32.985	97.903
METJA	Archaea	1787	1686	82.985	1.672	92.497	89.429	21.09	94.803	82.708	1.741	92.365	89.274	21.328	94.691
METKA	Archaea	1687	1610	67.728	9.945	83.483	91.357	21.73	96.017	67.784	10.078	83.376	91.19	21.854	95.921
METTH	Archaea	1869	1773	78.555	8.668	89.695	94.203	23.835	97.549	78.383	7.921	89.6	94.273	25.09	97.578
MILVL	Viruses	7	0	49.616	0	71.232	89.622	0	95.245
MIMIV	Viruses	909	846	78.549	27.748	88.582	94.286	34.216	97.589	78.346	28.546	88.37	94.284	33.697	97.56
MLVMS	Viruses	3	0	79.506	77.793	81.219	54.459	28	80.918
MMTVC	Viruses	5	0	61.939	32.082	91.795	99.2	100	100
MMVR	Viruses	6	0	75.309	39.321	91.737	99	NaN	100
MNPVA	Viruses	6	0	89.684	71.381	94.677	99	NaN	100
MOKV	Viruses	5	0	51.105	19.553	82.656	99	NaN	100
MONBE	Eukaryota	9188	8339	66.88	42.001	76.307	89.728	40.762	94.794	66.437	42.779	75.855	89.499	40.613	94.645
MONDO	Metazoa	22240	13207	62.284	33.325	73.191	89.165	39.41	94.205	60.637	36.858	70.959	88.239	39.289	93.623
MOOTA	Bacteria	2451	2282	84.816	13.27	92.993	94.065	33.486	97.446	84.836	13.958	93.029	94.208	35.329	97.501
MOUSE	Metazoa	43284	15836	66.376	38.151	74.979	91.471	43.606	95.594	62.815	39.064	71.999	90.182	41.43	94.931
MPRVN	Viruses	11	11	56.175	24.055	74.851	99.089	100	99.997	56.175	24.055	74.851	99.089	100	99.997
MRFVC	Viruses	2	0	41.33	46.009	36.651	99	NaN	100
MSVS	Viruses	4	0	61.691	33.333	73.883	99	NaN	100
MUHVS	Viruses	15	15	75.001	55.329	86.139	94.807	0	98.147	75.001	55.329	86.139	94.807	0	98.147
MUMIP	Viruses	7	0	72.428	48.787	74.978	99	NaN	100
MUMPM	Viruses	8	0	77.861	49.773	87.864	82.934	0	92.369
MYCMS	Bacteria	978	812	77.431	12.189	87.647	86.939	25.037	93.485	78.275	11.226	87.923	87.938	25.329	93.896
MYCPN	Bacteria	687	565	76.489	21.512	86.912	91.024	35.78	95.913	79.842	16.676	89.589	91.225	30.982	95.956
MYCS2	Bacteria	6601	5845	78.21	24.748	89.22	96.927	29.591	98.963	78.09	25.953	89.047	96.877	28.753	98.929
MYCTU	Bacteria	3982	3566	76.262	24.212	87.833	96.793	29.056	98.877	76.894	25.101	88.346	96.823	28.82	98.886
MYOLU	Metazoa	20650	12414	63.941	35.917	74.801	90.272	40.727	95.044	61.725	38.213	72.23	88.919	40.46	94.248
MYRV9	Viruses	11	11	64.742	23.943	85.343	99	NaN	100	64.742	23.943	85.343	99	NaN	100
MYXVL	Viruses	158	157	87.041	25.401	93.542	98.168	33.333	99.565	86.965	25.401	93.501	98.163	33.333	99.562
NANEQ	Archaea	536	535	85.704	5.107	93.674	90.186	35.289	95.124	85.679	5.107	93.662	90.169	35.289	95.115
NCBVS	Viruses	2	0	75.766	75.233	76.298	67.52	0	86.04
NDVB1	Viruses	8	0	79.332	76.404	74.161	87.528	35.149	92.769
NECH7	Eukaryota	15709	12850	70.56	39.972	81.909	92.559	32.537	96.64	69.07	42.562	79.925	91.78	33.62	96.202
NEIG1	Bacteria	1963	1869	82.296	20.82	90.933	95.146	37.915	97.925	82.869	20.316	91.267	95.28	38.398	97.98
NEIMB	Bacteria	2001	1895	83.677	21.757	91.521	95.209	37.553	98.007	83.937	20.761	91.632	95.144	37.933	97.962
NEMVE	Metazoa	24435	16015	70.56	28.438	79.222	93.895	39.04	97.072	67.657	30.945	76.917	92.549	39.71	96.292
NEUCR	Eukaryota	9840	9502	67.529	50.208	75.443	89.765	33.901	95.04	67.359	50.764	74.974	89.559	33.963	94.921
NITMS	Archaea	1795	1693	75.215	11.32	87.025	92.511	28.533	96.581	74.871	11.144	86.861	92.277	28.709	96.458
NODAM	Viruses	3	0	80.873	62.963	98.783	99.333	100	100
NOMLE	Metazoa	19734	13683	60.966	35.817	72.087	89.737	40.678	94.726	60.585	37.727	71.218	89.145	39.73	94.36
NPVR1	Viruses	149	149	83.096	25.322	92.53	94.27	43.258	97.153	83.096	25.322	92.53	94.27	43.258	97.153
NVN68	Viruses	3	0	41.219	20.32	62.119	78.428	0	91.522
OCSVU	Viruses	3	0	52.592	0	72.517	99	NaN	100
OLV2I	Viruses	4	0	41.144	14.221	68.067	83.408	0	93.317
ORENI	Metazoa	26753	12421	61.471	34.71	73.356	89.195	43.063	94.387	61.95	38.25	72.691	88.176	41.453	93.784
ORNAN	Metazoa	23551	14918	68.448	36.988	77.683	92.323	42.28	96.107	65.361	39.582	74.368	91.332	41.119	95.543
ORYLA	Metazoa	24632	12601	63.334	32.43	75.172	90.928	42.93	95.459	61.732	35.106	72.535	90.233	42.834	95.003
ORYSJ	Embryophyta	63235	33658	64.077	41.608	72.062	93.918	36.325	97.233	61.621	44.539	67.393	95.112	35.297	97.941
OSHVF	Viruses	116	115	67.981	24.117	80.635	91.591	38.538	96.458	68.287	24.482	80.767	92.099	40.373	96.721
OTOGA	Metazoa	19930	12850	62.965	35.401	74.058	89.967	40.624	94.848	61.026	37.18	71.869	88.83	40.397	94.18
OUMVV	Viruses	3	0	74.254	50	82.507	78.382	0	91.43
PANTR	Metazoa	20127	13579	61.929	36.241	72.719	90.388	41.644	95.073	61.098	38.055	71.664	89.461	40.811	94.53
PAPVE	Viruses	15	15	71.55	38.069	77.063	99	NaN	100	71.55	38.069	77.063	99	NaN	100
PARTE	Eukaryota	39461	18963	55.67	18.741	70.311	83.258	38.45	90.421	56.491	18.148	70.768	82.962	38.792	90.189
PAVBP	Viruses	3	0	71.847	55.075	88.619	99	NaN	100
PBCV1	Viruses	793	762	83.394	24.187	90.215	97.137	46.371	99.074	83.622	23.964	90.264	97.144	47.475	99.074
PCV1C	Viruses	2	0	50	0	100	99	NaN	100
PCV87	Viruses	7	0	59.622	0	77.244	78.987	44.561	90.51
PCVC	Viruses	4	0	53.985	31.306	76.664	83.386	0	93.272
PEDHC	Metazoa	10763	9927	62.207	29.414	73.681	88.285	32.67	93.895	61.196	29.75	72.567	87.918	33.045	93.683
PEMVW	Viruses	5	0	70.366	68.097	72.636	99	NaN	100
PHANO	Eukaryota	15998	15231	70.585	42.677	79.868	93.608	37.408	97.094	70.294	43.467	79.308	93.463	37.561	97.016
PHATC	Eukaryota	10465	9115	66.641	34.709	78.379	92.604	33.152	96.696	65.546	34.981	77.367	92.177	33.552	96.465
PHYIT	Eukaryota	17609	12199	66.119	32.426	77.735	91.314	38.295	95.655	63.264	34.575	74.939	89.743	39.01	94.721
PHYPA	Embryophyta	34837	18232	65.948	31.852	78.658	92.745	42.381	96.64	65.045	30.676	77.642	94.054	36.259	97.361
PIG	Metazoa	26069	13758	66.418	36.923	76.065	91.356	41.579	95.649	63.273	38.972	72.924	90.047	41.316	94.886
PLABA	Eukaryota	11656	10015	72.728	21.726	81.068	89.155	18.947	94.281	72.786	20.936	80.967	88.716	17.474	94.018
PLACH	Eukaryota	14614	11947	76.166	27.197	83.352	90.943	19.273	95.414	76.466	27.563	83.297	90.561	18.72	95.18
PLAF7	Eukaryota	5325	4910	53.969	28.684	65.377	69.57	17.235	80.681	54.655	29.919	65.537	69.284	17.427	80.378
PLAKH	Eukaryota	5100	4809	59.853	38.721	69.383	80.161	23.273	89.224	60.931	39.721	70.392	80.08	23.625	89.148
PLAVS	Eukaryota	5389	5070	63.957	44.76	72.976	82.127	25.579	90.335	63.766	45.277	72.517	81.73	25.487	90.088
PLAYO	Eukaryota	7757	6188	61.453	24.669	71.816	81.264	16.882	89.176	61.326	27.725	70.596	78.941	16.858	87.59
PLRV1	Viruses	9	0	72.378	64.748	72.619	78.137	0	90.941
PMTVS	Viruses	7	0	71.905	27.324	86.196	88.754	0	93.508
PMVK	Viruses	5	0	71.546	43.226	88.911	99	NaN	100
PNLV	Viruses	4	0	72.716	50.157	83.314	83.615	0	93.73
POL1M	Viruses	1	0	73.11	56.262	89.958	99	NaN	100
POLPA	Eukaryota	12351	10072	69.105	39.184	79.458	87.567	30.071	93.546	68.471	42.05	78.531	86.367	30.785	92.813
POLVP	Viruses	4	0	86.685	50	99.369	99	NaN	100
PONAB	Metazoa	22785	14434	62.781	36.301	73.397	90.403	41.119	95.084	61.679	38.118	71.769	89.752	40.304	94.708
POPTR	Embryophyta	41794	18176	68.36	26.325	80.4	93.584	35.679	97.121	65.705	28.901	77.575	93.127	35.558	96.881
PRIPA	Metazoa	29079	22212	71.301	35.884	80.073	92.627	34.555	96.304	69.583	37.859	78.115	91.823	35.372	95.805
PROMA	Bacteria	1881	1813	79.701	11.492	90.084	94.958	28.269	97.848	79.677	11.25	90.19	95.068	28.573	97.918
PSEAE	Bacteria	5563	5038	74.936	11.291	86.899	94.345	31.743	97.574	74.687	11.792	86.716	94.247	31.709	97.533
PSHV1	Viruses	71	71	66.241	41.788	78.026	94.73	41.778	97.794	66.241	41.788	78.026	94.73	41.778	97.794
PUCGT	Eukaryota	15808	10413	66.484	46.932	74.896	92.3	31.689	96.465	65.095	47.407	72.92	91.854	31.992	96.199
PVCV1	Viruses	1	0	44.2	44.3	44.1	33.272	0	66.544
PVMR	Viruses	6	0	96.026	64.327	99.665	99	NaN	100
PVXX3	Viruses	5	0	83.066	29.628	95.482	86.752	0	95.103
PVYN	Viruses	2	0	42.542	23.358	61.726	99	NaN	100
PYFV1	Viruses	1	0	14.75	0	29.5	99	NaN	100
PYRAE	Archaea	2590	2350	90.61	12.098	95.951	95.495	33.904	98.113	90.7	12.56	95.976	95.684	34.225	98.226
PYRFU	Archaea	2045	1887	86.111	4.338	94.19	91.535	21.662	96.008	86.075	4.463	94.176	91.543	22.599	95.955
PYRKO	Archaea	2301	2166	84.721	9.039	93.244	92.617	28.11	96.589	84.553	9.16	93.17	92.535	28.532	96.53
PZSVT	Viruses	4	0	69.874	33.333	90.249	99	NaN	100
RABIT	Metazoa	24391	12563	63.885	36.665	74.462	90.34	41.521	95.113	61.422	38.282	71.76	89.587	41.891	94.652
RABVP	Viruses	5	0	51.692	20	83.384	99	NaN	100
RAT	Metazoa	27353	13975	64.796	36.353	75.202	90.684	42.329	95.201	61.738	38.377	72.048	89.38	40.918	94.508
RBDVR	Viruses	3	0	29.78	0	59.561	99	NaN	100
RCNMV	Viruses	3	0	61.359	33.333	89.385	99	NaN	100
RDVF	Viruses	13	13	72.011	41.436	85.181	88.942	33.333	94.807	72.011	41.436	85.181	88.942	33.333	94.807
REOVL	Viruses	11	11	64.336	21.684	79.237	85.595	28.165	92.236	64.336	21.684	79.237	85.595	28.165	92.236
RFVKA	Viruses	153	151	87.344	23.297	94.266	97.328	0	99.218	87.19	23.297	94.19	97.306	0	99.208
RGDV	Viruses	12	12	72.892	29.259	87.882	87.703	29.412	94.553	72.892	29.259	87.882	87.703	29.412	94.553
RGMVD	Viruses	1	0	40.891	47.853	33.929	99	NaN	100
RHDVF	Viruses	2	0	56.799	0	64.599	66.633	0	84.266
RHIO9	Eukaryota	16968	9638	69.887	31.357	80.949	91.278	38.798	95.723	69.301	34.099	79.502	90.106	36.61	94.989
RHOBA	Bacteria	7271	6872	69.037	26.414	80.288	95.642	35.098	98.258	69.112	26.427	80.34	95.647	35.056	98.258
RHORT	Bacteria	3835	3592	75.414	17.738	87.877	95.933	36.072	98.34	75.112	17.998	87.744	95.965	36.811	98.358
RHOS4	Bacteria	4240	3927	72.651	15.39	85.438	95.513	31.67	98.204	72.551	15.833	85.378	95.557	31.478	98.231
RICPR	Bacteria	834	827	85.624	6.253	93.152	92.683	24.245	96.652	85.511	6.253	93.094	92.63	24.245	96.624
ROTHC	Viruses	11	11	72.765	11.538	86.831	92.26	69.202	96.993	72.765	11.538	86.831	92.26	69.202	96.993
ROTJ1	Viruses	11	11	59.13	0	73.715	79.039	29.756	91.098	59.13	0	73.715	79.039	29.756	91.098
ROTSH	Viruses	12	12	64.086	11.454	80.657	91.672	63.38	96.884	64.086	11.454	80.657	91.672	63.38	96.884
RRSVT	Viruses	11	11	70.509	35.461	82.815	98.949	96.875	100	70.509	35.461	82.815	98.949	96.875	100
RSVSA	Viruses	4	0	49.737	23.685	75.788	99	NaN	100
RSVT	Viruses	7	0	63.685	0	85.37	88.432	0	92.864
RTBVP	Viruses	4	0	42.1	0	59.699	71.686	51.634	80.146
RTSVA	Viruses	1	0	51.286	49.243	53.328	75.427	50.972	99.883
RUBVT	Viruses	2	0	50.448	60.629	40.266	66.144	0	83.287
RVFVZ	Viruses	4	0	48.152	0	71.803	99	NaN	100
SALRD	Bacteria	2812	2664	65.276	30.703	78.801	93.12	33.223	96.832	65.051	30.636	78.693	93.096	32.602	96.833
SALTY	Bacteria	4533	4160	85.635	15.871	92.952	95.017	31.433	97.981	85.776	16.001	93.036	94.926	31.234	97.951
SARHA	Metazoa	22388	13136	62.925	34.248	73.395	89.475	40.492	94.462	61.394	36.29	71.499	88.725	39.103	94.008
SBMVA	Viruses	4	0	92.887	82.412	99.466	99	NaN	100
SBWMN	Viruses	5	0	52.076	20	68.551	79.258	51.613	88.348
SCHMA	Metazoa	11711	9560	62.51	26.94	72.783	91.69	34.489	96.005	60.777	26.367	71.174	91.387	34.404	95.89
SCHPO	Eukaryota	5090	4713	66.558	29.336	80.021	90.111	33.501	95.186	66.405	30.129	79.468	89.885	33.982	95.054
SCLS1	Eukaryota	14400	13360	70.658	40.61	79.481	92.653	33.135	96.562	70.688	41.859	79.088	92.61	33.138	96.523
SCSVF	Viruses	8	0	67.205	18	86.41	99	NaN	100
SCV20	Viruses	1	0	31.089	0	62.179	99	NaN	100
SCVLA	Viruses	2	0	99	NaN	100	99	NaN	100
SDVS5	Viruses	2	0	37.44	30.448	44.431	36.159	0	72.318
SENDO	Viruses	9	0	74.171	65.758	75.419	91.842	0	96.574
SFAVA	Viruses	123	121	76.061	19.636	87.251	95.375	41.647	97.79	76.582	19.685	87.526	95.523	39.851	97.852
SFV	Viruses	2	0	51.499	49.541	53.457	67.465	0	85.93
SFVCP	Viruses	5	0	55.291	44.875	65.706	86.282	0	94.165
SHEON	Bacteria	4068	3877	83.78	13.425	91.989	94.434	33.824	97.573	83.835	13.326	92.031	94.339	34.108	97.518
SHIDS	Bacteria	3897	3277	85.728	13.248	93.286	95.28	35.887	98.091	85.086	14.434	92.798	94.852	31.661	97.878
SHV21	Viruses	75	75	75.23	22.54	86.668	93.474	45.783	97.302	75.23	22.54	86.668	93.474	45.783	97.302
SHVX	Viruses	6	0	64.26	38.542	80.069	88.402	0	95.138
SIFVH	Viruses	73	72	86.903	9.618	93.883	95.44	42.411	98.21	86.735	9.618	93.797	95.39	42.411	98.185
SINDV	Viruses	3	0	54.688	45.726	63.65	56.859	0	81.051
SIRV1	Viruses	43	42	95.423	33.333	97.358	93.77	20	98.61	95.338	33.333	97.295	93.646	20	98.577
SJNNV	Viruses	3	0	99.667	100	100	82.667	0	100
SOCMV	Viruses	9	0	46.626	24.554	60.537	89.663	54.545	95.811
SOLLC	Embryophyta	34836	18313	69.153	27.974	80.689	93.445	34.743	97.06	66.432	29.386	77.644	92.914	35.692	96.752
SOLTU	Embryophyta	53112	19436	69.436	32.447	80.344	93.265	33.803	96.957	66.237	33.439	77.288	92.936	34.206	96.786
SORBI	Embryophyta	32796	16843	64.969	34.868	77.004	93.553	37.065	97.121	61.215	38.145	72.525	92.718	37.3	96.623
SOYBN	Embryophyta	64664	17544	65.616	27.441	78.417	92.559	36.097	96.594	65.255	28.716	77.336	92.636	35.047	96.627
SPETR	Metazoa	19966	12915	64.161	35.241	75.014	90.153	41.427	94.918	61.826	37.286	72.317	89.064	41.194	94.26
SPMMV	Viruses	1	0	20.304	0	40.607	34.148	0	68.295
SPTNK	Viruses	21	21	62.092	21.895	80.545	95.348	74.571	98.274	62.092	21.895	80.545	95.348	74.571	98.274
SPV1C	Viruses	13	13	90.55	0	98.177	99	NaN	100	90.55	0	98.177	99	NaN	100
SPV1R	Viruses	12	12	89.683	0	97.699	99	NaN	100	89.683	0	97.699	99	NaN	100
SPV4	Viruses	9	0	84.033	33.333	90.575	91.641	0	96.17
SSDRV	Viruses	1	0	24.158	0	48.316	99	NaN	100
SSV1	Viruses	34	33	84.385	0	93.83	89.695	38.509	93.639	83.943	0	93.643	89.413	38.509	93.446
STAA8	Bacteria	2889	2668	84.031	18.672	91.172	93.173	30.215	96.863	84.285	18.638	91.363	93.029	29.929	96.784
STRCO	Bacteria	8038	6922	67.863	29.417	81.62	96.544	31.131	98.749	67.924	31.206	81.488	96.481	32.168	98.709
STRPU	Metazoa	28511	16282	68.545	38.707	78.754	91.2	38.199	95.603	67.222	43.474	76.755	89.877	37.937	94.816
STRR6	Bacteria	2029	1868	85.341	13.321	92.752	92.78	26.621	96.741	85.248	13.448	92.726	92.578	27.121	96.643
SULSO	Archaea	2938	2400	89.368	4.989	95.77	93.386	26.974	97.088	89.763	5.55	96.045	94.013	24.908	97.396
SV40	Viruses	6	0	69.802	41.148	79.505	99	NaN	100
SVSAP	Viruses	3	0	52.707	39.868	65.546	77.772	0	90.211
SWPV1	Viruses	146	145	86.573	10.674	93.688	96.342	25	98.684	86.487	10.674	93.645	96.324	25	98.675
SYNY3	Bacteria	3507	3181	83.539	17.5	92.186	94.664	40.618	97.725	83.496	18.412	92.154	94.832	41.95	97.795
TACVF	Viruses	4	0	49.415	0	74.33	83.01	0	92.52
TAEGU	Metazoa	18141	10894	64.579	31.176	74.816	90.296	39.652	94.936	63.029	34.102	73.228	88.61	38.901	93.938
TAKRU	Metazoa	47856	11819	61.01	34.187	72.703	89.238	43.456	94.432	61.936	36.074	73.047	88.9	41.139	94.232
TASV1	Viruses	3	0	26.085	17.734	34.435	29.332	0	58.663
TBSVC	Viruses	4	0	81.652	42.857	92.876	99	NaN	100
TETNG	Metazoa	23132	11790	62.829	33.716	74.545	90.715	42.761	95.281	62.413	35.437	73.617	90.581	43.005	95.267
TETTS	Eukaryota	24698	19405	54.01	22.145	66.342	78.025	32.336	86.628	53.324	24.858	64.929	76.098	33.436	85.113
THAPS	Eukaryota	11718	10197	62.964	36.515	73.034	90.947	34.332	95.749	61.721	37.597	71.61	90.517	34.522	95.504
THEAC	Archaea	1482	1450	85.779	5.135	94.361	95.929	26.64	98.481	85.691	5.213	94.307	95.907	26.921	98.471
THEAN	Eukaryota	3790	3515	59.093	23.422	73.091	88.906	28.666	94.575	58.853	23.251	72.924	88.487	28.626	94.329
THEAS	Bacteria	1737	1681	75.084	9.025	87.022	94.206	35.029	97.445	74.781	8.95	86.865	94.252	35.535	97.453
THEEB	Bacteria	2451	2267	82.264	14.542	91.684	95.052	43.05	97.867	83.467	16.185	92.422	95.147	42.49	97.951
THEMA	Bacteria	1852	1751	81.761	4.207	91.383	91.098	27.95	95.884	81.78	4.441	91.4	91.109	28.265	95.886
THEPA	Eukaryota	4071	3815	62.801	25.864	76.19	90.459	29.129	95.538	62.236	25.331	75.693	90.34	29.499	95.446
THEPD	Archaea	1876	1767	81.579	5.459	91.791	93.704	28.742	97.124	82.17	5.788	92.011	94.268	31.45	97.391
THET8	Bacteria	2227	2071	69.142	6.88	82.823	93.412	29.196	96.981	68.61	6.698	82.522	93.265	29.674	96.878
THEYD	Bacteria	1982	1889	82.431	4.623	91.313	91.593	29.971	95.963	82.195	4.779	91.163	91.606	30.456	95.938
THOGV	Viruses	7	0	62.679	0	83.358	99	NaN	100
TMV	Viruses	3	0	61.859	0	91.051	99	NaN	100
TNVA	Viruses	5	0	74.428	33.333	89.656	99	NaN	100
TOBSV	Viruses	5	0	54.55	34.288	74.812	99	NaN	100
TORVR	Viruses	4	0	29.724	7.858	51.591	99	NaN	100
TOTV	Viruses	3	0	37.767	0	75.534	78.751	50	91.503
TOXGO	Eukaryota	7841	7576	57.505	43.675	64.178	85.802	33.525	92.36	57.362	44.022	63.842	85.599	33.228	92.229
TPCTV	Viruses	6	0	71.236	44.259	80.3	87.569	0	93.47
TRIAD	Metazoa	11520	9360	71.98	27.375	83.211	91.671	37.02	95.907	69.799	29.15	81.364	90.915	37.975	95.476
TRIVA	Eukaryota	50191	18535	70.231	27.257	82.209	89.408	30.461	94.581	67.731	28.735	79.485	88.544	42.09	93.492
TRVPP	Viruses	6	0	58.788	0	84.909	88.839	0	96.011
TRYB2	Eukaryota	8587	7801	64.285	34.424	75.159	90.267	39.42	95.046	63.878	34.775	74.564	90.176	39.427	95.012
TSWV1	Viruses	5	0	35.544	0	71.087	98.481	94.872	99.588
TTV1K	Viruses	37	37	93.743	17.541	98.184	97.221	0	99.09	93.743	17.541	98.184	97.221	0	99.09
TTVA1	Viruses	2	0	75.531	54.053	97.009	99	NaN	100
TTVB1	Viruses	3	0	46.91	32.182	61.639	99	NaN	100
TTVD1	Viruses	3	0	94.691	94.675	94.706	99	NaN	100
TTVE1	Viruses	4	0	86.65	80.562	84.504	82.613	0	91.726
TTVF1	Viruses	3	0	58.982	37.821	80.144	99	NaN	100
TTVG1	Viruses	2	0	48.435	30.233	66.637	34.496	0	68.993
TTVI1	Viruses	3	0	82.151	70.303	84.766	99	NaN	100
TTVT1	Viruses	3	0	67.523	88.792	46.253	82.667	0	100
TTVZ1	Viruses	3	0	89.837	81.317	97.536	99	NaN	100
TUBMM	Eukaryota	7494	7112	69.611	45.5	78.731	91.707	34.671	96.095	69.193	45.963	78.158	91.521	34.516	95.986
TYMV	Viruses	3	0	53.3	56.419	50.18	99	NaN	100
USTMA	Eukaryota	6548	6263	60.97	43.043	70.671	89.437	32.946	94.943	60.483	43.151	70.034	89.284	33.471	94.849
UUKS	Viruses	4	0	57.959	0	66.918	83.458	0	93.417
VACCW	Viruses	217	215	86.324	22.951	92.631	96.228	37.578	98.355	86.206	22.951	92.562	96.203	37.578	98.34
VAR67	Viruses	199	197	86.137	19.326	92.854	95.656	30.615	98.053	86.006	19.326	92.782	95.622	30.615	98.033
VESVA	Viruses	3	0	63.063	37.95	68.16	99	NaN	100
VIBCH	Bacteria	3784	3596	84.367	12.259	92.083	93.726	33.867	97.266	84.29	12.354	92.067	93.712	34.088	97.263
VIBF1	Bacteria	3813	3606	82.446	11.981	91.204	93.645	33.645	97.239	82.561	11.737	91.372	93.707	34.01	97.258
VITVI	Embryophyta	29836	16024	68.785	25.935	81	93.553	34.264	97.096	66.316	29.086	77.962	92.97	34.362	96.772
VSIVA	Viruses	6	0	59.603	17.099	75.139	99	NaN	100
VZVD	Viruses	69	69	70.975	32.516	85.707	96.933	57.872	98.773	70.975	32.516	85.707	96.933	57.872	98.773
WBV24	Viruses	5	0	77.898	71.132	73.918	91.516	80.89	95.297
WCCVB	Viruses	2	0	66.61	50	83.219	99	NaN	100
WDSV	Viruses	6	0	65.042	35.372	84.275	78.119	33.333	90.572
WSSVS	Viruses	532	518	72.686	22.954	80.909	94.246	32.879	97.102	72.696	23.447	80.89	94.243	32.221	97.089
XANCP	Bacteria	4127	3864	74.931	19.962	86.993	95.881	38.827	98.335	74.67	19.577	86.909	95.805	35.565	98.296
XENTR	Metazoa	23488	11636	63.879	32.03	75.602	90.218	41.665	95.047	61.748	33.441	73.276	89.076	40.907	94.391
XMRV6	Viruses	3	0	77.232	77.504	76.961	35.626	0	71.253
YARLI	Eukaryota	6415	5787	69.395	43.657	79.958	89.176	33.336	94.574	68.799	45.178	78.98	88.558	33.651	94.227
YEAST	Eukaryota	6629	5725	67.406	33.647	78.915	90.006	33.043	95.054	66.371	33.213	77.797	89.579	33.846	94.785
YEFV1	Viruses	1	0	44.119	29.302	58.937	99	NaN	100
YERPE	Bacteria	3908	3673	84.373	14.583	92.383	94.726	26.96	97.797	84.614	15.012	92.548	94.718	26.644	97.788
YMTV5	Viruses	140	139	85.665	8.204	92.573	95.724	28.158	98.437	85.57	8.204	92.519	95.7	28.158	98.425

## Sheet: IUPred-ncoils
ORG	ALLRES	IDP_RES	CC_RES	CLG_RES	PURE_IDP_RES	PURE_CC_RES	PURE_CLG_RES	CC_IDP	CLG_IDP	CC_CLG	RES_PERSEQ	IDP_PERSEQ	CC_PERSEQ	CLG_PERSEQ	IDP_PER_LEN_PERSEQ	CC_PER_LEN_PERSEQ	CLG_PER_LEN_PERSEQ	CC_IDP_PERSEQ	CLG_IDP_PERSEQ	CLG_CC_PERSEQ	CCIDP_PER_IDP_PERSEQ	CLGIDP_PER_IDP_PERSEQ	CCIDP_PER_CC_PERSEQ	IDP_SEG	IDP_SEGSQ	CC_SEG	CC_SEGSQ	PURE_IDP_SEG	PURE_IDP_SEGSQ	PURE_CC_SEG	PURE_CC_SEGSQ	ALLRES_40	IDP_RES_40	CC_RES_40	CLG_RES_40	PURE_IDP_RES_40	PURE_CC_RES_40	PURE_CLG_RES_40	CC_IDP_40	CLG_IDP_40	CC_CLG_40	RES_PERSEQ_40	IDP_PERSEQ_40	CC_PERSEQ_40	CLG_PERSEQ_40	IDP_PER_LEN_PERSEQ_40	CC_PER_LEN_PERSEQ_40	CLG_PER_LEN_PERSEQ_40	CC_IDP_PERSEQ_40
AADNV	1532	297	43	0	269	15	0	28	0	0	510.67	99	14.3	0	0.192	0.0178	0	9.33	0	0	0.0594	0	0.651	5	3	0	0	4	3	0	0
AAV2S	2601	275	0	0	275	0	0	0	0	0	520.2	55	0	0	0.0927	0	0	0	0	0	0	0	NaN	5	3	0	0	5	3	0	0
ABLVB	3612	88	0	0	88	0	0	0	0	0	722.4	17.6	0	0	0.0593	0	0	0	0	0	0	0	NaN	2	1	0	0	2	1	0	0
ABPVR	2902	93	0	0	93	0	0	0	0	0	967.33	31	0	0	0.0343	0	0	0	0	0	0	0	NaN	2	1	0	0	2	1	0	0
ABVP	7181	126	114	0	98	86	0	28	0	0	132.98	2.33	2.11	0	0.0105	0.0203	0	0.519	0	0	0.283	0	0.233	3	3	1	1	2	2	0	0	7181	126	114	0	98	86	0	28	0	0	132.98	2.33	2.11	0	0.0105	0.0203	0	0.519
ACLSP	2537	242	0	0	242	0	0	0	0	0	845.67	80.7	0	0	0.15	0	0	0	0	0	0	0	NaN	2	2	0	0	2	2	0	0
ADE02	12874	2950	112	0	2920	82	0	30	0	0	286.09	65.6	2.49	0	0.26	0.0117	0	0.667	0	0	0.00829	0	0.25	42	27	2	2	42	27	1	1	12679	2825	112	0	2795	82	0	30	0	0	288.16	64.2	2.55	0	0.252	0.0119	0	0.682
ADEF1	8125	147	84	0	147	84	0	0	0	0	353.26	6.39	3.65	0	0.0135	0.019	0	0	0	0	0	0	0	4	4	0	0	4	4	0	0	8018	147	84	0	147	84	0	0	0	0	364.45	6.68	3.82	0	0.0142	0.0199	0	0
ADEG1	12494	990	42	0	973	25	0	17	0	0	328.79	26.1	1.11	0	0.0829	0.00366	0	0.447	0	0	0.0468	0	0.405	13	11	0	0	12	10	0	0	12494	990	42	0	973	25	0	17	0	0	328.79	26.1	1.11	0	0.0829	0.00366	0	0.447
ADEO7	9187	305	0	0	305	0	0	0	0	0	306.23	10.2	0	0	0.06	0	0	0	0	0	0	0	NaN	7	7	0	0	7	7	0	0	8814	246	0	0	246	0	0	0	0	0	326.44	9.11	0	0	0.0296	0	0	0
ADVG	1383	146	21	0	146	21	0	0	0	0	345.75	36.5	5.25	0	0.279	0.0089	0	0	0	0	0	0	0	3	2	0	0	3	2	0	0
AEDAE	7684696	1201519	170556	1220	1153563	123820	0	46736	1220	0	461.43	72.1	10.2	0.0733	0.126	0.0183	7.16e-05	2.81	0.0733	0	0.0422	0.000368	0.301	14127	6193	1706	951	13735	6053	1159	625	5831795	1023922	136739	942	984828	98587	0	38152	942	0	493.3	86.6	11.6	0.0797	0.144	0.0195	7.28e-05	3.23
AEVCA	2134	0	0	0	0	0	0	0	0	0	2134	0	0	0	0	0	0	0	0	0	NaN	NaN	NaN	0	0	0	0	0	0	0	0
AFV1Y	6405	46	93	0	16	63	0	30	0	0	160.12	1.15	2.33	0	0.00852	0.0203	0	0.75	0	0	0.652	0	0.333	1	1	1	1	0	0	0	0	6357	46	93	0	16	63	0	30	0	0	163	1.18	2.38	0	0.00874	0.0208	0	0.769
AFV2P	9110	211	77	0	211	77	0	0	0	0	175.19	4.06	1.48	0	0.0229	0.0138	0	0	0	0	0	0	0	5	4	0	0	5	4	0	0	9110	211	77	0	211	77	0	0	0	0	175.19	4.06	1.48	0	0.0229	0.0138	0	0
AGRT5	1660808	30199	11355	0	29418	10574	0	781	0	0	310.78	5.65	2.12	0	0.0193	0.00671	0	0.146	0	0	0.022	0	0.0541	481	367	61	55	469	358	53	47	1502253	29478	10267	0	28729	9518	0	749	0	0	309.42	6.07	2.11	0	0.0206	0.00669	0	0.154
AHV2H	1317	66	0	0	66	0	0	0	0	0	658.5	33	0	0	0.0506	0	0	0	0	0	0	0	NaN	1	1	0	0	1	1	0	0
AILME	11395861	1870363	333549	32605	1762931	258437	285	75112	32320	0	539.09	88.5	15.8	1.54	0.136	0.0243	0.00157	3.55	1.53	0	0.0428	0.0068	0.247	22086	9195	3651	1751	21265	8944	2719	1303	7593726	1422168	232961	17398	1350345	178382	154	54579	17244	0	561.67	105	17.2	1.29	0.159	0.0262	0.00141	4.04
AJECG	4155681	841155	66428	69	814197	39505	34	26923	35	0	451.02	91.3	7.21	0.00749	0.17	0.0136	2.07e-05	2.92	0.0038	0	0.0296	4.67e-05	0.387	9396	4429	597	378	9270	4375	291	179	4016255	835816	65547	69	809000	38766	34	26781	35	0	452.79	94.2	7.39	0.00778	0.175	0.0138	2.15e-05	3.02
ALHV1	34799	3506	282	0	3419	195	0	87	0	0	497.13	50.1	4.03	0	0.097	0.00865	0	1.24	0	0	0.0168	0	0.222	29	17	2	2	30	17	1	1	34799	3506	282	0	3419	195	0	87	0	0	497.13	50.1	4.03	0	0.097	0.00865	0	1.24
AMEPV	71083	342	1216	0	311	1185	0	31	0	0	255.69	1.23	4.37	0	0.00596	0.0159	0	0.112	0	0	0.133	0	0.0337	5	5	11	11	4	4	11	11	67732	342	840	0	311	809	0	31	0	0	254.63	1.29	3.16	0	0.00623	0.0129	0	0.117
AMPQE	11680538	1111221	304725	12034	1019928	224612	854	80113	11180	0	392.74	37.4	10.2	0.405	0.0867	0.0234	0.000831	2.69	0.376	0	0.0772	0.00651	0.238	13560	7631	3268	2007	12518	7184	2245	1432	6660650	868134	188388	7061	806121	133200	236	55188	6825	0	444.99	58	12.6	0.472	0.121	0.0248	0.000684	3.69
AMPV1	4353	604	21	0	604	21	0	0	0	0	483.67	67.1	2.33	0	0.154	0.00794	0	0	0	0	0	0	0	4	3	0	0	4	3	0	0
AMVLE	2437	0	21	0	0	21	0	0	0	0	609.25	0	5.25	0	0	0.00466	0	0	0	0	NaN	NaN	0	0	0	0	0	0	0	0	0
ANOCA	10131784	1363777	317864	28605	1264426	246796	322	71068	28283	0	530.21	71.4	16.6	1.5	0.112	0.0277	0.00156	3.72	1.48	0	0.0555	0.00818	0.24	17045	7171	3467	1705	16166	6919	2602	1244	6811032	1075465	233076	15694	1004794	177897	202	55179	15492	0	558.69	88.2	19.1	1.29	0.134	0.031	0.00132	4.53
ANODA	5911342	1355899	125101	3297	1307614	80017	96	45084	3201	0	516.86	119	10.9	0.288	0.195	0.0176	0.000339	3.94	0.28	0	0.0311	0.000886	0.396	15242	6094	1203	742	15097	6015	716	421	5627809	1347480	122686	2808	1299911	77906	19	44780	2789	0	525.37	126	11.5	0.262	0.206	0.0183	0.000323	4.18
ANOGA	7037845	1401334	161020	3527	1345310	108505	18	52515	3509	0	538.39	107	12.3	0.27	0.149	0.019	0.00034	4.02	0.268	0	0.042	0.00104	0.343	14808	5449	1566	871	14570	5343	976	512	5788611	1233992	138565	2354	1186916	93843	0	44722	2354	0	561.51	120	13.4	0.228	0.164	0.0201	0.000284	4.34
APIME	5942177	910425	180834	7297	855437	132830	313	48004	6984	0	542.27	83.1	16.5	0.666	0.116	0.0246	0.000635	4.38	0.637	0	0.0577	0.00279	0.284	10595	3947	1690	877	10262	3813	1232	574	5179731	820070	155588	5790	773522	114529	301	41059	5489	0	560.64	88.8	16.8	0.627	0.121	0.0254	0.000593	4.44
APRVF	7194	166	70	0	166	70	0	0	0	0	799.33	18.4	7.78	0	0.0258	0.00647	0	0	0	0	0	0	0	2	2	0	0	2	2	0	0
AQRVC	7609	193	49	0	193	49	0	0	0	0	634.08	16.1	4.08	0	0.0179	0.0055	0	0	0	0	0	0	0	4	2	0	0	4	2	0	0	7609	193	49	0	193	49	0	0	0	0	634.08	16.1	4.08	0	0.0179	0.0055	0	0
AQRVG	7577	319	21	0	319	21	0	0	0	0	631.42	26.6	1.75	0	0.0403	0.00238	0	0	0	0	0	0	0	5	3	0	0	5	3	0	0	7577	319	21	0	319	21	0	0	0	0	631.42	26.6	1.75	0	0.0403	0.00238	0	0
AQUAE	488962	600	13357	0	542	13299	0	58	0	0	314.85	0.386	8.6	0	0.00229	0.0275	0	0.0373	0	0	0.0993	0	0.00546	14	14	110	81	12	12	110	81	473754	600	12889	0	542	12831	0	58	0	0	314.79	0.399	8.56	0	0.00236	0.0276	0	0.0385
ARATH	12988977	1264849	232774	29	1211495	179449	0	53325	29	0	408.36	39.8	7.32	0.000912	0.0906	0.0164	3.75e-06	1.68	0.000912	0	0.0418	2.96e-05	0.233	17602	9595	2154	1411	16954	9335	1502	971	6162071	762279	125159	29	730239	93148	0	32011	29	0	402.17	49.8	8.17	0.00189	0.113	0.018	7.79e-06	2.09
ARCFU	660835	1196	10049	0	1039	9892	0	157	0	0	275.58	0.499	4.19	0	0.0021	0.0168	0	0.0655	0	0	0.127	0	0.017	25	24	75	50	21	20	73	48	607884	1196	9388	0	1039	9231	0	157	0	0	275.93	0.543	4.26	0	0.00229	0.0173	0	0.0713
ASFB7	49803	827	238	0	827	238	0	0	0	0	334.25	5.55	1.6	0	0.0286	0.00355	0	0	0	0	0	0	0	14	13	1	1	14	13	1	1	45275	827	238	0	827	238	0	0	0	0	332.9	6.08	1.75	0	0.0314	0.00389	0	0
ASGVP	2425	84	0	0	84	0	0	0	0	0	1212.5	42	0	0	0.0663	0	0	0	0	0	0	0	NaN	2	2	0	0	2	2	0	0
ASHGO	2330700	266022	44518	0	255507	34003	0	10515	0	0	489.64	55.9	9.35	0	0.103	0.0201	0	2.21	0	0	0.0418	0	0.227	3475	1750	396	275	3377	1707	288	186	2255986	264503	43712	0	254059	33268	0	10444	0	0	491.71	57.7	9.53	0	0.106	0.0204	0	2.28
ASPFU	4742739	771289	74581	210	742240	45639	103	28942	107	0	491.53	79.9	7.73	0.0218	0.142	0.0143	0.000102	3	0.0111	0	0.0341	0.000845	0.361	8497	4086	683	421	8368	4030	343	212	4366533	760470	73249	210	731572	44458	103	28791	107	0	495.3	86.3	8.31	0.0238	0.153	0.0153	0.000111	3.27
ASPVP	3010	215	0	0	215	0	0	0	0	0	602	43	0	0	0.104	0	0	0	0	0	0	0	NaN	1	1	0	0	1	1	0	0
ATV	19264	1366	490	0	1275	399	0	91	0	0	267.56	19	6.81	0	0.025	0.0135	0	1.26	0	0	0.154	0	0.147	9	6	0	0	7	5	0	0	18073	1316	445	0	1249	378	0	67	0	0	265.78	19.4	6.54	0	0.0244	0.0126	0	0.985
BABBO	1850772	124653	25783	0	120255	21385	0	4398	0	0	501.97	33.8	6.99	0	0.0643	0.014	0	1.19	0	0	0.033	0	0.124	1748	1005	196	147	1693	984	155	117	1665251	121512	22563	0	117272	18323	0	4240	0	0	495.61	36.2	6.72	0	0.0675	0.0143	0	1.26
BACAN	1439306	17709	22023	696	14653	19507	156	2516	540	0	262.03	3.22	4.01	0.127	0.0144	0.0148	0.00038	0.458	0.0983	0	0.146	0.0109	0.0652	290	223	139	104	246	189	106	84	1267270	16738	20245	594	13860	17907	54	2338	540	0	259.26	3.42	4.14	0.122	0.0154	0.0152	0.000336	0.478
BACCR	1453967	20866	22209	2284	16212	19782	57	2427	2227	0	277.47	3.98	4.24	0.436	0.0137	0.0161	0.000827	0.463	0.425	0	0.132	0.0417	0.0642	300	230	142	110	248	188	113	89	1267079	18027	20249	1750	14075	18027	20	2222	1730	0	273.43	3.89	4.37	0.378	0.0139	0.0165	0.000657	0.479
BACSU	1230988	17285	18275	0	15869	16859	0	1416	0	0	293.16	4.12	4.35	0	0.0196	0.0161	0	0.337	0	0	0.0838	0	0.0551	302	246	109	88	267	220	93	76	1103278	16384	16834	0	14981	15431	0	1403	0	0	288.67	4.29	4.4	0	0.0209	0.0166	0	0.367
BACTN	1864427	13054	16757	87	12023	15756	57	1001	30	0	389.88	2.73	3.5	0.0182	0.00834	0.00984	1.46e-05	0.209	0.00627	0	0.074	0.0126	0.0463	224	191	89	82	199	172	78	72	1573896	11751	14905	87	10797	13981	57	924	30	0	381.09	2.85	3.61	0.0211	0.00865	0.0102	1.69e-05	0.224
BATDJ	3887913	405032	63302	97	394256	52623	0	10679	97	0	451.56	47	7.35	0.0113	0.0985	0.0171	4.08e-05	1.24	0.0113	0	0.0274	0.000454	0.172	5853	2933	502	365	5705	2886	388	285	3284489	353764	52452	97	344092	42877	0	9575	97	0	480.54	51.8	7.67	0.0142	0.0996	0.0155	5.14e-05	1.4
BAVJK	5924	77	49	0	77	49	0	0	0	0	493.67	6.42	4.08	0	0.0103	0.0152	0	0	0	0	0	0	0	2	2	0	0	2	2	0	0	5924	77	49	0	77	49	0	0	0	0	493.67	6.42	4.08	0	0.0103	0.0152	0	0
BAYMY	3300	33	21	0	33	21	0	0	0	0	1650	16.5	10.5	0	0.00685	0.0118	0	0	0	0	0	0	0	1	1	0	0	1	1	0	0
BBTVA	1023	0	0	0	0	0	0	0	0	0	146.14	0	0	0	0	0	0	0	0	0	NaN	NaN	NaN	0	0	0	0	0	0	0	0
BBWVS	2860	0	0	0	0	0	0	0	0	0	1430	0	0	0	0	0	0	0	0	0	NaN	NaN	NaN	0	0	0	0	0	0	0	0
BCTVC	1196	120	0	0	120	0	0	0	0	0	170.86	17.1	0	0	0.134	0	0	0	0	0	0	0	NaN	3	3	0	0	3	3	0	0
BDVV	2927	76	0	0	76	0	0	0	0	0	585.4	15.2	0	0	0.0756	0	0	0	0	0	0	0	NaN	1	1	0	0	1	1	0	0
BECN1	2435	33	0	0	33	0	0	0	0	0	1217.5	16.5	0	0	0.00747	0	0	0	0	0	0	0	NaN	1	1	0	0	1	1	0	0
BEFVB	4809	30	56	0	13	39	0	17	0	0	400.75	2.5	4.67	0	0.00899	0.0121	0	1.42	0	0	0.567	0	0.304	1	1	0	0	0	0	0	0	4809	30	56	0	13	39	0	17	0	0	400.75	2.5	4.67	0	0.00899	0.0121	0	1.42
BGYMJ	1755	123	0	0	123	0	0	0	0	0	195	13.7	0	0	0.114	0	0	0	0	0	0	0	NaN	3	3	0	0	3	3	0	0
BIFLO	638887	31641	5013	0	30527	3899	0	1114	0	0	370.37	18.3	2.91	0	0.0505	0.00735	0	0.646	0	0	0.0223	0	0.143	515	372	30	21	501	366	14	12	612243	31426	4863	0	30336	3773	0	1090	0	0	369.71	19	2.94	0	0.0524	0.00744	0	0.658
BMV	2275	42	21	0	32	11	0	10	0	0	568.75	10.5	5.25	0	0.0109	0.00546	0	2.5	0	0	0.238	0	0.476	1	1	0	0	1	1	0	0
BNYVS	4291	109	21	0	109	21	0	0	0	0	476.78	12.1	2.33	0	0.0218	0.00338	0	0	0	0	0	0	0	2	2	0	0	2	2	0	0
BOMMO	6003903	871673	128982	5490	836930	99616	113	29366	5377	0	406.3	59	8.73	0.372	0.116	0.018	0.000418	1.99	0.364	0	0.0379	0.00182	0.243	10576	4907	1206	695	10302	4787	874	487	5420915	849510	124343	4225	816801	95858	1	28485	4224	0	428.46	67.1	9.83	0.334	0.128	0.0196	0.000383	2.25
BORBU	381092	4688	11962	0	3496	10770	0	1192	0	0	295.65	3.64	9.28	0	0.0135	0.0335	0	0.925	0	0	0.192	0	0.0612	77	67	100	85	60	54	90	77	310717	3073	6854	0	2375	6156	0	698	0	0	312.59	3.09	6.9	0	0.0112	0.0221	0	0.702
BORPE	1065161	16033	6732	40	15556	6295	0	437	40	0	326.64	4.92	2.06	0.0123	0.0166	0.00596	2.33e-05	0.134	0.0123	0	0.0218	0.00106	0.0405	279	228	40	28	269	222	35	26	959672	15849	6178	40	15372	5741	0	437	40	0	324.43	5.36	2.09	0.0135	0.0182	0.00612	2.57e-05	0.148
BOTVF	2198	350	0	0	350	0	0	0	0	0	1099	175	0	0	0.262	0	0	0	0	0	0	0	NaN	3	2	0	0	3	2	0	0
BOTVX	2351	196	0	0	196	0	0	0	0	0	470.2	39.2	0	0	0.065	0	0	0	0	0	0	0	NaN	4	3	0	0	4	3	0	0
BOVIN	12700801	2081694	377561	33340	1964856	293750	313	83811	33027	0	532.08	87.2	15.8	1.4	0.133	0.0246	0.00159	3.51	1.38	0	0.0427	0.00691	0.242	24287	10194	4123	1961	23352	9924	3065	1444	7675561	1483844	238642	19930	1408065	182662	131	55980	19799	0	580.73	112	18.1	1.51	0.161	0.0265	0.00159	4.24
BPCHP	1648	0	0	0	0	0	0	0	0	0	206	0	0	0	0	0	0	0	0	0	NaN	NaN	NaN	0	0	0	0	0	0	0	0
BPHC1	9882	88	163	0	88	163	0	0	0	0	241.02	2.15	3.98	0	0.00741	0.0269	0	0	0	0	0	0	0	2	2	1	1	2	2	1	1	9882	88	163	0	88	163	0	0	0	0	241.02	2.15	3.98	0	0.00741	0.0269	0	0
BPL2	3273	0	63	0	0	63	0	0	0	0	233.79	0	4.5	0	0	0.0269	0	0	0	0	NaN	NaN	0	0	0	0	0	0	0	0	0	3273	0	63	0	0	63	0	0	0	0	233.79	0	4.5	0	0	0.0269	0	0
BPLC2	6900	100	220	0	83	203	0	17	0	0	176.92	2.56	5.64	0	0.00813	0.0229	0	0.436	0	0	0.141	0	0.0827	3	2	1	1	1	1	0	0	6900	100	220	0	83	203	0	17	0	0	176.92	2.56	5.64	0	0.00813	0.0229	0	0.436
BPM13	1945	162	0	0	162	0	0	0	0	0	216.11	18	0	0	0.0425	0	0	0	0	0	0	0	NaN	3	1	0	0	3	1	0	0
BPML5	15251	649	147	0	649	147	0	0	0	0	179.42	7.64	1.73	0	0.0582	0.00726	0	0	0	0	0	0	0	16	13	1	1	16	13	1	1	15251	649	147	0	649	147	0	0	0	0	179.42	7.64	1.73	0	0.0582	0.00726	0	0
BPMS2	1143	0	0	0	0	0	0	0	0	0	285.75	0	0	0	0	0	0	0	0	0	NaN	NaN	NaN	0	0	0	0	0	0	0	0
BPMU	11133	154	84	0	154	84	0	0	0	0	214.1	2.96	1.62	0	0.0162	0.0072	0	0	0	0	0	0	0	4	4	0	0	4	4	0	0	11133	154	84	0	154	84	0	0	0	0	214.1	2.96	1.62	0	0.0162	0.0072	0	0
BPMX1	1469	0	0	0	0	0	0	0	0	0	367.25	0	0	0	0	0	0	0	0	0	NaN	NaN	NaN	0	0	0	0	0	0	0	0
BPN15	14190	483	252	0	418	187	0	65	0	0	236.5	8.05	4.2	0	0.0336	0.0193	0	1.08	0	0	0.158	0	0.189	9	6	0	0	8	5	0	0	14053	374	252	0	309	187	0	65	0	0	238.19	6.34	4.27	0	0.0207	0.0197	0	1.1
BPN4	22029	651	389	0	607	345	0	44	0	0	305.96	9.04	5.4	0	0.0228	0.0147	0	0.611	0	0	0.0501	0	0.114	11	9	2	2	10	9	1	1	22029	651	389	0	607	345	0	44	0	0	305.96	9.04	5.4	0	0.0228	0.0147	0	0.611
BPP1	28126	833	669	0	781	617	0	52	0	0	255.69	7.57	6.08	0	0.027	0.0203	0	0.473	0	0	0.0869	0	0.0863	19	12	6	6	18	11	5	5	27687	833	627	0	781	575	0	52	0	0	256.36	7.71	5.81	0	0.0275	0.0192	0	0.481
BPP2	10467	314	77	0	314	77	0	0	0	0	243.42	7.3	1.79	0	0.025	0.00502	0	0	0	0	0	0	0	7	7	0	0	7	7	0	0	10376	314	77	0	314	77	0	0	0	0	247.05	7.48	1.83	0	0.0256	0.00514	0	0
BPP22	12419	390	154	0	390	154	0	0	0	0	194.05	6.09	2.41	0	0.0309	0.00941	0	0	0	0	0	0	0	7	6	1	1	7	6	1	1	12419	390	154	0	390	154	0	0	0	0	194.05	6.09	2.41	0	0.0309	0.00941	0	0
BPPH6	3573	0	21	0	0	21	0	0	0	0	274.85	0	1.62	0	0	0.00243	0	0	0	0	NaN	NaN	0	0	0	0	0	0	0	0	0	3573	0	21	0	0	21	0	0	0	0	274.85	0	1.62	0	0	0.00243	0	0
BPPHC	12454	827	112	48	779	112	0	0	48	0	234.98	15.6	2.11	0.906	0.0526	0.00703	0.00147	0	0.906	0	0	0.044	0	15	10	0	0	14	10	0	0	12361	827	112	48	779	112	0	0	48	0	237.71	15.9	2.15	0.923	0.0536	0.00716	0.0015	0
BPPHE	42234	1265	1445	0	1039	1219	0	226	0	0	191.1	5.72	6.54	0	0.0233	0.0429	0	1.02	0	0	0.205	0	0.0907	20	14	14	12	16	11	10	8	41987	1265	1403	0	1039	1177	0	226	0	0	191.72	5.78	6.41	0	0.0236	0.0423	0	1.03
BPPHM	1677	357	56	0	357	56	0	0	0	0	152.45	32.5	5.09	0	0.37	0.022	0	0	0	0	0	0	0	7	6	1	1	7	6	1	1	1677	357	56	0	357	56	0	0	0	0	152.45	32.5	5.09	0	0.37	0.022	0	0
BPPHS	1986	130	0	0	130	0	0	0	0	0	198.6	13	0	0	0.145	0	0	0	0	0	0	0	NaN	3	3	0	0	3	3	0	0	1986	130	0	0	130	0	0	0	0	0	198.6	13	0	0	0.145	0	0	0
BPPM2	3126	0	42	0	0	42	0	0	0	0	148.86	0	2	0	0	0.0204	0	0	0	0	NaN	NaN	0	0	0	0	0	0	0	0	0	3126	0	42	0	0	42	0	0	0	0	148.86	0	2	0	0	0.0204	0	0
BPPRD	4863	195	70	0	195	70	0	0	0	0	162.1	6.5	2.33	0	0.0361	0.0193	0	0	0	0	0	0	0	4	2	0	0	4	2	0	0	4809	195	70	0	195	70	0	0	0	0	165.83	6.72	2.41	0	0.0374	0.02	0	0
BPSPB	38336	428	1214	0	416	1202	0	12	0	0	207.22	2.31	6.56	0	0.00602	0.0246	0	0.0649	0	0	0.0526	0	0.00101	8	6	8	5	7	5	8	5	38336	428	1214	0	416	1202	0	12	0	0	207.22	2.31	6.56	0	0.00602	0.0246	0	0.0649
BPT4	53409	818	649	0	783	614	0	35	0	0	195.64	3	2.38	0	0.0118	0.0158	0	0.128	0	0	0.0594	0	0.0675	19	13	5	5	18	12	5	5	52661	818	649	0	783	614	0	35	0	0	197.23	3.06	2.43	0	0.0121	0.0161	0	0.131
BPT5	32457	542	716	0	491	665	0	51	0	0	200.35	3.35	4.42	0	0.0152	0.0252	0	0.315	0	0	0.0903	0	0.101	10	10	5	5	9	9	4	4	32287	542	716	0	491	665	0	51	0	0	200.54	3.37	4.45	0	0.0153	0.0254	0	0.317
BPT7	12933	572	133	0	532	93	0	40	0	0	230.95	10.2	2.38	0	0.0682	0.0197	0	0.714	0	0	0.0419	0	0.19	10	9	0	0	10	9	0	0	12458	572	133	0	532	93	0	40	0	0	230.7	10.6	2.46	0	0.0707	0.0204	0	0.741
BPV3	2462	320	60	0	296	36	0	24	0	0	307.75	40	7.5	0	0.15	0.0386	0	3	0	0	0.0721	0	0.308	3	3	1	1	3	3	0	0
BPV5	2305	107	21	0	107	21	0	0	0	0	384.17	17.8	3.5	0	0.0436	0.00559	0	0	0	0	0	0	0	2	1	0	0	2	1	0	0
BRADI	12772608	1448814	186414	0	1406154	143754	0	42660	0	0	426.58	48.4	6.23	0	0.114	0.014	0	1.42	0	0	0.0276	0	0.227	20037	11173	1670	1134	19609	10990	1136	727	6782649	979144	114069	0	951458	86383	0	27686	0	0	433.29	62.5	7.29	0	0.145	0.0157	0	1.77
BRAFL	13248417	1883276	257087	15712	1779934	168987	470	88100	15242	0	464.14	66	9.01	0.55	0.119	0.0178	0.00139	3.09	0.534	0	0.0468	0.0098	0.294	20621	9804	2576	1594	19755	9451	1478	1009	8904304	1556802	198067	9326	1474426	124735	282	73332	9044	0	533.06	93.2	11.9	0.558	0.155	0.0215	0.00111	4.39
BRAJA	2616478	71749	17209	0	69874	15334	0	1875	0	0	317.03	8.69	2.09	0	0.0316	0.00653	0	0.227	0	0	0.0181	0	0.0752	1223	933	92	75	1188	921	67	60	2257987	65979	15367	0	64291	13679	0	1688	0	0	316.91	9.26	2.16	0	0.0332	0.00683	0	0.237
BRV1	13577	102	0	0	102	0	0	0	0	0	2262.83	17	0	0	0.102	0	0	0	0	0	0	0	NaN	1	1	0	0	1	1	0	0
BSMV	3148	207	21	0	207	21	0	0	0	0	449.71	29.6	3	0	0.0704	0.0196	0	0	0	0	0	0	0	2	2	0	0	2	2	0	0
BSNV	2075	390	21	0	370	1	0	20	0	0	691.67	130	7	0	0.228	0.00655	0	6.67	0	0	0.0332	0	0.952	9	3	0	0	9	3	0	0
BSTV1	3093	42	49	0	42	49	0	0	0	0	3093	42	49	0	0.0136	0.0158	0	0	0	0	0	0	0	1	1	0	0	1	1	0	0
BTV10	6470	451	21	0	451	21	0	0	0	0	588.18	41	1.91	0	0.123	0.00212	0	0	0	0	0	0	0	6	3	0	0	6	3	0	0	6145	288	21	0	288	21	0	0	0	0	614.5	28.8	2.1	0	0.0855	0.00233	0	0
BUCAI	188274	455	1326	0	394	1265	0	61	0	0	329.15	0.795	2.32	0	0.00299	0.00859	0	0.107	0	0	0.189	0	0.0241	10	8	3	3	8	6	2	2	187955	455	1326	0	394	1265	0	61	0	0	329.75	0.798	2.33	0	0.003	0.00862	0	0.107
BUNL8	4031	0	21	0	0	21	0	0	0	0	1007.75	0	5.25	0	0	0.00232	0	0	0	0	NaN	NaN	0	0	0	0	0	0	0	0	0
BUNYW	4005	0	0	0	0	0	0	0	0	0	1001.25	0	0	0	0	0	0	0	0	0	NaN	NaN	NaN	0	0	0	0	0	0	0	0
BURPS	1988282	56682	12695	299	55417	11687	42	1008	257	0	347.78	9.91	2.22	0.0523	0.0307	0.00688	0.000104	0.176	0.045	0	0.0144	0.00529	0.0492	916	679	60	48	894	665	51	43	1757764	53304	11235	299	52067	10255	42	980	257	0	343.78	10.4	2.2	0.0585	0.0326	0.00678	0.000116	0.192
BVDVN	3988	76	0	0	76	0	0	0	0	0	3988	76	0	0	0.0191	0	0	0	0	0	0	0	NaN	2	1	0	0	2	1	0	0
BVY3	3491	185	0	0	185	0	0	0	0	0	3491	185	0	0	0.053	0	0	0	0	0	0	0	NaN	2	1	0	0	2	1	0	0
BYDVP	1988	332	46	0	332	46	0	0	0	0	331.33	55.3	7.67	0	0.173	0.00884	0	0	0	0	0	0	0	7	3	0	0	7	3	0	0
BYVU	5076	33	21	0	33	21	0	0	0	0	634.5	4.12	2.62	0	0.00133	0.000848	0	0	0	0	0	0	0	1	1	0	0	1	1	0	0
CAEBR	8656306	1196141	198143	23536	1107303	132004	837	66139	22699	0	398.91	55.1	9.13	1.08	0.119	0.0197	0.00309	3.05	1.05	0	0.0548	0.0141	0.304	13688	7071	1887	1178	13097	6765	1071	680	7176768	1075350	173993	10483	1006078	114650	554	59343	9929	0	424.11	63.5	10.3	0.619	0.127	0.0217	0.00157	3.51
CAEEL	11023695	1565326	253433	25841	1449836	163102	682	90331	25159	0	438.27	62.2	10.1	1.03	0.114	0.0181	0.00299	3.59	1	0	0.0525	0.0137	0.32	17574	8327	2473	1352	16789	8002	1396	761	6735548	940308	154909	9379	878494	102173	301	52736	9078	0	430.17	60.1	9.89	0.599	0.116	0.0195	0.00157	3.37
CAEJA	10583859	1362637	240491	29531	1259403	166313	475	74178	29056	0	301.85	38.9	6.86	0.842	0.12	0.0185	0.00274	2.12	0.829	0	0.0508	0.0134	0.288	17336	10481	2180	1467	16569	9999	1349	918	5945410	851981	144534	9416	792476	94356	89	50178	9327	0	346.41	49.6	8.42	0.549	0.127	0.0203	0.00156	2.92
CALJA	21481571	3669005	671295	63183	3455892	520704	661	150591	62522	0	511.3	87.3	16	1.5	0.146	0.0273	0.00173	3.58	1.49	0	0.0441	0.00736	0.243	43778	18777	7393	3622	42067	18249	5509	2698	7946020	1486016	237081	21029	1410860	182748	206	54333	20823	0	545.71	102	16.3	1.44	0.161	0.0259	0.00162	3.73
CAMJE	507643	4254	10076	0	3673	9495	0	581	0	0	312.78	2.62	6.21	0	0.0122	0.0221	0	0.358	0	0	0.115	0	0.0383	72	56	68	59	68	51	60	51	493410	4058	9901	0	3477	9320	0	581	0	0	311.69	2.56	6.25	0	0.0121	0.0224	0	0.367
CAMVS	2303	249	56	0	249	56	0	0	0	0	383.83	41.5	9.33	0	0.0821	0.0436	0	0	0	0	0	0	0	4	2	0	0	4	2	0	0
CANAL	3836333	580516	83560	57	550484	53528	57	30032	0	0	421.16	63.7	9.17	0.00626	0.119	0.0184	4.57e-05	3.3	0	0	0.059	0.000552	0.342	6618	3224	764	542	6460	3116	417	270	2934833	442980	65358	0	419948	42326	0	23032	0	0	420.7	63.5	9.37	0	0.116	0.0186	0	3.3
CANFA	15284263	2864366	490472	47799	2701957	375453	409	115019	47390	0	578.49	108	18.6	1.81	0.162	0.0274	0.00174	4.35	1.79	0	0.0436	0.0061	0.261	31896	12871	5528	2489	30742	12558	4078	1807	8119522	1707237	250847	19286	1626758	189527	127	61320	19159	0	581.59	122	18	1.38	0.191	0.0272	0.00145	4.39
CARMS	1256	40	0	0	40	0	0	0	0	0	314	10	0	0	0.164	0	0	0	0	0	0	0	NaN	1	1	0	0	1	1	0	0
CAUCR	1205709	33819	7616	0	33261	7058	0	558	0	0	324.12	9.09	2.05	0	0.0396	0.00638	0	0.15	0	0	0.0161	0	0.0567	561	427	45	39	548	422	37	32	1139715	32799	7224	0	32265	6690	0	534	0	0	322.96	9.29	2.05	0	0.0402	0.0065	0	0.151
CAVC1	786	197	0	0	197	0	0	0	0	0	262	65.7	0	0	0.39	0	0	0	0	0	0	0	NaN	4	3	0	0	4	3	0	0
CAVPO	10375650	1531529	279764	28336	1448816	225076	311	54688	28025	0	521.13	76.9	14.1	1.42	0.12	0.0226	0.00151	2.75	1.41	0	0.0385	0.00656	0.21	18959	7993	3022	1488	18255	7801	2349	1168	7159812	1215481	209464	17173	1157183	168181	158	41283	17015	0	558.27	94.8	16.3	1.34	0.142	0.0251	0.00128	3.22
CCHFI	6111	234	63	0	234	63	0	0	0	0	2037	78	21	0	0.0463	0.0181	0	0	0	0	0	0	0	1	1	0	0	1	1	0	0
CENSY	623942	26147	3690	191	25207	2941	0	749	191	0	308.58	12.9	1.82	0.0945	0.0408	0.0078	0.000202	0.37	0.0945	0	0.0348	0.00206	0.171	421	255	20	16	411	248	11	10	552340	22246	3226	191	21412	2583	0	643	191	0	303.15	12.2	1.77	0.105	0.0403	0.00702	0.000224	0.353
CFMVN	1872	246	0	0	246	0	0	0	0	0	468	61.5	0	0	0.132	0	0	0	0	0	0	0	NaN	4	3	0	0	4	3	0	0
CHICK	9823606	1457564	330073	31735	1350677	254272	649	75801	31086	0	557.4	82.7	18.7	1.8	0.125	0.028	0.00182	4.3	1.76	0	0.053	0.00822	0.249	17940	7498	3531	1658	17136	7271	2631	1203	6509004	1068353	224695	17211	999798	172838	513	51857	16698	0	573.43	94.1	19.8	1.52	0.139	0.029	0.00145	4.57
CHIKS	3722	105	28	0	105	28	0	0	0	0	1861	52.5	14	0	0.0421	0.00566	0	0	0	0	0	0	0	1	1	0	0	1	1	0	0
CHLAA	1405705	25887	14021	21	25168	13323	0	698	21	0	365.12	6.72	3.64	0.00545	0.0158	0.0098	1.05e-05	0.181	0.00545	0	0.0252	0.000238	0.0262	389	291	102	80	382	282	95	74	1319664	24308	12464	21	23742	11919	0	545	21	0	367.8	6.77	3.47	0.00585	0.0156	0.00945	1.13e-05	0.152
CHLRE	6548670	1080879	130646	114	1043622	93437	66	37209	48	0	456.77	75.4	9.11	0.00795	0.132	0.0173	4.74e-05	2.6	0.00335	0	0.0339	8.28e-05	0.288	14647	6038	1307	697	14154	5921	835	452	5809459	1035757	122266	114	999968	86525	66	35741	48	0	481.91	85.9	10.1	0.00946	0.146	0.0188	5.64e-05	2.96
CHLTE	631563	7060	6559	0	6670	6169	0	390	0	0	280.69	3.14	2.92	0	0.0187	0.00915	0	0.173	0	0	0.0611	0	0.0589	144	123	46	31	131	112	42	27	612798	6920	6345	0	6530	5955	0	390	0	0	280.97	3.17	2.91	0	0.0186	0.00912	0	0.179
CHLTR	312168	6725	3951	0	6532	3758	0	193	0	0	348.79	7.51	4.41	0	0.0221	0.0148	0	0.216	0	0	0.0508	0	0.0299	107	61	22	20	102	58	22	20	311200	6725	3951	0	6532	3758	0	193	0	0	349.66	7.56	4.44	0	0.0222	0.0149	0	0.217
CHPVE	3787	31	0	0	31	0	0	0	0	0	1893.5	15.5	0	0	0.0049	0	0	0	0	0	0	0	NaN	1	1	0	0	1	1	0	0
CILVC	3953	64	21	0	64	21	0	0	0	0	658.83	10.7	3.5	0	0.0406	0.0164	0	0	0	0	0	0	0	1	1	0	0	1	1	0	0
CIOIN	5767451	616771	144957	9519	566617	104043	279	40914	9240	0	333.22	35.6	8.38	0.55	0.103	0.021	0.00085	2.36	0.534	0	0.0621	0.00586	0.266	8215	4623	1544	857	7568	4419	982	595	4787876	574291	124198	5091	533516	88348	166	35850	4925	0	325.64	39.1	8.45	0.346	0.115	0.0221	0.000623	2.44
CIOSA	9644552	717543	218353	41024	629872	171243	463	47110	40561	0	482.13	35.9	10.9	2.05	0.0958	0.0199	0.00206	2.36	2.03	0	0.0678	0.0106	0.212	9322	5512	2268	1130	8507	5213	1612	849	3842061	428824	89545	4231	400830	65657	125	23888	4106	0	361.98	40.4	8.44	0.399	0.132	0.0216	0.000601	2.25
CLBVS	2687	31	21	0	31	21	0	0	0	0	895.67	10.3	7	0	0.0285	0.0193	0	0	0	0	0	0	0	1	1	0	0	1	1	0	0
CLOAB	1176635	6346	17022	0	5533	16209	0	813	0	0	305.86	1.65	4.42	0	0.00576	0.0145	0	0.211	0	0	0.0935	0	0.0251	114	92	123	93	99	82	109	87	1062185	6058	15650	0	5275	14867	0	783	0	0	303.39	1.73	4.47	0	0.00609	0.0145	0	0.224
CLOBH	1052452	6769	19554	0	5548	18333	0	1221	0	0	293.16	1.89	5.45	0	0.00929	0.0184	0	0.34	0	0	0.143	0	0.037	123	107	122	101	100	90	107	89	954990	6643	18401	0	5422	17180	0	1221	0	0	291.87	2.03	5.62	0	0.00995	0.0187	0	0.373
CMVFN	2457	112	0	0	112	0	0	0	0	0	491.4	22.4	0	0	0.0457	0	0	0	0	0	0	0	NaN	3	3	0	0	3	3	0	0
COCIM	4212036	780439	70871	0	751357	41789	0	29082	0	0	433.96	80.4	7.3	0	0.158	0.0158	0	3	0	0	0.0392	0	0.382	8867	4338	646	423	8652	4234	297	200	3936947	759255	65971	0	732323	39039	0	26932	0	0	442.35	85.3	7.41	0	0.165	0.0147	0	3.03
COPC7	6160676	1265954	103072	40	1225275	62433	0	40639	40	0	461.99	94.9	7.73	0.003	0.174	0.0143	4.68e-06	3.05	0.003	0	0.0287	2.61e-05	0.357	13118	6237	974	686	12919	6164	512	362	5181052	1192637	94680	40	1153718	55801	0	38879	40	0	468.7	108	8.57	0.00362	0.195	0.0156	5.65e-06	3.52
COPV6	2357	270	42	0	270	42	0	0	0	0	336.71	38.6	6	0	0.188	0.0128	0	0	0	0	0	0	0	3	3	0	0	3	3	0	0
CORGL	958275	29125	7200	236	27365	5635	41	1565	195	0	309.82	9.42	2.33	0.0763	0.0325	0.0074	0.000121	0.506	0.063	0	0.0354	0.00362	0.15	479	365	51	37	440	351	29	26	914103	28188	6916	236	26470	5393	41	1523	195	0	311.56	9.61	2.36	0.0804	0.0333	0.00733	0.000127	0.519
COXBU	512702	5636	6328	0	5179	5871	0	457	0	0	282.48	3.11	3.49	0	0.0216	0.0119	0	0.252	0	0	0.0656	0	0.0711	107	94	51	39	99	88	46	35	500484	5424	6286	0	4967	5829	0	457	0	0	285.5	3.09	3.59	0	0.0195	0.0123	0	0.261
COYMV	2221	279	165	0	251	137	0	28	0	0	740.33	93	55	0	0.0493	0.145	0	9.33	0	0	0.1	0	0.0915	4	1	3	2	5	1	3	2
CPMV1	809	0	0	0	0	0	0	0	0	0	809	0	0	0	0	0	0	0	0	0	NaN	NaN	NaN	0	0	0	0	0	0	0	0
CPMVS	4802	0	21	0	0	21	0	0	0	0	960.4	0	4.2	0	0	0.00225	0	0	0	0	NaN	NaN	0	0	0	0	0	0	0	0	0
CPRVZ	473	0	0	0	0	0	0	0	0	0	473	0	0	0	0	0	0	0	0	0	NaN	NaN	NaN	0	0	0	0	0	0	0	0
CPSVP	3537	0	91	0	0	91	0	0	0	0	884.25	0	22.8	0	0	0.0281	0	0	0	0	NaN	NaN	0	0	0	0	0	0	0	0	0
CPVKS	843	35	0	0	35	0	0	0	0	0	421.5	17.5	0	0	0.0549	0	0	0	0	0	0	0	NaN	1	1	0	0	1	1	0	0
CRLVP	3210	0	0	0	0	0	0	0	0	0	1605	0	0	0	0	0	0	0	0	0	NaN	NaN	NaN	0	0	0	0	0	0	0	0
CRPVC	2666	35	63	0	35	63	0	0	0	0	1333	17.5	31.5	0	0.00988	0.0178	0	0	0	0	0	0	0	1	1	0	0	1	1	0	0
CRPVK	2669	342	21	0	342	21	0	0	0	0	333.62	42.8	2.62	0	0.117	0.00673	0	0	0	0	0	0	0	4	3	0	0	4	3	0	0
CRYHO	1757638	134387	40023	40	126282	31958	0	8065	40	0	452.3	34.6	10.3	0.0103	0.0678	0.0237	1.19e-05	2.08	0.0103	0	0.0614	8e-05	0.171	1792	975	375	250	1691	935	270	177	1740721	133583	39703	40	125566	31726	0	7977	40	0	454.97	34.9	10.4	0.0105	0.0682	0.0239	1.21e-05	2.08
CRYNJ	3446667	773308	64757	25	744008	35482	0	29275	25	0	535.53	120	10.1	0.00388	0.191	0.0168	3.46e-06	4.55	0.00388	0	0.038	1.17e-05	0.453	8099	3421	617	392	7994	3372	275	161	3187825	745630	61950	25	717212	33557	0	28393	25	0	543.44	127	10.6	0.00426	0.2	0.0175	3.8e-06	4.84
CSVMV	2541	89	188	0	58	157	0	31	0	0	508.2	17.8	37.6	0	0.013	0.0486	0	6.2	0	0	0.348	0	0.0876	1	1	1	1	1	1	0	0
CTFVL	9623	461	49	0	461	49	0	0	0	0	740.23	35.5	3.77	0	0.0659	0.00541	0	0	0	0	0	0	0	7	5	0	0	7	5	0	0	9286	461	49	0	461	49	0	0	0	0	773.83	38.4	4.08	0	0.0714	0.00586	0	0
CVH22	12928	189	21	0	189	21	0	0	0	0	1616	23.6	2.62	0	0.0607	0.00224	0	0	0	0	0	0	0	2	1	0	0	2	1	0	0
CVHSA	14377	410	28	0	410	28	0	0	0	0	958.47	27.3	1.87	0	0.0502	0.00149	0	0	0	0	0	0	0	6	3	0	0	6	3	0	0	9995	360	28	0	360	28	0	0	0	0	713.93	25.7	2	0	0.053	0.00159	0	0
CVMA5	14869	355	91	0	355	91	0	0	0	0	1351.73	32.3	8.27	0	0.0432	0.00406	0	0	0	0	0	0	0	8	3	0	0	8	3	0	0	10401	279	70	0	279	70	0	0	0	0	1040.1	27.9	7	0	0.0458	0.00399	0	0
DANRE	20446653	3238256	647612	57476	2986166	452602	395	195009	57080	0	501.82	79.5	15.9	1.41	0.131	0.0274	0.00171	4.79	1.4	0	0.0637	0.00704	0.285	37883	16599	6886	3461	35571	15840	4512	2362	8212303	1613389	271946	21165	1505864	185436	150	86510	21015	0	563.99	111	18.7	1.45	0.159	0.0286	0.00177	5.94
DAPPU	9947364	1309802	201221	14836	1239640	145778	117	55443	14719	0	330.07	43.5	6.68	0.492	0.122	0.0174	0.0015	1.84	0.488	0	0.0402	0.00664	0.268	17208	9364	1841	1284	16571	9089	1214	841	6738843	982879	137698	7359	938667	100747	98	36951	7261	0	372.93	54.4	7.62	0.407	0.131	0.0171	0.00093	2.04
DEIRA	949308	38671	7112	25	37278	5744	0	1368	25	0	307.72	12.5	2.31	0.0081	0.0444	0.00713	1.92e-05	0.443	0.0081	0	0.022	0.000699	0.105	640	518	38	28	628	508	21	19	904498	38248	6937	25	36887	5601	0	1336	25	0	307.86	13	2.36	0.00851	0.046	0.00729	2.01e-05	0.455
DEN1W	3392	0	0	0	0	0	0	0	0	0	3392	0	0	0	0	0	0	0	0	0	NaN	NaN	NaN	0	0	0	0	0	0	0	0
DESVH	1075413	37862	10038	32	37050	9258	0	780	32	0	305.78	10.8	2.85	0.0091	0.0381	0.00945	3.27e-05	0.222	0.0091	0	0.0171	0.000263	0.0504	605	481	62	59	582	476	49	47	1014195	37031	9181	32	36349	8531	0	650	32	0	305.76	11.2	2.77	0.00965	0.0398	0.00938	3.47e-05	0.196
DHBVQ	1685	455	28	0	427	0	0	28	0	0	421.25	114	7	0	0.278	0.00888	0	7	0	0	0.0352	0	1	6	4	0	0	5	4	0	0
DICDI	6860265	1299903	278021	318	1148498	126932	2	151089	316	0	538.31	102	21.8	0.025	0.15	0.0347	1.88e-05	11.9	0.0248	0	0.123	0.000109	0.503	12546	5610	2933	1898	12347	5255	1028	713	5823568	1251488	262718	318	1105359	116905	2	145813	316	0	563.32	121	25.4	0.0308	0.171	0.0389	2.32e-05	14.1
DICTD	571687	754	10088	0	692	10026	0	62	0	0	327.99	0.433	5.79	0	0.00262	0.0178	0	0.0356	0	0	0.0819	0	0.00894	16	15	58	42	14	13	57	41	538801	754	9749	0	692	9687	0	62	0	0	326.35	0.457	5.9	0	0.00276	0.018	0	0.0376
DPV83	51100	684	232	0	606	154	0	78	0	0	309.7	4.15	1.41	0	0.018	0.00501	0	0.473	0	0	0.133	0	0.3	13	9	0	0	11	8	0	0	51100	684	232	0	606	154	0	78	0	0	309.7	4.15	1.41	0	0.018	0.00501	0	0.473
DROME	12848190	3057701	359000	6109	2926300	233636	72	125364	6037	0	651.5	155	18.2	0.31	0.177	0.0223	0.000325	6.36	0.306	0	0.042	0.00119	0.397	32227	9802	3438	1770	31937	9643	2100	1017	6765333	1529660	166348	2043	1468112	106800	43	59548	2000	0	563.97	128	13.9	0.17	0.169	0.021	0.000186	4.96
DROPS	8423158	1875359	201656	4603	1794275	124943	232	76713	4371	0	502.7	112	12	0.275	0.179	0.0197	0.000355	4.58	0.261	0	0.0383	0.00129	0.396	20571	7688	1932	1126	20382	7573	1018	594	6729491	1570838	164195	1933	1505880	100992	178	63203	1755	0	522.68	122	12.8	0.15	0.191	0.0207	0.000231	4.91
DUGBA	6070	170	24	0	170	24	0	0	0	0	2023.33	56.7	8	0	0.0197	0.00198	0	0	0	0	0	0	0	2	2	0	0	2	2	0	0
DXV96	2266	279	21	0	279	21	0	0	0	0	755.33	93	7	0	0.26	0.00678	0	0	0	0	0	0	0	4	3	0	0	4	3	0	0
EAVBU	4311	166	0	0	166	0	0	0	0	0	538.88	20.8	0	0	0.0778	0	0	0	0	0	0	0	NaN	3	2	0	0	3	2	0	0
EBLV1	3602	54	21	0	54	21	0	0	0	0	720.4	10.8	4.2	0	0.0362	0.0141	0	0	0	0	0	0	0	1	1	0	0	1	1	0	0
EBLV2	3601	93	0	0	93	0	0	0	0	0	720.2	18.6	0	0	0.0626	0	0	0	0	0	0	0	NaN	2	1	0	0	2	1	0	0
EBOZM	5494	623	52	0	623	52	0	0	0	0	610.44	69.2	5.78	0	0.111	0.00501	0	0	0	0	0	0	0	7	6	0	0	7	6	0	0
EBVA8	40146	7867	297	0	7765	195	0	102	0	0	501.82	98.3	3.71	0	0.181	0.00822	0	1.27	0	0	0.00762	0	0.382	73	38	2	2	71	38	1	1	39801	7673	276	0	7592	195	0	81	0	0	503.81	97.1	3.49	0	0.176	0.00756	0	1.03
EBVB9	55127	17441	297	0	17339	195	0	102	0	0	467.18	148	2.52	0	0.331	0.00558	0	0.864	0	0	0.00436	0	0.382	121	67	2	2	117	67	1	1	42753	9810	276	0	9729	195	0	81	0	0	491.41	113	3.17	0	0.217	0.00687	0	0.931
ECOLI	1355945	13891	11407	0	13049	10565	0	842	0	0	315.12	3.23	2.65	0	0.0114	0.00994	0	0.196	0	0	0.0464	0	0.0423	224	179	58	47	217	172	49	41	1224993	13470	10334	0	12628	9492	0	842	0	0	314.58	3.46	2.65	0	0.012	0.00961	0	0.216
EHV2	36509	4899	200	0	4871	172	0	28	0	0	474.14	63.6	2.6	0	0.117	0.00246	0	0.364	0	0	0.00432	0	0.333	45	27	2	2	45	27	2	2	36173	4693	179	0	4679	165	0	14	0	0	475.96	61.8	2.36	0	0.111	0.00167	0	0.184
EMARV	3485	0	0	0	0	0	0	0	0	0	871.25	0	0	0	0	0	0	0	0	0	NaN	NaN	NaN	0	0	0	0	0	0	0	0
EMCVR	2420	0	28	0	0	28	0	0	0	0	1210	0	14	0	0	0.00611	0	0	0	0	NaN	NaN	0	0	0	0	0	0	0	0	0
EMENI	5089040	791585	76139	170	760994	45718	0	30421	170	0	482.14	75	7.21	0.0161	0.139	0.0137	3.73e-05	2.88	0.0161	0	0.0359	9.64e-05	0.36	8839	4354	703	450	8701	4278	325	218	4616803	777790	73360	170	748208	43948	0	29412	170	0	485.01	81.7	7.71	0.0179	0.151	0.0144	4.13e-05	3.09
ENCCU	692194	23779	13963	0	22148	12332	0	1631	0	0	344.72	11.8	6.95	0	0.0367	0.0198	0	0.812	0	0	0.0625	0	0.0994	356	267	123	81	342	255	101	61	657181	20743	12747	0	19683	11687	0	1060	0	0	345.7	10.9	6.71	0	0.0344	0.0196	0	0.558
ENTFA	953522	23218	15792	85	20823	13482	0	2310	85	0	294.3	7.17	4.87	0.0262	0.0209	0.0163	9.21e-05	0.713	0.0262	0	0.0819	0.00351	0.0781	325	240	118	86	299	222	83	68	865009	18872	14273	85	17114	12600	0	1673	85	0	293.52	6.4	4.84	0.0288	0.0195	0.0168	0.000101	0.568
ENTHI	3380165	192410	122387	0	158029	88006	0	34381	0	0	424.7	24.2	15.4	0	0.0589	0.0354	0	4.32	0	0	0.157	0	0.202	2449	1654	1191	786	2074	1440	802	558	2705099	161437	105039	0	130685	74287	0	30752	0	0	448.53	26.8	17.4	0	0.0601	0.038	0	5.1
FCVUR	2537	0	21	0	0	21	0	0	0	0	845.67	0	7	0	0	0.066	0	0	0	0	NaN	NaN	0	0	0	0	0	0	0	0	0
FDVS	9186	189	91	0	189	91	0	0	0	0	765.5	15.8	7.58	0	0.0167	0.0084	0	0	0	0	0	0	0	3	2	1	1	3	2	1	1	9186	189	91	0	189	91	0	0	0	0	765.5	15.8	7.58	0	0.0167	0.0084	0	0
FIPV	9371	174	0	0	174	0	0	0	0	0	937.1	17.4	0	0	0.0351	0	0	0	0	0	0	0	NaN	2	2	0	0	2	2	0	0	9371	174	0	0	174	0	0	0	0	0	937.1	17.4	0	0	0.0351	0	0	0
FLAPJ	805943	5287	9466	0	4089	8268	0	1198	0	0	333.03	2.18	3.91	0	0.00642	0.0116	0	0.495	0	0	0.108	0	0.0416	91	68	53	38	76	61	43	35	783362	5103	9279	0	3905	8081	0	1198	0	0	334.77	2.18	3.97	0	0.00647	0.0118	0	0.512
FOWPN	80735	1442	813	0	1442	813	0	0	0	0	321.65	5.75	3.24	0	0.0129	0.0114	0	0	0	0	0	0	0	22	11	3	3	22	11	3	3	74901	1274	736	0	1274	736	0	0	0	0	305.72	5.2	3	0	0.0128	0.0116	0	0
FRATT	473408	2777	5006	0	2561	4790	0	216	0	0	309.82	1.82	3.28	0	0.00934	0.0113	0	0.141	0	0	0.0593	0	0.0286	54	48	28	25	51	46	26	24	465207	2777	4892	0	2561	4676	0	216	0	0	310.34	1.85	3.26	0	0.00952	0.0113	0	0.144
FRG3G	28355	2938	195	45	2831	133	0	62	45	0	289.34	30	1.99	0.459	0.114	0.00728	0.0085	0.633	0.459	0	0.0531	0.0309	0.25	42	27	1	1	39	24	0	0	28355	2938	195	45	2831	133	0	62	45	0	289.34	30	1.99	0.459	0.114	0.00728	0.0085	0.633
FUSNN	641087	3212	13059	0	2671	12518	0	541	0	0	313.34	1.57	6.38	0	0.00654	0.0224	0	0.264	0	0	0.17	0	0.023	64	52	83	62	51	42	77	58	596044	3009	12352	0	2468	11811	0	541	0	0	312.88	1.58	6.48	0	0.00697	0.0226	0	0.284
GAHVM	42491	3659	158	0	3612	111	0	47	0	0	472.12	40.7	1.76	0	0.082	0.00537	0	0.522	0	0	0.0149	0	0.168	41	21	2	2	41	21	1	1	42102	3585	126	0	3538	79	0	47	0	0	483.93	41.2	1.45	0	0.0792	0.00319	0	0.54
GASAC	13490632	1815881	371165	45453	1672448	272863	322	98302	45131	0	495.11	66.6	13.6	1.67	0.121	0.0237	0.00168	3.61	1.66	0	0.0508	0.00794	0.245	22725	10725	3965	2028	21298	10389	2686	1484	6849569	1168804	196165	19833	1092298	139364	128	56801	19705	0	520.88	88.9	14.9	1.51	0.16	0.0244	0.00152	4.32
GEOSL	1142096	15136	13237	0	14299	12400	0	837	0	0	335.71	4.45	3.89	0	0.0158	0.0123	0	0.246	0	0	0.0527	0	0.0398	263	222	103	86	247	208	92	80	1065464	13995	12056	0	13212	11273	0	783	0	0	336.21	4.42	3.8	0	0.0159	0.0122	0	0.247
GFKVM	2645	454	0	0	454	0	0	0	0	0	661.25	114	0	0	0.385	0	0	0	0	0	0	0	NaN	5	3	0	0	5	3	0	0
GIAIC	3226528	218150	90662	36	209234	81746	36	8916	0	0	451.01	30.5	12.7	0.00503	0.0663	0.0199	9.93e-06	1.25	0	0	0.0357	0.000486	0.111	3604	1763	1000	485	3425	1719	861	432	3003904	211561	88986	36	202775	80200	36	8786	0	0	465.58	32.8	13.8	0.00558	0.0673	0.0214	1.1e-05	1.36
GIBZE	5835308	950940	83920	85	913377	46411	31	37509	54	0	445.31	72.6	6.4	0.00649	0.143	0.013	2.99e-05	2.86	0.00412	0	0.0338	0.000288	0.379	10155	5275	720	494	9986	5194	271	213	5411408	937162	82390	85	899818	45100	31	37290	54	0	446.78	77.4	6.8	0.00702	0.152	0.0138	3.23e-05	3.08
GLOVI	1377677	30467	13784	0	29232	12549	0	1235	0	0	312.68	6.91	3.13	0	0.0247	0.0109	0	0.28	0	0	0.0547	0	0.0743	470	377	108	95	444	356	89	79	1172232	28174	10996	0	27198	10020	0	976	0	0	306.63	7.37	2.88	0	0.0264	0.0102	0	0.255
GLRV3	7560	424	0	0	424	0	0	0	0	0	581.54	32.6	0	0	0.0132	0	0	0	0	0	0	0	NaN	4	2	0	0	4	2	0	0	5327	212	0	0	212	0	0	0	0	0	443.92	17.7	0	0	0.00637	0	0	0
GLVWB	2793	114	0	0	114	0	0	0	0	0	1396.5	57	0	0	0.0471	0	0	0	0	0	0	0	NaN	2	2	0	0	2	2	0	0
GORGO	14626901	2512362	436178	41323	2373117	337758	498	98420	40825	0	536.06	92.1	16	1.51	0.145	0.0254	0.0015	3.61	1.5	0	0.0433	0.00609	0.249	29523	12251	4691	2255	28359	11918	3525	1699	7902214	1499471	233839	21044	1424025	179199	238	54640	20806	0	537.42	102	15.9	1.43	0.16	0.0252	0.00143	3.72
GRVMC	1350	233	0	0	233	0	0	0	0	0	450	77.7	0	0	0.308	0	0	0	0	0	0	0	NaN	3	2	0	0	3	2	0	0
GVAIS	2450	0	0	0	0	0	0	0	0	0	490	0	0	0	0	0	0	0	0	0	NaN	NaN	NaN	0	0	0	0	0	0	0	0
GVCPM	36936	1330	915	0	1197	782	0	133	0	0	258.29	9.3	6.4	0	0.0491	0.0211	0	0.93	0	0	0.0813	0	0.136	17	15	7	4	15	14	6	3	36672	1330	915	0	1197	782	0	133	0	0	260.09	9.43	6.49	0	0.0498	0.0214	0	0.943
HAEIN	527691	5466	6214	0	4694	5442	0	772	0	0	309.13	3.2	3.64	0	0.00948	0.0132	0	0.452	0	0	0.122	0	0.0676	87	68	44	39	73	61	34	31	514348	5213	6172	0	4441	5400	0	772	0	0	308.92	3.13	3.71	0	0.00952	0.0135	0	0.464
HALSA	680106	46298	8963	0	42957	5622	0	3341	0	0	280.34	19.1	3.69	0	0.0736	0.0111	0	1.38	0	0	0.0444	0	0.237	842	587	66	50	792	571	28	22	631111	43183	8227	0	40185	5229	0	2998	0	0	281.37	19.3	3.67	0	0.0735	0.0109	0	1.34
HANTV	3715	0	28	0	0	28	0	0	0	0	1238.33	0	9.33	0	0	0.0218	0	0	0	0	NaN	NaN	0	0	0	0	0	0	0	0	0
HASV	2508	378	0	0	378	0	0	0	0	0	836	126	0	0	0.309	0	0	0	0	0	0	0	NaN	7	3	0	0	7	3	0	0
HASV1	3157	294	98	0	294	98	0	0	0	0	1052.33	98	32.7	0	0.107	0.0288	0	0	0	0	0	0	0	4	3	0	0	4	3	0	0
HAVHM	2227	0	21	0	0	21	0	0	0	0	2227	0	21	0	0	0.00943	0	0	0	0	NaN	NaN	0	0	0	0	0	0	0	0	0
HBVCJ	1792	234	0	0	234	0	0	0	0	0	358.4	46.8	0	0	0.151	0	0	0	0	0	0	0	NaN	4	4	0	0	4	4	0	0
HCMVM	63402	7610	311	0	7499	200	0	111	0	0	377.39	45.3	1.85	0	0.0955	0.00283	0	0.661	0	0	0.0173	0	0.44	94	61	1	1	92	60	1	1	62392	7474	311	0	7363	200	0	111	0	0	375.86	45	1.87	0	0.0956	0.00286	0	0.669
HCVH	3173	232	21	0	232	21	0	0	0	0	1586.5	116	10.5	0	0.135	0.00349	0	0	0	0	0	0	0	6	2	0	0	6	2	0	0
HDVD3	409	315	126	0	237	48	0	78	0	0	204.5	158	63	0	0.77	0.309	0	39	0	0	0.249	0	0.619	2	2	2	2	4	2	0	0
HELPY	491826	8600	12057	0	6854	10311	0	1746	0	0	316.69	5.54	7.76	0	0.0194	0.0271	0	1.12	0	0	0.182	0	0.0996	113	96	90	78	106	82	65	57	468765	8133	11370	0	6543	9780	0	1590	0	0	313.98	5.45	7.62	0	0.0194	0.0266	0	1.06
HENDH	6056	1331	21	0	1331	21	0	0	0	0	672.89	148	2.33	0	0.284	0.00427	0	0	0	0	0	0	0	8	4	0	0	8	4	0	0
HEVCH	2467	108	0	0	108	0	0	0	0	0	822.33	36	0	0	0.0425	0	0	0	0	0	0	0	NaN	2	2	0	0	2	2	0	0
HHV11	38368	6814	189	37	6777	189	0	0	37	0	525.59	93.3	2.59	0.507	0.204	0.00249	0.00162	0	0.507	0	0	0.00491	0	80	48	1	1	80	48	1	1	38368	6814	189	37	6777	189	0	0	37	0	525.59	93.3	2.59	0.507	0.204	0.00249	0.00162	0
HHV2H	39568	7423	182	0	7423	182	0	0	0	0	534.7	100	2.46	0	0.192	0.0024	0	0	0	0	0	0	0	77	49	1	1	77	49	1	1	38743	6837	182	0	6837	182	0	0	0	0	530.73	93.7	2.49	0	0.185	0.00244	0	0
HHV6U	44715	3865	217	0	3844	196	0	21	0	0	434.13	37.5	2.11	0	0.0749	0.00266	0	0.204	0	0	0.00809	0	0.143	38	19	1	1	38	19	1	1	43605	3197	217	0	3176	196	0	21	0	0	436.05	32	2.17	0	0.0691	0.00274	0	0.21
HHV6Z	43610	3789	292	0	3733	236	0	56	0	0	449.59	39.1	3.01	0	0.0817	0.00432	0	0.577	0	0	0.018	0	0.133	44	18	2	2	44	18	1	1	43610	3789	292	0	3733	236	0	56	0	0	449.59	39.1	3.01	0	0.0817	0.00432	0	0.577
HHV8P	38742	4602	510	0	4267	175	0	335	0	0	450.49	53.5	5.93	0	0.0958	0.00908	0	3.9	0	0	0.0178	0	0.238	44	25	2	2	46	25	1	1	38360	4487	489	0	4159	161	0	328	0	0	456.67	53.4	5.82	0	0.0934	0.00843	0	3.9
HIS1I	4432	173	57	0	116	0	0	57	0	0	126.63	4.94	1.63	0	0.0475	0.0169	0	1.63	0	0	0.282	0	1	4	3	1	1	2	2	0	0	4432	173	57	0	116	0	0	57	0	0	126.63	4.94	1.63	0	0.0475	0.0169	0	1.63
HMPVC	4142	281	0	0	281	0	0	0	0	0	460.22	31.2	0	0	0.127	0	0	0	0	0	0	0	NaN	4	2	0	0	4	2	0	0
HORSE	12750829	1875938	452981	51815	1731818	360247	429	92734	51386	0	562.28	82.7	20	2.28	0.12	0.033	0.00204	4.09	2.27	0	0.058	0.00886	0.217	22135	9056	5051	2595	21039	8709	3905	2000	7136019	1267594	230291	18101	1197372	177991	179	52300	17922	0	560.88	99.6	18.1	1.42	0.15	0.0277	0.00133	4.11
HPBVH	1310	140	42	0	119	21	0	21	0	0	436.67	46.7	14	0	0.172	0.0625	0	7	0	0	0.106	0	0.5	2	2	0	0	3	2	0	0
HPE2W	2179	38	0	0	38	0	0	0	0	0	2179	38	0	0	0.0174	0	0	0	0	0	0	0	NaN	1	1	0	0	1	1	0	0
HPV04	2459	244	0	0	244	0	0	0	0	0	351.29	34.9	0	0	0.123	0	0	0	0	0	0	0	NaN	3	3	0	0	3	3	0	0
HPV05	2827	651	42	0	643	34	0	8	0	0	353.38	81.4	5.25	0	0.237	0.00944	0	1	0	0	0.0432	0	0.19	6	5	0	0	5	4	0	0
HPV16	2452	158	0	0	158	0	0	0	0	0	306.5	19.8	0	0	0.0802	0	0	0	0	0	0	0	NaN	4	3	0	0	4	3	0	0
HPV1A	2408	204	21	0	204	21	0	0	0	0	301	25.5	2.62	0	0.162	0.00655	0	0	0	0	0	0	0	2	2	0	0	2	2	0	0
HPV41	2763	247	21	0	247	21	0	0	0	0	251.18	22.5	1.91	0	0.0967	0.0189	0	0	0	0	0	0	0	4	3	0	0	4	3	0	0	2763	247	21	0	247	21	0	0	0	0	251.18	22.5	1.91	0	0.0967	0.0189	0	0
HRSVB	4540	270	24	0	270	24	0	0	0	0	412.73	24.5	2.18	0	0.0877	0.0038	0	0	0	0	0	0	0	4	2	0	0	4	2	0	0	4540	270	24	0	270	24	0	0	0	0	412.73	24.5	2.18	0	0.0877	0.0038	0	0
HRV8A	2164	0	0	0	0	0	0	0	0	0	2164	0	0	0	0	0	0	0	0	0	NaN	NaN	NaN	0	0	0	0	0	0	0	0
HTL1C	4121	640	107	0	584	51	0	56	0	0	457.89	71.1	11.9	0	0.207	0.0569	0	6.22	0	0	0.0833	0	0.523	10	6	1	1	8	5	0	0
HTL32	3469	62	0	0	62	0	0	0	0	0	578.17	10.3	0	0	0.0568	0	0	0	0	0	0	0	NaN	1	1	0	0	1	1	0	0
HTLV2	3483	307	0	0	307	0	0	0	0	0	580.5	51.2	0	0	0.154	0	0	0	0	0	0	0	NaN	8	4	0	0	8	4	0	0
HUMAN	23391368	4014371	696904	53359	3800385	535729	548	161175	52811	0	339.32	58.2	10.1	0.774	0.143	0.0224	0.00108	2.34	0.766	0	0.0404	0.00504	0.254	48797	24071	7683	4015	46884	23416	5656	2931	8764696	1741975	262055	21038	1658574	199452	240	62603	20798	0	456.14	90.7	13.6	1.09	0.164	0.0206	0.00125	3.26
HV19S	1607	207	0	0	207	0	0	0	0	0	803.5	104	0	0	0.134	0	0	0	0	0	0	0	NaN	1	1	0	0	1	1	0	0
HV1H2	3550	321	112	0	273	64	0	48	0	0	394.44	35.7	12.4	0	0.128	0.0148	0	5.33	0	0	0.101	0	0.371	8	4	2	2	6	4	0	0
HV2BE	3836	517	0	0	517	0	0	0	0	0	426.22	57.4	0	0	0.244	0	0	0	0	0	0	0	NaN	9	5	0	0	9	5	0	0
HYPBU	449830	1651	6454	0	1602	6405	0	49	0	0	280.79	1.03	4.03	0	0.00511	0.0164	0	0.0306	0	0	0.0403	0	0.0058	39	38	44	31	37	36	44	31	436943	1651	6318	0	1602	6269	0	49	0	0	280.45	1.06	4.06	0	0.00525	0.0165	0	0.0315
I34A1	4788	63	84	0	63	84	0	0	0	0	399	5.25	7	0	0.00694	0.0269	0	0	0	0	0	0	0	1	1	0	0	1	1	0	0	4536	63	63	0	63	63	0	0	0	0	412.36	5.73	5.73	0	0.00757	0.0218	0	0
I96A0	4809	94	56	0	94	56	0	0	0	0	400.75	7.83	4.67	0	0.0356	0.0196	0	0	0	0	0	0	0	2	2	1	1	2	2	1	1	4557	94	56	0	94	56	0	0	0	0	414.27	8.55	5.09	0	0.0389	0.0214	0	0
IBDVU	2040	196	21	0	196	21	0	0	0	0	680	65.3	7	0	0.175	0.00796	0	0	0	0	0	0	0	4	3	0	0	4	3	0	0
IBVB	12752	259	0	0	259	0	0	0	0	0	1275.2	25.9	0	0	0.0633	0	0	0	0	0	0	0	NaN	5	1	0	0	5	1	0	0	8801	259	0	0	259	0	0	0	0	0	977.89	28.8	0	0	0.0704	0	0	0
ICHVA	33924	3123	476	0	3096	449	0	27	0	0	446.37	41.1	6.26	0	0.086	0.00749	0	0.355	0	0	0.00443	0	0.0165	38	21	2	2	37	21	2	2	33696	3123	476	0	3096	449	0	27	0	0	449.28	41.6	6.35	0	0.0872	0.00759	0	0.36
ICRSV	2599	290	0	0	290	0	0	0	0	0	433.17	48.3	0	0	0.0712	0	0	0	0	0	0	0	NaN	4	2	0	0	4	2	0	0
IHNVW	3421	84	21	0	84	21	0	0	0	0	570.17	14	3.5	0	0.0486	0.00176	0	0	0	0	0	0	0	2	2	0	0	2	2	0	0
IIV3	43365	2584	553	0	2569	538	0	15	0	0	344.17	20.5	4.39	0	0.0605	0.0092	0	0.119	0	0	0.00162	0	0.051	33	21	0	0	33	21	0	0	43365	2584	553	0	2569	538	0	15	0	0	344.17	20.5	4.39	0	0.0605	0.0092	0	0.119
IIV6	77551	1763	1682	0	1666	1585	0	97	0	0	165.71	3.77	3.59	0	0.0206	0.0145	0	0.207	0	0	0.0559	0	0.073	31	22	17	15	29	21	15	13	74706	1763	1445	0	1666	1348	0	97	0	0	164.19	3.87	3.18	0	0.0212	0.0135	0	0.213
INBLE	4718	71	28	0	71	28	0	0	0	0	428.91	6.45	2.55	0	0.0115	0.00436	0	0	0	0	0	0	0	1	1	0	0	1	1	0	0	4718	71	28	0	71	28	0	0	0	0	428.91	6.45	2.55	0	0.0115	0.00436	0	0
INCAA	4259	53	49	0	53	49	0	0	0	0	532.38	6.62	6.12	0	0.0117	0.00873	0	0	0	0	0	0	0	1	1	0	0	1	1	0	0
IPNVJ	1965	195	21	0	195	21	0	0	0	0	655	65	7	0	0.0698	0.00828	0	0	0	0	0	0	0	4	2	0	0	4	2	0	0
ISAV8	4281	107	49	0	107	49	0	0	0	0	428.1	10.7	4.9	0	0.0457	0.0209	0	0	0	0	0	0	0	1	1	1	1	1	1	1	1	4281	107	49	0	107	49	0	0	0	0	428.1	10.7	4.9	0	0.0457	0.0209	0	0
IXOSC	5815358	747888	87353	3203	722990	65655	3	21698	3200	0	284.05	36.5	4.27	0.156	0.131	0.012	0.000264	1.06	0.156	0	0.0278	0.00113	0.24	9509	5764	822	506	9224	5654	531	335	5020307	726558	82737	2188	703677	62041	3	20696	2185	0	299.36	43.3	4.93	0.13	0.154	0.0133	0.000259	1.23
JDNVP	1816	194	0	0	194	0	0	0	0	0	454	48.5	0	0	0.0681	0	0	0	0	0	0	0	NaN	3	2	0	0	3	2	0	0
KORCO	475001	848	6488	0	827	6467	0	21	0	0	296.5	0.529	4.05	0	0.00218	0.0161	0	0.0131	0	0	0.0437	0	0.00633	19	16	54	41	18	15	54	41	453960	848	6013	0	827	5992	0	21	0	0	295.74	0.552	3.92	0	0.00228	0.0148	0	0.0137
KORVE	1677413	39822	12929	0	38303	11410	0	1519	0	0	351.59	8.35	2.71	0	0.0261	0.00812	0	0.318	0	0	0.0326	0	0.0683	629	489	73	64	601	472	58	54	1560627	38424	12430	0	36905	10911	0	1519	0	0	348.43	8.58	2.78	0	0.0266	0.00836	0	0.339
LACLA	656950	9383	9078	162	8629	8374	112	704	50	0	295.26	4.22	4.08	0.0728	0.013	0.0152	6.29e-05	0.316	0.0225	0	0.0982	0.0391	0.0576	140	111	59	45	117	93	50	39	616564	8959	8631	162	8212	7934	112	697	50	0	298.58	4.34	4.18	0.0785	0.0135	0.0148	6.78e-05	0.338
LACPL	934303	22065	6551	38	20975	5499	0	1052	38	0	302.56	7.15	2.12	0.0123	0.0171	0.00707	3.24e-05	0.341	0.0123	0	0.0719	0.00428	0.137	276	202	37	29	249	183	24	18	834847	20890	5989	38	19944	5081	0	908	38	0	301.82	7.55	2.17	0.0137	0.0174	0.00727	3.62e-05	0.328
LAMBD	14272	637	267	0	580	210	0	57	0	0	216.24	9.65	4.05	0	0.0202	0.0195	0	0.864	0	0	0.101	0	0.264	12	7	1	1	10	6	1	1	14272	637	267	0	580	210	0	57	0	0	216.24	9.65	4.05	0	0.0202	0.0195	0	0.864
LASSJ	3377	0	21	0	0	21	0	0	0	0	844.25	0	5.25	0	0	0.00237	0	0	0	0	NaN	NaN	0	0	0	0	0	0	0	0	0
LATCH	12139710	1533001	401119	30392	1417985	315880	615	85239	29777	0	517.99	65.4	17.1	1.3	0.0993	0.0285	0.00154	3.64	1.27	0	0.0604	0.00881	0.214	19167	8176	4408	2164	18131	7850	3306	1612	7006810	1004792	240706	16160	934278	186130	222	54576	15938	0	562.93	80.7	19.3	1.3	0.118	0.0295	0.00148	4.38
LBVAV	3592	107	0	0	107	0	0	0	0	0	598.67	17.8	0	0	0.0536	0	0	0	0	0	0	0	NaN	2	1	0	0	2	1	0	0
LCDV1	459	0	0	0	0	0	0	0	0	0	459	0	0	0	0	0	0	0	0	0	NaN	NaN	NaN	0	0	0	0	0	0	0	0
LDCPR	7701	226	56	0	226	56	0	0	0	0	770.1	22.6	5.6	0	0.0328	0.00521	0	0	0	0	0	0	0	3	3	1	1	3	3	1	1	7701	226	56	0	226	56	0	0	0	0	770.1	22.6	5.6	0	0.0328	0.00521	0	0
LEIBR	5087935	832202	124342	0	795833	87973	0	36369	0	0	627.99	103	15.3	0	0.13	0.0217	0	4.49	0	0	0.0381	0	0.232	11716	3957	1070	542	11220	3868	716	374	4782972	799610	114206	0	768503	83099	0	31107	0	0	643.48	108	15.4	0	0.135	0.0219	0	4.18
LEIIN	5116889	943680	131409	0	900758	88487	0	42922	0	0	635.88	117	16.3	0	0.146	0.0234	0	5.33	0	0	0.0426	0	0.266	12695	4140	1192	581	12162	4035	723	401	4896743	932163	126533	0	891926	86296	0	40237	0	0	647.8	123	16.7	0	0.153	0.0239	0	5.32
LEIMA	5145570	929225	131001	0	888212	89988	0	41013	0	0	639.92	116	16.3	0	0.14	0.0226	0	5.1	0	0	0.0415	0	0.253	12380	4078	1206	570	11848	3981	774	403	4906956	918179	127246	0	878503	87570	0	39676	0	0	651.91	122	16.9	0	0.147	0.0234	0	5.27
LEPIN	1159747	11758	12575	0	11092	11909	0	666	0	0	315.49	3.2	3.42	0	0.00991	0.0103	0	0.181	0	0	0.0469	0	0.0386	187	150	80	69	175	146	74	64	1086044	11484	11287	0	10818	10621	0	666	0	0	315.16	3.33	3.28	0	0.0102	0.00953	0	0.193
LISMO	870843	11005	12397	0	9958	11350	0	1047	0	0	306.2	3.87	4.36	0	0.0114	0.0161	0	0.368	0	0	0.101	0	0.0534	197	145	79	63	171	127	62	52	811875	10644	11903	0	9597	10856	0	1047	0	0	306.14	4.01	4.49	0	0.0115	0.0166	0	0.395
LIYV9	6620	140	42	0	140	42	0	0	0	0	735.56	15.6	4.67	0	0.0299	0.00223	0	0	0	0	0	0	0	4	4	0	0	4	4	0	0
LNYV3	3857	44	42	0	44	42	0	0	0	0	642.83	7.33	7	0	0.0244	0.0193	0	0	0	0	0	0	0	1	1	0	0	1	1	0	0
LOLV	2527	233	0	0	233	0	0	0	0	0	421.17	38.8	0	0	0.0603	0	0	0	0	0	0	0	NaN	3	2	0	0	3	2	0	0
LOXAF	13857996	2172713	418252	38977	2045717	330002	231	88250	38746	0	541.01	84.8	16.3	1.52	0.127	0.0245	0.00161	3.45	1.51	0	0.0424	0.00711	0.225	25977	10747	4606	2110	24869	10467	3479	1607	7265815	1288690	224904	17420	1223224	176720	138	48184	17282	0	557.19	98.8	17.2	1.34	0.149	0.0263	0.00141	3.7
LRVLG	1687	0	0	0	0	0	0	0	0	0	562.33	0	0	0	0	0	0	0	0	0	NaN	NaN	NaN	0	0	0	0	0	0	0	0
LYCVA	3356	0	0	0	0	0	0	0	0	0	839	0	0	0	0	0	0	0	0	0	NaN	NaN	NaN	0	0	0	0	0	0	0	0
MABVM	4873	572	45	0	569	42	0	3	0	0	696.14	81.7	6.43	0	0.139	0.00934	0	0.429	0	0	0.00306	0	0.0625	4	4	0	0	4	4	0	0
MACMU	17042562	2834798	550779	55743	2651790	422975	539	127804	55204	0	479.56	79.8	15.5	1.57	0.137	0.0261	0.00185	3.6	1.55	0	0.0458	0.00734	0.25	33742	14854	6138	2916	32237	14441	4550	2152	7751097	1464972	235444	22091	1387592	179915	240	55529	21851	0	523.12	98.9	15.9	1.49	0.161	0.0247	0.00173	3.75
MBVLF	1454	179	0	0	179	0	0	0	0	0	363.5	44.8	0	0	0.0946	0	0	0	0	0	0	0	NaN	2	2	0	0	2	2	0	0
MCMVK	1769	88	0	0	88	0	0	0	0	0	442.25	22	0	0	0.0864	0	0	0	0	0	0	0	NaN	2	2	0	0	2	2	0	0
MCV1	54465	4373	350	29	4216	222	0	128	29	0	334.14	26.8	2.15	0.178	0.0573	0.00608	0.000326	0.785	0.178	0	0.00874	0.00601	0.143	63	36	1	1	62	36	0	0	54465	4373	350	29	4216	222	0	128	29	0	334.14	26.8	2.15	0.178	0.0573	0.00608	0.000326	0.785
MDBVW	10188	1033	0	0	1033	0	0	0	0	0	192.23	19.5	0	0	0.0596	0	0	0	0	0	0	0	NaN	10	6	0	0	10	6	0	0	6617	593	0	0	593	0	0	0	0	0	183.81	16.5	0	0	0.0619	0	0	0
MEASC	5202	486	21	0	486	21	0	0	0	0	650.25	60.8	2.62	0	0.163	0.00477	0	0	0	0	0	0	0	9	4	0	0	9	4	0	0
MELGA	8776990	1185742	301155	33299	1087532	235807	437	65348	32862	0	530.75	71.7	18.2	2.01	0.11	0.0298	0.00227	3.95	1.99	0	0.0591	0.0107	0.225	14732	6237	3165	1514	13941	5993	2417	1136	5855700	850593	202494	16667	791304	159673	199	42821	16468	0	552.69	80.3	19.1	1.57	0.12	0.0299	0.00164	4.04
MESFL	245043	1313	5140	0	1166	4993	0	147	0	0	358.77	1.92	7.53	0	0.00804	0.0219	0	0.215	0	0	0.122	0	0.0181	24	21	34	28	18	16	34	27	234038	1313	4979	0	1166	4832	0	147	0	0	354.6	1.99	7.54	0	0.00833	0.0218	0	0.223
METAC	1392324	20522	16994	0	19271	15743	0	1251	0	0	311.62	4.59	3.8	0	0.0147	0.0113	0	0.28	0	0	0.0596	0	0.0571	358	296	118	88	331	280	100	73	1101961	18363	13804	0	17274	12715	0	1089	0	0	305	5.08	3.82	0	0.0167	0.0117	0	0.301
METHJ	996237	12549	10184	0	12001	9636	0	548	0	0	322.72	4.07	3.3	0	0.0105	0.0084	0	0.178	0	0	0.0515	0	0.0402	180	144	81	60	172	136	75	55	888965	11485	9083	0	11075	8673	0	410	0	0	323.73	4.18	3.31	0	0.0109	0.00835	0	0.149
METJA	505150	539	11073	0	388	10922	0	151	0	0	282.68	0.302	6.2	0	0.000921	0.0241	0	0.0845	0	0	0.269	0	0.0107	11	11	70	56	6	6	68	54	480380	539	10772	0	388	10621	0	151	0	0	284.92	0.32	6.39	0	0.000976	0.0248	0	0.0896
METKA	500958	7030	8268	0	6621	7859	0	409	0	0	296.95	4.17	4.9	0	0.0154	0.0173	0	0.242	0	0	0.0683	0	0.0427	130	116	52	40	120	107	48	36	479257	6860	8128	0	6451	7719	0	409	0	0	297.68	4.26	5.05	0	0.0156	0.0176	0	0.254
METTH	524520	3845	5477	0	3598	5230	0	247	0	0	280.64	2.06	2.93	0	0.00866	0.0117	0	0.132	0	0	0.0723	0	0.0476	71	68	34	28	64	61	31	25	496438	3411	5277	0	3227	5093	0	184	0	0	280	1.92	2.98	0	0.00827	0.0119	0	0.104
MILVL	3911	0	21	0	0	21	0	0	0	0	558.71	0	3	0	0	0.00132	0	0	0	0	NaN	NaN	0	0	0	0	0	0	0	0	0
MIMIV	341649	22011	3237	3111	18506	2672	171	565	2940	0	375.85	24.2	3.56	3.42	0.0513	0.0105	0.00279	0.622	3.23	0	0.0465	0.0295	0.171	233	147	21	21	220	138	17	17	319213	20886	3002	2750	17698	2458	106	544	2644	0	377.32	24.7	3.55	3.25	0.0533	0.0103	0.00247	0.643
MLVMS	2941	613	90	0	551	28	0	62	0	0	980.33	204	30	0	0.241	0.0392	0	20.7	0	0	0.073	0	0.667	8	3	2	2	7	3	0	0
MMTVC	4213	344	21	0	344	21	0	0	0	0	842.6	68.8	4.2	0	0.0652	0.0061	0	0	0	0	0	0	0	6	3	0	0	6	3	0	0
MMVR	3750	86	0	0	86	0	0	0	0	0	625	14.3	0	0	0.0409	0	0	0	0	0	0	0	NaN	2	2	0	0	2	2	0	0
MNPVA	2426	439	0	0	439	0	0	0	0	0	404.33	73.2	0	0	0.134	0	0	0	0	0	0	0	NaN	4	3	0	0	4	3	0	0
MOKV	3604	92	0	0	92	0	0	0	0	0	720.8	18.4	0	0	0.0607	0	0	0	0	0	0	0	NaN	2	1	0	0	2	1	0	0
MONBE	5511963	813280	135653	2165	755253	79743	48	55910	2117	0	599.91	88.5	14.8	0.236	0.139	0.024	0.000137	6.09	0.23	0	0.0624	0.000399	0.339	8786	4086	1408	782	8266	3962	653	413	5085434	786028	128850	2165	729659	74598	48	54252	2117	0	609.84	94.3	15.5	0.26	0.147	0.025	0.000151	6.51
MONDO	11804469	1740455	355926	26162	1627933	269176	390	86750	25772	0	530.78	78.3	16	1.18	0.122	0.0286	0.00136	3.9	1.16	0	0.0575	0.0068	0.257	21232	8866	3717	1969	20231	8557	2692	1377	7627795	1374245	245113	18137	1292917	181628	294	63485	17843	0	577.56	104	18.6	1.37	0.153	0.0306	0.00157	4.81
MOOTA	751866	7924	10008	0	7628	9712	0	296	0	0	306.76	3.23	4.08	0	0.0101	0.0139	0	0.121	0	0	0.0487	0	0.0315	136	109	73	51	123	102	72	50	701521	7855	9532	0	7585	9262	0	270	0	0	307.41	3.44	4.18	0	0.0106	0.0141	0	0.118
MOUSE	19604607	3403751	609671	38892	3214019	458608	216	151056	38669	0	452.93	78.6	14.1	0.899	0.144	0.0244	0.00116	3.49	0.893	0	0.0446	0.00517	0.262	40175	17315	6610	3276	38516	16871	4712	2333	8307074	1626806	250457	18481	1545996	187954	167	62496	18307	0	524.57	103	15.8	1.17	0.163	0.0238	0.00119	3.95
MPRVN	8005	142	28	0	142	28	0	0	0	0	727.73	12.9	2.55	0	0.0216	0.00134	0	0	0	0	0	0	0	3	3	0	0	3	3	0	0	8005	142	28	0	142	28	0	0	0	0	727.73	12.9	2.55	0	0.0216	0.00134	0	0
MRFVC	2446	466	0	0	466	0	0	0	0	0	1223	233	0	0	0.384	0	0	0	0	0	0	0	NaN	6	2	0	0	6	2	0	0
MSVS	972	43	0	0	43	0	0	0	0	0	243	10.8	0	0	0.0441	0	0	0	0	0	0	0	NaN	1	1	0	0	1	1	0	0
MUHVS	10487	1581	21	0	1581	21	0	0	0	0	699.13	105	1.4	0	0.146	0.00151	0	0	0	0	0	0	0	14	9	0	0	14	9	0	0	10487	1581	21	0	1581	21	0	0	0	0	699.13	105	1.4	0	0.146	0.00151	0	0
MUMIP	2754	247	0	0	247	0	0	0	0	0	393.43	35.3	0	0	0.0529	0	0	0	0	0	0	0	NaN	6	4	0	0	6	4	0	0
MUMPM	4977	375	28	0	375	28	0	0	0	0	622.12	46.9	3.5	0	0.128	0.00895	0	0	0	0	0	0	0	5	3	0	0	5	3	0	0
MYCMS	319461	4417	8338	0	4097	8018	0	320	0	0	326.65	4.52	8.53	0	0.017	0.0292	0	0.327	0	0	0.0711	0	0.0266	73	65	54	43	65	61	50	42	262899	3248	6985	0	2958	6695	0	290	0	0	323.77	4	8.6	0	0.0153	0.0302	0	0.357
MYCPN	239753	10031	6243	0	9496	5708	0	535	0	0	348.99	14.6	9.09	0	0.0386	0.0237	0	0.779	0	0	0.0786	0	0.102	157	92	64	40	145	84	58	34	200857	5442	5186	0	4986	4730	0	456	0	0	355.5	9.63	9.18	0	0.0256	0.02	0	0.807
MYCS2	2082061	69283	8219	96	67823	6855	0	1364	96	0	315.42	10.5	1.25	0.0145	0.0437	0.0041	3.9e-05	0.207	0.0145	0	0.0175	0.000602	0.138	1091	874	38	34	1075	860	26	23	1818452	66027	7504	96	64654	6227	0	1277	96	0	311.11	11.3	1.28	0.0164	0.0477	0.00422	4.41e-05	0.218
MYCTU	1329959	57864	5262	65	57381	4840	4	422	61	0	333.99	14.5	1.32	0.0163	0.0416	0.00449	8.41e-05	0.106	0.0153	0	0.0117	0.00121	0.0775	788	590	21	16	778	581	19	14	1174312	54345	4737	65	53872	4325	4	412	61	0	329.31	15.2	1.33	0.0182	0.0435	0.00467	9.39e-05	0.116
MYOLU	10579155	1726613	314909	29972	1625047	243015	300	71894	29672	0	512.31	83.6	15.2	1.45	0.132	0.0244	0.00179	3.48	1.44	0	0.0464	0.00843	0.247	20428	8671	3451	1670	19569	8390	2561	1210	7089194	1322155	223465	16547	1253301	171032	126	52433	16421	0	571.06	107	18	1.33	0.157	0.027	0.00146	4.22
MYRV9	7268	274	0	0	274	0	0	0	0	0	660.73	24.9	0	0	0.0484	0	0	0	0	0	0	0	NaN	2	2	0	0	2	2	0	0	7268	274	0	0	274	0	0	0	0	0	660.73	24.9	0	0	0.0484	0	0	0
MYXVL	48407	1052	67	0	1052	67	0	0	0	0	306.37	6.66	0.424	0	0.0261	0.00231	0	0	0	0	0	0	0	19	12	0	0	19	12	0	0	47898	1052	67	0	1052	67	0	0	0	0	305.08	6.7	0.427	0	0.0263	0.00233	0	0
NANEQ	151454	414	3909	0	316	3811	0	98	0	0	282.56	0.772	7.29	0	0.00468	0.0322	0	0.183	0	0	0.222	0	0.0246	8	8	29	22	5	5	28	22	151100	414	3909	0	316	3811	0	98	0	0	282.43	0.774	7.31	0	0.00469	0.0322	0	0.183
NCBVS	2537	599	21	0	599	21	0	0	0	0	1268.5	300	10.5	0	0.197	0.00545	0	0	0	0	0	0	0	3	2	0	0	3	2	0	0
NDVB1	5000	662	53	0	662	53	0	0	0	0	625	82.8	6.62	0	0.311	0.00842	0	0	0	0	0	0	0	4	4	1	1	4	4	1	1
NECH7	7536017	1026693	90772	102	987601	51778	4	38994	98	0	479.73	65.4	5.78	0.00649	0.119	0.0111	8.56e-06	2.48	0.00624	0	0.0336	5.67e-05	0.354	11222	5836	749	531	11038	5733	295	226	6317695	999175	86569	102	960562	48054	4	38515	98	0	491.65	77.8	6.74	0.00794	0.14	0.0129	1.05e-05	3
NEIG1	555344	13157	6248	0	12291	5382	0	866	0	0	282.91	6.7	3.18	0	0.027	0.011	0	0.441	0	0	0.0473	0	0.087	210	162	43	30	202	156	31	23	534930	12063	5873	0	11210	5020	0	853	0	0	286.21	6.45	3.14	0	0.0254	0.0107	0	0.456
NEIMB	583208	14097	6570	0	13043	5516	0	1054	0	0	291.46	7.04	3.28	0	0.0232	0.0112	0	0.527	0	0	0.0506	0	0.085	231	159	47	33	224	152	35	26	551673	12554	6409	0	11535	5390	0	1019	0	0	291.12	6.62	3.38	0	0.0229	0.0116	0	0.538
NEMVE	8260405	795590	151120	11668	744208	110765	641	40355	11027	0	338.06	32.6	6.18	0.478	0.0857	0.0159	0.0017	1.65	0.451	0	0.0534	0.0121	0.229	9376	5197	1474	965	8857	4964	980	705	6292276	704341	132856	7685	660791	96481	510	36375	7175	0	392.9	44	8.3	0.48	0.103	0.0197	0.00136	2.27
NEUCR	4782371	1203792	103913	42	1154621	54783	1	49130	41	0	486.01	122	10.6	0.00427	0.22	0.0188	2.44e-05	4.99	0.00417	0	0.037	0.000136	0.466	12426	5522	1016	633	12283	5445	441	254	4641716	1197504	103115	42	1148481	54133	1	48982	41	0	488.5	126	10.9	0.00442	0.226	0.0192	2.53e-05	5.15
NITMS	493620	10723	8763	192	9267	7499	0	1264	192	0	275	5.97	4.88	0.107	0.0197	0.0186	0.000192	0.704	0.107	0	0.111	0.00701	0.0886	178	108	70	40	163	97	56	33	467872	10218	8651	192	8790	7415	0	1236	192	0	276.36	6.04	5.11	0.113	0.0197	0.0193	0.000203	0.73
NODAM	1579	215	21	0	215	21	0	0	0	0	526.33	71.7	7	0	0.0935	0.0511	0	0	0	0	0	0	0	2	2	0	0	2	2	0	0
NOMLE	10695254	1777469	322164	24907	1679978	249312	268	72852	24639	0	541.97	90.1	16.3	1.26	0.14	0.0248	0.00129	3.69	1.25	0	0.0411	0.00581	0.252	21333	8947	3547	1681	20507	8732	2677	1245	7604878	1420210	231164	16080	1349723	176561	196	54603	15884	0	555.79	104	16.9	1.18	0.158	0.0249	0.0012	3.99
NPVR1	41291	1219	795	0	1176	752	0	43	0	0	277.12	8.18	5.34	0	0.0341	0.016	0	0.289	0	0	0.0319	0	0.0258	21	18	6	3	20	17	6	3	41291	1219	795	0	1176	752	0	43	0	0	277.12	8.18	5.34	0	0.0341	0.016	0	0.289
NVN68	2531	244	21	0	244	21	0	0	0	0	843.67	81.3	7	0	0.0455	0.00391	0	0	0	0	0	0	0	4	1	0	0	4	1	0	0
OCSVU	1280	0	0	0	0	0	0	0	0	0	426.67	0	0	0	0	0	0	0	0	0	NaN	NaN	NaN	0	0	0	0	0	0	0	0
OLV2I	2214	46	21	0	46	21	0	0	0	0	553.5	11.5	5.25	0	0.0341	0.00578	0	0	0	0	0	0	0	1	1	0	0	1	1	0	0
ORENI	15900418	2531963	527022	51718	2326177	372566	388	154456	51330	0	594.34	94.6	19.7	1.93	0.127	0.0279	0.00178	5.77	1.92	0	0.0606	0.00788	0.273	28930	11639	5712	2709	27346	11264	3838	1888	7493685	1382401	258265	18969	1283870	178523	180	79742	18789	0	603.31	111	20.8	1.53	0.151	0.0295	0.00155	6.42
ORNAN	9152217	1452302	262959	26992	1366633	203937	345	59022	26647	0	388.61	61.7	11.2	1.15	0.131	0.0243	0.00217	2.51	1.13	0	0.0428	0.0093	0.245	17093	8348	2919	1481	16335	8079	2129	1076	6249680	1172598	185302	15078	1112294	139840	236	45462	14842	0	418.94	78.6	12.4	1.01	0.164	0.0257	0.00197	3.05
ORYLA	11965754	1528381	353784	35462	1406432	267075	222	86709	35240	0	485.78	62	14.4	1.44	0.113	0.0252	0.00157	3.52	1.43	0	0.0539	0.00786	0.223	19576	9153	3718	1898	18313	8842	2705	1407	6502981	1008618	196693	19301	938334	145568	142	51125	19159	0	516.07	80	15.6	1.53	0.139	0.0261	0.00157	4.06
ORYSJ	22210771	3392134	321998	0	3313419	243283	0	78715	0	0	351.24	53.6	5.09	0	0.188	0.0108	0	1.24	0	0	0.0191	0	0.245	46201	27650	2737	1935	45536	27388	1814	1315	9965626	1958187	126874	0	1925335	94022	0	32852	0	0	296.08	58.2	3.77	0	0.235	0.00909	0	0.976
OSHVF	51428	2690	802	0	2589	701	0	101	0	0	443.34	23.2	6.91	0	0.0472	0.0128	0	0.871	0	0	0.0596	0	0.107	46	27	6	5	44	26	7	5	50934	2690	781	0	2589	680	0	101	0	0	442.9	23.4	6.79	0	0.0476	0.0125	0	0.878
OTOGA	10768581	1697229	314660	28312	1598706	244145	304	70515	28008	0	540.32	85.2	15.8	1.42	0.13	0.025	0.00141	3.54	1.41	0	0.0462	0.00656	0.251	20495	8537	3473	1708	19694	8294	2578	1238	7475772	1370434	230045	18398	1299866	177663	212	52382	18186	0	581.77	107	17.9	1.43	0.154	0.0268	0.00138	4.08
OUMVV	1358	91	21	0	91	21	0	0	0	0	452.67	30.3	7	0	0.105	0.00814	0	0	0	0	0	0	0	1	1	0	0	1	1	0	0
PANTR	10627310	1776711	318522	28217	1676317	245982	363	72540	27854	0	528.01	88.3	15.8	1.4	0.14	0.0243	0.00137	3.6	1.38	0	0.0414	0.00653	0.256	21127	8909	3476	1654	20299	8689	2618	1232	7551631	1437452	235279	19464	1363303	180277	317	55002	19147	0	556.13	106	17.3	1.43	0.16	0.0252	0.00135	4.05
PAPVE	2914	319	0	0	319	0	0	0	0	0	194.27	21.3	0	0	0.109	0	0	0	0	0	0	0	NaN	6	4	0	0	6	4	0	0	2914	319	0	0	319	0	0	0	0	0	194.27	21.3	0	0	0.109	0	0	0
PARTE	18009409	1056455	1028985	56	924985	897571	0	131414	56	0	456.39	26.8	26.1	0.00142	0.06	0.0538	7.54e-07	3.33	0.00142	0	0.115	7.49e-05	0.127	15860	10110	10627	5283	13851	9159	9012	4506	8826571	541205	533907	0	469772	462474	0	71433	0	0	465.46	28.5	28.2	0	0.0585	0.0542	0	3.77
PAVBP	1612	336	0	0	336	0	0	0	0	0	537.33	112	0	0	0.236	0	0	0	0	0	0	0	NaN	6	3	0	0	6	3	0	0
PBCV1	136702	7655	1453	59	7196	1053	0	400	59	0	172.39	9.65	1.83	0.0744	0.0361	0.0084	0.00031	0.504	0.0744	0	0.0481	0.0075	0.17	104	69	12	12	102	67	8	8	129301	7206	1432	59	6747	1032	0	400	59	0	169.69	9.46	1.88	0.0774	0.0349	0.00866	0.000323	0.525
PCV1C	542	0	0	0	0	0	0	0	0	0	271	0	0	0	0	0	0	0	0	0	NaN	NaN	NaN	0	0	0	0	0	0	0	0
PCV87	3091	0	161	0	0	161	0	0	0	0	441.57	0	23	0	0	0.0885	0	0	0	0	NaN	NaN	0	0	0	2	2	0	0	2	2
PCVC	3858	199	21	0	199	21	0	0	0	0	964.5	49.8	5.25	0	0.0522	0.0047	0	0	0	0	0	0	0	3	2	0	0	3	2	0	0
PEDHC	5535367	767878	155354	6010	729242	122643	85	32711	5925	0	514.3	71.3	14.4	0.558	0.109	0.024	0.000409	3.04	0.55	0	0.0485	0.00141	0.238	9598	3787	1513	803	9299	3670	1144	557	5226574	755039	150488	4741	718374	118509	55	31979	4686	0	526.5	76.1	15.2	0.478	0.114	0.0249	0.000303	3.22
PEMVW	2926	485	0	0	485	0	0	0	0	0	585.2	97	0	0	0.175	0	0	0	0	0	0	0	NaN	6	4	0	0	6	4	0	0
PHANO	6076935	1016401	94004	76	973527	51201	5	42803	71	0	379.86	63.5	5.88	0.00475	0.149	0.0123	7.12e-06	2.68	0.00444	0	0.0344	0.000165	0.389	11730	6197	841	554	11460	6096	337	237	5779932	1010391	92748	76	967865	50293	5	42455	71	0	379.48	66.3	6.09	0.00499	0.156	0.0127	7.47e-06	2.79
PHATC	4838670	552386	60676	25	534421	42711	25	17965	0	0	462.37	52.8	5.8	0.00239	0.0988	0.0121	5.29e-06	1.72	0	0	0.029	0	0.269	7618	3776	499	341	7460	3723	308	212	4278968	517439	57581	25	499965	40107	25	17474	0	0	469.44	56.8	6.32	0.00274	0.105	0.0131	6.07e-06	1.92
PHYIT	7440308	750813	170316	54	702756	122313	0	48003	54	0	422.53	42.6	9.67	0.00307	0.099	0.0199	3.38e-06	2.73	0.00307	0	0.0567	0.000132	0.261	10582	5774	1660	997	9886	5569	1012	654	5680129	654292	151472	54	610879	108113	0	43359	54	0	465.62	53.6	12.4	0.00443	0.116	0.0242	4.88e-06	3.55
PHYPA	12696586	1221988	221998	0	1190130	190140	0	31858	0	0	364.46	35.1	6.37	0	0.0888	0.016	0	0.914	0	0	0.0247	0	0.128	19444	11327	1658	1180	18978	11115	1247	886	6713683	742160	96504	0	723102	77446	0	19058	0	0	368.24	40.7	5.29	0	0.0992	0.0109	0	1.05
PIG	11789359	1963992	351741	29610	1853837	270848	348	80893	29262	0	452.24	75.3	13.5	1.14	0.133	0.0244	0.00156	3.1	1.12	0	0.0442	0.00713	0.252	22923	10194	3823	1859	21998	9891	2841	1365	6886409	1330420	213064	17135	1262707	162364	122	50700	17013	0	500.54	96.7	15.5	1.25	0.161	0.0265	0.00157	3.69
PLABA	2837789	226149	91851	0	204584	70286	0	21565	0	0	243.46	19.4	7.88	0	0.0517	0.0218	0	1.85	0	0	0.0993	0	0.216	3371	1914	698	481	3070	1766	501	339	2520605	200370	81384	0	180889	61903	0	19481	0	0	251.68	20	8.13	0	0.0487	0.0212	0	1.95
PLACH	2835222	279287	81327	0	257870	59910	0	21417	0	0	194.01	19.1	5.57	0	0.0648	0.02	0	1.47	0	0	0.0855	0	0.252	3913	2491	611	481	3594	2306	405	302	2416307	243811	71622	0	224279	52090	0	19532	0	0	202.25	20.4	5.99	0	0.0635	0.0197	0	1.63
PLAF7	4074762	631551	182941	131	563884	115405	0	67536	131	0	765.21	119	34.4	0.0246	0.106	0.0417	1.71e-05	12.7	0.0246	0	0.124	0.000257	0.322	7920	2400	1396	900	7476	2251	738	456	3826129	602601	173952	131	536845	108327	0	65625	131	0	779.25	123	35.4	0.0267	0.111	0.0427	1.85e-05	13.4
PLAKH	3704850	671108	98234	245	642608	69887	92	28347	153	0	726.44	132	19.3	0.048	0.135	0.0278	3.38e-05	5.56	0.03	0	0.0437	0.00028	0.278	8345	2633	815	491	8224	2582	557	315	3537186	660307	94749	245	632565	67160	92	27589	153	0	735.53	137	19.7	0.0509	0.138	0.0282	3.58e-05	5.74
PLAVS	3748164	863422	102166	463	827093	66249	51	35917	412	0	695.52	160	19	0.0859	0.166	0.0282	9.35e-05	6.66	0.0765	0	0.0431	0.000492	0.315	9666	2958	937	524	9607	2907	527	302	3638461	847037	98771	380	812264	64327	51	34444	329	0	717.65	167	19.5	0.075	0.169	0.0285	8.5e-05	6.79
PLAYO	3387422	407704	128486	946	368095	89598	225	38888	721	0	436.69	52.6	16.6	0.122	0.0783	0.029	0.000222	5.01	0.0929	0	0.104	0.00269	0.266	5436	2286	998	650	5080	2136	597	374	2974340	390791	116904	946	351741	78575	225	38329	721	0	480.66	63.2	18.9	0.153	0.0908	0.0324	0.000278	6.19
PLRV1	3639	867	63	0	846	42	0	21	0	0	404.33	96.3	7	0	0.207	0.0208	0	2.33	0	0	0.0515	0	0.333	11	6	0	0	10	6	0	0
PMTVS	3653	194	42	0	173	21	0	21	0	0	521.86	27.7	6	0	0.0449	0.00331	0	3	0	0	0.162	0	0.5	3	2	0	0	2	2	0	0
PMVK	1498	109	0	0	109	0	0	0	0	0	299.6	21.8	0	0	0.191	0	0	0	0	0	0	0	NaN	2	2	0	0	2	2	0	0
PNLV	2331	259	21	0	259	21	0	0	0	0	582.75	64.8	5.25	0	0.0798	0.00477	0	0	0	0	0	0	0	5	2	0	0	5	2	0	0
POL1M	2209	33	0	0	33	0	0	0	0	0	2209	33	0	0	0.0149	0	0	0	0	0	0	0	NaN	1	1	0	0	1	1	0	0
POLPA	6385196	928837	156995	0	856505	84663	0	72332	0	0	516.98	75.2	12.7	0	0.124	0.022	0	5.86	0	0	0.0754	0	0.42	9799	4711	1503	979	9563	4530	625	411	5399036	900968	147654	0	830532	77218	0	70436	0	0	536.04	89.5	14.7	0	0.144	0.0246	0	6.99
POLVP	1483	67	0	0	67	0	0	0	0	0	370.75	16.8	0	0	0.0692	0	0	0	0	0	0	0	NaN	1	1	0	0	1	1	0	0
PONAB	11454238	1900412	345093	30273	1788682	263369	267	81724	30006	0	502.71	83.4	15.1	1.33	0.139	0.0244	0.00135	3.59	1.32	0	0.0434	0.00581	0.255	22659	9854	3779	1839	21695	9602	2810	1357	7618522	1435129	236372	18958	1360386	180375	212	55997	18746	0	527.82	99.4	16.4	1.31	0.16	0.0245	0.00135	3.88
POPTR	14155519	1126428	213542	0	1087184	174298	0	39244	0	0	338.7	27	5.11	0	0.0765	0.014	0	0.939	0	0	0.0336	0	0.185	16959	9829	1856	1307	16452	9593	1377	954	6279718	653306	109299	0	630695	86688	0	22611	0	0	345.5	35.9	6.01	0	0.0975	0.015	0	1.24
PRIPA	8406767	1233234	212081	22952	1118088	119592	295	92489	22657	0	289.1	42.4	7.29	0.789	0.121	0.0198	0.00226	3.18	0.779	0	0.0654	0.0119	0.371	14524	8374	2037	1345	13707	7976	910	671	6757714	1121388	188471	10386	1026263	103506	226	84965	10160	0	304.24	50.5	8.49	0.468	0.138	0.0223	0.00117	3.83
PROMA	516670	7022	5271	0	6790	5039	0	232	0	0	274.68	3.73	2.8	0	0.0164	0.0114	0	0.123	0	0	0.0448	0	0.0366	118	92	37	30	111	86	34	27	500625	6623	4928	0	6417	4722	0	206	0	0	276.13	3.65	2.72	0	0.0161	0.0109	0	0.114
PSEAE	1857270	27443	18980	0	25923	17460	0	1520	0	0	333.86	4.93	3.41	0	0.0175	0.0104	0	0.273	0	0	0.0581	0	0.0549	453	365	111	94	415	339	88	75	1662340	26509	17613	0	25032	16136	0	1477	0	0	329.96	5.26	3.5	0	0.0187	0.0107	0	0.293
PSHV1	39982	5232	328	0	5170	266	0	62	0	0	563.13	73.7	4.62	0	0.117	0.003	0	0.873	0	0	0.00808	0	0.274	59	31	2	2	59	31	2	2	39982	5232	328	0	5170	266	0	62	0	0	563.13	73.7	4.62	0	0.117	0.003	0	0.873
PUCGT	6249486	1441182	91980	359	1402881	53993	45	37987	314	0	395.34	91.2	5.82	0.0227	0.2	0.0124	4.72e-05	2.4	0.0199	0	0.023	0.000162	0.376	16057	8061	799	559	15920	7985	354	248	4371559	1114284	69057	184	1085326	40238	45	28819	139	0	419.82	107	6.63	0.0177	0.215	0.013	3.4e-05	2.77
PVCV1	2179	245	21	0	234	10	0	11	0	0	2179	245	21	0	0.112	0.00964	0	11	0	0	0.0449	0	0.524	3	1	0	0	3	1	0	0
PVMR	2781	96	0	0	96	0	0	0	0	0	463.5	16	0	0	0.0526	0	0	0	0	0	0	0	NaN	2	1	0	0	2	1	0	0
PVXX3	2104	110	21	0	110	21	0	0	0	0	420.8	22	4.2	0	0.0151	0.00288	0	0	0	0	0	0	0	2	1	0	0	2	1	0	0
PVYN	4049	55	0	0	55	0	0	0	0	0	2024.5	27.5	0	0	0.00898	0	0	0	0	0	0	0	NaN	1	1	0	0	1	1	0	0
PYFV1	3027	0	0	0	0	0	0	0	0	0	3027	0	0	0	0	0	0	0	0	0	NaN	NaN	NaN	0	0	0	0	0	0	0	0
PYRAE	654950	2851	7465	0	2755	7369	0	96	0	0	252.88	1.1	2.88	0	0.00571	0.0134	0	0.0371	0	0	0.0425	0	0.0127	50	49	65	52	47	46	63	50	599025	2704	6543	0	2608	6447	0	96	0	0	254.9	1.15	2.78	0	0.00541	0.0129	0	0.0409
PYRFU	577532	1064	10060	0	1001	9997	0	63	0	0	282.41	0.52	4.92	0	0.0026	0.0181	0	0.0308	0	0	0.0722	0	0.0071	25	23	64	41	23	21	63	40	536326	1024	9587	0	961	9524	0	63	0	0	284.22	0.543	5.08	0	0.00269	0.0185	0	0.0334
PYRKO	637680	3728	11331	0	3536	11139	0	192	0	0	277.13	1.62	4.92	0	0.00463	0.0204	0	0.0834	0	0	0.033	0	0.00831	69	65	91	68	67	63	89	67	600525	3654	10713	0	3462	10521	0	192	0	0	277.25	1.69	4.95	0	0.00477	0.0209	0	0.0886
PZSVT	2166	50	0	0	50	0	0	0	0	0	541.5	12.5	0	0	0.013	0	0	0	0	0	0	0	NaN	1	1	0	0	1	1	0	0
RABIT	13188114	2143007	387463	35117	2023098	302274	397	85189	34720	0	540.7	87.9	15.9	1.44	0.136	0.0246	0.00155	3.49	1.42	0	0.0422	0.00625	0.228	25224	10608	4171	1914	24170	10332	3164	1461	7071488	1323928	214873	17283	1260011	168071	168	46802	17115	0	562.88	105	17.1	1.38	0.16	0.0257	0.0016	3.73
RABVP	3615	112	0	0	112	0	0	0	0	0	723	22.4	0	0	0.0754	0	0	0	0	0	0	0	NaN	2	1	0	0	2	1	0	0
RAT	14445264	2352249	421005	29875	2218302	316679	254	104326	29621	0	528.11	86	15.4	1.09	0.132	0.0246	0.00131	3.81	1.08	0	0.0491	0.00605	0.27	27487	11385	4648	2276	26305	11023	3328	1594	7732932	1475167	233363	15636	1402060	175752	140	57611	15496	0	553.34	106	16.7	1.12	0.159	0.026	0.00118	4.12
RBDVR	2326	0	0	0	0	0	0	0	0	0	775.33	0	0	0	0	0	0	0	0	0	NaN	NaN	NaN	0	0	0	0	0	0	0	0
RCNMV	1423	81	0	0	81	0	0	0	0	0	474.33	27	0	0	0.0852	0	0	0	0	0	0	0	NaN	1	1	0	0	1	1	0	0
RDVF	7840	361	70	0	361	70	0	0	0	0	603.08	27.8	5.38	0	0.0848	0.0247	0	0	0	0	0	0	0	6	4	0	0	6	4	0	0	7840	361	70	0	361	70	0	0	0	0	603.08	27.8	5.38	0	0.0848	0.0247	0	0
REOVL	7734	207	77	0	186	56	0	21	0	0	703.09	18.8	7	0	0.0193	0.00856	0	1.91	0	0	0.0597	0	0.5	2	2	0	0	3	2	0	0	7734	207	77	0	186	56	0	21	0	0	703.09	18.8	7	0	0.0193	0.00856	0	1.91
RFVKA	46875	796	63	0	762	29	0	34	0	0	306.37	5.2	0.412	0	0.019	0.00283	0	0.222	0	0	0.08	0	0.54	14	10	0	0	12	8	0	0	45924	796	63	0	762	29	0	34	0	0	304.13	5.27	0.417	0	0.0192	0.00286	0	0.225
RGDV	7782	334	63	0	313	42	0	21	0	0	648.5	27.8	5.25	0	0.0961	0.00514	0	1.75	0	0	0.111	0	0.333	4	3	0	0	4	3	0	0	7782	334	63	0	313	42	0	21	0	0	648.5	27.8	5.25	0	0.0961	0.00514	0	1.75
RGMVD	3086	119	0	0	119	0	0	0	0	0	3086	119	0	0	0.0386	0	0	0	0	0	0	0	NaN	1	1	0	0	1	1	0	0
RHDVF	2461	0	21	0	0	21	0	0	0	0	1230.5	0	10.5	0	0	0.0897	0	0	0	0	NaN	NaN	0	0	0	0	0	0	0	0	0
RHIO9	5839211	544609	143498	0	501190	100079	0	43419	0	0	344.13	32.1	8.46	0	0.0861	0.022	0	2.56	0	0	0.0754	0	0.275	7854	4672	1424	1029	7320	4410	871	637	3343663	383235	97017	0	349481	63263	0	33754	0	0	346.92	39.8	10.1	0	0.106	0.0249	0	3.5
RHOBA	2290149	116720	20248	0	113262	16790	0	3458	0	0	314.97	16.1	2.78	0	0.0681	0.00664	0	0.476	0	0	0.0199	0	0.108	1986	1481	147	106	1944	1453	100	81	2168650	112346	19418	0	108911	15983	0	3435	0	0	315.58	16.3	2.83	0	0.0668	0.00669	0	0.5
RHORT	1292602	29183	8679	0	28404	7900	0	779	0	0	337.05	7.61	2.26	0	0.0265	0.0067	0	0.203	0	0	0.0205	0	0.0761	488	399	59	52	474	392	49	44	1212185	28129	8294	0	27463	7628	0	666	0	0	337.47	7.83	2.31	0	0.0272	0.00691	0	0.185
RHOS4	1334414	34420	10691	0	33130	9401	0	1290	0	0	314.72	8.12	2.52	0	0.0289	0.00841	0	0.304	0	0	0.0292	0	0.0758	538	420	69	55	518	410	54	46	1240356	33404	9718	0	32190	8504	0	1214	0	0	315.85	8.51	2.47	0	0.0305	0.00825	0	0.309
RICPR	279199	1296	3151	0	1170	3025	0	126	0	0	334.77	1.55	3.78	0	0.00533	0.0141	0	0.151	0	0	0.0925	0	0.0301	29	20	18	17	24	17	17	16	277100	1296	3151	0	1170	3025	0	126	0	0	335.07	1.57	3.81	0	0.00537	0.0142	0	0.152
ROTHC	5608	30	91	0	30	91	0	0	0	0	509.82	2.73	8.27	0	0.00309	0.032	0	0	0	0	0	0	0	1	1	0	0	1	1	0	0	5608	30	91	0	30	91	0	0	0	0	509.82	2.73	8.27	0	0.00309	0.032	0	0
ROTJ1	5679	0	138	0	0	138	0	0	0	0	516.27	0	12.5	0	0	0.0439	0	0	0	0	NaN	NaN	0	0	0	2	2	0	0	2	2	5679	0	138	0	0	138	0	0	0	0	516.27	0	12.5	0	0	0.0439	0	0
ROTSH	5897	81	119	0	81	119	0	0	0	0	491.42	6.75	9.92	0	0.0194	0.0294	0	0	0	0	0	0	0	2	2	0	0	2	2	0	0	5897	81	119	0	81	119	0	0	0	0	491.42	6.75	9.92	0	0.0194	0.0294	0	0
RRSVT	8422	234	21	0	234	21	0	0	0	0	765.64	21.3	1.91	0	0.0294	0.00154	0	0	0	0	0	0	0	6	4	0	0	6	4	0	0	8422	234	21	0	234	21	0	0	0	0	765.64	21.3	1.91	0	0.0294	0.00154	0	0
RSVSA	3033	250	0	0	250	0	0	0	0	0	758.25	62.5	0	0	0.0641	0	0	0	0	0	0	0	NaN	6	2	0	0	6	2	0	0
RSVT	4949	0	42	0	0	42	0	0	0	0	707	0	6	0	0	0.00206	0	0	0	0	NaN	NaN	0	0	0	0	0	0	0	0	0
RTBVP	2373	0	114	0	0	114	0	0	0	0	593.25	0	28.5	0	0	0.048	0	0	0	0	NaN	NaN	0	0	0	1	1	0	0	1	1
RTSVA	3473	147	49	0	144	46	0	3	0	0	3473	147	49	0	0.0423	0.0141	0	3	0	0	0.0204	0	0.0612	3	1	0	0	3	1	0	0
RUBVT	3179	305	21	0	284	0	0	21	0	0	1589.5	152	10.5	0	0.108	0.00988	0	10.5	0	0	0.0677	0	1	3	2	0	0	3	2	0	0
RVFVZ	3856	0	0	0	0	0	0	0	0	0	964	0	0	0	0	0	0	0	0	0	NaN	NaN	NaN	0	0	0	0	0	0	0	0
SALRD	1007991	73465	15571	0	69029	11135	0	4436	0	0	358.46	26.1	5.54	0	0.0772	0.0144	0	1.58	0	0	0.038	0	0.174	1348	888	125	92	1284	859	64	57	960255	69579	14430	0	65598	10449	0	3981	0	0	360.46	26.1	5.42	0	0.077	0.0144	0	1.49
SALTY	1420651	17597	12260	0	16192	10855	0	1405	0	0	313.4	3.88	2.7	0	0.0137	0.00928	0	0.31	0	0	0.0574	0	0.0693	293	230	59	51	273	218	49	43	1295415	16189	11325	0	14963	10099	0	1226	0	0	311.4	3.89	2.72	0	0.0136	0.00945	0	0.295
SARHA	11957955	1852094	383706	34185	1726636	292064	369	91642	33816	0	534.12	82.7	17.1	1.53	0.129	0.0276	0.00171	4.09	1.51	0	0.0557	0.00745	0.274	22103	9078	4190	2041	21189	8758	3066	1455	7118626	1241005	231762	16044	1166131	172727	205	59035	15839	0	541.92	94.5	17.6	1.22	0.152	0.0288	0.00143	4.49
SBMVA	1951	149	0	0	149	0	0	0	0	0	487.75	37.2	0	0	0.0788	0	0	0	0	0	0	0	NaN	3	3	0	0	3	3	0	0
SBWMN	3259	58	91	0	58	91	0	0	0	0	651.8	11.6	18.2	0	0.0355	0.0391	0	0	0	0	0	0	0	1	1	0	0	1	1	0	0
SCHMA	5593996	603668	115321	8032	575715	95334	66	19987	7966	0	477.67	51.5	9.85	0.686	0.0835	0.0171	0.000494	1.71	0.68	0	0.0332	0.00199	0.173	9026	3832	1092	549	8683	3747	900	471	4849192	520880	95722	6892	499833	81510	57	14212	6835	0	507.24	54.5	10	0.721	0.0832	0.0165	0.000481	1.49
SCHPO	2363896	222983	44669	0	213136	34822	0	9847	0	0	464.42	43.8	8.78	0	0.0867	0.0193	0	1.93	0	0	0.0517	0	0.235	2930	1545	379	243	2841	1487	279	170	2202942	218621	43259	0	208970	33608	0	9651	0	0	467.42	46.4	9.18	0	0.0911	0.02	0	2.05
SCLS1	5227922	967921	88922	373	930199	51388	185	37534	188	0	363.05	67.2	6.18	0.0259	0.139	0.0136	0.00025	2.61	0.0131	0	0.0366	0.000633	0.381	10698	5190	836	571	10484	5080	363	254	4839844	953960	85652	251	916807	48687	63	36965	188	0	362.26	71.4	6.41	0.0188	0.147	0.0137	0.000212	2.77
SCSVF	1595	30	0	0	30	0	0	0	0	0	199.38	3.75	0	0	0.0335	0	0	0	0	0	0	0	NaN	1	1	0	0	1	1	0	0
SCV20	829	0	0	0	0	0	0	0	0	0	829	0	0	0	0	0	0	0	0	0	NaN	NaN	NaN	0	0	0	0	0	0	0	0
SCVLA	2185	0	0	0	0	0	0	0	0	0	1092.5	0	0	0	0	0	0	0	0	0	NaN	NaN	NaN	0	0	0	0	0	0	0	0
SDVS5	3655	134	42	0	134	42	0	0	0	0	1827.5	67	21	0	0.0426	0.0117	0	0	0	0	0	0	0	2	1	0	0	2	1	0	0
SENDO	5710	1197	21	0	1197	21	0	0	0	0	634.44	133	2.33	0	0.342	0.00406	0	0	0	0	0	0	0	7	5	0	0	7	5	0	0
SFAVA	37551	1249	700	0	1240	691	0	9	0	0	305.29	10.2	5.69	0	0.0283	0.0196	0	0.0732	0	0	0.0173	0	0.0107	16	15	10	4	14	13	10	4	36827	1218	616	0	1211	609	0	7	0	0	304.36	10.1	5.09	0	0.0272	0.0156	0	0.0579
SFV	3685	162	21	0	162	21	0	0	0	0	1842.5	81	10.5	0	0.0528	0.00432	0	0	0	0	0	0	0	3	2	0	0	3	2	0	0
SFVCP	3577	376	28	0	376	28	0	0	0	0	715.4	75.2	5.6	0	0.116	0.00567	0	0	0	0	0	0	0	4	3	0	0	4	3	0	0
SHEON	1342432	14081	13501	22	13226	12646	22	855	0	0	330	3.46	3.32	0.00541	0.0116	0.0107	7.13e-06	0.21	0	0	0.049	0	0.0429	245	192	90	73	240	182	78	64	1275332	13508	13291	22	12653	12436	22	855	0	0	328.95	3.48	3.43	0.00567	0.0117	0.0111	7.48e-06	0.221
SHIDS	1094416	11713	10422	0	10865	9574	0	848	0	0	280.84	3.01	2.67	0	0.012	0.0112	0	0.218	0	0	0.053	0	0.0442	188	158	61	49	179	151	51	42	970790	11520	9356	0	10672	8508	0	848	0	0	296.24	3.52	2.86	0	0.0138	0.0107	0	0.259
SHV21	33202	1513	485	0	1322	294	0	191	0	0	442.69	20.2	6.47	0	0.0459	0.0162	0	2.55	0	0	0.0591	0	0.167	15	12	4	4	16	12	2	2	33202	1513	485	0	1322	294	0	191	0	0	442.69	20.2	6.47	0	0.0459	0.0162	0	2.55
SHVX	2832	295	21	0	274	0	0	21	0	0	472	49.2	3.5	0	0.0983	0.00921	0	3.5	0	0	0.0959	0	1	6	3	0	0	5	3	0	0
SIFVH	12208	66	172	0	66	172	0	0	0	0	167.23	0.904	2.36	0	0.0145	0.0184	0	0	0	0	0	0	0	2	2	2	2	2	2	2	2	12109	66	172	0	66	172	0	0	0	0	168.18	0.917	2.39	0	0.0147	0.0187	0	0
SINDV	6270	288	56	0	288	56	0	0	0	0	2090	96	18.7	0	0.0536	0.00743	0	0	0	0	0	0	0	5	3	0	0	5	3	0	0
SIRV1	8526	33	119	0	33	119	0	0	0	0	198.28	0.767	2.77	0	0.00586	0.0168	0	0	0	0	0	0	0	1	1	1	1	1	1	1	1	8285	33	119	0	33	119	0	0	0	0	197.26	0.786	2.83	0	0.006	0.0172	0	0
SJNNV	1398	168	21	0	168	21	0	0	0	0	466	56	7	0	0.0845	0.0933	0	0	0	0	0	0	0	2	2	0	0	2	2	0	0
SOCMV	2639	94	85	0	94	85	0	0	0	0	293.22	10.4	9.44	0	0.11	0.0295	0	0	0	0	0	0	0	2	2	1	1	2	2	1	1
SOLLC	12001708	1060614	184778	28	1021770	145962	0	38816	28	0	344.52	30.4	5.3	0.000804	0.0812	0.014	2.94e-06	1.11	0.000804	0	0.0391	1.46e-05	0.208	14988	8513	1631	1122	14487	8268	1148	748	6495513	716712	118577	28	688904	90797	0	27780	28	0	354.69	39.1	6.48	0.00153	0.0967	0.0155	5.6e-06	1.52
SOLTU	15884567	1627814	246531	0	1574798	193515	0	53016	0	0	299.08	30.6	4.64	0	0.107	0.0151	0	0.998	0	0	0.0319	0	0.214	23676	14739	1874	1401	23011	14391	1346	978	6111611	773684	109538	0	746440	82294	0	27244	0	0	314.45	39.8	5.64	0	0.122	0.0155	0	1.4
SORBI	12615212	1518831	174879	95	1478747	134795	95	40084	0	0	384.66	46.3	5.33	0.0029	0.122	0.0139	8.32e-06	1.22	0	0	0.0264	0	0.227	21156	12046	1615	1152	20707	11853	1080	738	6777753	1059516	114086	95	1031593	86163	95	27923	0	0	402.41	62.9	6.77	0.00564	0.165	0.0161	1.62e-05	1.66
SOYBN	25995254	2418437	436247	0	2339057	356867	0	79380	0	0	402.01	37.4	6.75	0	0.082	0.0151	0	1.23	0	0	0.0331	0	0.19	34468	18250	4032	2627	33498	17840	3085	1932	6655787	725306	120281	0	699786	94761	0	25520	0	0	379.38	41.3	6.86	0	0.092	0.0145	0	1.45
SPETR	10264285	1659890	306290	31470	1559150	236723	297	69567	31173	0	514.09	83.1	15.3	1.58	0.13	0.0262	0.00157	3.48	1.56	0	0.0477	0.00704	0.252	19517	8175	3363	1685	18767	7928	2462	1200	7073847	1315731	222679	18240	1245713	170711	190	51968	18050	0	547.72	102	17.2	1.41	0.153	0.0286	0.00135	4.02
SPMMV	3456	0	21	0	0	21	0	0	0	0	3456	0	21	0	0	0.00608	0	0	0	0	NaN	NaN	0	0	0	0	0	0	0	0	0
SPTNK	4848	353	273	154	182	251	5	22	149	0	230.86	16.8	13	7.33	0.0763	0.0873	0.0253	1.05	7.1	0	0.157	0.265	0.0698	4	4	5	4	3	3	5	4	4848	353	273	154	182	251	5	22	149	0	230.86	16.8	13	7.33	0.0763	0.0873	0.0253	1.05
SPV1C	2197	0	0	0	0	0	0	0	0	0	169	0	0	0	0	0	0	0	0	0	NaN	NaN	NaN	0	0	0	0	0	0	0	0	2197	0	0	0	0	0	0	0	0	0	169	0	0	0	0	0	0	0
SPV1R	2176	0	0	0	0	0	0	0	0	0	181.33	0	0	0	0	0	0	0	0	0	NaN	NaN	NaN	0	0	0	0	0	0	0	0	2176	0	0	0	0	0	0	0	0	0	181.33	0	0	0	0	0	0	0
SPV4	1423	38	21	0	38	21	0	0	0	0	158.11	4.22	2.33	0	0.111	0.0157	0	0	0	0	0	0	0	1	1	0	0	1	1	0	0
SSDRV	1700	0	0	0	0	0	0	0	0	0	1700	0	0	0	0	0	0	0	0	0	NaN	NaN	NaN	0	0	0	0	0	0	0	0
SSV1	4952	0	215	0	0	215	0	0	0	0	145.65	0	6.32	0	0	0.0433	0	0	0	0	NaN	NaN	0	0	0	4	4	0	0	4	4	4860	0	215	0	0	215	0	0	0	0	147.27	0	6.52	0	0	0.0446	0	0
STAA8	797321	31633	13987	31	28364	10749	0	3238	31	0	275.99	10.9	4.84	0.0107	0.0242	0.0154	2.75e-05	1.12	0.0107	0	0.117	0.00382	0.114	347	198	105	71	312	171	73	53	746117	30091	13374	31	26888	10202	0	3172	31	0	279.65	11.3	5.01	0.0116	0.0228	0.0153	2.98e-05	1.19
STRCO	2629320	182126	14924	161	177061	10020	0	4904	161	0	327.11	22.7	1.86	0.02	0.0728	0.0051	0.000107	0.61	0.02	0	0.0159	0.000792	0.186	2898	2072	115	77	2852	2044	50	43	2255756	172043	13697	161	167145	8960	0	4737	161	0	325.88	24.9	1.98	0.0233	0.0802	0.00543	0.000124	0.684
STRPU	13953726	2324390	319948	8613	2179847	183705	313	136243	8300	0	489.42	81.5	11.2	0.302	0.128	0.0214	0.000597	4.78	0.291	0	0.0618	0.00253	0.358	23303	10746	3312	1836	22174	10328	1516	948	8927365	1891604	230952	6804	1780183	126062	273	104890	6531	0	548.3	116	14.2	0.418	0.166	0.0234	0.000739	6.44
STRR6	586642	10380	8615	639	8817	7691	0	924	639	0	289.13	5.12	4.25	0.315	0.0109	0.0138	0.000123	0.455	0.315	0	0.098	0.00376	0.0518	129	85	64	46	120	78	49	38	556056	9537	8105	639	8196	7403	0	702	639	0	297.67	5.11	4.34	0.342	0.011	0.0142	0.000134	0.376
SULSO	827798	1174	10644	0	1127	10597	0	47	0	0	281.76	0.4	3.62	0	0.0027	0.015	0	0.016	0	0	0.0305	0	0.00577	25	25	63	48	24	24	63	48	698181	1035	7989	0	988	7942	0	47	0	0	290.91	0.431	3.33	0	0.00303	0.0128	0	0.0196
SV40	1681	96	0	0	96	0	0	0	0	0	280.17	16	0	0	0.0326	0	0	0	0	0	0	0	NaN	2	2	0	0	2	2	0	0
SVSAP	2606	110	21	0	110	21	0	0	0	0	868.67	36.7	7	0	0.129	0.0424	0	0	0	0	0	0	0	2	2	0	0	2	2	0	0
SWPV1	46268	327	180	0	323	176	0	4	0	0	316.9	2.24	1.23	0	0.0104	0.00588	0	0.0274	0	0	0.0222	0	0.0204	5	4	1	1	5	4	1	1	45999	327	180	0	323	176	0	4	0	0	317.23	2.26	1.24	0	0.0105	0.00592	0	0.0276
SYNY3	1122758	19904	14222	0	18944	13262	0	960	0	0	320.15	5.68	4.06	0	0.0175	0.0119	0	0.274	0	0	0.0519	0	0.0519	302	230	117	91	288	219	106	84	1040982	19388	13057	0	18473	12142	0	915	0	0	327.25	6.09	4.1	0	0.0186	0.0118	0	0.288
TACVF	3370	0	28	0	0	28	0	0	0	0	842.5	0	7	0	0	0.0123	0	0	0	0	NaN	NaN	0	0	0	0	0	0	0	0	0
TAEGU	8160757	1040428	267751	23042	959257	209499	123	58252	22919	0	449.85	57.4	14.8	1.27	0.107	0.0294	0.00207	3.21	1.26	0	0.0618	0.00996	0.228	13172	5959	2863	1444	12445	5673	2167	1066	5507084	806913	192353	15458	747275	148077	96	44276	15362	0	505.52	74.1	17.7	1.42	0.13	0.0332	0.00157	4.06
TAKRU	30302607	4410249	916226	241172	3923827	669964	1012	246262	240160	0	633.2	92.2	19.1	5.04	0.122	0.0271	0.00433	5.15	5.02	0	0.0576	0.0146	0.249	51108	20924	9971	4820	48102	20219	6718	3453	7013070	1155340	222025	25849	1066273	158549	258	63476	25591	0	593.37	97.8	18.8	2.19	0.136	0.0269	0.00202	5.37
TASV1	3381	47	133	0	47	133	0	0	0	0	1127	15.7	44.3	0	0.0233	0.039	0	0	0	0	0	0	0	1	1	0	0	1	1	0	0
TBSVC	1567	32	0	0	32	0	0	0	0	0	391.75	8	0	0	0.0465	0	0	0	0	0	0	0	NaN	1	1	0	0	1	1	0	0
TETNG	12622263	1770753	361086	71373	1608647	269859	494	91227	70879	0	545.66	76.5	15.6	3.09	0.118	0.0246	0.00305	3.94	3.06	0	0.0503	0.0122	0.223	21458	9349	3862	1843	20082	9028	2722	1399	6307152	1000151	179119	20081	933921	132711	259	46408	19822	0	534.96	84.8	15.2	1.7	0.134	0.0241	0.00194	3.94
TETTS	16031229	1934512	794339	280	1735978	596008	77	198331	203	0	649.09	78.3	32.2	0.0113	0.0917	0.0426	1.3e-05	8.03	0.00822	0	0.114	0.000222	0.236	25714	9019	7114	3641	23993	8408	5135	2561	13031748	1873322	732230	186	1683333	542361	66	189869	120	0	671.57	96.5	37.7	0.00959	0.111	0.0485	1.19e-05	9.78
THAPS	5824029	959804	99932	0	925846	65974	0	33958	0	0	497.02	81.9	8.53	0	0.131	0.0155	0	2.9	0	0	0.0363	0	0.328	12460	5049	888	578	12103	4951	485	334	5236995	922788	92992	0	890090	60294	0	32698	0	0	513.58	90.5	9.12	0	0.143	0.0163	0	3.21
THEAC	453225	1029	3780	0	866	3617	0	163	0	0	305.82	0.694	2.55	0	0.00332	0.00928	0	0.11	0	0	0.159	0	0.0479	23	22	35	23	17	17	34	22	441445	1029	3759	0	866	3596	0	163	0	0	304.44	0.71	2.59	0	0.00339	0.00945	0	0.112
THEAN	2024948	143049	34276	48	137052	28279	48	5997	0	0	534.29	37.7	9.04	0.0127	0.0629	0.0171	2.04e-05	1.58	0	0	0.0435	0	0.156	2008	1077	272	191	1924	1044	203	146	1839163	132054	33360	48	126198	27504	48	5856	0	0	523.23	37.6	9.49	0.0137	0.0633	0.018	2.2e-05	1.67
THEAS	566890	5265	6620	0	5200	6555	0	65	0	0	326.36	3.03	3.81	0	0.0115	0.0115	0	0.0374	0	0	0.0166	0	0.00878	98	91	47	37	94	88	45	35	548475	5084	6441	0	5019	6376	0	65	0	0	326.28	3.02	3.83	0	0.0116	0.0117	0	0.0387
THEEB	769931	10159	11281	19	9773	10895	19	386	0	0	314.13	4.14	4.6	0.00775	0.0134	0.0135	8.52e-05	0.157	0	0	0.0357	0	0.0311	174	134	96	64	162	129	92	61	709203	10002	10054	19	9645	9697	19	357	0	0	312.84	4.41	4.43	0.00838	0.0142	0.0134	9.21e-05	0.157
THEMA	582801	1670	12058	0	1627	12015	0	43	0	0	314.69	0.902	6.51	0	0.00626	0.0198	0	0.0232	0	0	0.037	0	0.00667	30	27	90	63	28	25	90	63	550111	1670	11407	0	1627	11364	0	43	0	0	314.17	0.954	6.51	0	0.00663	0.0202	0	0.0246
THEPA	1895349	148598	28459	29	143269	23159	0	5300	29	0	465.57	36.5	6.99	0.00712	0.0698	0.0159	2.65e-05	1.3	0.00712	0	0.0349	0.0002	0.167	1987	1117	219	158	1929	1089	163	123	1767273	137036	27720	29	131859	22572	0	5148	29	0	463.24	35.9	7.27	0.0076	0.0682	0.0167	2.83e-05	1.35
THEPD	544134	1965	7909	0	1873	7817	0	92	0	0	290.05	1.05	4.22	0	0.00567	0.0192	0	0.049	0	0	0.0649	0	0.0167	34	34	61	46	32	32	60	45	514965	1929	7182	0	1837	7090	0	92	0	0	291.43	1.09	4.06	0	0.00576	0.017	0	0.0521
THET8	663962	6151	10724	0	5958	10531	0	193	0	0	298.14	2.76	4.82	0	0.0135	0.0155	0	0.0867	0	0	0.0381	0	0.0164	108	100	87	58	103	95	85	57	623852	5696	10503	0	5503	10310	0	193	0	0	301.23	2.75	5.07	0	0.0124	0.0161	0	0.0932
THEYD	608875	1554	11766	0	1491	11703	0	63	0	0	307.2	0.784	5.94	0	0.00448	0.0211	0	0.0318	0	0	0.0334	0	0.00719	34	31	86	64	31	30	85	63	583511	1554	11402	0	1491	11339	0	63	0	0	308.9	0.823	6.04	0	0.0047	0.0214	0	0.0334
THOGV	3637	0	0	0	0	0	0	0	0	0	519.57	0	0	0	0	0	0	0	0	0	NaN	NaN	NaN	0	0	0	0	0	0	0	0
TMV	2043	0	0	0	0	0	0	0	0	0	681	0	0	0	0	0	0	0	0	0	NaN	NaN	NaN	0	0	0	0	0	0	0	0
TNVA	1187	61	0	0	61	0	0	0	0	0	237.4	12.2	0	0	0.169	0	0	0	0	0	0	0	NaN	1	1	0	0	1	1	0	0
TOBSV	2625	103	0	0	103	0	0	0	0	0	525	20.6	0	0	0.0711	0	0	0	0	0	0	0	NaN	3	3	0	0	3	3	0	0
TORVR	4474	106	0	0	106	0	0	0	0	0	1118.5	26.5	0	0	0.0141	0	0	0	0	0	0	0	NaN	2	1	0	0	2	1	0	0
TOTV	3543	0	56	0	0	56	0	0	0	0	1181	0	18.7	0	0	0.0656	0	0	0	0	NaN	NaN	0	0	0	1	1	0	0	1	1
TOXGO	5481678	1713321	138715	339	1648967	74700	0	64015	339	0	699.1	219	17.7	0.0432	0.237	0.0245	3.03e-05	8.16	0.0432	0	0.0431	5.79e-05	0.473	20026	5049	1345	743	19777	4966	623	338	5378854	1697144	136277	339	1633576	73048	0	63229	339	0	709.99	224	18	0.0447	0.242	0.0248	3.14e-05	8.35
TPCTV	1065	100	21	0	100	21	0	0	0	0	177.5	16.7	3.5	0	0.157	0.0365	0	0	0	0	0	0	0	2	2	0	0	2	2	0	0
TRIAD	5222991	374211	99044	815	354481	80129	0	18915	815	0	453.38	32.5	8.6	0.0707	0.0633	0.0179	6.98e-05	1.64	0.0707	0	0.0525	0.000639	0.179	4871	2575	911	601	4634	2484	673	452	4402293	365898	92095	764	346991	73952	0	18143	764	0	470.33	39.1	9.84	0.0816	0.0751	0.0205	6.72e-05	1.94
TRIVA	17055435	1311561	628927	694	1116103	433910	253	195017	441	0	339.81	26.1	12.5	0.0138	0.0753	0.032	1.38e-05	3.89	0.00879	0	0.0948	0.00135	0.189	16160	10599	6089	2876	14295	9765	4096	2197	9113720	877345	471978	38	712888	307554	5	164424	33	0	491.7	47.3	25.5	0.00205	0.0866	0.0431	2e-06	8.87
TRVPP	2950	0	21	0	0	21	0	0	0	0	491.67	0	3.5	0	0	0.00205	0	0	0	0	NaN	NaN	0	0	0	0	0	0	0	0	0
TRYB2	4345560	479162	126307	0	446136	93281	0	33026	0	0	506.06	55.8	14.7	0	0.0981	0.023	0	3.85	0	0	0.05	0	0.201	6721	3268	1230	594	6270	3166	861	460	3962929	454218	116710	0	424815	87307	0	29403	0	0	508	58.2	15	0	0.102	0.0234	0	3.77
TSWV1	5033	0	25	0	0	25	0	0	0	0	1006.6	0	5	0	0	0.0166	0	0	0	0	NaN	NaN	0	0	0	0	0	0	0	0	0
TTV1K	4377	93	21	0	93	21	0	0	0	0	118.3	2.51	0.568	0	0.00698	0.00389	0	0	0	0	0	0	0	2	1	0	0	2	1	0	0	4377	93	21	0	93	21	0	0	0	0	118.3	2.51	0.568	0	0.00698	0.00389	0	0
TTVA1	972	110	0	0	110	0	0	0	0	0	486	55	0	0	0.218	0	0	0	0	0	0	0	NaN	2	2	0	0	2	2	0	0
TTVB1	883	152	0	0	152	0	0	0	0	0	294.33	50.7	0	0	0.324	0	0	0	0	0	0	0	NaN	3	2	0	0	3	2	0	0
TTVD1	775	307	0	0	307	0	0	0	0	0	258.33	102	0	0	0.509	0	0	0	0	0	0	0	NaN	4	3	0	0	4	3	0	0
TTVE1	1041	266	21	0	245	0	0	21	0	0	260.25	66.5	5.25	0	0.397	0.00737	0	5.25	0	0	0.125	0	1	3	3	0	0	2	2	0	0
TTVF1	772	127	0	0	127	0	0	0	0	0	257.33	42.3	0	0	0.151	0	0	0	0	0	0	0	NaN	2	2	0	0	2	2	0	0
TTVG1	932	73	42	0	73	42	0	0	0	0	466	36.5	21	0	0.141	0.0561	0	0	0	0	0	0	0	1	1	0	0	1	1	0	0
TTVI1	932	143	0	0	143	0	0	0	0	0	310.67	47.7	0	0	0.168	0	0	0	0	0	0	0	NaN	2	2	0	0	2	2	0	0
TTVT1	920	401	0	0	401	0	0	0	0	0	306.67	134	0	0	0.586	0	0	0	0	0	0	0	NaN	6	3	0	0	6	3	0	0
TTVZ1	1001	357	0	0	357	0	0	0	0	0	333.67	119	0	0	0.609	0	0	0	0	0	0	0	NaN	4	3	0	0	4	3	0	0
TUBMM	3279832	658006	59169	0	635413	36576	0	22593	0	0	437.66	87.8	7.9	0	0.167	0.0149	0	3.01	0	0	0.0299	0	0.36	7003	3415	547	339	6886	3376	281	175	3146744	651846	58063	0	629470	35687	0	22376	0	0	442.46	91.7	8.16	0	0.174	0.0152	0	3.15
TYMV	2661	825	0	0	825	0	0	0	0	0	887	275	0	0	0.361	0	0	0	0	0	0	0	NaN	3	2	0	0	3	2	0	0
USTMA	4000743	947775	64540	190	918415	35290	80	29250	110	0	610.99	145	9.86	0.029	0.193	0.0143	6.89e-05	4.47	0.0168	0	0.0294	0.000199	0.438	10700	3756	588	367	10570	3728	241	137	3870101	935024	63792	190	905761	34639	80	29153	110	0	617.93	149	10.2	0.0303	0.198	0.0147	7.2e-05	4.65
UUKS	3638	0	21	0	0	21	0	0	0	0	909.5	0	5.25	0	0	0.00521	0	0	0	0	NaN	NaN	0	0	0	0	0	0	0	0	0
VACCW	56795	1179	672	0	1132	625	0	47	0	0	261.73	5.43	3.1	0	0.0268	0.012	0	0.217	0	0	0.0205	0	0.118	20	16	6	2	19	16	6	2	56134	1179	672	0	1132	625	0	47	0	0	261.09	5.48	3.13	0	0.0271	0.0121	0	0.219
VAR67	54427	962	541	0	913	492	0	49	0	0	273.5	4.83	2.72	0	0.0191	0.0124	0	0.246	0	0	0.0216	0	0.154	16	13	2	1	16	13	2	1	53767	962	541	0	913	492	0	49	0	0	272.93	4.88	2.75	0	0.0193	0.0126	0	0.249
VESVA	2692	123	0	0	123	0	0	0	0	0	897.33	41	0	0	0.0218	0	0	0	0	0	0	0	NaN	2	1	0	0	2	1	0	0
VIBCH	1153846	11810	14218	0	10780	13188	0	1030	0	0	304.93	3.12	3.76	0	0.0109	0.0114	0	0.272	0	0	0.068	0	0.0428	198	158	80	67	183	145	67	56	1103558	11557	13653	0	10557	12653	0	1000	0	0	306.88	3.21	3.8	0	0.0113	0.0115	0	0.278
VIBF1	1236819	13927	14692	0	12765	13530	0	1162	0	0	324.37	3.65	3.85	0	0.0104	0.0116	0	0.305	0	0	0.0765	0	0.0493	232	174	87	76	214	161	74	67	1165785	13033	13826	0	11951	12744	0	1082	0	0	323.29	3.61	3.83	0	0.0104	0.0117	0	0.3
VITVI	10756843	838337	152267	81	810350	124356	5	27911	76	0	360.53	28.1	5.1	0.00271	0.0704	0.0123	5.03e-06	0.935	0.00255	0	0.0329	6.77e-05	0.182	12237	6825	1287	865	11891	6653	949	615	5869070	628499	101525	53	607320	80394	5	21131	48	0	366.27	39.2	6.34	0.00331	0.0918	0.014	5.93e-06	1.32
VSIVA	3603	71	0	0	71	0	0	0	0	0	600.5	11.8	0	0	0.0447	0	0	0	0	0	0	0	NaN	1	1	0	0	1	1	0	0
VZVD	35782	2585	122	0	2564	101	0	21	0	0	518.58	37.5	1.77	0	0.0756	0.00345	0	0.304	0	0	0.00875	0	0.2	36	20	1	1	35	20	1	1	35782	2585	122	0	2564	101	0	21	0	0	518.58	37.5	1.77	0	0.0756	0.00345	0	0.304
WBV24	13035	809	63	0	809	63	0	0	0	0	2607	162	12.6	0	0.12	0.00498	0	0	0	0	0	0	0	9	3	0	0	9	3	0	0
WCCVB	1103	66	0	0	66	0	0	0	0	0	551.5	33	0	0	0.0678	0	0	0	0	0	0	0	NaN	1	1	0	0	1	1	0	0
WDSV	4217	438	85	0	396	43	0	42	0	0	702.83	73	14.2	0	0.0804	0.0321	0	7	0	0	0.0782	0	0.667	8	3	1	1	8	3	1	1
WSSVS	124910	11691	2702	541	9954	1506	0	1196	541	0	234.79	22	5.08	1.02	0.0498	0.0126	0.000604	2.25	1.02	0	0.0848	0.00554	0.317	144	80	22	18	141	76	12	10	122664	11691	2632	541	9954	1436	0	1196	541	0	236.8	22.6	5.08	1.04	0.0511	0.0124	0.00062	2.31
XANCP	1418660	40061	10133	0	38606	8678	0	1455	0	0	343.75	9.71	2.46	0	0.0337	0.00744	0	0.353	0	0	0.0325	0	0.109	668	514	68	57	642	499	51	44	1324654	37571	9064	0	36296	7789	0	1275	0	0	342.82	9.72	2.35	0	0.0331	0.00683	0	0.33
XENTR	12595279	1576888	366344	31585	1469223	289492	772	76852	30813	0	536.24	67.1	15.6	1.34	0.105	0.0246	0.00149	3.27	1.31	0	0.0503	0.00927	0.218	19830	8675	3996	1932	18717	8376	3055	1485	6786855	972821	206569	13639	915740	162857	270	43712	13369	0	583.26	83.6	17.8	1.17	0.121	0.0263	0.00122	3.76
XMRV6	2914	576	60	0	516	0	0	60	0	0	971.33	192	20	0	0.229	0.0244	0	20	0	0	0.0769	0	1	8	3	2	2	8	3	0	0
YARLI	3092655	541619	65303	85	511628	35397	0	29906	85	0	482.1	84.4	10.2	0.0133	0.151	0.0209	1.94e-05	4.66	0.0133	0	0.0574	0.00013	0.404	5539	2802	615	415	5411	2718	262	184	2794003	531044	63541	85	501403	33985	0	29556	85	0	482.81	91.8	11	0.0147	0.164	0.0226	2.15e-05	5.11
YEAST	3012350	388090	58463	0	372174	42547	0	15916	0	0	454.42	58.5	8.82	0	0.1	0.0176	0	2.4	0	0	0.0457	0	0.263	4816	2281	510	350	4686	2224	321	198	2569360	331355	55297	0	316162	40104	0	15193	0	0	448.8	57.9	9.66	0	0.102	0.0191	0	2.65
YEFV1	3411	30	0	0	30	0	0	0	0	0	3411	30	0	0	0.0088	0	0	0	0	0	0	0	NaN	1	1	0	0	1	1	0	0
YERPE	1243291	15568	10536	0	14720	9688	0	848	0	0	318.14	3.98	2.7	0	0.0128	0.00974	0	0.217	0	0	0.0537	0	0.0528	285	209	69	55	267	196	54	46	1165926	14677	10008	0	13876	9207	0	801	0	0	317.43	4	2.72	0	0.013	0.0097	0	0.218
YMTV5	42362	174	231	0	171	228	0	3	0	0	302.59	1.24	1.65	0	0.00726	0.00752	0	0.0214	0	0	0.00987	0	0.0143	4	4	1	1	4	4	1	1	42028	174	231	0	171	228	0	3	0	0	302.36	1.25	1.66	0	0.00731	0.00757	0	0.0216
[truncated: 13 more columns]

## Sheet: VSL2B-ncoils
ORG	ALLRES	IDP_RES	CC_RES	CLG_RES	PURE_IDP_RES	PURE_CC_RES	PURE_CLG_RES	CC_IDP	CLG_IDP	CC_CLG	RES_PERSEQ	IDP_PERSEQ	CC_PERSEQ	CLG_PERSEQ	IDP_PER_LEN_PERSEQ	CC_PER_LEN_PERSEQ	CLG_PER_LEN_PERSEQ	CC_IDP_PERSEQ	CLG_IDP_PERSEQ	CLG_CC_PERSEQ	CCIDP_PER_IDP_PERSEQ	CLGIDP_PER_IDP_PERSEQ	CCIDP_PER_CC_PERSEQ	IDP_SEG	IDP_SEGSQ	CC_SEG	CC_SEGSQ	PURE_IDP_SEG	PURE_IDP_SEGSQ	PURE_CC_SEG	PURE_CC_SEGSQ	ALLRES_40	IDP_RES_40	CC_RES_40	CLG_RES_40	PURE_IDP_RES_40	PURE_CC_RES_40	PURE_CLG_RES_40	CC_IDP_40	CLG_IDP_40	CC_CLG_40	RES_PERSEQ_40	IDP_PERSEQ_40	CC_PERSEQ_40	CLG_PERSEQ_40	IDP_PER_LEN_PERSEQ_40	CC_PER_LEN_PERSEQ_40	CLG_PER_LEN_PERSEQ_40	CC_IDP_PERSEQ_40
AADNV	1532	566	43	0	523	0	0	43	0	0	510.67	189	14.3	0	0.359	0.0178	0	14.3	0	0	0.0455	0	1	8	3	0	0	7	3	0	0
AAV2S	2601	594	0	0	594	0	0	0	0	0	520.2	119	0	0	0.207	0	0	0	0	0	0	0	NaN	11	5	0	0	11	5	0	0
ABLVB	3612	467	0	0	467	0	0	0	0	0	722.4	93.4	0	0	0.189	0	0	0	0	0	0	0	NaN	10	5	0	0	10	5	0	0
ABPVR	2902	212	0	0	212	0	0	0	0	0	967.33	70.7	0	0	0.163	0	0	0	0	0	0	0	NaN	5	3	0	0	5	3	0	0
ABVP	7181	693	114	0	621	42	0	72	0	0	132.98	12.8	2.11	0	0.0819	0.0203	0	1.33	0	0	0.108	0	0.5	14	12	1	1	12	10	0	0	7181	693	114	0	621	42	0	72	0	0	132.98	12.8	2.11	0	0.0819	0.0203	0	1.33
ACLSP	2537	390	0	0	390	0	0	0	0	0	845.67	130	0	0	0.185	0	0	0	0	0	0	0	NaN	4	2	0	0	4	2	0	0
ADE02	12874	4955	112	0	4868	25	0	87	0	0	286.09	110	2.49	0	0.435	0.0117	0	1.93	0	0	0.0339	0	0.72	51	36	2	2	50	35	0	0	12679	4830	112	0	4743	25	0	87	0	0	288.16	110	2.55	0	0.43	0.0119	0	1.98
ADEF1	8125	1056	84	0	997	25	0	59	0	0	353.26	45.9	3.65	0	0.196	0.019	0	2.57	0	0	0.0353	0	0.702	19	16	0	0	18	16	0	0	8018	1013	84	0	954	25	0	59	0	0	364.45	46	3.82	0	0.187	0.0199	0	2.68
ADEG1	12494	2258	42	0	2216	0	0	42	0	0	328.79	59.4	1.11	0	0.206	0.00366	0	1.11	0	0	0.0287	0	1	27	21	0	0	26	20	0	0	12494	2258	42	0	2216	0	0	42	0	0	328.79	59.4	1.11	0	0.206	0.00366	0	1.11
ADEO7	9187	1225	0	0	1225	0	0	0	0	0	306.23	40.8	0	0	0.16	0	0	0	0	0	0	0	NaN	20	15	0	0	20	15	0	0	8814	1166	0	0	1166	0	0	0	0	0	326.44	43.2	0	0	0.14	0	0	0
ADVG	1383	302	21	0	302	21	0	0	0	0	345.75	75.5	5.25	0	0.433	0.0089	0	0	0	0	0	0	0	6	4	0	0	6	4	0	0
AEDAE	7684696	2309297	170556	1220	2165427	27906	0	142650	1220	0	461.43	139	10.2	0.0733	0.269	0.0183	7.16e-05	8.57	0.0733	0	0.0466	0.000203	0.744	21565	10732	1706	951	21771	10553	74	70	5831795	1930658	136739	942	1815426	22449	0	114290	942	0	493.3	163	11.6	0.0797	0.297	0.0195	7.28e-05	9.67
AEVCA	2134	103	0	0	103	0	0	0	0	0	2134	103	0	0	0.0483	0	0	0	0	0	0	0	NaN	2	1	0	0	2	1	0	0
AFV1Y	6405	210	93	0	163	46	0	47	0	0	160.12	5.25	2.33	0	0.0287	0.0203	0	1.18	0	0	0.204	0	0.468	5	5	1	1	3	3	0	0	6357	210	93	0	163	46	0	47	0	0	163	5.38	2.38	0	0.0295	0.0208	0	1.21
AFV2P	9110	543	77	0	487	21	0	56	0	0	175.19	10.4	1.48	0	0.0542	0.0138	0	1.08	0	0	0.125	0	0.667	10	10	0	0	8	8	0	0	9110	543	77	0	487	21	0	56	0	0	175.19	10.4	1.48	0	0.0542	0.0138	0	1.08
AGRT5	1660808	130316	11355	0	123554	4593	0	6762	0	0	310.78	24.4	2.12	0	0.0856	0.00671	0	1.27	0	0	0.0384	0	0.497	2341	1713	61	55	2253	1653	5	5	1502253	121318	10267	0	114967	3916	0	6351	0	0	309.42	25	2.11	0	0.0886	0.00669	0	1.31
AHV2H	1317	169	0	0	169	0	0	0	0	0	658.5	84.5	0	0	0.129	0	0	0	0	0	0	0	NaN	3	2	0	0	3	2	0	0
AILME	11395861	3914814	333549	32605	3597626	48956	10	284593	32595	0	539.09	185	15.8	1.54	0.308	0.0243	0.00157	13.5	1.54	0	0.0525	0.00355	0.749	36067	15539	3651	1751	36119	15257	177	148	7593726	2856238	232961	17398	2636881	30992	10	201969	17388	0	561.67	211	17.2	1.29	0.344	0.0262	0.00141	14.9
AJECG	4155681	1397844	66428	69	1341363	10016	0	56412	69	0	451.02	152	7.21	0.00749	0.315	0.0136	2.07e-05	6.12	0.00749	0	0.029	5.38e-05	0.774	14392	6997	597	378	14509	6934	20	20	4016255	1381151	65547	69	1325240	9705	0	55842	69	0	452.79	156	7.39	0.00778	0.323	0.0138	2.15e-05	6.3
ALHV1	34799	5480	282	0	5317	119	0	163	0	0	497.13	78.3	4.03	0	0.157	0.00865	0	2.33	0	0	0.0248	0	0.483	45	31	2	2	46	31	0	0	34799	5480	282	0	5317	119	0	163	0	0	497.13	78.3	4.03	0	0.157	0.00865	0	2.33
AMEPV	71083	4531	1216	0	3753	438	0	778	0	0	255.69	16.3	4.37	0	0.0693	0.0159	0	2.8	0	0	0.163	0	0.509	71	57	11	11	60	50	1	1	67732	3959	840	0	3487	368	0	472	0	0	254.63	14.9	3.16	0	0.0636	0.0129	0	1.77
AMPQE	11680538	2697512	304725	12034	2418222	37413	56	267312	11978	0	392.74	90.7	10.2	0.405	0.216	0.0234	0.000831	8.99	0.403	0	0.0752	0.00263	0.779	30234	16990	3268	2007	29594	16351	52	51	6660650	1893191	188388	7061	1720299	22538	19	165850	7042	0	444.99	126	12.6	0.472	0.269	0.0248	0.000684	11.1
AMPV1	4353	938	21	0	917	0	0	21	0	0	483.67	104	2.33	0	0.271	0.00794	0	2.33	0	0	0.0129	0	1	9	7	0	0	9	7	0	0
AMVLE	2437	258	21	0	258	21	0	0	0	0	609.25	64.5	5.25	0	0.153	0.00466	0	0	0	0	0	0	0	7	4	0	0	7	4	0	0
ANOCA	10131784	3309478	317864	28605	3010345	47292	44	270572	28561	0	530.21	173	16.6	1.5	0.292	0.0277	0.00156	14.2	1.49	0	0.0631	0.00377	0.74	30814	13724	3467	1705	30576	13370	137	125	6811032	2343258	233076	15694	2127597	33082	27	199994	15667	0	558.69	192	19.1	1.29	0.311	0.031	0.00132	16.4
ANODA	5911342	2221543	125101	3297	2113005	19835	25	105266	3272	0	516.86	194	10.9	0.288	0.347	0.0176	0.000339	9.2	0.286	0	0.0371	0.000595	0.772	19720	8883	1203	742	20106	8789	55	52	5627809	2194145	122686	2808	2087817	19150	16	103536	2792	0	525.37	205	11.5	0.262	0.363	0.0183	0.000323	9.67
ANOGA	7037845	2332840	161020	3527	2194994	26701	0	134319	3527	0	538.39	178	12.3	0.27	0.278	0.019	0.00034	10.3	0.27	0	0.049	0.000629	0.748	19679	8682	1566	871	19947	8521	69	61	5788611	2038117	138565	2354	1919985	22787	0	115778	2354	0	561.51	198	13.4	0.228	0.301	0.0201	0.000284	11.2
APIME	5942177	1898769	180834	7297	1740615	29963	14	150871	7283	0	542.27	173	16.5	0.666	0.263	0.0246	0.000635	13.8	0.665	0	0.0663	0.00143	0.732	16590	7001	1690	877	16768	6796	73	68	5179731	1710274	155588	5790	1575392	26487	9	129101	5781	0	560.64	185	16.8	0.627	0.275	0.0254	0.000593	14
APRVF	7194	432	70	0	432	70	0	0	0	0	799.33	48	7.78	0	0.0747	0.00647	0	0	0	0	0	0	0	8	6	0	0	8	6	0	0
AQRVC	7609	681	49	0	653	21	0	28	0	0	634.08	56.8	4.08	0	0.112	0.0055	0	2.33	0	0	0.0122	0	0.571	10	7	0	0	11	7	0	0	7609	681	49	0	653	21	0	28	0	0	634.08	56.8	4.08	0	0.112	0.0055	0	2.33
AQRVG	7577	1030	21	0	1009	0	0	21	0	0	631.42	85.8	1.75	0	0.191	0.00238	0	1.75	0	0	0.00505	0	1	16	10	0	0	17	10	0	0	7577	1030	21	0	1009	0	0	21	0	0	631.42	85.8	1.75	0	0.191	0.00238	0	1.75
AQUAE	488962	34852	13357	0	26613	5118	0	8239	0	0	314.85	22.4	8.6	0	0.0766	0.0275	0	5.31	0	0	0.166	0	0.461	666	510	110	81	521	421	14	14	473754	33547	12889	0	25523	4865	0	8024	0	0	314.79	22.3	8.56	0	0.0767	0.0276	0	5.33
ARATH	12988977	3382579	232774	29	3191711	41935	0	190839	29	0	408.36	106	7.32	0.000912	0.264	0.0164	3.75e-06	6	0.000912	0	0.0396	1.2e-05	0.73	39742	21897	2154	1411	39483	21557	70	67	6162071	1891731	125159	29	1786574	20031	0	105128	29	0	402.17	123	8.17	0.00189	0.307	0.018	7.79e-06	6.86
ARCFU	660835	33776	10049	0	28386	4659	0	5390	0	0	275.58	14.1	4.19	0	0.0624	0.0168	0	2.25	0	0	0.104	0	0.382	698	608	75	50	603	532	5	5	607884	31244	9388	0	26204	4348	0	5040	0	0	275.93	14.2	4.26	0	0.0621	0.0173	0	2.29
ASFB7	49803	3603	238	0	3556	191	0	47	0	0	334.25	24.2	1.6	0	0.102	0.00355	0	0.315	0	0	0.00402	0	0.272	54	46	1	1	54	46	1	1	45275	3603	238	0	3556	191	0	47	0	0	332.9	26.5	1.75	0	0.112	0.00389	0	0.346
ASGVP	2425	331	0	0	331	0	0	0	0	0	1212.5	166	0	0	0.195	0	0	0	0	0	0	0	NaN	5	2	0	0	5	2	0	0
ASHGO	2330700	569459	44518	0	534318	9377	0	35141	0	0	489.64	120	9.35	0	0.241	0.0201	0	7.38	0	0	0.0523	0	0.702	6315	3319	396	275	6225	3236	19	19	2255986	562200	43712	0	527522	9034	0	34678	0	0	491.71	123	9.53	0	0.247	0.0204	0	7.56
ASPFU	4742739	1347433	74581	210	1284828	12186	0	62395	210	0	491.53	140	7.73	0.0218	0.267	0.0143	0.000102	6.47	0.0218	0	0.0319	0.000165	0.738	14086	6940	683	421	14213	6873	19	19	4366533	1311749	73249	210	1249892	11602	0	61647	210	0	495.3	149	8.31	0.0238	0.284	0.0153	0.000111	6.99
ASPVP	3010	311	0	0	311	0	0	0	0	0	602	62.2	0	0	0.113	0	0	0	0	0	0	0	NaN	3	2	0	0	3	2	0	0
ATV	19264	3033	490	0	2777	234	0	256	0	0	267.56	42.1	6.81	0	0.0953	0.0135	0	3.56	0	0	0.101	0	0.535	36	21	0	0	32	20	0	0	18073	2871	445	0	2660	234	0	211	0	0	265.78	42.2	6.54	0	0.0946	0.0126	0	3.1
BABBO	1850772	346769	25783	0	328575	7589	0	18194	0	0	501.97	94.1	6.99	0	0.185	0.014	0	4.93	0	0	0.0404	0	0.597	4636	2340	196	147	4501	2295	16	16	1665251	305374	22563	0	289699	6888	0	15675	0	0	495.61	90.9	6.72	0	0.184	0.0143	0	4.67
BACAN	1439306	98767	22023	696	85900	9850	2	12173	694	0	262.03	18	4.01	0.127	0.0746	0.0148	0.00038	2.22	0.126	0	0.092	0.00324	0.421	1778	1324	139	104	1572	1204	17	15	1267270	89048	20245	594	77314	9103	2	11142	592	0	259.26	18.2	4.14	0.122	0.076	0.0152	0.000336	2.28
BACCR	1453967	108383	22209	2284	93733	9843	0	12366	2284	0	277.47	20.7	4.24	0.436	0.0736	0.0161	0.000827	2.36	0.436	0	0.0966	0.00609	0.437	1832	1286	142	110	1627	1157	15	15	1267079	94144	20249	1750	81110	8965	0	11284	1750	0	273.43	20.3	4.37	0.378	0.0738	0.0165	0.000657	2.44
BACSU	1230988	102971	18275	0	92592	7896	0	10379	0	0	293.16	24.5	4.35	0	0.0926	0.0161	0	2.47	0	0	0.0839	0	0.45	1852	1310	109	88	1680	1201	11	11	1103278	95238	16834	0	85350	6946	0	9888	0	0	288.67	24.9	4.4	0	0.0955	0.0166	0	2.59
BACTN	1864427	82582	16757	87	74733	8995	0	7762	87	0	389.88	17.3	3.5	0.0182	0.05	0.00984	1.46e-05	1.62	0.0182	0	0.079	0.000804	0.376	1643	1269	89	82	1468	1163	15	15	1573896	72356	14905	87	65217	7853	0	7052	87	0	381.09	17.5	3.61	0.0211	0.0519	0.0102	1.69e-05	1.71
BATDJ	3887913	1015443	63302	97	966711	14667	0	48635	97	0	451.56	118	7.35	0.0113	0.25	0.0171	4.08e-05	5.65	0.0113	0	0.0412	0.000167	0.699	11291	5541	502	365	11118	5456	31	29	3284489	891635	52452	97	851187	12101	0	40351	97	0	480.54	130	7.67	0.0142	0.256	0.0155	5.14e-05	5.9
BAVJK	5924	364	49	0	321	6	0	43	0	0	493.67	30.3	4.08	0	0.07	0.0152	0	3.58	0	0	0.163	0	0.893	6	6	0	0	4	4	0	0	5924	364	49	0	321	6	0	43	0	0	493.67	30.3	4.08	0	0.07	0.0152	0	3.58
BAYMY	3300	385	21	0	371	7	0	14	0	0	1650	192	10.5	0	0.13	0.0118	0	7	0	0	0.0493	0	0.667	8	2	0	0	7	2	0	0
BBTVA	1023	137	0	0	137	0	0	0	0	0	146.14	19.6	0	0	0.111	0	0	0	0	0	0	0	NaN	3	3	0	0	3	3	0	0
BBWVS	2860	150	0	0	150	0	0	0	0	0	1430	75	0	0	0.0651	0	0	0	0	0	0	0	NaN	4	2	0	0	4	2	0	0
BCTVC	1196	232	0	0	232	0	0	0	0	0	170.86	33.1	0	0	0.289	0	0	0	0	0	0	0	NaN	4	4	0	0	4	4	0	0
BDVV	2927	256	0	0	256	0	0	0	0	0	585.4	51.2	0	0	0.203	0	0	0	0	0	0	0	NaN	5	3	0	0	5	3	0	0
BECN1	2435	351	0	0	351	0	0	0	0	0	1217.5	176	0	0	0.411	0	0	0	0	0	0	0	NaN	6	2	0	0	6	2	0	0
BEFVB	4809	462	56	0	434	28	0	28	0	0	400.75	38.5	4.67	0	0.0864	0.0121	0	2.33	0	0	0.0326	0	0.5	8	5	0	0	8	5	0	0	4809	462	56	0	434	28	0	28	0	0	400.75	38.5	4.67	0	0.0864	0.0121	0	2.33
BGYMJ	1755	288	0	0	288	0	0	0	0	0	195	32	0	0	0.201	0	0	0	0	0	0	0	NaN	5	4	0	0	5	4	0	0
BIFLO	638887	84912	5013	0	81227	1328	0	3685	0	0	370.37	49.2	2.91	0	0.136	0.00735	0	2.14	0	0	0.0336	0	0.638	1386	881	30	21	1342	857	0	0	612243	83183	4863	0	79643	1323	0	3540	0	0	369.71	50.2	2.94	0	0.139	0.00744	0	2.14
BMV	2275	275	21	0	254	0	0	21	0	0	568.75	68.8	5.25	0	0.122	0.00546	0	5.25	0	0	0.0446	0	1	6	3	0	0	6	3	0	0
BNYVS	4291	469	21	0	448	0	0	21	0	0	476.78	52.1	2.33	0	0.111	0.00338	0	2.33	0	0	0.0173	0	1	8	4	0	0	9	4	0	0
BOMMO	6003903	1845060	128982	5490	1734776	24172	16	104810	5474	0	406.3	125	8.73	0.372	0.272	0.018	0.000418	7.09	0.37	0	0.0461	0.000902	0.732	18350	9274	1206	695	18293	9066	64	61	5420915	1770861	124343	4225	1665105	22812	0	101531	4225	0	428.46	140	9.83	0.334	0.292	0.0196	0.000383	8.02
BORBU	381092	46414	11962	0	38091	3639	0	8323	0	0	295.65	36	9.28	0	0.132	0.0335	0	6.46	0	0	0.144	0	0.588	760	547	100	85	638	477	8	8	310717	31474	6854	0	27032	2412	0	4442	0	0	312.59	31.7	6.9	0	0.111	0.0221	0	4.47
BORPE	1065161	89766	6732	40	85631	2637	0	4095	40	0	326.64	27.5	2.06	0.0123	0.0877	0.00596	2.33e-05	1.26	0.0123	0	0.0333	0.0001	0.489	1648	1167	40	28	1593	1134	2	2	959672	84435	6178	40	80536	2319	0	3859	40	0	324.43	28.5	2.09	0.0135	0.0926	0.00612	2.57e-05	1.3
BOTVF	2198	570	0	0	570	0	0	0	0	0	1099	285	0	0	0.33	0	0	0	0	0	0	0	NaN	7	2	0	0	7	2	0	0
BOTVX	2351	553	0	0	553	0	0	0	0	0	470.2	111	0	0	0.315	0	0	0	0	0	0	0	NaN	6	4	0	0	6	4	0	0
BOVIN	12700801	4335403	377561	33340	3978731	54227	2	323334	33338	0	532.08	182	15.8	1.4	0.302	0.0246	0.00159	13.5	1.4	0	0.0535	0.00355	0.747	39785	17361	4123	1961	39909	17022	176	153	7675561	2931390	238642	19930	2704209	31389	2	207253	19928	0	580.73	222	18.1	1.51	0.345	0.0265	0.00159	15.7
BPCHP	1648	100	0	0	100	0	0	0	0	0	206	12.5	0	0	0.159	0	0	0	0	0	0	0	NaN	3	3	0	0	3	3	0	0
BPHC1	9882	1225	163	0	1113	51	0	112	0	0	241.02	29.9	3.98	0	0.107	0.0269	0	2.73	0	0	0.152	0	0.608	18	13	1	1	16	11	0	0	9882	1225	163	0	1113	51	0	112	0	0	241.02	29.9	3.98	0	0.107	0.0269	0	2.73
BPL2	3273	76	63	0	55	42	0	21	0	0	233.79	5.43	4.5	0	0.0486	0.0269	0	1.5	0	0	0.228	0	0.333	2	2	0	0	1	1	0	0	3273	76	63	0	55	42	0	21	0	0	233.79	5.43	4.5	0	0.0486	0.0269	0	1.5
BPLC2	6900	836	220	0	658	42	0	178	0	0	176.92	21.4	5.64	0	0.107	0.0229	0	4.56	0	0	0.19	0	0.714	14	11	1	1	13	9	0	0	6900	836	220	0	658	42	0	178	0	0	176.92	21.4	5.64	0	0.107	0.0229	0	4.56
BPM13	1945	236	0	0	236	0	0	0	0	0	216.11	26.2	0	0	0.0618	0	0	0	0	0	0	0	NaN	4	2	0	0	4	2	0	0
BPML5	15251	2126	147	0	1988	9	0	138	0	0	179.42	25	1.73	0	0.173	0.00726	0	1.62	0	0	0.0479	0	0.893	44	35	1	1	40	33	0	0	15251	2126	147	0	1988	9	0	138	0	0	179.42	25	1.73	0	0.173	0.00726	0	1.62
BPMS2	1143	31	0	0	31	0	0	0	0	0	285.75	7.75	0	0	0.103	0	0	0	0	0	0	0	NaN	1	1	0	0	1	1	0	0
BPMU	11133	1316	84	0	1276	44	0	40	0	0	214.1	25.3	1.62	0	0.122	0.0072	0	0.769	0	0	0.0239	0	0.476	25	18	0	0	24	18	0	0	11133	1316	84	0	1276	44	0	40	0	0	214.1	25.3	1.62	0	0.122	0.0072	0	0.769
BPMX1	1469	132	0	0	132	0	0	0	0	0	367.25	33	0	0	0.156	0	0	0	0	0	0	0	NaN	3	2	0	0	3	2	0	0
BPN15	14190	1900	252	0	1791	143	0	109	0	0	236.5	31.7	4.2	0	0.127	0.0193	0	1.82	0	0	0.0414	0	0.389	33	23	0	0	33	23	0	0	14053	1780	252	0	1671	143	0	109	0	0	238.19	30.2	4.27	0	0.114	0.0197	0	1.85
BPN4	22029	2116	389	0	1844	117	0	272	0	0	305.96	29.4	5.4	0	0.0769	0.0147	0	3.78	0	0	0.124	0	0.664	37	19	2	2	32	17	1	1	22029	2116	389	0	1844	117	0	272	0	0	305.96	29.4	5.4	0	0.0769	0.0147	0	3.78
BPP1	28126	4108	669	0	3607	168	0	501	0	0	255.69	37.3	6.08	0	0.113	0.0203	0	4.55	0	0	0.123	0	0.634	70	41	6	6	64	36	0	0	27687	4010	627	0	3549	166	0	461	0	0	256.36	37.1	5.81	0	0.111	0.0192	0	4.27
BPP2	10467	1083	77	0	1027	21	0	56	0	0	243.42	25.2	1.79	0	0.0941	0.00502	0	1.3	0	0	0.0358	0	0.667	18	14	0	0	19	14	0	0	10376	1083	77	0	1027	21	0	56	0	0	247.05	25.8	1.83	0	0.0964	0.00514	0	1.33
BPP22	12419	1821	154	0	1753	86	0	68	0	0	194.05	28.5	2.41	0	0.15	0.00941	0	1.06	0	0	0.0368	0	0.408	34	24	1	1	33	23	0	0	12419	1821	154	0	1753	86	0	68	0	0	194.05	28.5	2.41	0	0.15	0.00941	0	1.06
BPPH6	3573	90	21	0	90	21	0	0	0	0	274.85	6.92	1.62	0	0.0166	0.00243	0	0	0	0	0	0	0	2	2	0	0	2	2	0	0	3573	90	21	0	90	21	0	0	0	0	274.85	6.92	1.62	0	0.0166	0.00243	0	0
BPPHC	12454	2051	112	48	1933	42	0	70	48	0	234.98	38.7	2.11	0.906	0.153	0.00703	0.00147	1.32	0.906	0	0.0118	0.0163	0.5	39	22	0	0	37	22	0	0	12361	2020	112	48	1902	42	0	70	48	0	237.71	38.8	2.15	0.923	0.149	0.00716	0.0015	1.35
BPPHE	42234	5562	1445	0	4587	470	0	975	0	0	191.1	25.2	6.54	0	0.132	0.0429	0	4.41	0	0	0.18	0	0.627	90	70	14	12	76	54	3	3	41987	5519	1403	0	4586	470	0	933	0	0	191.72	25.2	6.41	0	0.132	0.0423	0	4.26
BPPHM	1677	536	56	0	501	21	0	35	0	0	152.45	48.7	5.09	0	0.507	0.022	0	3.18	0	0	0.0272	0	0.5	9	8	1	1	10	8	0	0	1677	536	56	0	501	21	0	35	0	0	152.45	48.7	5.09	0	0.507	0.022	0	3.18
BPPHS	1986	372	0	0	372	0	0	0	0	0	198.6	37.2	0	0	0.241	0	0	0	0	0	0	0	NaN	5	4	0	0	5	4	0	0	1986	372	0	0	372	0	0	0	0	0	198.6	37.2	0	0	0.241	0	0	0
BPPM2	3126	369	42	0	369	42	0	0	0	0	148.86	17.6	2	0	0.133	0.0204	0	0	0	0	0	0	0	6	5	0	0	6	5	0	0	3126	369	42	0	369	42	0	0	0	0	148.86	17.6	2	0	0.133	0.0204	0	0
BPPRD	4863	718	70	0	669	21	0	49	0	0	162.1	23.9	2.33	0	0.133	0.0193	0	1.63	0	0	0.0414	0	0.667	10	9	0	0	11	9	0	0	4809	718	70	0	669	21	0	49	0	0	165.83	24.8	2.41	0	0.137	0.02	0	1.69
BPSPB	38336	4995	1214	0	4163	382	0	832	0	0	207.22	27	6.56	0	0.0924	0.0246	0	4.5	0	0	0.0864	0	0.442	76	49	8	5	74	46	2	2	38336	4995	1214	0	4163	382	0	832	0	0	207.22	27	6.56	0	0.0924	0.0246	0	4.5
BPT4	53409	5326	649	0	4905	228	0	421	0	0	195.64	19.5	2.38	0	0.0913	0.0158	0	1.54	0	0	0.0902	0	0.636	98	81	5	5	88	72	1	1	52661	5296	649	0	4875	228	0	421	0	0	197.23	19.8	2.43	0	0.0928	0.0161	0	1.58
BPT5	32457	3760	716	0	3366	322	0	394	0	0	200.35	23.2	4.42	0	0.103	0.0252	0	2.43	0	0	0.0727	0	0.43	63	47	5	5	58	44	1	1	32287	3760	716	0	3366	322	0	394	0	0	200.54	23.4	4.45	0	0.103	0.0254	0	2.45
BPT7	12933	1994	133	0	1933	72	0	61	0	0	230.95	35.6	2.38	0	0.186	0.0197	0	1.09	0	0	0.0249	0	0.39	34	25	0	0	34	25	0	0	12458	1947	133	0	1886	72	0	61	0	0	230.7	36.1	2.46	0	0.186	0.0204	0	1.13
BPV3	2462	603	60	0	564	21	0	39	0	0	307.75	75.4	7.5	0	0.218	0.0386	0	4.88	0	0	0.0639	0	0.5	7	5	1	1	7	5	0	0
BPV5	2305	653	21	0	653	21	0	0	0	0	384.17	109	3.5	0	0.275	0.00559	0	0	0	0	0	0	0	10	5	0	0	10	5	0	0
BRADI	12772608	3506543	186414	0	3356808	36679	0	149735	0	0	426.58	117	6.23	0	0.288	0.014	0	5	0	0	0.0299	0	0.709	41159	22597	1670	1134	41037	22342	41	41	6782649	2231033	114069	0	2137377	20413	0	93656	0	0	433.29	143	7.29	0	0.349	0.0157	0	5.98
BRAFL	13248417	3808937	257087	15712	3573713	37547	28	219540	15684	0	464.14	133	9.01	0.55	0.27	0.0178	0.00139	7.69	0.549	0	0.0473	0.00449	0.759	38725	18506	2576	1594	38382	18070	60	59	8904304	2861535	198067	9326	2681251	27082	27	170985	9299	0	533.06	171	11.9	0.558	0.31	0.0215	0.00111	10.2
BRAJA	2616478	279490	17209	0	268897	6616	0	10593	0	0	317.03	33.9	2.09	0	0.118	0.00653	0	1.28	0	0	0.0277	0	0.534	4734	3375	92	75	4610	3313	12	12	2257987	251531	15367	0	242099	5935	0	9432	0	0	316.91	35.3	2.16	0	0.124	0.00683	0	1.32
BRV1	13577	777	0	0	777	0	0	0	0	0	2262.83	130	0	0	0.163	0	0	0	0	0	0	0	NaN	11	5	0	0	11	5	0	0
BSMV	3148	572	21	0	561	10	0	11	0	0	449.71	81.7	3	0	0.254	0.0196	0	1.57	0	0	0.0185	0	0.524	9	7	0	0	9	7	0	0
BSNV	2075	591	21	0	570	0	0	21	0	0	691.67	197	7	0	0.42	0.00655	0	7	0	0	0.0242	0	1	9	3	0	0	8	3	0	0
BSTV1	3093	249	49	0	249	49	0	0	0	0	3093	249	49	0	0.0805	0.0158	0	0	0	0	0	0	0	5	1	0	0	5	1	0	0
BTV10	6470	794	21	0	794	21	0	0	0	0	588.18	72.2	1.91	0	0.205	0.00212	0	0	0	0	0	0	0	9	6	0	0	9	6	0	0	6145	587	21	0	587	21	0	0	0	0	614.5	58.7	2.1	0	0.162	0.00233	0	0
BUCAI	188274	9820	1326	0	9170	676	0	650	0	0	329.15	17.2	2.32	0	0.0632	0.00859	0	1.14	0	0	0.0548	0	0.438	199	149	3	3	183	142	0	0	187955	9820	1326	0	9170	676	0	650	0	0	329.75	17.2	2.33	0	0.0635	0.00862	0	1.14
BUNL8	4031	208	21	0	187	0	0	21	0	0	1007.75	52	5.25	0	0.127	0.00232	0	5.25	0	0	0.0625	0	1	4	2	0	0	4	2	0	0
BUNYW	4005	210	0	0	210	0	0	0	0	0	1001.25	52.5	0	0	0.0257	0	0	0	0	0	0	0	NaN	4	2	0	0	4	2	0	0
BURPS	1988282	227926	12695	299	219938	5006	0	7689	299	0	347.78	39.9	2.22	0.0523	0.116	0.00688	0.000104	1.34	0.0523	0	0.028	0.00056	0.51	3687	2409	60	48	3582	2358	6	6	1757764	207528	11235	299	200387	4393	0	6842	299	0	343.78	40.6	2.2	0.0585	0.119	0.00678	0.000116	1.34
BVDVN	3988	208	0	0	208	0	0	0	0	0	3988	208	0	0	0.0522	0	0	0	0	0	0	0	NaN	4	1	0	0	4	1	0	0
BVY3	3491	497	0	0	497	0	0	0	0	0	3491	497	0	0	0.142	0	0	0	0	0	0	0	NaN	8	1	0	0	8	1	0	0
BYDVP	1988	521	46	0	521	46	0	0	0	0	331.33	86.8	7.67	0	0.257	0.00884	0	0	0	0	0	0	0	6	4	0	0	6	4	0	0
BYVU	5076	811	21	0	811	21	0	0	0	0	634.5	101	2.62	0	0.115	0.000848	0	0	0	0	0	0	0	15	5	0	0	15	5	0	0
CAEBR	8656306	2474957	198143	23536	2284091	30488	325	167655	23211	0	398.91	114	9.13	1.08	0.274	0.0197	0.00309	7.73	1.07	0	0.0524	0.00637	0.757	25372	13807	1887	1178	25384	13451	42	41	7176768	2170187	173993	10483	2011573	25537	325	148456	10158	0	424.11	128	10.3	0.619	0.287	0.0217	0.00157	8.77
CAEEL	11023695	3116199	253433	25841	2873154	36222	7	217211	25834	0	438.27	124	10.1	1.03	0.254	0.0181	0.00299	8.64	1.03	0	0.0498	0.00642	0.757	30878	15532	2473	1352	31092	15192	49	48	6735548	1941250	154909	9379	1800094	23125	7	131784	9372	0	430.17	124	9.89	0.599	0.269	0.0195	0.00157	8.42
CAEJA	10583859	2989944	240491	29531	2759557	39628	7	200863	29524	0	301.85	85.3	6.86	0.842	0.277	0.0185	0.00274	5.73	0.842	0	0.0496	0.00588	0.756	34069	20851	2180	1467	33830	20271	58	57	5945410	1766798	144534	9416	1635123	22270	5	122264	9411	0	346.41	103	8.42	0.549	0.288	0.0203	0.00156	7.12
CALJA	21481571	7707207	671295	63183	7070077	97321	27	573974	63156	0	511.3	183	16	1.5	0.331	0.0273	0.00173	13.7	1.5	0	0.0552	0.0038	0.754	71074	31908	7393	3622	71021	31288	312	276	7946020	3028519	237081	21029	2801785	31369	7	205712	21022	0	545.71	208	16.3	1.44	0.354	0.0259	0.00162	14.1
CAMJE	507643	37410	10076	0	31963	4629	0	5447	0	0	312.78	23	6.21	0	0.0839	0.0221	0	3.36	0	0	0.133	0	0.446	660	485	68	59	567	421	8	8	493410	35904	9901	0	30505	4502	0	5399	0	0	311.69	22.7	6.25	0	0.0841	0.0224	0	3.41
CAMVS	2303	868	56	0	812	0	0	56	0	0	383.83	145	9.33	0	0.41	0.0436	0	9.33	0	0	0.0957	0	1	10	6	0	0	10	6	0	0
CANAL	3836333	1143299	83560	57	1073285	13601	2	69959	55	0	421.16	126	9.17	0.00626	0.275	0.0184	4.57e-05	7.68	0.00604	0	0.0498	8.48e-05	0.761	11354	6226	764	542	11397	6110	20	20	2934833	882016	65358	0	827419	10761	0	54597	0	0	420.7	126	9.37	0	0.277	0.0186	0	7.83
CANFA	15284263	5682479	490472	47799	5212002	67781	13	422691	47786	0	578.49	215	18.6	1.81	0.34	0.0274	0.00174	16	1.81	0	0.0548	0.00345	0.756	49097	20430	5528	2489	49463	20069	245	219	8119522	3255623	250847	19286	3018336	32841	5	218006	19281	0	581.59	233	18	1.38	0.378	0.0272	0.00145	15.6
CARMS	1256	137	0	0	137	0	0	0	0	0	314	34.2	0	0	0.226	0	0	0	0	0	0	0	NaN	3	3	0	0	3	3	0	0
CAUCR	1205709	145845	7616	0	140897	2668	0	4948	0	0	324.12	39.2	2.05	0	0.138	0.00638	0	1.33	0	0	0.0248	0	0.569	2455	1697	45	39	2391	1666	6	6	1139715	139063	7224	0	134399	2560	0	4664	0	0	322.96	39.4	2.05	0	0.139	0.0065	0	1.32
CAVC1	786	337	0	0	337	0	0	0	0	0	262	112	0	0	0.562	0	0	0	0	0	0	0	NaN	6	3	0	0	6	3	0	0
CAVPO	10375650	3345473	279764	28336	3079717	42336	8	237428	28328	0	521.13	168	14.1	1.42	0.287	0.0226	0.00151	11.9	1.42	0	0.0511	0.00338	0.737	31849	14032	3022	1488	31775	13780	107	101	7159812	2562825	209464	17173	2366298	30108	2	179356	17171	0	558.27	200	16.3	1.34	0.325	0.0251	0.00128	14
CCHFI	6111	803	63	0	770	30	0	33	0	0	2037	268	21	0	0.1	0.0181	0	11	0	0	0.0317	0	0.393	11	2	0	0	9	2	0	0
CENSY	623942	93073	3690	191	90349	1157	0	2533	191	0	308.58	46	1.82	0.0945	0.16	0.0078	0.000202	1.25	0.0945	0	0.0257	0.000575	0.597	1528	946	20	16	1514	930	1	1	552340	80004	3226	191	77593	1006	0	2220	191	0	303.15	43.9	1.77	0.105	0.159	0.00702	0.000224	1.22
CFMVN	1872	396	0	0	396	0	0	0	0	0	468	99	0	0	0.211	0	0	0	0	0	0	0	NaN	6	3	0	0	6	3	0	0
CHICK	9823606	3244717	330073	31735	2927918	44702	307	285371	31428	0	557.4	184	18.7	1.8	0.304	0.028	0.00182	16.2	1.78	0	0.0595	0.00402	0.75	30649	13315	3531	1658	30617	13043	129	122	6509004	2310433	224695	17211	2098363	29533	303	195162	16908	0	573.43	204	19.8	1.52	0.326	0.029	0.00145	17.2
CHIKS	3722	530	28	0	502	0	0	28	0	0	1861	265	14	0	0.144	0.00566	0	14	0	0	0.0406	0	1	7	2	0	0	6	2	0	0
CHLAA	1405705	93986	14021	21	85883	5939	0	8082	21	0	365.12	24.4	3.64	0.00545	0.0658	0.0098	1.05e-05	2.1	0.00545	0	0.0681	5.29e-05	0.421	1616	1178	102	80	1494	1104	8	8	1319664	86806	12464	21	79911	5590	0	6874	21	0	367.8	24.2	3.47	0.00585	0.0643	0.00945	1.13e-05	1.92
CHLRE	6548670	2481267	130646	114	2365668	15161	0	115485	114	0	456.77	173	9.11	0.00795	0.329	0.0173	4.74e-05	8.06	0.00795	0	0.0359	7.31e-05	0.795	24620	10678	1307	697	24817	10532	23	22	5809459	2330542	122266	114	2221825	13663	0	108603	114	0	481.91	193	10.1	0.00946	0.354	0.0188	5.64e-05	9.01
CHLTE	631563	45805	6559	0	42127	2881	0	3678	0	0	280.69	20.4	2.92	0	0.093	0.00915	0	1.63	0	0	0.05	0	0.437	884	703	46	31	832	670	7	7	612798	45033	6345	0	41518	2830	0	3515	0	0	280.97	20.6	2.91	0	0.0942	0.00912	0	1.61
CHLTR	312168	29400	3951	0	26988	1539	0	2412	0	0	348.79	32.8	4.41	0	0.103	0.0148	0	2.69	0	0	0.0825	0	0.535	481	330	22	20	435	303	1	1	311200	29400	3951	0	26988	1539	0	2412	0	0	349.66	33	4.44	0	0.103	0.0149	0	2.71
CHPVE	3787	268	0	0	268	0	0	0	0	0	1893.5	134	0	0	0.116	0	0	0	0	0	0	0	NaN	7	2	0	0	7	2	0	0
CILVC	3953	258	21	0	258	21	0	0	0	0	658.83	43	3.5	0	0.104	0.0164	0	0	0	0	0	0	0	4	3	0	0	4	3	0	0
CIOIN	5767451	1431472	144957	9519	1298407	21389	22	123568	9497	0	333.22	82.7	8.38	0.55	0.242	0.021	0.00085	7.14	0.549	0	0.0568	0.00273	0.747	16343	9596	1544	857	16107	9325	47	46	4787876	1290331	124198	5091	1178308	17245	21	106953	5070	0	325.64	87.8	8.45	0.346	0.262	0.0221	0.000623	7.27
CIOSA	9644552	1952235	218353	41024	1730640	37699	83	180654	40941	0	482.13	97.6	10.9	2.05	0.233	0.0199	0.00206	9.03	2.05	0	0.0579	0.00459	0.69	23092	12325	2268	1130	22398	12007	90	89	3842061	988478	89545	4231	908592	13882	8	75663	4223	0	361.98	93.1	8.44	0.399	0.287	0.0216	0.000601	7.13
CLBVS	2687	317	21	0	296	0	0	21	0	0	895.67	106	7	0	0.2	0.0193	0	7	0	0	0.0631	0	1	5	3	0	0	5	3	0	0
CLOAB	1176635	90911	17022	0	80652	6763	0	10259	0	0	305.86	23.6	4.42	0	0.0786	0.0145	0	2.67	0	0	0.0922	0	0.491	1616	1155	123	93	1466	1059	13	12	1062185	82679	15650	0	73181	6152	0	9498	0	0	303.39	23.6	4.47	0	0.0798	0.0145	0	2.71
CLOBH	1052452	83101	19554	0	71604	8057	0	11497	0	0	293.16	23.1	5.45	0	0.0836	0.0184	0	3.2	0	0	0.111	0	0.476	1490	1066	122	101	1301	958	15	15	954990	77329	18401	0	66489	7561	0	10840	0	0	291.87	23.6	5.62	0	0.0855	0.0187	0	3.31
CMVFN	2457	409	0	0	409	0	0	0	0	0	491.4	81.8	0	0	0.26	0	0	0	0	0	0	0	NaN	7	5	0	0	7	5	0	0
COCIM	4212036	1347160	70871	0	1286615	10326	0	60545	0	0	433.96	139	7.3	0	0.309	0.0158	0	6.24	0	0	0.0343	0	0.776	14074	7226	646	423	14167	7143	8	8	3936947	1296964	65971	0	1240395	9402	0	56569	0	0	442.35	146	7.41	0	0.317	0.0147	0	6.36
COPC7	6160676	2044937	103072	40	1958732	16907	0	86165	40	0	461.99	153	7.73	0.003	0.307	0.0143	4.68e-06	6.46	0.003	0	0.0315	8.34e-06	0.739	19876	9945	974	686	20017	9836	38	38	5181052	1875280	94680	40	1794658	14098	0	80582	40	0	468.7	170	8.57	0.00362	0.334	0.0156	5.65e-06	7.29
COPV6	2357	741	42	0	699	0	0	42	0	0	336.71	106	6	0	0.353	0.0128	0	6	0	0	0.0435	0	1	10	6	0	0	10	6	0	0
CORGL	958275	93886	7200	236	88758	2273	35	4927	201	0	309.82	30.4	2.33	0.0763	0.102	0.0074	0.000121	1.59	0.065	0	0.0362	0.000785	0.591	1629	1183	51	37	1584	1151	3	3	914103	90194	6916	236	85322	2245	35	4671	201	0	311.56	30.7	2.36	0.0804	0.103	0.00733	0.000127	1.59
COXBU	512702	32157	6328	0	28396	2567	0	3761	0	0	282.48	17.7	3.49	0	0.084	0.0119	0	2.07	0	0	0.0776	0	0.473	595	465	51	39	542	431	5	5	500484	31599	6286	0	27838	2525	0	3761	0	0	285.5	18	3.59	0	0.0809	0.0123	0	2.15
COYMV	2221	713	165	0	561	13	0	152	0	0	740.33	238	55	0	0.33	0.145	0	50.7	0	0	0.344	0	0.845	9	3	3	2	8	2	0	0
CPMV1	809	0	0	0	0	0	0	0	0	0	809	0	0	0	0	0	0	0	0	0	NaN	NaN	NaN	0	0	0	0	0	0	0	0
CPMVS	4802	116	21	0	116	21	0	0	0	0	960.4	23.2	4.2	0	0.217	0.00225	0	0	0	0	0	0	0	3	3	0	0	3	3	0	0
CPRVZ	473	0	0	0	0	0	0	0	0	0	473	0	0	0	0	0	0	0	0	0	NaN	NaN	NaN	0	0	0	0	0	0	0	0
CPSVP	3537	586	91	0	518	23	0	68	0	0	884.25	146	22.8	0	0.236	0.0281	0	17	0	0	0.156	0	0.825	9	4	0	0	8	4	0	0
CPVKS	843	95	0	0	95	0	0	0	0	0	421.5	47.5	0	0	0.123	0	0	0	0	0	0	0	NaN	2	2	0	0	2	2	0	0
CRLVP	3210	314	0	0	314	0	0	0	0	0	1605	157	0	0	0.106	0	0	0	0	0	0	0	NaN	6	2	0	0	6	2	0	0
CRPVC	2666	204	63	0	193	52	0	11	0	0	1333	102	31.5	0	0.0673	0.0178	0	5.5	0	0	0.0325	0	0.175	4	2	0	0	3	2	0	0
CRPVK	2669	838	21	0	838	21	0	0	0	0	333.62	105	2.62	0	0.272	0.00673	0	0	0	0	0	0	0	8	6	0	0	8	6	0	0
CRYHO	1757638	469703	40023	40	437286	7646	0	32377	40	0	452.3	121	10.3	0.0103	0.26	0.0237	1.19e-05	8.33	0.0103	0	0.0573	2.44e-05	0.719	5542	2710	375	250	5447	2639	14	14	1740721	466894	39703	40	434748	7597	0	32106	40	0	454.97	122	10.4	0.0105	0.262	0.0239	1.21e-05	8.39
CRYNJ	3446667	1288940	64757	25	1232097	7939	0	56818	25	0	535.53	200	10.1	0.00388	0.345	0.0168	3.46e-06	8.83	0.00388	0	0.0349	6.49e-06	0.812	12034	5256	617	392	12224	5209	14	14	3187825	1231457	61950	25	1177031	7549	0	54401	25	0	543.44	210	10.6	0.00426	0.359	0.0175	3.8e-06	9.27
CSVMV	2541	720	188	0	560	28	0	160	0	0	508.2	144	37.6	0	0.175	0.0486	0	32	0	0	0.24	0	0.921	8	3	1	1	9	3	0	0
CTFVL	9623	795	49	0	795	49	0	0	0	0	740.23	61.2	3.77	0	0.114	0.00541	0	0	0	0	0	0	0	10	7	0	0	10	7	0	0	9286	795	49	0	795	49	0	0	0	0	773.83	66.2	4.08	0	0.123	0.00586	0	0
CVH22	12928	324	21	0	324	21	0	0	0	0	1616	40.5	2.62	0	0.0667	0.00224	0	0	0	0	0	0	0	4	3	0	0	4	3	0	0
CVHSA	14377	785	28	0	785	28	0	0	0	0	958.47	52.3	1.87	0	0.0521	0.00149	0	0	0	0	0	0	0	12	4	0	0	12	4	0	0	9995	551	28	0	551	28	0	0	0	0	713.93	39.4	2	0	0.052	0.00159	0	0
CVMA5	14869	924	91	0	882	49	0	42	0	0	1351.73	84	8.27	0	0.103	0.00406	0	3.82	0	0	0.0296	0	0.667	14	5	0	0	12	5	0	0	10401	655	70	0	634	49	0	21	0	0	1040.1	65.5	7	0	0.107	0.00399	0	2.1
DANRE	20446653	6980026	647612	57476	6353804	78800	65	568811	57410	0	501.82	171	15.9	1.41	0.312	0.0274	0.00171	14	1.41	0	0.0603	0.00362	0.776	64215	29592	6886	3461	64504	28937	202	171	8212303	3111999	271946	21165	2849222	30327	7	241619	21158	0	563.99	214	18.7	1.45	0.335	0.0286	0.00177	16.6
DAPPU	9947364	2842685	201221	14836	2664526	37867	31	163354	14805	0	330.07	94.3	6.68	0.492	0.279	0.0174	0.0015	5.42	0.491	0	0.0456	0.00307	0.737	31392	18480	1841	1284	31175	18018	68	66	6738843	2070875	137698	7359	1952030	26206	6	111492	7353	0	372.93	115	7.62	0.407	0.296	0.0171	0.00093	6.17
DEIRA	949308	141301	7112	25	136098	1934	0	5178	25	0	307.72	45.8	2.31	0.0081	0.152	0.00713	1.92e-05	1.68	0.0081	0	0.0257	0.000183	0.622	2333	1538	38	28	2281	1512	0	0	904498	137534	6937	25	132413	1841	0	5096	25	0	307.86	46.8	2.36	0.00851	0.155	0.00729	2.01e-05	1.73
DEN1W	3392	100	0	0	100	0	0	0	0	0	3392	100	0	0	0.0295	0	0	0	0	0	0	0	NaN	2	1	0	0	2	1	0	0
DESVH	1075413	120898	10038	32	114351	3523	0	6515	32	0	305.78	34.4	2.85	0.0091	0.125	0.00945	3.27e-05	1.85	0.0091	0	0.0445	9.26e-05	0.57	2004	1399	62	59	1912	1343	6	6	1014195	114715	9181	32	108819	3317	0	5864	32	0	305.76	34.6	2.77	0.00965	0.126	0.00938	3.47e-05	1.77
DHBVQ	1685	513	28	0	485	0	0	28	0	0	421.25	128	7	0	0.308	0.00888	0	7	0	0	0.0299	0	1	5	4	0	0	5	4	0	0
DICDI	6860265	2379165	278021	318	2121751	20925	0	257096	318	0	538.31	187	21.8	0.025	0.317	0.0347	1.88e-05	20.2	0.025	0	0.085	4.45e-05	0.865	21557	9483	2933	1898	22747	9228	28	28	5823568	2201951	262718	318	1956522	17607	0	245111	318	0	563.32	213	25.4	0.0308	0.342	0.0389	2.32e-05	23.7
DICTD	571687	22160	10088	0	17448	5376	0	4712	0	0	327.99	12.7	5.79	0	0.0451	0.0178	0	2.7	0	0	0.156	0	0.335	449	368	58	42	347	297	12	11	538801	21257	9749	0	16704	5196	0	4553	0	0	326.35	12.9	5.9	0	0.0452	0.018	0	2.76
DPV83	51100	3148	232	0	3018	102	0	130	0	0	309.7	19.1	1.41	0	0.0877	0.00501	0	0.788	0	0	0.0343	0	0.514	55	46	0	0	56	46	0	0	51100	3148	232	0	3018	102	0	130	0	0	309.7	19.1	1.41	0	0.0877	0.00501	0	0.788
DROME	12848190	5268466	359000	6109	4955272	51914	1	307086	6108	0	651.5	267	18.2	0.31	0.332	0.0223	0.000325	15.6	0.31	0	0.0485	0.00068	0.789	40159	14496	3438	1770	41449	14287	120	116	6765333	2630173	166348	2043	2486413	24631	0	141717	2043	0	563.97	219	13.9	0.17	0.33	0.021	0.000186	11.8
DROPS	8423158	3161658	201656	4603	2985276	29864	13	171792	4590	0	502.7	189	12	0.275	0.333	0.0197	0.000355	10.3	0.274	0	0.0436	0.000624	0.777	26455	11930	1932	1126	27163	11726	56	54	6729491	2641363	164195	1933	2499563	24318	10	139877	1923	0	522.68	205	12.8	0.15	0.354	0.0207	0.000231	10.9
DUGBA	6070	915	24	0	891	0	0	24	0	0	2023.33	305	8	0	0.127	0.00198	0	8	0	0	0.0119	0	1	15	3	0	0	14	3	0	0
DXV96	2266	549	21	0	528	0	0	21	0	0	755.33	183	7	0	0.36	0.00678	0	7	0	0	0.0248	0	1	7	3	0	0	7	3	0	0
EAVBU	4311	186	0	0	186	0	0	0	0	0	538.88	23.2	0	0	0.0644	0	0	0	0	0	0	0	NaN	3	2	0	0	3	2	0	0
EBLV1	3602	506	21	0	506	21	0	0	0	0	720.4	101	4.2	0	0.177	0.0141	0	0	0	0	0	0	0	11	4	0	0	11	4	0	0
EBLV2	3601	416	0	0	416	0	0	0	0	0	720.2	83.2	0	0	0.146	0	0	0	0	0	0	0	NaN	9	3	0	0	9	3	0	0
EBOZM	5494	929	52	0	906	29	0	23	0	0	610.44	103	5.78	0	0.203	0.00501	0	2.56	0	0	0.00981	0	0.479	11	8	0	0	10	8	0	0
EBVA8	40146	11645	297	0	11476	128	0	169	0	0	501.82	146	3.71	0	0.289	0.00822	0	2.11	0	0	0.0099	0	0.48	96	57	2	2	99	57	0	0	39801	11368	276	0	11199	107	0	169	0	0	503.81	144	3.49	0	0.282	0.00756	0	2.14
EBVB9	55127	22207	297	0	22038	128	0	169	0	0	467.18	188	2.52	0	0.429	0.00558	0	1.43	0	0	0.00638	0	0.48	138	90	2	2	138	90	0	0	42753	13844	276	0	13675	107	0	169	0	0	491.41	159	3.17	0	0.328	0.00687	0	1.94
ECOLI	1355945	71499	11407	0	65197	5105	0	6302	0	0	315.12	16.6	2.65	0	0.0595	0.00994	0	1.46	0	0	0.0694	0	0.442	1310	991	58	47	1229	927	5	5	1224993	65617	10334	0	59866	4583	0	5751	0	0	314.58	16.9	2.65	0	0.0597	0.00961	0	1.48
EHV2	36509	8201	200	0	8086	85	0	115	0	0	474.14	107	2.6	0	0.229	0.00246	0	1.49	0	0	0.00629	0	0.751	80	53	2	2	81	53	0	0	36173	7865	179	0	7771	85	0	94	0	0	475.96	103	2.36	0	0.219	0.00167	0	1.24
EMARV	3485	114	0	0	114	0	0	0	0	0	871.25	28.5	0	0	0.0379	0	0	0	0	0	0	0	NaN	3	2	0	0	3	2	0	0
EMCVR	2420	210	28	0	210	28	0	0	0	0	1210	105	14	0	0.499	0.00611	0	0	0	0	0	0	0	4	2	0	0	4	2	0	0
EMENI	5089040	1384817	76139	170	1321266	12758	0	63381	170	0	482.14	131	7.21	0.0161	0.26	0.0137	3.73e-05	6	0.0161	0	0.0325	5.84e-05	0.742	14800	7465	703	450	14904	7398	15	15	4616803	1337314	73360	170	1275806	12022	0	61338	170	0	485.01	140	7.71	0.0179	0.277	0.0144	4.13e-05	6.44
ENCCU	692194	105958	13963	0	95270	3275	0	10688	0	0	344.72	52.8	6.95	0	0.169	0.0198	0	5.32	0	0	0.0749	0	0.64	1482	1022	123	81	1402	957	6	6	657181	98486	12747	0	88819	3080	0	9667	0	0	345.7	51.8	6.71	0	0.167	0.0196	0	5.09
ENTFA	953522	80874	15792	85	70846	5849	0	9943	85	0	294.3	25	4.87	0.0262	0.0865	0.0163	9.21e-05	3.07	0.0262	0	0.0925	0.000844	0.471	1324	950	118	86	1206	861	10	10	865009	70799	14273	85	62055	5614	0	8659	85	0	293.52	24	4.84	0.0288	0.0845	0.0168	0.000101	2.94
ENTHI	3380165	639798	122387	0	536509	19098	0	103289	0	0	424.7	80.4	15.4	0	0.201	0.0354	0	13	0	0	0.117	0	0.732	7507	4752	1191	786	7179	4455	33	33	2705099	519937	105039	0	430136	15238	0	89801	0	0	448.53	86.2	17.4	0	0.207	0.038	0	14.9
FCVUR	2537	85	21	0	85	21	0	0	0	0	845.67	28.3	7	0	0.0161	0.066	0	0	0	0	0	0	0	2	1	0	0	2	1	0	0
FDVS	9186	658	91	0	588	21	0	70	0	0	765.5	54.8	7.58	0	0.0748	0.0084	0	5.83	0	0	0.0271	0	0.5	11	8	1	1	10	8	0	0	9186	658	91	0	588	21	0	70	0	0	765.5	54.8	7.58	0	0.0748	0.0084	0	5.83
FIPV	9371	471	0	0	471	0	0	0	0	0	937.1	47.1	0	0	0.0631	0	0	0	0	0	0	0	NaN	7	2	0	0	7	2	0	0	9371	471	0	0	471	0	0	0	0	0	937.1	47.1	0	0	0.0631	0	0	0
FLAPJ	805943	45216	9466	0	39888	4138	0	5328	0	0	333.03	18.7	3.91	0	0.0573	0.0116	0	2.2	0	0	0.0777	0	0.4	811	609	53	38	738	567	5	5	783362	43859	9279	0	38596	4016	0	5263	0	0	334.77	18.7	3.97	0	0.057	0.0118	0	2.25
FOWPN	80735	6233	813	0	5818	398	0	415	0	0	321.65	24.8	3.24	0	0.0607	0.0114	0	1.65	0	0	0.0849	0	0.416	88	59	3	3	82	53	0	0	74901	4957	736	0	4570	349	0	387	0	0	305.72	20.2	3	0	0.0593	0.0116	0	1.58
FRATT	473408	23501	5006	0	20987	2492	0	2514	0	0	309.82	15.4	3.28	0	0.062	0.0113	0	1.65	0	0	0.0878	0	0.413	442	347	28	25	397	319	4	4	465207	23110	4892	0	20631	2413	0	2479	0	0	310.34	15.4	3.26	0	0.0615	0.0113	0	1.65
FRG3G	28355	7004	195	45	6813	49	0	146	45	0	289.34	71.5	1.99	0.459	0.277	0.00728	0.0085	1.49	0.459	0	0.0276	0.0144	0.75	92	58	1	1	90	56	0	0	28355	7004	195	45	6813	49	0	146	45	0	289.34	71.5	1.99	0.459	0.277	0.00728	0.0085	1.49
FUSNN	641087	50064	13059	0	42717	5712	0	7347	0	0	313.34	24.5	6.38	0	0.078	0.0224	0	3.59	0	0	0.127	0	0.435	924	642	83	62	776	555	5	5	596044	45003	12352	0	37932	5281	0	7071	0	0	312.88	23.6	6.48	0	0.0773	0.0226	0	3.71
GAHVM	42491	7330	158	0	7242	70	0	88	0	0	472.12	81.4	1.76	0	0.205	0.00537	0	0.978	0	0	0.0159	0	0.541	93	59	2	2	92	58	0	0	42102	7182	126	0	7101	45	0	81	0	0	483.93	82.6	1.45	0	0.2	0.00319	0	0.931
GASAC	13490632	4004628	371165	45453	3638614	50596	8	320569	45445	0	495.11	147	13.6	1.67	0.281	0.0237	0.00168	11.8	1.67	0	0.0543	0.00374	0.756	41598	19869	3965	2028	41412	19455	142	123	6849569	2359554	196165	19833	2167429	23868	5	172297	19828	0	520.88	179	14.9	1.51	0.332	0.0244	0.00152	13.1
GEOSL	1142096	96368	13237	0	88025	4894	0	8343	0	0	335.71	28.3	3.89	0	0.0907	0.0123	0	2.45	0	0	0.0735	0	0.524	1719	1199	103	86	1578	1124	5	5	1065464	87171	12056	0	79582	4467	0	7589	0	0	336.21	27.5	3.8	0	0.0895	0.0122	0	2.39
GFKVM	2645	891	0	0	891	0	0	0	0	0	661.25	223	0	0	0.587	0	0	0	0	0	0	0	NaN	7	4	0	0	7	4	0	0
GIAIC	3226528	766789	90662	36	697982	21891	0	68771	36	0	451.01	107	12.7	0.00503	0.229	0.0199	9.93e-06	9.61	0.00503	0	0.0558	4.28e-05	0.655	9342	4148	1000	485	9026	4060	82	77	3003904	692326	88986	36	624487	21183	0	67803	36	0	465.58	107	13.8	0.00558	0.216	0.0214	1.1e-05	10.5
GIBZE	5835308	1599892	83920	85	1529497	13609	1	70311	84	0	445.31	122	6.4	0.00649	0.262	0.013	2.99e-05	5.37	0.00641	0	0.0309	0.000109	0.748	16852	9087	720	494	16963	8988	18	18	5411408	1557829	82390	85	1488341	12986	1	69404	84	0	446.78	129	6.8	0.00702	0.276	0.0138	3.23e-05	5.73
GLOVI	1377677	129031	13784	0	119802	4555	0	9229	0	0	312.68	29.3	3.13	0	0.102	0.0109	0	2.09	0	0	0.0624	0	0.577	2229	1620	108	95	2087	1522	7	7	1172232	111205	10996	0	104082	3873	0	7123	0	0	306.63	29.1	2.88	0	0.103	0.0102	0	1.86
GLRV3	7560	1011	0	0	1011	0	0	0	0	0	581.54	77.8	0	0	0.0415	0	0	0	0	0	0	0	NaN	13	3	0	0	13	3	0	0	5327	529	0	0	529	0	0	0	0	0	443.92	44.1	0	0	0.027	0	0	0
GLVWB	2793	116	0	0	116	0	0	0	0	0	1396.5	58	0	0	0.0479	0	0	0	0	0	0	0	NaN	2	2	0	0	2	2	0	0
GORGO	14626901	5281377	436178	41323	4868131	64090	165	372088	41158	0	536.06	194	16	1.51	0.333	0.0254	0.0015	13.6	1.51	0	0.0522	0.00316	0.754	48111	20814	4691	2255	48175	20417	224	190	7902214	3027888	233839	21044	2804094	31013	76	202826	20968	0	537.42	206	15.9	1.43	0.352	0.0252	0.00143	13.8
GRVMC	1350	314	0	0	314	0	0	0	0	0	450	105	0	0	0.335	0	0	0	0	0	0	0	NaN	5	3	0	0	5	3	0	0
GVAIS	2450	372	0	0	372	0	0	0	0	0	490	74.4	0	0	0.194	0	0	0	0	0	0	0	NaN	8	4	0	0	8	4	0	0
GVCPM	36936	4750	915	0	4086	251	0	664	0	0	258.29	33.2	6.4	0	0.133	0.0211	0	4.64	0	0	0.069	0	0.544	73	58	7	4	69	55	0	0	36672	4750	915	0	4086	251	0	664	0	0	260.09	33.7	6.49	0	0.135	0.0214	0	4.71
HAEIN	527691	28621	6214	0	25141	2734	0	3480	0	0	309.13	16.8	3.64	0	0.0574	0.0132	0	2.04	0	0	0.0964	0	0.449	521	390	44	39	467	354	3	3	514348	27720	6172	0	24282	2734	0	3438	0	0	308.92	16.6	3.71	0	0.0577	0.0135	0	2.06
HALSA	680106	129754	8963	0	122314	1523	0	7440	0	0	280.34	53.5	3.69	0	0.196	0.0111	0	3.07	0	0	0.0345	0	0.72	2160	1382	66	50	2094	1353	5	5	631111	121364	8227	0	114595	1458	0	6769	0	0	281.37	54.1	3.67	0	0.196	0.0109	0	3.02
HANTV	3715	249	28	0	221	0	0	28	0	0	1238.33	83	9.33	0	0.106	0.0218	0	9.33	0	0	0.0993	0	1	4	3	0	0	4	3	0	0
HASV	2508	588	0	0	588	0	0	0	0	0	836	196	0	0	0.4	0	0	0	0	0	0	0	NaN	8	3	0	0	8	3	0	0
HASV1	3157	639	98	0	591	50	0	48	0	0	1052.33	213	32.7	0	0.218	0.0288	0	16	0	0	0.0848	0	0.49	11	3	0	0	9	3	0	0
HAVHM	2227	161	21	0	161	21	0	0	0	0	2227	161	21	0	0.0723	0.00943	0	0	0	0	0	0	0	3	1	0	0	3	1	0	0
HBVCJ	1792	544	0	0	544	0	0	0	0	0	358.4	109	0	0	0.328	0	0	0	0	0	0	0	NaN	8	5	0	0	8	5	0	0
HCMVM	63402	15977	311	0	15774	108	0	203	0	0	377.39	95.1	1.85	0	0.237	0.00283	0	1.21	0	0	0.00786	0	0.734	195	114	1	1	199	114	1	1	62392	15660	311	0	15457	108	0	203	0	0	375.86	94.3	1.87	0	0.237	0.00286	0	1.22
HCVH	3173	413	21	0	413	21	0	0	0	0	1586.5	206	10.5	0	0.343	0.00349	0	0	0	0	0	0	0	6	2	0	0	6	2	0	0
HDVD3	409	409	126	0	283	0	0	126	0	0	204.5	204	63	0	1	0.309	0	63	0	0	0.309	0	1	2	2	2	2	4	2	0	0
HELPY	491826	49667	12057	0	41942	4332	0	7725	0	0	316.69	32	7.76	0	0.107	0.0271	0	4.97	0	0	0.132	0	0.538	809	545	90	78	722	484	8	8	468765	46842	11370	0	39539	4067	0	7303	0	0	313.98	31.4	7.62	0	0.106	0.0266	0	4.89
HENDH	6056	1498	21	0	1498	21	0	0	0	0	672.89	166	2.33	0	0.327	0.00427	0	0	0	0	0	0	0	14	6	0	0	14	6	0	0
HEVCH	2467	320	0	0	320	0	0	0	0	0	822.33	107	0	0	0.325	0	0	0	0	0	0	0	NaN	4	3	0	0	4	3	0	0
HHV11	38368	11050	189	37	10874	50	0	139	37	0	525.59	151	2.59	0.507	0.314	0.00249	0.00162	1.9	0.507	0	0.00637	0.00343	0.633	120	62	1	1	119	62	0	0	38368	11050	189	37	10874	50	0	139	37	0	525.59	151	2.59	0.507	0.314	0.00249	0.00162	1.9
HHV2H	39568	11993	182	0	11851	40	0	142	0	0	534.7	162	2.46	0	0.312	0.0024	0	1.92	0	0	0.0148	0	0.71	121	62	1	1	118	61	0	0	38743	11400	182	0	11258	40	0	142	0	0	530.73	156	2.49	0	0.306	0.00244	0	1.95
HHV6U	44715	8567	217	0	8415	65	0	152	0	0	434.13	83.2	2.11	0	0.183	0.00266	0	1.48	0	0	0.0191	0	0.771	86	48	1	1	84	47	0	0	43605	7779	217	0	7627	65	0	152	0	0	436.05	77.8	2.17	0	0.179	0.00274	0	1.52
HHV6Z	43610	7509	292	0	7294	77	0	215	0	0	449.59	77.4	3.01	0	0.173	0.00432	0	2.22	0	0	0.0374	0	0.737	85	42	2	2	81	40	0	0	43610	7509	292	0	7294	77	0	215	0	0	449.59	77.4	3.01	0	0.173	0.00432	0	2.22
HHV8P	38742	7338	510	0	6882	54	0	456	0	0	450.49	85.3	5.93	0	0.182	0.00908	0	5.3	0	0	0.0209	0	0.817	73	46	2	2	76	46	1	1	38360	7073	489	0	6638	54	0	435	0	0	456.67	84.2	5.82	0	0.175	0.00843	0	5.18
HIS1I	4432	658	57	0	601	0	0	57	0	0	126.63	18.8	1.63	0	0.118	0.0169	0	1.63	0	0	0.0985	0	1	13	11	1	1	11	9	0	0	4432	658	57	0	601	0	0	57	0	0	126.63	18.8	1.63	0	0.118	0.0169	0	1.63
HMPVC	4142	502	0	0	502	0	0	0	0	0	460.22	55.8	0	0	0.204	0	0	0	0	0	0	0	NaN	5	3	0	0	5	3	0	0
HORSE	12750829	4204963	452981	51815	3763312	63141	4	389840	51811	0	562.28	185	20	2.28	0.3	0.033	0.00204	17.2	2.28	0	0.0757	0.00438	0.761	39093	16434	5051	2595	38864	15902	194	170	7136019	2597128	230291	18101	2379611	30874	1	199417	18100	0	560.88	204	18.1	1.42	0.33	0.0277	0.00133	15.7
HPBVH	1310	232	42	0	190	0	0	42	0	0	436.67	77.3	14	0	0.308	0.0625	0	14	0	0	0.111	0	1	3	2	0	0	3	2	0	0
HPE2W	2179	102	0	0	102	0	0	0	0	0	2179	102	0	0	0.0468	0	0	0	0	0	0	0	NaN	2	1	0	0	2	1	0	0
HPV04	2459	620	0	0	620	0	0	0	0	0	351.29	88.6	0	0	0.234	0	0	0	0	0	0	0	NaN	9	5	0	0	9	5	0	0
HPV05	2827	947	42	0	926	21	0	21	0	0	353.38	118	5.25	0	0.335	0.00944	0	2.62	0	0	0.0239	0	0.5	8	5	0	0	9	5	0	0
HPV16	2452	508	0	0	508	0	0	0	0	0	306.5	63.5	0	0	0.259	0	0	0	0	0	0	0	NaN	8	7	0	0	8	7	0	0
HPV1A	2408	617	21	0	617	21	0	0	0	0	301	77.1	2.62	0	0.257	0.00655	0	0	0	0	0	0	0	8	5	0	0	8	5	0	0
HPV41	2763	783	21	0	762	0	0	21	0	0	251.18	71.2	1.91	0	0.3	0.0189	0	1.91	0	0	0.0297	0	1	12	7	0	0	12	7	0	0	2763	783	21	0	762	0	0	21	0	0	251.18	71.2	1.91	0	0.3	0.0189	0	1.91
HRSVB	4540	545	24	0	545	24	0	0	0	0	412.73	49.5	2.18	0	0.169	0.0038	0	0	0	0	0	0	0	6	5	0	0	6	5	0	0	4540	545	24	0	545	24	0	0	0	0	412.73	49.5	2.18	0	0.169	0.0038	0	0
HRV8A	2164	192	0	0	192	0	0	0	0	0	2164	192	0	0	0.0887	0	0	0	0	0	0	0	NaN	5	1	0	0	5	1	0	0
HTL1C	4121	1295	107	0	1192	4	0	103	0	0	457.89	144	11.9	0	0.412	0.0569	0	11.4	0	0	0.0871	0	0.963	14	7	1	1	14	7	0	0
HTL32	3469	811	0	0	811	0	0	0	0	0	578.17	135	0	0	0.311	0	0	0	0	0	0	0	NaN	10	5	0	0	10	5	0	0
HTLV2	3483	1021	0	0	1021	0	0	0	0	0	580.5	170	0	0	0.362	0	0	0	0	0	0	0	NaN	14	6	0	0	14	6	0	0
HUMAN	23391368	8357508	696904	53359	7707451	100150	56	596754	53303	0	339.32	121	10.1	0.774	0.321	0.0224	0.00108	8.66	0.773	0	0.0499	0.00251	0.759	81474	43627	7683	4015	81245	42622	314	267	8764696	3461611	262055	21038	3212677	34135	24	227920	21014	0	456.14	180	13.6	1.09	0.361	0.0206	0.00125	11.9
HV19S	1607	238	0	0	238	0	0	0	0	0	803.5	119	0	0	0.152	0	0	0	0	0	0	0	NaN	2	2	0	0	2	2	0	0
HV1H2	3550	596	112	0	519	35	0	77	0	0	394.44	66.2	12.4	0	0.267	0.0148	0	8.56	0	0	0.0722	0	0.558	9	6	2	2	8	6	0	0
HV2BE	3836	1079	0	0	1079	0	0	0	0	0	426.22	120	0	0	0.375	0	0	0	0	0	0	0	NaN	15	7	0	0	15	7	0	0
HYPBU	449830	24454	6454	0	20822	2822	0	3632	0	0	280.79	15.3	4.03	0	0.0653	0.0164	0	2.27	0	0	0.102	0	0.418	513	424	44	31	440	376	4	4	436943	23670	6318	0	20122	2770	0	3548	0	0	280.45	15.2	4.06	0	0.0646	0.0165	0	2.28
I34A1	4788	818	84	0	818	84	0	0	0	0	399	68.2	7	0	0.234	0.0269	0	0	0	0	0	0	0	13	9	0	0	13	9	0	0	4536	743	63	0	743	63	0	0	0	0	412.36	67.5	5.73	0	0.228	0.0218	0	0
I96A0	4809	645	56	0	645	56	0	0	0	0	400.75	53.8	4.67	0	0.148	0.0196	0	0	0	0	0	0	0	11	6	1	1	11	6	1	1	4557	645	56	0	645	56	0	0	0	0	414.27	58.6	5.09	0	0.162	0.0214	0	0
IBDVU	2040	394	21	0	379	6	0	15	0	0	680	131	7	0	0.343	0.00796	0	5	0	0	0.0272	0	0.714	6	3	0	0	6	3	0	0
IBVB	12752	710	0	0	710	0	0	0	0	0	1275.2	71	0	0	0.0821	0	0	0	0	0	0	0	NaN	11	3	0	0	11	3	0	0	8801	506	0	0	506	0	0	0	0	0	977.89	56.2	0	0	0.0855	0	0	0
ICHVA	33924	5807	476	0	5537	206	0	270	0	0	446.37	76.4	6.26	0	0.184	0.00749	0	3.55	0	0	0.023	0	0.367	70	45	2	2	68	44	0	0	33696	5807	476	0	5537	206	0	270	0	0	449.28	77.4	6.35	0	0.186	0.00759	0	3.6
ICRSV	2599	505	0	0	505	0	0	0	0	0	433.17	84.2	0	0	0.221	0	0	0	0	0	0	0	NaN	6	4	0	0	6	4	0	0
IHNVW	3421	380	21	0	380	21	0	0	0	0	570.17	63.3	3.5	0	0.145	0.00176	0	0	0	0	0	0	0	8	4	0	0	8	4	0	0
IIV3	43365	7136	553	0	6837	254	0	299	0	0	344.17	56.6	4.39	0	0.173	0.0092	0	2.37	0	0	0.0239	0	0.406	90	61	0	0	90	61	0	0	43365	7136	553	0	6837	254	0	299	0	0	344.17	56.6	4.39	0	0.173	0.0092	0	2.37
IIV6	77551	13269	1682	0	11981	394	0	1288	0	0	165.71	28.4	3.59	0	0.106	0.0145	0	2.75	0	0	0.111	0	0.738	204	126	17	15	186	114	0	0	74706	12826	1445	0	11764	383	0	1062	0	0	164.19	28.2	3.18	0	0.106	0.0135	0	2.33
INBLE	4718	469	28	0	469	28	0	0	0	0	428.91	42.6	2.55	0	0.127	0.00436	0	0	0	0	0	0	0	9	6	0	0	9	6	0	0	4718	469	28	0	469	28	0	0	0	0	428.91	42.6	2.55	0	0.127	0.00436	0	0
INCAA	4259	708	49	0	689	30	0	19	0	0	532.38	88.5	6.12	0	0.227	0.00873	0	2.38	0	0	0.0304	0	0.452	14	8	0	0	13	8	0	0
IPNVJ	1965	405	21	0	405	21	0	0	0	0	655	135	7	0	0.268	0.00828	0	0	0	0	0	0	0	6	3	0	0	6	3	0	0
ISAV8	4281	919	49	0	870	0	0	49	0	0	428.1	91.9	4.9	0	0.232	0.0209	0	4.9	0	0	0.0292	0	1	19	8	1	1	19	8	0	0	4281	919	49	0	870	0	0	49	0	0	428.1	91.9	4.9	0	0.232	0.0209	0	4.9
IXOSC	5815358	1574655	87353	3203	1499777	15678	0	71675	3203	0	284.05	76.9	4.27	0.156	0.277	0.012	0.000264	3.5	0.156	0	0.0321	0.000556	0.722	17846	11529	822	506	17709	11310	29	28	5020307	1496735	82737	2188	1425892	14082	0	68655	2188	0	299.36	89.3	4.93	0.13	0.314	0.0133	0.000259	4.09
JDNVP	1816	367	0	0	367	0	0	0	0	0	454	91.8	0	0	0.217	0	0	0	0	0	0	0	NaN	6	4	0	0	6	4	0	0
KORCO	475001	29252	6488	0	25228	2464	0	4024	0	0	296.5	18.3	4.05	0	0.0675	0.0161	0	2.51	0	0	0.0956	0	0.458	587	474	54	41	525	423	6	6	453960	27626	6013	0	23927	2314	0	3699	0	0	295.74	18	3.92	0	0.0662	0.0148	0	2.41
KORVE	1677413	161649	12929	0	153712	4992	0	7937	0	0	351.59	33.9	2.71	0	0.0991	0.00812	0	1.66	0	0	0.0416	0	0.525	2861	1898	73	64	2728	1832	7	7	1560627	151065	12430	0	143422	4787	0	7643	0	0	348.43	33.7	2.78	0	0.0996	0.00836	0	1.71
LACLA	656950	49948	9078	162	44642	3854	80	5224	82	0	295.26	22.4	4.08	0.0728	0.0741	0.0152	6.29e-05	2.35	0.0369	0	0.0859	0.00113	0.454	843	611	59	45	761	561	4	4	616564	47487	8631	162	42299	3525	80	5106	82	0	298.58	23	4.18	0.0785	0.0756	0.0148	6.78e-05	2.47
LACPL	934303	66492	6551	38	62344	2441	0	4110	38	0	302.56	21.5	2.12	0.0123	0.0647	0.00707	3.24e-05	1.33	0.0123	0	0.056	0.00062	0.535	994	689	37	29	939	651	3	3	834847	61584	5989	38	57781	2224	0	3765	38	0	301.82	22.3	2.17	0.0137	0.0656	0.00727	3.62e-05	1.36
LAMBD	14272	2508	267	0	2303	62	0	205	0	0	216.24	38	4.05	0	0.149	0.0195	0	3.11	0	0	0.102	0	0.742	36	25	1	1	34	22	0	0	14272	2508	267	0	2303	62	0	205	0	0	216.24	38	4.05	0	0.149	0.0195	0	3.11
LASSJ	3377	209	21	0	209	21	0	0	0	0	844.25	52.2	5.25	0	0.129	0.00237	0	0	0	0	0	0	0	6	3	0	0	6	3	0	0
LATCH	12139710	3550703	401119	30392	3179080	59850	38	341269	30354	0	517.99	152	17.1	1.3	0.254	0.0285	0.00154	14.6	1.3	0	0.0718	0.0039	0.727	34575	15869	4408	2164	34144	15400	166	155	7006810	2247331	240706	16160	2023601	33106	30	207600	16130	0	562.93	181	19.3	1.3	0.284	0.0295	0.00148	16.7
LBVAV	3592	383	0	0	383	0	0	0	0	0	598.67	63.8	0	0	0.142	0	0	0	0	0	0	0	NaN	6	3	0	0	6	3	0	0
LCDV1	459	39	0	0	39	0	0	0	0	0	459	39	0	0	0.085	0	0	0	0	0	0	0	NaN	1	1	0	0	1	1	0	0
LDCPR	7701	617	56	0	617	56	0	0	0	0	770.1	61.7	5.6	0	0.11	0.00521	0	0	0	0	0	0	0	9	7	1	1	9	7	1	1	7701	617	56	0	617	56	0	0	0	0	770.1	61.7	5.6	0	0.11	0.00521	0	0
LEIBR	5087935	1835891	124342	0	1728267	16718	0	107624	0	0	627.99	227	15.3	0	0.311	0.0217	0	13.3	0	0	0.0443	0	0.761	19129	6331	1070	542	19140	6250	30	29	4782972	1765768	114206	0	1667644	16082	0	98124	0	0	643.48	238	15.4	0	0.32	0.0219	0	13.2
LEIIN	5116889	1966618	131409	0	1851998	16789	0	114620	0	0	635.88	244	16.3	0	0.33	0.0234	0	14.2	0	0	0.0468	0	0.77	19597	6429	1192	581	19725	6339	21	21	4896743	1931969	126533	0	1821651	16215	0	110318	0	0	647.8	256	16.7	0	0.341	0.0239	0	14.6
LEIMA	5145570	1958096	131001	0	1843497	16402	0	114599	0	0	639.92	244	16.3	0	0.324	0.0226	0	14.3	0	0	0.0459	0	0.771	19590	6414	1206	570	19703	6327	27	27	4906956	1918329	127246	0	1806780	15697	0	111549	0	0	651.91	255	16.9	0	0.335	0.0234	0	14.8
LEPIN	1159747	102757	12575	0	95811	5629	0	6946	0	0	315.49	28	3.42	0	0.091	0.0103	0	1.89	0	0	0.0536	0	0.473	1865	1346	80	69	1743	1280	21	21	1086044	94890	11287	0	88234	4631	0	6656	0	0	315.16	27.5	3.28	0	0.0898	0.00953	0	1.93
LISMO	870843	62986	12397	0	56318	5729	0	6668	0	0	306.2	22.1	4.36	0	0.0726	0.0161	0	2.34	0	0	0.0866	0	0.412	1099	770	79	63	993	711	12	12	811875	60271	11903	0	53729	5361	0	6542	0	0	306.14	22.7	4.49	0	0.0744	0.0166	0	2.47
LIYV9	6620	473	42	0	473	42	0	0	0	0	735.56	52.6	4.67	0	0.0627	0.00223	0	0	0	0	0	0	0	8	4	0	0	8	4	0	0
LNYV3	3857	440	42	0	419	21	0	21	0	0	642.83	73.3	7	0	0.181	0.0193	0	3.5	0	0	0.0347	0	0.5	7	5	0	0	7	5	0	0
LOLV	2527	354	0	0	354	0	0	0	0	0	421.17	59	0	0	0.249	0	0	0	0	0	0	0	NaN	5	3	0	0	5	3	0	0
LOXAF	13857996	4582439	418252	38977	4185312	60100	2	358152	38975	0	541.01	179	16.3	1.52	0.291	0.0245	0.00161	14	1.52	0	0.0559	0.00379	0.744	42122	17975	4606	2110	42101	17635	192	170	7265815	2655984	224904	17420	2445376	31715	1	193189	17419	0	557.19	204	17.2	1.34	0.332	0.0263	0.00141	14.8
LRVLG	1687	60	0	0	60	0	0	0	0	0	562.33	20	0	0	0.027	0	0	0	0	0	0	0	NaN	1	1	0	0	1	1	0	0
LYCVA	3356	277	0	0	277	0	0	0	0	0	839	69.2	0	0	0.0611	0	0	0	0	0	0	0	NaN	5	2	0	0	5	2	0	0
MABVM	4873	913	45	0	894	26	0	19	0	0	696.14	130	6.43	0	0.222	0.00934	0	2.71	0	0	0.0123	0	0.396	8	5	0	0	8	5	0	0
MACMU	17042562	6042008	550779	55743	5510648	75081	81	475698	55662	0	479.56	170	15.5	1.57	0.319	0.0261	0.00185	13.4	1.57	0	0.0549	0.00373	0.762	56232	25974	6138	2916	56329	25465	248	209	7751097	2954550	235444	22091	2728064	31013	36	204431	22055	0	523.12	199	15.9	1.49	0.352	0.0247	0.00173	13.8
MBVLF	1454	240	0	0	240	0	0	0	0	0	363.5	60	0	0	0.123	0	0	0	0	0	0	0	NaN	3	2	0	0	3	2	0	0
MCMVK	1769	304	0	0	304	0	0	0	0	0	442.25	76	0	0	0.252	0	0	0	0	0	0	0	NaN	6	4	0	0	6	4	0	0
MCV1	54465	10599	350	29	10339	119	0	231	29	0	334.14	65	2.15	0.178	0.196	0.00608	0.000326	1.42	0.178	0	0.015	0.00208	0.6	123	87	1	1	124	86	0	0	54465	10599	350	29	10339	119	0	231	29	0	334.14	65	2.15	0.178	0.196	0.00608	0.000326	1.42
MDBVW	10188	1972	0	0	1972	0	0	0	0	0	192.23	37.2	0	0	0.147	0	0	0	0	0	0	0	NaN	22	14	0	0	22	14	0	0	6617	1171	0	0	1171	0	0	0	0	0	183.81	32.5	0	0	0.15	0	0	0
MEASC	5202	830	21	0	830	21	0	0	0	0	650.25	104	2.62	0	0.258	0.00477	0	0	0	0	0	0	0	9	5	0	0	9	5	0	0
MELGA	8776990	2726794	301155	33299	2436619	44242	37	256913	33262	0	530.75	165	18.2	2.01	0.277	0.0298	0.00227	15.5	2.01	0	0.0691	0.00508	0.732	26047	11687	3165	1514	25752	11345	128	120	5855700	1924380	202494	16667	1734465	29219	27	173275	16640	0	552.69	182	19.1	1.57	0.292	0.0299	0.00164	16.4
MESFL	245043	20512	5140	0	17421	2049	0	3091	0	0	358.77	30	7.53	0	0.0858	0.0219	0	4.53	0	0	0.12	0	0.469	353	247	34	28	312	217	5	5	234038	19778	4979	0	16791	1992	0	2987	0	0	354.6	30	7.54	0	0.0867	0.0218	0	4.53
METAC	1392324	119653	16994	0	109628	6969	0	10025	0	0	311.62	26.8	3.8	0	0.0904	0.0113	0	2.24	0	0	0.0604	0	0.495	2179	1543	118	88	2029	1465	8	7	1101961	98311	13804	0	89927	5420	0	8384	0	0	305	27.2	3.82	0	0.0958	0.0117	0	2.32
METHJ	996237	59882	10184	0	54192	4494	0	5690	0	0	322.72	19.4	3.3	0	0.0588	0.0084	0	1.84	0	0	0.0753	0	0.437	1046	797	81	60	956	737	7	7	888965	52111	9083	0	47088	4060	0	5023	0	0	323.73	19	3.31	0	0.0578	0.00835	0	1.83
METJA	505150	27348	11073	0	21550	5275	0	5798	0	0	282.68	15.3	6.2	0	0.0627	0.0241	0	3.24	0	0	0.168	0	0.421	554	455	70	56	422	368	10	10	480380	26416	10772	0	20698	5054	0	5718	0	0	284.92	15.7	6.39	0	0.064	0.0248	0	3.39
METKA	500958	68599	8268	0	62962	2631	0	5637	0	0	296.95	40.7	4.9	0	0.143	0.0173	0	3.34	0	0	0.0644	0	0.584	1286	882	52	40	1181	828	3	3	479257	66222	8128	0	60643	2549	0	5579	0	0	297.68	41.1	5.05	0	0.143	0.0176	0	3.47
METTH	524520	39938	5477	0	36974	2513	0	2964	0	0	280.64	21.4	2.93	0	0.0881	0.0117	0	1.59	0	0	0.0557	0	0.441	781	640	34	28	730	602	3	3	496438	37918	5277	0	35063	2422	0	2855	0	0	280	21.4	2.98	0	0.0885	0.0119	0	1.61
MILVL	3911	552	21	0	552	21	0	0	0	0	558.71	78.9	3	0	0.189	0.00132	0	0	0	0	0	0	0	10	5	0	0	10	5	0	0
MIMIV	341649	51080	3237	3111	45659	913	14	2324	3097	0	375.85	56.2	3.56	3.42	0.142	0.0105	0.00279	2.56	3.41	0	0.049	0.00936	0.655	581	382	21	21	548	367	2	2	319213	48432	3002	2750	43507	814	13	2188	2737	0	377.32	57.2	3.55	3.25	0.146	0.0103	0.00247	2.59
MLVMS	2941	790	90	0	728	28	0	62	0	0	980.33	263	30	0	0.317	0.0392	0	20.7	0	0	0.0617	0	0.667	9	3	2	2	11	3	0	0
MMTVC	4213	1042	21	0	1042	21	0	0	0	0	842.6	208	4.2	0	0.259	0.0061	0	0	0	0	0	0	0	10	5	0	0	10	5	0	0
MMVR	3750	248	0	0	248	0	0	0	0	0	625	41.3	0	0	0.117	0	0	0	0	0	0	0	NaN	5	4	0	0	5	4	0	0
MNPVA	2426	645	0	0	645	0	0	0	0	0	404.33	108	0	0	0.196	0	0	0	0	0	0	0	NaN	5	3	0	0	5	3	0	0
MOKV	3604	438	0	0	438	0	0	0	0	0	720.8	87.6	0	0	0.172	0	0	0	0	0	0	0	NaN	8	5	0	0	8	5	0	0
MONBE	5511963	1523224	135653	2165	1404450	19035	9	116618	2156	0	599.91	166	14.8	0.236	0.275	0.024	0.000137	12.7	0.235	0	0.0563	0.000227	0.753	15405	6668	1408	782	15467	6568	30	29	5085434	1451782	128850	2165	1337862	17086	9	111764	2156	0	609.84	174	15.5	0.26	0.288	0.025	0.000151	13.4
MONDO	11804469	3947208	355926	26162	3617247	52080	47	303846	26115	0	530.78	177	16	1.18	0.3	0.0286	0.00136	13.7	1.17	0	0.0631	0.00319	0.755	37497	16083	3717	1969	37097	15640	161	142	7627795	2850604	245113	18137	2620462	33076	32	212037	18105	0	577.56	216	18.6	1.37	0.344	0.0306	0.00157	16.1
MOOTA	751866	44378	10008	0	38557	4187	0	5821	0	0	306.76	18.1	4.08	0	0.0615	0.0139	0	2.37	0	0	0.0924	0	0.437	810	618	73	51	722	564	8	8	701521	41916	9532	0	36365	3981	0	5551	0	0	307.41	18.4	4.18	0	0.0622	0.0141	0	2.43
MOUSE	19604607	6946028	609671	38892	6379524	82043	9	527621	38876	0	452.93	160	14.1	0.899	0.32	0.0244	0.00116	12.2	0.898	0	0.0529	0.00274	0.766	63909	29335	6610	3276	64204	28747	228	208	8307074	3211895	250457	18481	2975474	32505	5	217945	18469	0	524.57	203	15.8	1.17	0.353	0.0238	0.00119	13.8
MPRVN	8005	1068	28	0	1068	28	0	0	0	0	727.73	97.1	2.55	0	0.145	0.00134	0	0	0	0	0	0	0	19	9	0	0	19	9	0	0	8005	1068	28	0	1068	28	0	0	0	0	727.73	97.1	2.55	0	0.145	0.00134	0	0
MRFVC	2446	832	0	0	832	0	0	0	0	0	1223	416	0	0	0.602	0	0	0	0	0	0	0	NaN	4	2	0	0	4	2	0	0
MSVS	972	199	0	0	199	0	0	0	0	0	243	49.8	0	0	0.17	0	0	0	0	0	0	0	NaN	5	3	0	0	5	3	0	0
MUHVS	10487	2410	21	0	2410	21	0	0	0	0	699.13	161	1.4	0	0.211	0.00151	0	0	0	0	0	0	0	22	12	0	0	22	12	0	0	10487	2410	21	0	2410	21	0	0	0	0	699.13	161	1.4	0	0.211	0.00151	0	0
MUMIP	2754	565	0	0	565	0	0	0	0	0	393.43	80.7	0	0	0.116	0	0	0	0	0	0	0	NaN	9	4	0	0	9	4	0	0
MUMPM	4977	591	28	0	591	28	0	0	0	0	622.12	73.9	3.5	0	0.172	0.00895	0	0	0	0	0	0	0	10	5	0	0	10	5	0	0
MYCMS	319461	32867	8338	0	28078	3549	0	4789	0	0	326.65	33.6	8.53	0	0.113	0.0292	0	4.9	0	0	0.126	0	0.438	514	351	54	43	452	307	5	5	262899	26175	6985	0	21923	2733	0	4252	0	0	323.77	32.2	8.6	0	0.109	0.0302	0	5.24
MYCPN	239753	34098	6243	0	29511	1656	0	4587	0	0	348.99	49.6	9.09	0	0.139	0.0237	0	6.68	0	0	0.12	0	0.6	466	286	64	40	420	253	3	3	200857	22492	5186	0	18857	1551	0	3635	0	0	355.5	39.8	9.18	0	0.104	0.02	0	6.43
MYCS2	2082061	210914	8219	96	205460	2861	0	5358	96	0	315.42	32	1.25	0.0145	0.119	0.0041	3.9e-05	0.812	0.0145	0	0.0177	0.000185	0.58	3764	2767	38	34	3706	2727	4	4	1818452	193176	7504	96	188226	2650	0	4854	96	0	311.11	33	1.28	0.0164	0.126	0.00422	4.41e-05	0.83
MYCTU	1329959	181886	5262	65	178598	2039	0	3223	65	0	333.99	45.7	1.32	0.0163	0.135	0.00449	8.41e-05	0.809	0.0163	0	0.0166	0.000254	0.531	2550	1795	21	16	2508	1771	2	2	1174312	159034	4737	65	155957	1725	0	3012	65	0	329.31	44.6	1.33	0.0182	0.135	0.00467	9.39e-05	0.845
MYOLU	10579155	3622365	314909	29972	3322316	44828	4	270081	29968	0	512.31	175	15.2	1.45	0.302	0.0244	0.00179	13.1	1.45	0	0.0539	0.00413	0.747	33673	14983	3451	1670	33656	14691	132	115	7089194	2658174	223465	16547	2447557	29394	1	194071	16546	0	571.06	214	18	1.33	0.34	0.027	0.00146	15.6
MYRV9	7268	537	0	0	537	0	0	0	0	0	660.73	48.8	0	0	0.0931	0	0	0	0	0	0	0	NaN	10	8	0	0	10	8	0	0	7268	537	0	0	537	0	0	0	0	0	660.73	48.8	0	0	0.0931	0	0	0
MYXVL	48407	2784	67	0	2784	67	0	0	0	0	306.37	17.6	0.424	0	0.0775	0.00231	0	0	0	0	0	0	0	46	38	0	0	46	38	0	0	47898	2784	67	0	2784	67	0	0	0	0	305.08	17.7	0.427	0	0.078	0.00233	0	0
NANEQ	151454	7715	3909	0	5788	1982	0	1927	0	0	282.56	14.4	7.29	0	0.0633	0.0322	0	3.6	0	0	0.188	0	0.366	147	117	29	22	115	98	5	4	151100	7715	3909	0	5788	1982	0	1927	0	0	282.43	14.4	7.31	0	0.0634	0.0322	0	3.6
NCBVS	2537	758	21	0	758	21	0	0	0	0	1268.5	379	10.5	0	0.267	0.00545	0	0	0	0	0	0	0	7	2	0	0	7	2	0	0
NDVB1	5000	725	53	0	725	53	0	0	0	0	625	90.6	6.62	0	0.304	0.00842	0	0	0	0	0	0	0	7	5	1	1	7	5	1	1
NECH7	7536017	1807243	90772	102	1734009	17640	0	73132	102	0	479.73	115	5.78	0.00649	0.223	0.0111	8.56e-06	4.66	0.00649	0	0.0292	2.34e-05	0.714	20006	10510	749	531	20076	10398	19	19	6317695	1707022	86569	102	1635807	15456	0	71113	102	0	491.65	133	6.74	0.00794	0.255	0.0129	1.05e-05	5.53
NEIG1	555344	46851	6248	0	43165	2562	0	3686	0	0	282.91	23.9	3.18	0	0.0962	0.011	0	1.88	0	0	0.0545	0	0.467	825	619	43	30	789	593	4	4	534930	43231	5873	0	39846	2488	0	3385	0	0	286.21	23.1	3.14	0	0.0917	0.0107	0	1.81
NEIMB	583208	47849	6570	0	43814	2535	0	4035	0	0	291.46	23.9	3.28	0	0.0844	0.0112	0	2.02	0	0	0.0596	0	0.49	822	581	47	33	769	551	6	6	551673	43522	6409	0	39603	2490	0	3919	0	0	291.12	23	3.38	0	0.0835	0.0116	0	2.07
NEMVE	8260405	1976589	151120	11668	1839872	25936	135	125184	11533	0	338.06	80.9	6.18	0.478	0.241	0.0159	0.0017	5.12	0.472	0	0.049	0.00449	0.725	21301	12850	1474	965	20986	12467	47	44	6292276	1642624	132856	7685	1523687	21469	135	111387	7550	0	392.9	103	8.3	0.48	0.266	0.0197	0.00136	6.96
NEUCR	4782371	1842183	103913	42	1750587	12359	0	91554	42	0	486.01	187	10.6	0.00427	0.366	0.0188	2.44e-05	9.3	0.00427	0	0.0369	6.51e-05	0.814	17077	7969	1016	633	17336	7877	16	15	4641716	1824962	103115	42	1733905	12100	0	91015	42	0	488.5	192	10.9	0.00442	0.374	0.0192	2.53e-05	9.58
NITMS	493620	57624	8763	192	51016	2347	0	6416	192	0	275	32.1	4.88	0.107	0.121	0.0186	0.000192	3.57	0.107	0	0.0791	0.000781	0.585	991	717	70	40	917	663	0	0	467872	54984	8651	192	48439	2298	0	6353	192	0	276.36	32.5	5.11	0.113	0.122	0.0193	0.000203	3.75
NODAM	1579	292	21	0	277	6	0	15	0	0	526.33	97.3	7	0	0.239	0.0511	0	5	0	0	0.102	0	0.714	3	3	0	0	3	3	0	0
NOMLE	10695254	3819206	322164	24907	3517500	45346	19	276818	24888	0	541.97	194	16.3	1.26	0.329	0.0248	0.00129	14	1.26	0	0.0511	0.00291	0.757	35514	15322	3547	1681	35611	15061	141	123	7604878	2895242	231164	16080	2678642	30627	17	200537	16063	0	555.79	212	16.9	1.18	0.353	0.0249	0.0012	14.7
NPVR1	41291	4205	795	0	3748	338	0	457	0	0	277.12	28.2	5.34	0	0.106	0.016	0	3.07	0	0	0.0593	0	0.371	67	50	6	3	59	46	0	0	41291	4205	795	0	3748	338	0	457	0	0	277.12	28.2	5.34	0	0.106	0.016	0	3.07
NVN68	2531	616	21	0	595	0	0	21	0	0	843.67	205	7	0	0.251	0.00391	0	7	0	0	0.0153	0	1	7	3	0	0	8	3	0	0
OCSVU	1280	169	0	0	169	0	0	0	0	0	426.67	56.3	0	0	0.0877	0	0	0	0	0	0	0	NaN	4	2	0	0	4	2	0	0
OLV2I	2214	395	21	0	395	21	0	0	0	0	553.5	98.8	5.25	0	0.21	0.00578	0	0	0	0	0	0	0	9	4	0	0	9	4	0	0
ORENI	15900418	5205838	527022	51718	4688736	61601	37	465421	51681	0	594.34	195	19.7	1.93	0.288	0.0279	0.00178	17.4	1.93	0	0.0623	0.00388	0.77	48682	20477	5712	2709	48937	20054	148	136	7493685	2673087	258265	18969	2425127	29249	25	229016	18944	0	603.31	215	20.8	1.53	0.318	0.0295	0.00155	18.4
ORNAN	9152217	2992217	262959	26992	2742623	40303	54	222656	26938	0	388.61	127	11.2	1.15	0.291	0.0243	0.00217	9.45	1.14	0	0.0536	0.00463	0.738	29154	15097	2919	1481	28840	14711	139	111	6249680	2300664	185302	15078	2126136	25828	24	159474	15054	0	418.94	154	12.4	1.01	0.343	0.0257	0.00197	10.7
ORYLA	11965754	3557681	353784	35462	3217056	48614	7	305170	35455	0	485.78	144	14.4	1.44	0.279	0.0252	0.00157	12.4	1.44	0	0.058	0.00363	0.743	36801	17517	3718	1898	36522	17120	141	126	6502981	2179938	196693	19301	1989043	25096	3	171597	19298	0	516.07	173	15.6	1.53	0.318	0.0261	0.00157	13.6
ORYSJ	22210771	7078251	321998	0	6825191	68938	0	253060	0	0	351.24	112	5.09	0	0.382	0.0108	0	4	0	0	0.0235	0	0.715	80950	47956	2737	1935	80673	47538	91	90	9965626	3957001	126874	0	3853630	23503	0	103371	0	0	296.08	118	3.77	0	0.464	0.00909	0	3.07
OSHVF	51428	8801	802	0	8291	292	0	510	0	0	443.34	75.9	6.91	0	0.176	0.0128	0	4.4	0	0	0.0505	0	0.51	121	67	6	5	120	66	0	0	50934	8715	781	0	8205	271	0	510	0	0	442.9	75.8	6.79	0	0.176	0.0125	0	4.43
OTOGA	10768581	3646118	314660	28312	3350107	46945	16	267715	28296	0	540.32	183	15.8	1.42	0.304	0.025	0.00141	13.4	1.42	0	0.0549	0.00331	0.751	34093	14712	3473	1708	34032	14411	178	159	7475772	2788281	230045	18398	2570944	31090	16	198955	18382	0	581.77	217	17.9	1.43	0.338	0.0268	0.00138	15.5
OUMVV	1358	213	21	0	192	0	0	21	0	0	452.67	71	7	0	0.15	0.00814	0	7	0	0	0.084	0	1	3	2	0	0	3	2	0	0
PANTR	10627310	3768757	318522	28217	3467514	45472	24	273050	28193	0	528.01	187	15.8	1.4	0.327	0.0243	0.00137	13.6	1.4	0	0.0506	0.00324	0.757	34795	15313	3476	1654	34829	15057	157	132	7551631	2888403	235279	19464	2664873	31190	23	204089	19441	0	556.13	213	17.3	1.43	0.353	0.0252	0.00135	15
PAPVE	2914	836	0	0	836	0	0	0	0	0	194.27	55.7	0	0	0.291	0	0	0	0	0	0	0	NaN	13	8	0	0	13	8	0	0	2914	836	0	0	836	0	0	0	0	0	194.27	55.7	0	0	0.291	0	0	0
PARTE	18009409	4852003	1028985	56	3987949	164987	0	863998	56	0	456.39	123	26.1	0.00142	0.295	0.0538	7.54e-07	21.9	0.00142	0	0.119	7.04e-06	0.72	51942	28393	10627	5283	50513	27108	367	349	8826571	2379360	533907	0	1926242	80789	0	453118	0	0	465.46	125	28.2	0	0.287	0.0542	0	23.9
PAVBP	1612	463	0	0	463	0	0	0	0	0	537.33	154	0	0	0.314	0	0	0	0	0	0	0	NaN	4	3	0	0	4	3	0	0
PBCV1	136702	21325	1453	59	20167	354	0	1099	59	0	172.39	26.9	1.83	0.0744	0.137	0.0084	0.00031	1.39	0.0744	0	0.0461	0.00206	0.654	293	231	12	12	286	221	2	2	129301	20091	1432	59	18954	354	0	1078	59	0	169.69	26.4	1.88	0.0774	0.137	0.00866	0.000323	1.41
PCV1C	542	62	0	0	62	0	0	0	0	0	271	31	0	0	0.118	0	0	0	0	0	0	0	NaN	2	2	0	0	2	2	0	0
PCV87	3091	483	161	0	340	18	0	143	0	0	441.57	69	23	0	0.178	0.0885	0	20.4	0	0	0.406	0	0.929	6	4	2	2	6	3	0	0
PCVC	3858	528	21	0	528	21	0	0	0	0	964.5	132	5.25	0	0.136	0.0047	0	0	0	0	0	0	0	7	4	0	0	7	4	0	0
PEDHC	5535367	1821838	155354	6010	1685551	25074	3	130280	6007	0	514.3	169	14.4	0.558	0.291	0.024	0.000409	12.1	0.558	0	0.0568	0.000694	0.739	16387	7429	1513	803	16480	7275	60	58	5226574	1780932	150488	4741	1649527	23821	3	126667	4738	0	526.5	179	15.2	0.478	0.303	0.0249	0.000303	12.8
PEMVW	2926	860	0	0	860	0	0	0	0	0	585.2	172	0	0	0.284	0	0	0	0	0	0	0	NaN	12	5	0	0	12	5	0	0
PHANO	6076935	1764528	94004	76	1684490	14042	0	79962	76	0	379.86	110	5.88	0.00475	0.284	0.0123	7.12e-06	5	0.00475	0	0.03	7.09e-05	0.762	19295	10677	841	554	19363	10553	18	18	5779932	1740655	92748	76	1661343	13512	0	79236	76	0	379.48	114	6.09	0.00499	0.294	0.0127	7.47e-06	5.2
PHATC	4838670	1202266	60676	25	1153815	12250	0	48426	25	0	462.37	115	5.8	0.00239	0.23	0.0121	5.29e-06	4.63	0.00239	0	0.0311	2.74e-05	0.709	14666	7129	499	341	14685	7039	21	21	4278968	1112770	57581	25	1066276	11112	0	46469	25	0	469.44	122	6.32	0.00274	0.242	0.0131	6.07e-06	5.1
PHYIT	7440308	1870520	170316	54	1726459	26309	0	144007	54	0	422.53	106	9.67	0.00307	0.254	0.0199	3.38e-06	8.18	0.00307	0	0.0513	1.66e-05	0.753	22490	11708	1660	997	22326	11489	46	46	5680129	1582494	151472	54	1453011	22043	0	129429	54	0	465.62	130	12.4	0.00443	0.286	0.0242	4.88e-06	10.6
PHYPA	12696586	3344967	221998	0	3180845	57876	0	164122	0	0	364.46	96	6.37	0	0.255	0.016	0	4.71	0	0	0.0394	0	0.657	43566	23605	1658	1180	42826	23185	74	73	6713683	1860345	96504	0	1785616	21775	0	74729	0	0	368.24	102	5.29	0	0.266	0.0109	0	4.1
PIG	11789359	4052965	351741	29610	3719851	48219	18	303522	29592	0	452.24	155	13.5	1.14	0.298	0.0244	0.00156	11.6	1.14	0	0.0549	0.00359	0.757	37311	17668	3823	1859	37410	17256	149	134	6886409	2626743	213064	17135	2424723	28161	18	184903	17117	0	500.54	191	15.5	1.25	0.343	0.0265	0.00157	13.4
PLABA	2837789	845455	91851	0	769714	16110	0	75741	0	0	243.46	72.5	7.88	0	0.199	0.0218	0	6.5	0	0	0.0807	0	0.759	9373	5158	698	481	9221	4918	26	24	2520605	759579	81384	0	692564	14369	0	67015	0	0	251.68	75.8	8.13	0	0.193	0.0212	0	6.69
PLACH	2835222	832722	81327	0	766603	15208	0	66119	0	0	194.01	57	5.57	0	0.2	0.02	0	4.52	0	0	0.0744	0	0.751	9539	6029	611	481	9281	5740	20	19	2416307	725485	71622	0	666609	12746	0	58876	0	0	202.25	60.7	5.99	0	0.195	0.0197	0	4.93
PLAF7	4074762	1719103	182941	131	1558549	22518	0	160423	131	0	765.21	323	34.4	0.0246	0.331	0.0417	1.71e-05	30.1	0.0246	0	0.0996	5.74e-05	0.831	14829	4263	1396	900	15486	4109	39	38	3826129	1622110	173952	131	1469121	21094	0	152858	131	0	779.25	330	35.4	0.0267	0.336	0.0427	1.85e-05	31.1
PLAKH	3704850	1410945	98234	245	1329680	17214	0	81020	245	0	726.44	277	19.3	0.048	0.318	0.0278	3.38e-05	15.9	0.048	0	0.0602	8.33e-05	0.748	14123	4107	815	491	14147	4010	30	30	3537186	1339516	94749	245	1261197	16675	0	78074	245	0	735.53	279	19.7	0.0509	0.313	0.0282	3.58e-05	16.2
PLAVS	3748164	1534807	102166	463	1448879	16701	0	85465	463	0	695.52	285	19	0.0859	0.337	0.0282	9.35e-05	15.9	0.0859	0	0.0562	0.000232	0.756	13993	4368	937	524	14111	4279	34	32	3638461	1501524	98771	380	1418569	16196	0	82575	380	0	717.65	296	19.5	0.075	0.341	0.0285	8.5e-05	16.3
PLAYO	3387422	1252925	128486	946	1142190	18697	0	109789	946	0	436.69	162	16.6	0.122	0.267	0.029	0.000222	14.2	0.122	0	0.0817	0.000624	0.793	11984	4978	998	650	12155	4789	30	29	2974340	1153376	116904	946	1051912	16386	0	100518	946	0	480.66	186	18.9	0.153	0.289	0.0324	0.000278	16.2
PLRV1	3639	1245	63	0	1182	0	0	63	0	0	404.33	138	7	0	0.406	0.0208	0	7	0	0	0.0499	0	1	13	7	0	0	13	7	0	0
PMTVS	3653	561	42	0	519	0	0	42	0	0	521.86	80.1	6	0	0.12	0.00331	0	6	0	0	0.0473	0	1	8	4	0	0	7	4	0	0
PMVK	1498	254	0	0	254	0	0	0	0	0	299.6	50.8	0	0	0.319	0	0	0	0	0	0	0	NaN	5	4	0	0	5	4	0	0
PNLV	2331	579	21	0	558	0	0	21	0	0	582.75	145	5.25	0	0.213	0.00477	0	5.25	0	0	0.0268	0	1	9	3	0	0	8	3	0	0
POL1M	2209	99	0	0	99	0	0	0	0	0	2209	99	0	0	0.0448	0	0	0	0	0	0	0	NaN	2	1	0	0	2	1	0	0
POLPA	6385196	1742553	156995	0	1604734	19176	0	137819	0	0	516.98	141	12.7	0	0.258	0.022	0	11.2	0	0	0.0598	0	0.797	16664	8262	1503	979	17066	8080	32	31	5399036	1619056	147654	0	1488181	16779	0	130875	0	0	536.04	161	14.7	0	0.282	0.0246	0	13
POLVP	1483	134	0	0	134	0	0	0	0	0	370.75	33.5	0	0	0.169	0	0	0	0	0	0	0	NaN	2	2	0	0	2	2	0	0
PONAB	11454238	4016745	345093	30273	3689803	48394	30	296699	30243	0	502.71	176	15.1	1.33	0.322	0.0244	0.00135	13	1.33	0	0.0522	0.00294	0.757	37471	16993	3779	1839	37507	16664	147	124	7618522	2903312	236372	18958	2679217	31205	30	205167	18928	0	527.82	201	16.4	1.31	0.352	0.0245	0.00135	14.2
POPTR	14155519	3224386	213542	0	3058776	47932	0	165610	0	0	338.7	77.1	5.11	0	0.229	0.014	0	3.96	0	0	0.0389	0	0.678	40528	24348	1856	1307	39956	23824	94	91	6279718	1722507	109299	0	1635452	22244	0	87055	0	0	345.5	94.8	6.01	0	0.271	0.015	0	4.79
PRIPA	8406767	2516051	212081	22952	2306696	25665	13	186416	22939	0	289.1	86.5	7.29	0.789	0.273	0.0198	0.00226	6.41	0.789	0	0.052	0.00514	0.794	26927	16700	2037	1345	27077	16235	39	39	6757714	2222725	188471	10386	2045272	21392	12	167079	10374	0	304.24	100	8.49	0.468	0.302	0.0223	0.00117	7.52
PROMA	516670	43825	5271	0	40676	2122	0	3149	0	0	274.68	23.3	2.8	0	0.0981	0.0114	0	1.67	0	0	0.0542	0	0.498	815	624	37	30	766	587	3	3	500625	41799	4928	0	38856	1985	0	2943	0	0	276.13	23.1	2.72	0	0.0966	0.0109	0	1.62
PSEAE	1857270	189701	18980	0	177208	6487	0	12493	0	0	333.86	34.1	3.41	0	0.105	0.0104	0	2.25	0	0	0.0506	0	0.548	3358	2247	111	94	3217	2159	4	4	1662340	174204	17613	0	162539	5948	0	11665	0	0	329.96	34.6	3.5	0	0.109	0.0107	0	2.32
PSHV1	39982	9667	328	0	9439	100	0	228	0	0	563.13	136	4.62	0	0.224	0.003	0	3.21	0	0	0.01	0	0.62	111	55	2	2	111	55	0	0	39982	9667	328	0	9439	100	0	228	0	0	563.13	136	4.62	0	0.224	0.003	0	3.21
PUCGT	6249486	2414480	91980	359	2336042	13897	4	78083	355	0	395.34	153	5.82	0.0227	0.368	0.0124	4.72e-05	4.94	0.0225	0	0.0254	8.73e-05	0.779	24097	12449	799	559	24249	12329	12	12	4371559	1827820	69057	184	1768600	10017	4	59040	180	0	419.82	176	6.63	0.0177	0.394	0.013	3.4e-05	5.67
PVCV1	2179	666	21	0	645	0	0	21	0	0	2179	666	21	0	0.306	0.00964	0	21	0	0	0.0315	0	1	7	1	0	0	7	1	0	0
PVMR	2781	114	0	0	114	0	0	0	0	0	463.5	19	0	0	0.0625	0	0	0	0	0	0	0	NaN	1	1	0	0	1	1	0	0
PVXX3	2104	216	21	0	195	0	0	21	0	0	420.8	43.2	4.2	0	0.0551	0.00288	0	4.2	0	0	0.0583	0	1	3	2	0	0	2	2	0	0
PVYN	4049	292	0	0	292	0	0	0	0	0	2024.5	146	0	0	0.0728	0	0	0	0	0	0	0	NaN	5	2	0	0	5	2	0	0
PYFV1	3027	181	0	0	181	0	0	0	0	0	3027	181	0	0	0.0598	0	0	0	0	0	0	0	NaN	4	1	0	0	4	1	0	0
PYRAE	654950	21499	7465	0	17851	3817	0	3648	0	0	252.88	8.3	2.88	0	0.0423	0.0134	0	1.41	0	0	0.123	0	0.333	426	384	65	52	357	326	12	12	599025	19665	6543	0	16367	3245	0	3298	0	0	254.9	8.37	2.78	0	0.0427	0.0129	0	1.4
PYRFU	577532	25486	10060	0	20387	4961	0	5099	0	0	282.41	12.5	4.92	0	0.051	0.0181	0	2.49	0	0	0.131	0	0.341	516	435	64	41	409	365	6	6	536326	23943	9587	0	19033	4677	0	4910	0	0	284.22	12.7	5.08	0	0.0516	0.0185	0	2.6
PYRKO	637680	35866	11331	0	29412	4877	0	6454	0	0	277.13	15.6	4.92	0	0.0673	0.0204	0	2.8	0	0	0.128	0	0.412	688	564	91	68	570	485	10	10	600525	34116	10713	0	28054	4651	0	6062	0	0	277.25	15.8	4.95	0	0.0681	0.0209	0	2.8
PZSVT	2166	224	0	0	224	0	0	0	0	0	541.5	56	0	0	0.168	0	0	0	0	0	0	0	NaN	4	3	0	0	4	3	0	0
RABIT	13188114	4443685	387463	35117	4076907	55778	24	331685	35093	0	540.7	182	15.9	1.44	0.304	0.0246	0.00155	13.6	1.44	0	0.0531	0.00348	0.741	40979	17824	4171	1914	40996	17501	162	142	7071488	2655781	214873	17283	2452874	29232	17	185641	17266	0	562.88	211	17.1	1.38	0.346	0.0257	0.0016	14.8
RABVP	3615	377	0	0	377	0	0	0	0	0	723	75.4	0	0	0.176	0	0	0	0	0	0	0	NaN	8	5	0	0	8	5	0	0
RAT	14445264	4829838	421005	29875	4435890	56904	28	364101	29847	0	528.11	177	15.4	1.09	0.297	0.0246	0.00131	13.3	1.09	0	0.0539	0.00314	0.767	43911	19404	4648	2276	44204	19050	172	154	7732932	2930535	233363	15636	2711688	30133	19	203230	15617	0	553.34	210	16.7	1.12	0.346	0.026	0.00118	14.5
RBDVR	2326	338	0	0	338	0	0	0	0	0	775.33	113	0	0	0.267	0	0	0	0	0	0	0	NaN	6	3	0	0	6	3	0	0
RCNMV	1423	202	0	0	202	0	0	0	0	0	474.33	67.3	0	0	0.176	0	0	0	0	0	0	0	NaN	3	3	0	0	3	3	0	0
RDVF	7840	845	70	0	825	50	0	20	0	0	603.08	65	5.38	0	0.163	0.0247	0	1.54	0	0	0.0673	0	0.317	14	9	0	0	13	8	0	0	7840	845	70	0	825	50	0	20	0	0	603.08	65	5.38	0	0.163	0.0247	0	1.54
REOVL	7734	834	77	0	785	28	0	49	0	0	703.09	75.8	7	0	0.124	0.00856	0	4.45	0	0	0.0409	0	0.75	14	7	0	0	15	7	0	0	7734	834	77	0	785	28	0	49	0	0	703.09	75.8	7	0	0.124	0.00856	0	4.45
RFVKA	46875	2376	63	0	2334	21	0	42	0	0	306.37	15.5	0.412	0	0.0716	0.00283	0	0.275	0	0	0.0165	0	0.667	44	36	0	0	44	35	0	0	45924	2376	63	0	2334	21	0	42	0	0	304.13	15.7	0.417	0	0.0726	0.00286	0	0.278
RGDV	7782	877	63	0	856	42	0	21	0	0	648.5	73.1	5.25	0	0.167	0.00514	0	1.75	0	0	0.0117	0	0.333	12	7	0	0	13	7	0	0	7782	877	63	0	856	42	0	21	0	0	648.5	73.1	5.25	0	0.167	0.00514	0	1.75
RGMVD	3086	370	0	0	370	0	0	0	0	0	3086	370	0	0	0.12	0	0	0	0	0	0	0	NaN	6	1	0	0	6	1	0	0
RHDVF	2461	183	21	0	183	21	0	0	0	0	1230.5	91.5	10.5	0	0.039	0.0897	0	0	0	0	0	0	0	4	1	0	0	4	1	0	0
RHIO9	5839211	1377606	143498	0	1258856	24748	0	118750	0	0	344.13	81.2	8.46	0	0.235	0.022	0	7	0	0	0.0662	0	0.752	16870	9995	1424	1029	16528	9644	66	65	3343663	881182	97017	0	800048	15883	0	81134	0	0	346.92	91.4	10.1	0	0.261	0.0249	0	8.42
RHOBA	2290149	389712	20248	0	375296	5832	0	14416	0	0	314.97	53.6	2.78	0	0.207	0.00664	0	1.98	0	0	0.0244	0	0.599	6588	4095	147	106	6453	4030	10	10	2168650	372162	19418	0	358318	5574	0	13844	0	0	315.58	54.2	2.83	0	0.207	0.00669	0	2.01
RHORT	1292602	142321	8679	0	136574	2932	0	5747	0	0	337.05	37.1	2.26	0	0.116	0.0067	0	1.5	0	0	0.0271	0	0.584	2472	1675	59	52	2410	1651	5	5	1212185	134953	8294	0	129520	2861	0	5433	0	0	337.47	37.6	2.31	0	0.117	0.00691	0	1.51
RHOS4	1334414	173182	10691	0	165920	3429	0	7262	0	0	314.72	40.8	2.52	0	0.137	0.00841	0	1.71	0	0	0.0326	0	0.574	2907	1957	69	55	2830	1909	2	2	1240356	162486	9718	0	155796	3028	0	6690	0	0	315.85	41.4	2.47	0	0.138	0.00825	0	1.7
RICPR	279199	14166	3151	0	12770	1755	0	1396	0	0	334.77	17	3.78	0	0.0578	0.0141	0	1.67	0	0	0.0828	0	0.347	255	181	18	17	242	170	5	5	277100	14166	3151	0	12770	1755	0	1396	0	0	335.07	17.1	3.81	0	0.0583	0.0142	0	1.69
ROTHC	5608	333	91	0	304	62	0	29	0	0	509.82	30.3	8.27	0	0.115	0.032	0	2.64	0	0	0.0745	0	0.345	5	5	0	0	5	5	0	0	5608	333	91	0	304	62	0	29	0	0	509.82	30.3	8.27	0	0.115	0.032	0	2.64
ROTJ1	5679	559	138	0	466	45	0	93	0	0	516.27	50.8	12.5	0	0.145	0.0439	0	8.45	0	0	0.156	0	0.582	10	6	2	2	8	6	0	0	5679	559	138	0	466	45	0	93	0	0	516.27	50.8	12.5	0	0.145	0.0439	0	8.45
ROTSH	5897	645	119	0	602	76	0	43	0	0	491.42	53.8	9.92	0	0.164	0.0294	0	3.58	0	0	0.0603	0	0.446	8	7	0	0	8	7	0	0	5897	645	119	0	602	76	0	43	0	0	491.42	53.8	9.92	0	0.164	0.0294	0	3.58
RRSVT	8422	829	21	0	829	21	0	0	0	0	765.64	75.4	1.91	0	0.127	0.00154	0	0	0	0	0	0	0	14	7	0	0	14	7	0	0	8422	829	21	0	829	21	0	0	0	0	765.64	75.4	1.91	0	0.127	0.00154	0	0
RSVSA	3033	692	0	0	692	0	0	0	0	0	758.25	173	0	0	0.28	0	0	0	0	0	0	0	NaN	10	4	0	0	10	4	0	0
RSVT	4949	366	42	0	345	21	0	21	0	0	707	52.3	6	0	0.111	0.00206	0	3	0	0	0.0298	0	0.5	8	4	0	0	7	4	0	0
RTBVP	2373	569	114	0	477	22	0	92	0	0	593.25	142	28.5	0	0.333	0.048	0	23	0	0	0.112	0	0.8	8	3	1	1	8	3	0	0
RTSVA	3473	512	49	0	483	20	0	29	0	0	3473	512	49	0	0.147	0.0141	0	29	0	0	0.0566	0	0.592	9	1	0	0	9	1	0	0
RUBVT	3179	734	21	0	713	0	0	21	0	0	1589.5	367	10.5	0	0.244	0.00988	0	10.5	0	0	0.0348	0	1	10	2	0	0	10	2	0	0
RVFVZ	3856	341	0	0	341	0	0	0	0	0	964	85.2	0	0	0.0983	0	0	0	0	0	0	0	NaN	8	3	0	0	8	3	0	0
SALRD	1007991	216576	15571	0	203880	2875	0	12696	0	0	358.46	77	5.54	0	0.218	0.0144	0	4.51	0	0	0.0407	0	0.732	3484	1931	125	92	3388	1886	2	2	960255	206413	14430	0	194768	2785	0	11645	0	0	360.46	77.5	5.42	0	0.218	0.0144	0	4.37
SALTY	1420651	82957	12260	0	75632	4935	0	7325	0	0	313.4	18.3	2.7	0	0.0627	0.00928	0	1.62	0	0	0.0676	0	0.475	1466	1081	59	51	1375	1010	6	6	1295415	74812	11325	0	68233	4746	0	6579	0	0	311.4	18	2.72	0	0.0623	0.00945	0	1.58
SARHA	11957955	4047241	383706	34185	3684293	54915	28	328791	34157	0	534.12	181	17.1	1.53	0.303	0.0276	0.00171	14.7	1.53	0	0.061	0.00382	0.757	36916	16057	4190	2041	37035	15705	195	166	7118626	2602680	231762	16044	2386226	31337	15	200425	16029	0	541.92	198	17.6	1.22	0.339	0.0288	0.00143	15.3
SBMVA	1951	298	0	0	298	0	0	0	0	0	487.75	74.5	0	0	0.155	0	0	0	0	0	0	0	NaN	3	3	0	0	3	3	0	0
SBWMN	3259	486	91	0	481	86	0	5	0	0	651.8	97.2	18.2	0	0.168	0.0391	0	1	0	0	0.00631	0	0.0397	9	4	0	0	8	4	0	0
SCHMA	5593996	1810780	115321	8032	1710515	23083	5	92238	8027	0	477.67	155	9.85	0.686	0.268	0.0171	0.000494	7.88	0.685	0	0.0411	0.000959	0.685	19253	7551	1092	549	19022	7425	52	51	4849192	1599895	95722	6892	1517787	20505	1	75217	6891	0	507.24	167	10	0.721	0.275	0.0165	0.000481	7.87
SCHPO	2363896	557978	44669	0	522354	9045	0	35624	0	0	464.42	110	8.78	0	0.23	0.0193	0	7	0	0	0.0533	0	0.717	5964	3332	379	243	5885	3228	14	13	2202942	536414	43259	0	501791	8636	0	34623	0	0	467.42	114	9.18	0	0.236	0.02	0	7.35
SCLS1	5227922	1682466	88922	373	1605981	12804	6	76118	367	0	363.05	117	6.18	0.0259	0.281	0.0136	0.00025	5.29	0.0255	0	0.0332	0.000646	0.781	17175	9127	836	571	17350	9004	21	20	4839844	1626588	85652	251	1552667	11982	0	73670	251	0	362.26	122	6.41	0.0188	0.291	0.0137	0.000212	5.51
SCSVF	1595	237	0	0	237	0	0	0	0	0	199.38	29.6	0	0	0.15	0	0	0	0	0	0	0	NaN	5	5	0	0	5	5	0	0
SCV20	829	192	0	0	192	0	0	0	0	0	829	192	0	0	0.232	0	0	0	0	0	0	0	NaN	2	1	0	0	2	1	0	0
SCVLA	2185	0	0	0	0	0	0	0	0	0	1092.5	0	0	0	0	0	0	0	0	0	NaN	NaN	NaN	0	0	0	0	0	0	0	0
SDVS5	3655	481	42	0	481	42	0	0	0	0	1827.5	240	21	0	0.143	0.0117	0	0	0	0	0	0	0	9	2	0	0	9	2	0	0
SENDO	5710	1315	21	0	1315	21	0	0	0	0	634.44	146	2.33	0	0.355	0.00406	0	0	0	0	0	0	0	9	7	0	0	9	7	0	0
SFAVA	37551	4835	700	0	4293	158	0	542	0	0	305.29	39.3	5.69	0	0.135	0.0196	0	4.41	0	0	0.0679	0	0.618	67	52	10	4	64	51	0	0	36827	4673	616	0	4213	156	0	460	0	0	304.36	38.6	5.09	0	0.13	0.0156	0	3.8
SFV	3685	446	21	0	425	0	0	21	0	0	1842.5	223	10.5	0	0.134	0.00432	0	10.5	0	0	0.0467	0	1	7	2	0	0	6	2	0	0
SFVCP	3577	746	28	0	746	28	0	0	0	0	715.4	149	5.6	0	0.276	0.00567	0	0	0	0	0	0	0	10	5	0	0	10	5	0	0
SHEON	1342432	83655	13501	22	76035	5903	0	7598	22	0	330	20.6	3.32	0.00541	0.0657	0.0107	7.13e-06	1.87	0.00541	0	0.0733	0.000161	0.475	1477	1077	90	73	1373	997	15	14	1275332	79690	13291	22	72140	5763	0	7528	22	0	328.95	20.6	3.43	0.00567	0.0656	0.0111	7.48e-06	1.94
SHIDS	1094416	65045	10422	0	59263	4640	0	5782	0	0	280.84	16.7	2.67	0	0.0628	0.0112	0	1.48	0	0	0.0702	0	0.442	1180	909	61	49	1093	842	3	3	970790	58211	9356	0	52770	3915	0	5441	0	0	296.24	17.8	2.86	0	0.0658	0.0107	0	1.66
SHV21	33202	3963	485	0	3655	177	0	308	0	0	442.69	52.8	6.47	0	0.146	0.0162	0	4.11	0	0	0.0465	0	0.509	49	34	4	4	50	34	1	1	33202	3963	485	0	3655	177	0	308	0	0	442.69	52.8	6.47	0	0.146	0.0162	0	4.11
SHVX	2832	642	21	0	621	0	0	21	0	0	472	107	3.5	0	0.284	0.00921	0	3.5	0	0	0.0258	0	1	9	5	0	0	9	5	0	0
SIFVH	12208	724	172	0	642	90	0	82	0	0	167.23	9.92	2.36	0	0.0897	0.0184	0	1.12	0	0	0.0982	0	0.404	18	15	2	2	15	13	0	0	12109	724	172	0	642	90	0	82	0	0	168.18	10.1	2.39	0	0.0909	0.0187	0	1.14
SINDV	6270	1074	56	0	1018	0	0	56	0	0	2090	358	18.7	0	0.159	0.00743	0	18.7	0	0	0.0393	0	1	11	3	0	0	11	3	0	0
SIRV1	8526	149	119	0	118	88	0	31	0	0	198.28	3.47	2.77	0	0.04	0.0168	0	0.721	0	0	0.295	0	0.177	3	3	1	1	2	2	0	0	8285	149	119	0	118	88	0	31	0	0	197.26	3.55	2.83	0	0.041	0.0172	0	0.738
SJNNV	1398	174	21	0	174	21	0	0	0	0	466	58	7	0	0.0917	0.0933	0	0	0	0	0	0	0	2	2	0	0	2	2	0	0
SOCMV	2639	884	85	0	799	0	0	85	0	0	293.22	98.2	9.44	0	0.441	0.0295	0	9.44	0	0	0.0671	0	1	13	8	1	1	12	8	0	0
SOLLC	12001708	2823653	184778	28	2680456	41609	0	143169	28	0	344.52	81.1	5.3	0.000804	0.228	0.014	2.94e-06	4.11	0.000804	0	0.0374	5.09e-06	0.677	34066	20146	1631	1122	33706	19765	63	62	6495513	1816848	118577	28	1720442	22199	0	96378	28	0	354.69	99.2	6.48	0.00153	0.265	0.0155	5.6e-06	5.26
SOLTU	15884567	4029970	246531	0	3841859	58420	0	188111	0	0	299.08	75.9	4.64	0	0.263	0.0151	0	3.54	0	0	0.0383	0	0.686	49509	32094	1874	1401	48729	31354	80	80	6111611	1853999	109538	0	1765516	21055	0	88483	0	0	314.45	95.4	5.64	0	0.302	0.0155	0	4.55
SORBI	12615212	3520082	174879	95	3379489	34381	0	140498	95	0	384.66	107	5.33	0.0029	0.293	0.0139	8.32e-06	4.28	0.0029	0	0.0305	1.32e-05	0.717	41480	23509	1615	1152	41171	23191	48	48	6777753	2302557	114086	95	2208204	19828	0	94258	95	0	402.41	137	6.77	0.00564	0.367	0.0161	1.62e-05	5.6
SOYBN	25995254	6518029	436247	0	6174366	92584	0	343663	0	0	402.01	101	6.75	0	0.242	0.0151	0	5.31	0	0	0.0383	0	0.688	76420	41455	4032	2627	75800	40802	153	152	6655787	1865478	120281	0	1768694	23497	0	96784	0	0	379.38	106	6.86	0	0.264	0.0145	0	5.52
SPETR	10264285	3491526	306290	31470	3197091	43320	5	262970	31465	0	514.09	175	15.3	1.58	0.299	0.0262	0.00157	13.2	1.58	0	0.0574	0.00364	0.76	31837	14250	3363	1685	31939	13944	129	111	7073847	2665689	222679	18240	2454410	29637	3	193042	18237	0	547.72	206	17.2	1.41	0.338	0.0286	0.00135	14.9
SPMMV	3456	232	21	0	211	0	0	21	0	0	3456	232	21	0	0.0671	0.00608	0	21	0	0	0.0905	0	1	3	1	0	0	3	1	0	0
SPTNK	4848	1197	273	154	783	13	0	260	154	0	230.86	57	13	7.33	0.342	0.0873	0.0253	12.4	7.33	0	0.179	0.06	0.976	15	15	5	4	13	12	0	0	4848	1197	273	154	783	13	0	260	154	0	230.86	57	13	7.33	0.342	0.0873	0.0253	12.4
SPV1C	2197	100	0	0	100	0	0	0	0	0	169	7.69	0	0	0.0552	0	0	0	0	0	0	0	NaN	2	2	0	0	2	2	0	0	2197	100	0	0	100	0	0	0	0	0	169	7.69	0	0	0.0552	0	0	0
SPV1R	2176	109	0	0	109	0	0	0	0	0	181.33	9.08	0	0	0.0657	0	0	0	0	0	0	0	NaN	2	2	0	0	2	2	0	0	2176	109	0	0	109	0	0	0	0	0	181.33	9.08	0	0	0.0657	0	0	0
SPV4	1423	169	21	0	148	0	0	21	0	0	158.11	18.8	2.33	0	0.217	0.0157	0	2.33	0	0	0.171	0	1	3	3	0	0	2	2	0	0
SSDRV	1700	84	0	0	84	0	0	0	0	0	1700	84	0	0	0.0494	0	0	0	0	0	0	0	NaN	2	1	0	0	2	1	0	0
SSV1	4952	382	215	0	229	62	0	153	0	0	145.65	11.2	6.32	0	0.102	0.0433	0	4.5	0	0	0.362	0	0.603	8	8	4	4	4	4	1	1	4860	382	215	0	229	62	0	153	0	0	147.27	11.6	6.52	0	0.105	0.0446	0	4.64
STAA8	797321	81899	13987	31	72700	4819	0	9168	31	0	275.99	28.3	4.84	0.0107	0.0881	0.0154	2.75e-05	3.17	0.0107	0	0.0883	0.000247	0.492	1099	764	105	71	1049	701	14	13	746117	76829	13374	31	67984	4560	0	8814	31	0	279.65	28.8	5.01	0.0116	0.0859	0.0153	2.98e-05	3.3
STRCO	2629320	529178	14924	161	517177	3084	0	11840	161	0	327.11	65.8	1.86	0.02	0.206	0.0051	0.000107	1.47	0.02	0	0.0139	0.000314	0.679	8539	5145	115	77	8494	5103	5	5	2255756	474423	13697	161	463236	2671	0	11026	161	0	325.88	68.5	1.98	0.0233	0.217	0.00543	0.000124	1.59
STRPU	13953726	4236724	319948	8613	3950281	42087	31	277861	8582	0	489.42	149	11.2	0.302	0.259	0.0214	0.000597	9.75	0.301	0	0.0515	0.00128	0.762	39515	19117	3312	1836	40002	18704	77	76	8927365	3190743	230952	6804	2978979	25966	26	204986	6778	0	548.3	196	14.2	0.418	0.306	0.0234	0.000739	12.6
STRR6	586642	39673	8615	639	34285	3866	0	4749	639	0	289.13	19.6	4.25	0.315	0.0648	0.0138	0.000123	2.34	0.315	0	0.0981	0.000625	0.396	664	481	64	46	596	433	5	4	556056	37129	8105	639	32090	3705	0	4400	639	0	297.67	19.9	4.34	0.342	0.0648	0.0142	0.000134	2.36
SULSO	827798	24732	10644	0	20202	6114	0	4530	0	0	281.76	8.42	3.62	0	0.0382	0.015	0	1.54	0	0	0.133	0	0.283	528	475	63	48	431	391	7	7	698181	20170	7989	0	16401	4220	0	3769	0	0	290.91	8.4	3.33	0	0.0365	0.0128	0	1.57
SV40	1681	341	0	0	341	0	0	0	0	0	280.17	56.8	0	0	0.139	0	0	0	0	0	0	0	NaN	8	4	0	0	8	4	0	0
SVSAP	2606	304	21	0	283	0	0	21	0	0	868.67	101	7	0	0.277	0.0424	0	7	0	0	0.0787	0	1	7	3	0	0	6	3	0	0
SWPV1	46268	2342	180	0	2282	120	0	60	0	0	316.9	16	1.23	0	0.0688	0.00588	0	0.411	0	0	0.0364	0	0.378	43	31	1	1	42	30	1	1	45999	2342	180	0	2282	120	0	60	0	0	317.23	16.2	1.24	0	0.0692	0.00592	0	0.414
SYNY3	1122758	78630	14222	0	70111	5703	0	8519	0	0	320.15	22.4	4.06	0	0.0726	0.0119	0	2.43	0	0	0.079	0	0.464	1341	1007	117	91	1233	942	21	21	1040982	73370	13057	0	65470	5157	0	7900	0	0	327.25	23.1	4.1	0	0.0735	0.0118	0	2.48
TACVF	3370	250	28	0	223	1	0	27	0	0	842.5	62.5	7	0	0.161	0.0123	0	6.75	0	0	0.0533	0	0.964	6	3	0	0	5	3	0	0
TAEGU	8160757	2490245	267751	23042	2236463	36996	15	230755	23027	0	449.85	137	14.8	1.27	0.287	0.0294	0.00207	12.7	1.27	0	0.0681	0.00445	0.746	24574	11917	2863	1444	24160	11521	94	87	5507084	1798010	192353	15458	1616260	26050	11	166303	15447	0	505.52	165	17.7	1.42	0.31	0.0332	0.00157	15.3
TAKRU	30302607	9342330	916226	241172	8313879	128614	333	787612	240839	0	633.2	195	19.1	5.04	0.281	0.0271	0.00433	16.5	5.03	0	0.0602	0.00782	0.746	90242	36540	9971	4820	90362	35832	402	333	7013070	2368752	222025	25849	2148347	27412	57	194613	25792	0	593.37	200	18.8	2.19	0.303	0.0269	0.00202	16.5
TASV1	3381	630	133	0	505	8	0	125	0	0	1127	210	44.3	0	0.198	0.039	0	41.7	0	0	0.185	0	0.873	11	3	0	0	9	3	0	0
TBSVC	1567	108	0	0	108	0	0	0	0	0	391.75	27	0	0	0.0973	0	0	0	0	0	0	0	NaN	2	2	0	0	2	2	0	0
TETNG	12622263	3863394	361086	71373	3478264	47225	104	313861	71269	0	545.66	167	15.6	3.09	0.279	0.0246	0.00305	13.6	3.08	0	0.055	0.00607	0.751	38364	16899	3862	1843	38221	16519	124	111	6307152	2098025	179119	20081	1921912	23054	33	156065	20048	0	534.96	178	15.2	1.7	0.303	0.0241	0.00194	13.2
TETTS	16031229	5930982	794339	280	5242615	106249	3	688090	277	0	649.09	240	32.2	0.0113	0.322	0.0426	1.3e-05	27.9	0.0112	0	0.0998	5.63e-05	0.785	47730	18362	7114	3641	50329	17764	185	176	13031748	5313573	732230	186	4672803	91643	3	640587	183	0	671.57	274	37.7	0.00959	0.353	0.0485	1.19e-05	33
THAPS	5824029	1940404	99932	0	1854249	13777	0	86155	0	0	497.02	166	8.53	0	0.295	0.0155	0	7.35	0	0	0.0352	0	0.789	21017	8605	888	578	21204	8517	17	17	5236995	1833566	92992	0	1752964	12390	0	80602	0	0	513.58	180	9.12	0	0.314	0.0163	0	7.9
THEAC	453225	18091	3780	0	15785	1474	0	2306	0	0	305.82	12.2	2.55	0	0.0487	0.00928	0	1.56	0	0	0.064	0	0.401	393	332	35	23	356	310	2	2	441445	17860	3759	0	15554	1453	0	2306	0	0	304.44	12.3	2.59	0	0.049	0.00945	0	1.59
THEAN	2024948	472529	34276	48	445946	7741	0	26535	48	0	534.29	125	9.04	0.0127	0.226	0.0171	2.04e-05	7	0.0127	0	0.0463	0.00022	0.683	5966	2690	272	191	5834	2643	14	14	1839163	440104	33360	48	414119	7423	0	25937	48	0	523.23	125	9.49	0.0137	0.231	0.018	2.2e-05	7.38
THEAS	566890	55019	6620	0	50510	2111	0	4509	0	0	326.36	31.7	3.81	0	0.1	0.0115	0	2.6	0	0	0.0568	0	0.577	993	681	47	37	943	651	1	1	548475	53473	6441	0	49094	2062	0	4379	0	0	326.28	31.8	3.83	0	0.101	0.0117	0	2.6
THEEB	769931	55761	11281	19	48369	3908	0	7373	19	0	314.13	22.8	4.6	0.00775	0.077	0.0135	8.52e-05	3.01	0.00775	0	0.0869	0.000334	0.492	971	739	96	64	875	683	8	8	709203	49466	10054	19	42761	3368	0	6686	19	0	312.84	21.8	4.43	0.00838	0.0752	0.0134	9.21e-05	2.95
THEMA	582801	33969	12058	0	26964	5053	0	7005	0	0	314.69	18.3	6.51	0	0.0695	0.0198	0	3.78	0	0	0.136	0	0.428	644	510	90	63	526	440	12	12	550111	31963	11407	0	25269	4713	0	6694	0	0	314.17	18.3	6.51	0	0.0709	0.0202	0	3.82
THEPA	1895349	436000	28459	29	414696	7184	0	21275	29	0	465.57	107	6.99	0.00712	0.222	0.0159	2.65e-05	5.23	0.00712	0	0.0423	0.000139	0.647	5404	2745	219	158	5329	2688	16	16	1767273	411954	27720	29	391082	6877	0	20843	29	0	463.24	108	7.27	0.0076	0.225	0.0167	2.83e-05	5.46
THEPD	544134	33613	7909	0	28348	2644	0	5265	0	0	290.05	17.9	4.22	0	0.0761	0.0192	0	2.81	0	0	0.119	0	0.53	671	540	61	46	556	456	2	2	514965	31294	7182	0	26578	2466	0	4716	0	0	291.43	17.7	4.06	0	0.0724	0.017	0	2.67
THET8	663962	89212	10724	0	81528	3040	0	7684	0	0	298.14	40.1	4.82	0	0.139	0.0155	0	3.45	0	0	0.0548	0	0.563	1533	1041	87	58	1458	1003	5	5	623852	85505	10503	0	77881	2879	0	7624	0	0	301.23	41.3	5.07	0	0.139	0.0161	0	3.68
THEYD	608875	35638	11766	0	29321	5449	0	6317	0	0	307.2	18	5.94	0	0.0707	0.0211	0	3.19	0	0	0.134	0	0.406	662	519	86	64	546	439	10	10	583511	34337	11402	0	28189	5254	0	6148	0	0	308.9	18.2	6.04	0	0.0724	0.0214	0	3.25
THOGV	3637	286	0	0	286	0	0	0	0	0	519.57	40.9	0	0	0.0733	0	0	0	0	0	0	0	NaN	7	4	0	0	7	4	0	0
TMV	2043	145	0	0	145	0	0	0	0	0	681	48.3	0	0	0.117	0	0	0	0	0	0	0	NaN	2	2	0	0	2	2	0	0
TNVA	1187	194	0	0	194	0	0	0	0	0	237.4	38.8	0	0	0.238	0	0	0	0	0	0	0	NaN	4	3	0	0	4	3	0	0
TOBSV	2625	447	0	0	447	0	0	0	0	0	525	89.4	0	0	0.226	0	0	0	0	0	0	0	NaN	8	5	0	0	8	5	0	0
TORVR	4474	1105	0	0	1105	0	0	0	0	0	1118.5	276	0	0	0.399	0	0	0	0	0	0	0	NaN	12	4	0	0	12	4	0	0
TOTV	3543	311	56	0	276	21	0	35	0	0	1181	104	18.7	0	0.21	0.0656	0	11.7	0	0	0.133	0	0.5	4	3	1	1	4	3	0	0
TOXGO	5481678	3106715	138715	339	2980033	12372	0	126343	339	0	699.1	396	17.7	0.0432	0.472	0.0245	3.03e-05	16.1	0.0432	0	0.0408	3.66e-05	0.857	23328	6853	1345	743	24124	6781	17	16	5378854	3072156	136277	339	2947582	12042	0	124235	339	0	709.99	406	18	0.0447	0.477	0.0248	3.14e-05	16.4
TPCTV	1065	241	21	0	241	21	0	0	0	0	177.5	40.2	3.5	0	0.286	0.0365	0	0	0	0	0	0	0	5	4	0	0	5	4	0	0
TRIAD	5222991	971405	99044	815	895140	23594	0	75450	815	0	453.38	84.3	8.6	0.0707	0.175	0.0179	6.98e-05	6.55	0.0707	0	0.0617	0.000249	0.658	11362	6083	911	601	11069	5881	49	47	4402293	912910	92095	764	841091	21040	0	71055	764	0	470.33	97.5	9.84	0.0816	0.198	0.0205	6.72e-05	7.59
TRIVA	17055435	3454672	628927	694	2920349	95247	51	533680	643	0	339.81	68.8	12.5	0.0138	0.22	0.032	1.38e-05	10.6	0.0128	0	0.0904	0.000122	0.69	41684	28280	6089	2876	40435	26654	157	155	9113720	2031306	471978	38	1610112	50822	0	421156	38	0	491.7	110	25.5	0.00205	0.232	0.0431	2e-06	22.7
TRVPP	2950	222	21	0	201	0	0	21	0	0	491.67	37	3.5	0	0.15	0.00205	0	3.5	0	0	0.075	0	1	4	4	0	0	4	4	0	0
TRYB2	4345560	1156164	126307	0	1048612	18755	0	107552	0	0	506.06	135	14.7	0	0.25	0.023	0	12.5	0	0	0.0567	0	0.734	13715	6030	1230	594	13448	5919	45	40	3962929	1090877	116710	0	991490	17323	0	99387	0	0	508	140	15	0	0.258	0.0234	0	12.7
TSWV1	5033	553	25	0	528	0	0	25	0	0	1006.6	111	5	0	0.149	0.0166	0	5	0	0	0.0459	0	1	12	5	0	0	11	5	0	0
TTV1K	4377	208	21	0	208	21	0	0	0	0	118.3	5.62	0.568	0	0.0449	0.00389	0	0	0	0	0	0	0	4	4	0	0	4	4	0	0	4377	208	21	0	208	21	0	0	0	0	118.3	5.62	0.568	0	0.0449	0.00389	0	0
TTVA1	972	300	0	0	300	0	0	0	0	0	486	150	0	0	0.408	0	0	0	0	0	0	0	NaN	4	2	0	0	4	2	0	0
TTVB1	883	353	0	0	353	0	0	0	0	0	294.33	118	0	0	0.566	0	0	0	0	0	0	0	NaN	4	3	0	0	4	3	0	0
TTVD1	775	415	0	0	415	0	0	0	0	0	258.33	138	0	0	0.598	0	0	0	0	0	0	0	NaN	5	3	0	0	5	3	0	0
TTVE1	1041	449	21	0	428	0	0	21	0	0	260.25	112	5.25	0	0.479	0.00737	0	5.25	0	0	0.0303	0	1	5	3	0	0	5	3	0	0
TTVF1	772	375	0	0	375	0	0	0	0	0	257.33	125	0	0	0.505	0	0	0	0	0	0	0	NaN	4	3	0	0	4	3	0	0
TTVG1	932	348	42	0	306	0	0	42	0	0	466	174	21	0	0.478	0.0561	0	21	0	0	0.121	0	1	4	2	0	0	4	2	0	0
TTVI1	932	315	0	0	315	0	0	0	0	0	310.67	105	0	0	0.335	0	0	0	0	0	0	0	NaN	3	2	0	0	3	2	0	0
TTVT1	920	486	0	0	486	0	0	0	0	0	306.67	162	0	0	0.721	0	0	0	0	0	0	0	NaN	6	3	0	0	6	3	0	0
TTVZ1	1001	500	0	0	500	0	0	0	0	0	333.67	167	0	0	0.671	0	0	0	0	0	0	0	NaN	4	3	0	0	4	3	0	0
TUBMM	3279832	1083047	59169	0	1033056	9178	0	49991	0	0	437.66	145	7.9	0	0.305	0.0149	0	6.67	0	0	0.0335	0	0.765	10571	5377	547	339	10690	5316	11	11	3146744	1066374	58063	0	1017120	8809	0	49254	0	0	442.46	150	8.16	0	0.315	0.0152	0	6.93
TYMV	2661	1215	0	0	1215	0	0	0	0	0	887	405	0	0	0.489	0	0	0	0	0	0	0	NaN	7	3	0	0	7	3	0	0
USTMA	4000743	1625463	64540	190	1569427	8650	44	55890	146	0	610.99	248	9.86	0.029	0.365	0.0143	6.89e-05	8.54	0.0223	0	0.0264	5.82e-05	0.795	14609	5583	588	367	14911	5550	15	15	3870101	1600179	63792	190	1544393	8152	44	55640	146	0	617.93	255	10.2	0.0303	0.373	0.0147	7.2e-05	8.88
UUKS	3638	342	21	0	324	3	0	18	0	0	909.5	85.5	5.25	0	0.0631	0.00521	0	4.5	0	0	0.0517	0	0.857	7	2	0	0	6	2	0	0
VACCW	56795	4124	672	0	3565	113	0	559	0	0	261.73	19	3.1	0	0.0966	0.012	0	2.58	0	0	0.0658	0	0.586	61	52	6	2	59	49	0	0	56134	4124	672	0	3565	113	0	559	0	0	261.09	19.2	3.13	0	0.0975	0.0121	0	2.6
VAR67	54427	4171	541	0	3747	117	0	424	0	0	273.5	21	2.72	0	0.0829	0.0124	0	2.13	0	0	0.0526	0	0.592	64	47	2	1	64	46	0	0	53767	4171	541	0	3747	117	0	424	0	0	272.93	21.2	2.75	0	0.0838	0.0126	0	2.15
VESVA	2692	342	0	0	342	0	0	0	0	0	897.33	114	0	0	0.0857	0	0	0	0	0	0	0	NaN	6	2	0	0	6	2	0	0
VIBCH	1153846	71021	14218	0	62809	6006	0	8212	0	0	304.93	18.8	3.76	0	0.0692	0.0114	0	2.17	0	0	0.0927	0	0.472	1260	940	80	67	1119	845	4	4	1103558	67713	13653	0	59832	5772	0	7881	0	0	306.88	18.8	3.8	0	0.0694	0.0115	0	2.19
VIBF1	1236819	81870	14692	0	73926	6748	0	7944	0	0	324.37	21.5	3.85	0	0.0697	0.0116	0	2.08	0	0	0.0792	0	0.453	1456	1078	87	76	1331	993	17	17	1165785	75810	13826	0	68287	6303	0	7523	0	0	323.29	21	3.83	0	0.0685	0.0117	0	2.09
VITVI	10756843	2360244	152267	81	2244723	36827	0	115440	81	0	360.53	79.1	5.1	0.00271	0.214	0.0123	5.03e-06	3.87	0.00271	0	0.0357	1.56e-05	0.661	29480	17180	1287	865	29169	16853	67	65	5869070	1612164	101525	53	1530371	19785	0	81740	53	0	366.27	101	6.34	0.00331	0.259	0.014	5.93e-06	5.1
VSIVA	3603	358	0	0	358	0	0	0	0	0	600.5	59.7	0	0	0.209	0	0	0	0	0	0	0	NaN	9	4	0	0	9	4	0	0
VZVD	35782	5064	122	0	4996	54	0	68	0	0	518.58	73.4	1.77	0	0.157	0.00345	0	0.986	0	0	0.0161	0	0.514	68	44	1	1	67	43	0	0	35782	5064	122	0	4996	54	0	68	0	0	518.58	73.4	1.77	0	0.157	0.00345	0	0.986
WBV24	13035	1598	63	0	1556	21	0	42	0	0	2607	320	12.6	0	0.145	0.00498	0	8.4	0	0	0.0183	0	0.667	19	3	0	0	19	3	0	0
WCCVB	1103	112	0	0	112	0	0	0	0	0	551.5	56	0	0	0.107	0	0	0	0	0	0	0	NaN	2	2	0	0	2	2	0	0
WDSV	4217	906	85	0	821	0	0	85	0	0	702.83	151	14.2	0	0.2	0.0321	0	14.2	0	0	0.166	0	1	12	5	1	1	13	4	0	0
WSSVS	124910	33951	2702	541	31051	343	0	2359	541	0	234.79	63.8	5.08	1.02	0.215	0.0126	0.000604	4.43	1.02	0	0.0437	0.00169	0.791	453	238	22	18	448	231	0	0	122664	33510	2632	541	30662	325	0	2307	541	0	236.8	64.7	5.08	1.04	0.217	0.0124	0.00062	4.45
XANCP	1418660	168418	10133	0	161433	3148	0	6985	0	0	343.75	40.8	2.46	0	0.124	0.00744	0	1.69	0	0	0.0288	0	0.597	2834	1857	68	57	2762	1827	5	5	1324654	158614	9064	0	152293	2743	0	6321	0	0	342.82	41	2.35	0	0.125	0.00683	0	1.64
XENTR	12595279	3676286	366344	31585	3331359	52932	70	313412	31515	0	536.24	157	15.6	1.34	0.26	0.0246	0.00149	13.3	1.34	0	0.0621	0.00428	0.748	36551	16351	3996	1932	36042	15955	150	137	6786855	2181089	206569	13639	1990142	29248	13	177321	13626	0	583.26	187	17.8	1.17	0.289	0.0263	0.00122	15.2
XMRV6	2914	717	60	0	657	0	0	60	0	0	971.33	239	20	0	0.297	0.0244	0	20	0	0	0.0638	0	1	8	3	2	2	10	3	0	0
YARLI	3092655	905148	65303	85	849577	9817	0	55486	85	0	482.1	141	10.2	0.0133	0.278	0.0209	1.94e-05	8.65	0.0133	0	0.0505	5.5e-05	0.763	8670	4634	615	415	8761	4543	14	14	2794003	874646	63541	85	820307	9287	0	54254	85	0	482.81	151	11	0.0147	0.297	0.0226	2.15e-05	9.38
YEAST	3012350	824398	58463	0	776323	10388	0	48075	0	0	454.42	124	8.82	0	0.246	0.0176	0	7.25	0	0	0.0486	0	0.738	8499	4342	510	350	8404	4245	16	16	2569360	725034	55297	0	679121	9384	0	45913	0	0	448.8	127	9.66	0	0.255	0.0191	0	8.02
YEFV1	3411	185	0	0	185	0	0	0	0	0	3411	185	0	0	0.0542	0	0	0	0	0	0	0	NaN	5	1	0	0	5	1	0	0
YERPE	1243291	82350	10536	0	76539	4725	0	5811	0	0	318.14	21.1	2.7	0	0.0662	0.00974	0	1.49	0	0	0.0608	0	0.451	1437	1011	69	55	1359	948	7	7	1165926	75681	10008	0	70217	4544	0	5464	0	0	317.43	20.6	2.72	0	0.0652	0.0097	0	1.49
YMTV5	42362	2125	231	0	1985	91	0	140	0	0	302.59	15.2	1.65	0	0.0731	0.00752	0	1	0	0	0.0721	0	0.567	40	30	1	1	37	28	0	0	42028	2125	231	0	1985	91	0	140	0	0	302.36	15.3	1.66	0	0.0737	0.00757	0	1.01
[truncated: 13 more columns]

## Sheet: VSL2B-paircoil
ORG	ALLRES	IDP_RES	CC_RES	CLG_RES	PURE_IDP_RES	PURE_CC_RES	PURE_CLG_RES	CC_IDP	CLG_IDP	CC_CLG	RES_PERSEQ	IDP_PERSEQ	CC_PERSEQ	CLG_PERSEQ	IDP_PER_LEN_PERSEQ	CC_PER_LEN_PERSEQ	CLG_PER_LEN_PERSEQ	CC_IDP_PERSEQ	CLG_IDP_PERSEQ	CLG_CC_PERSEQ	CCIDP_PER_IDP_PERSEQ	CLGIDP_PER_IDP_PERSEQ	CCIDP_PER_CC_PERSEQ	IDP_SEG	IDP_SEGSQ	CC_SEG	CC_SEGSQ	PURE_IDP_SEG	PURE_IDP_SEGSQ	PURE_CC_SEG	PURE_CC_SEGSQ	ALLRES_40	IDP_RES_40	CC_RES_40	CLG_RES_40	PURE_IDP_RES_40	PURE_CC_RES_40	PURE_CLG_RES_40	CC_IDP_40	CLG_IDP_40	CC_CLG_40	RES_PERSEQ_40	IDP_PERSEQ_40	CC_PERSEQ_40	CLG_PERSEQ_40	IDP_PER_LEN_PERSEQ_40	CC_PER_LEN_PERSEQ_40	CLG_PER_LEN_PERSEQ_40	CC_IDP_PERSEQ_40
AADNV	1532	566	0	0	566	0	0	0	0	0	510.67	189	0	0	0.359	0	0	0	0	0	0	0	NaN	8	3	0	0	8	3	0	0
AAV2S	2601	594	0	0	594	0	0	0	0	0	520.2	119	0	0	0.207	0	0	0	0	0	0	0	NaN	11	5	0	0	11	5	0	0
ABLVB	3612	467	0	0	467	0	0	0	0	0	722.4	93.4	0	0	0.189	0	0	0	0	0	0	0	NaN	10	5	0	0	10	5	0	0
ABPVR	2902	212	0	0	212	0	0	0	0	0	967.33	70.7	0	0	0.163	0	0	0	0	0	0	0	NaN	5	3	0	0	5	3	0	0
ABVP	7181	693	30	0	693	30	0	0	0	0	132.98	12.8	0.556	0	0.0819	0.00118	0	0	0	0	0	0	0	14	12	1	1	14	12	1	1	7181	693	30	0	693	30	0	0	0	0	132.98	12.8	0.556	0	0.0819	0.00118	0	0
ACLSP	2537	390	0	0	390	0	0	0	0	0	845.67	130	0	0	0.185	0	0	0	0	0	0	0	NaN	4	2	0	0	4	2	0	0
ADE02	12874	4955	77	0	4878	0	0	77	0	0	286.09	110	1.71	0	0.435	0.0127	0	1.71	0	0	0.0358	0	1	51	36	2	2	50	35	0	0	12679	4830	77	0	4753	0	0	77	0	0	288.16	110	1.75	0	0.43	0.013	0	1.75
ADEF1	8125	1056	0	0	1056	0	0	0	0	0	353.26	45.9	0	0	0.196	0	0	0	0	0	0	0	NaN	19	16	0	0	19	16	0	0	8018	1013	0	0	1013	0	0	0	0	0	364.45	46	0	0	0.187	0	0	0
ADEG1	12494	2258	0	0	2258	0	0	0	0	0	328.79	59.4	0	0	0.206	0	0	0	0	0	0	0	NaN	27	21	0	0	27	21	0	0	12494	2258	0	0	2258	0	0	0	0	0	328.79	59.4	0	0	0.206	0	0	0
ADEO7	9187	1225	0	0	1225	0	0	0	0	0	306.23	40.8	0	0	0.16	0	0	0	0	0	0	0	NaN	20	15	0	0	20	15	0	0	8814	1166	0	0	1166	0	0	0	0	0	326.44	43.2	0	0	0.14	0	0	0
ADVG	1383	302	0	0	302	0	0	0	0	0	345.75	75.5	0	0	0.433	0	0	0	0	0	0	0	NaN	6	4	0	0	6	4	0	0
AEDAE	7684696	2309093	151582	1220	2180942	24651	0	126931	1220	0	461.43	139	9.1	0.0733	0.269	0.0156	7.16e-05	7.62	0.0733	0	0.0365	0.000203	0.751	21565	10732	2711	1590	21370	10623	437	384	5831795	1930658	120073	942	1829772	20129	0	99944	942	0	493.3	163	10.2	0.0797	0.297	0.0163	7.28e-05	8.45
AEVCA	2134	103	0	0	103	0	0	0	0	0	2134	103	0	0	0.0483	0	0	0	0	0	0	0	NaN	2	1	0	0	2	1	0	0
AFV1Y	6405	210	31	0	210	31	0	0	0	0	160.12	5.25	0.775	0	0.0287	0.00824	0	0	0	0	0	0	0	5	5	1	1	5	5	1	1	6357	210	31	0	210	31	0	0	0	0	163	5.38	0.795	0	0.0295	0.00846	0	0
AFV2P	9110	543	61	0	512	30	0	31	0	0	175.19	10.4	1.17	0	0.0542	0.00771	0	0.596	0	0	0.0608	0	0.5	10	10	2	2	9	9	1	1	9110	543	61	0	512	30	0	31	0	0	175.19	10.4	1.17	0	0.0542	0.00771	0	0.596
AGRT5	1660808	130316	10173	0	123332	3189	0	6984	0	0	310.78	24.4	1.9	0	0.0856	0.00538	0	1.31	0	0	0.0334	0	0.617	2341	1713	253	185	2260	1679	72	69	1502253	121318	9240	0	114925	2847	0	6393	0	0	309.42	25	1.9	0	0.0886	0.00548	0	1.32
AHV2H	1317	169	0	0	169	0	0	0	0	0	658.5	84.5	0	0	0.129	0	0	0	0	0	0	0	NaN	3	2	0	0	3	2	0	0
AILME	11395861	3911309	327009	32601	3600684	48966	10	278034	32582	0	539.09	185	15.5	1.54	0.308	0.0224	0.00157	13.2	1.54	0	0.044	0.00356	0.779	36309	15506	5490	2649	35810	15325	801	590	7593726	2853592	222985	17398	2642028	28806	10	194176	17385	0	561.67	211	16.5	1.29	0.343	0.0234	0.00141	14.4
AJECG	4155681	1397844	54298	69	1350580	7103	0	47195	69	0	451.02	152	5.89	0.00749	0.315	0.0102	2.07e-05	5.12	0.00749	0	0.0199	5.38e-05	0.805	14392	6997	1079	699	14398	6966	109	103	4016255	1381151	53736	69	1334231	6885	0	46851	69	0	452.79	156	6.06	0.00778	0.323	0.0105	2.15e-05	5.28
ALHV1	34799	5480	220	0	5380	120	0	100	0	0	497.13	78.3	3.14	0	0.157	0.00949	0	1.43	0	0	0.0297	0	0.446	45	31	7	7	46	31	3	3	34799	5480	220	0	5380	120	0	100	0	0	497.13	78.3	3.14	0	0.157	0.00949	0	1.43
AMEPV	71083	4531	879	0	3875	223	0	656	0	0	255.69	16.3	3.16	0	0.0693	0.0127	0	2.36	0	0	0.139	0	0.734	71	57	17	16	60	51	3	3	67732	3959	523	0	3630	194	0	329	0	0	254.63	14.9	1.97	0	0.0636	0.00963	0	1.24
AMPQE	11680538	2695675	289781	12034	2424120	30204	56	259577	11978	0	392.74	90.6	9.74	0.405	0.216	0.021	0.000831	8.73	0.403	0	0.0652	0.00263	0.834	30223	16980	4988	3069	29456	16526	457	420	6660650	1891695	178665	7061	1724935	18947	19	159718	7042	0	444.99	126	11.9	0.472	0.269	0.0219	0.000684	10.7
AMPV1	4353	938	30	0	938	30	0	0	0	0	483.67	104	3.33	0	0.271	0.00621	0	0	0	0	0	0	0	9	7	1	1	9	7	1	1
AMVLE	2437	258	36	0	258	36	0	0	0	0	609.25	64.5	9	0	0.153	0.00799	0	0	0	0	0	0	0	7	4	1	1	7	4	1	1
ANOCA	10131784	3309078	297417	28605	3024320	41213	44	256197	28554	0	530.21	173	15.6	1.5	0.292	0.0244	0.00156	13.4	1.49	0	0.0513	0.00377	0.791	30814	13721	4965	2495	30264	13490	651	514	6811032	2342993	217370	15694	2139541	29578	27	187785	15660	0	558.69	192	17.8	1.29	0.311	0.027	0.00132	15.4
ANODA	5911342	2221543	99969	3297	2135482	17180	25	82789	3272	0	516.86	194	8.74	0.288	0.347	0.0139	0.000339	7.24	0.286	0	0.0275	0.000595	0.755	19720	8883	1887	1124	19615	8819	300	260	5627809	2194145	97840	2808	2110173	16660	16	81180	2792	0	525.37	205	9.13	0.262	0.363	0.0143	0.000323	7.58
ANOGA	7037845	2332824	135321	3527	2217112	23136	0	112185	3527	0	538.39	178	10.4	0.27	0.278	0.0155	0.00034	8.58	0.27	0	0.0353	0.000629	0.755	19681	8682	2457	1326	19546	8596	402	320	5788611	2038109	116391	2354	1939251	19887	0	96504	2354	0	561.51	198	11.3	0.228	0.301	0.0162	0.000284	9.36
APIME	5942177	1891462	146765	7297	1760752	23338	14	123427	7283	0	542.27	173	13.4	0.666	0.262	0.0192	0.000635	11.3	0.665	0	0.0474	0.00143	0.768	16564	6988	2570	1358	16312	6869	396	318	5179731	1703072	124732	5790	1593115	20556	9	104176	5781	0	560.64	184	13.5	0.627	0.274	0.0196	0.000593	11.3
APRVF	7194	432	34	0	432	34	0	0	0	0	799.33	48	3.78	0	0.0747	0.00318	0	0	0	0	0	0	0	8	6	1	1	8	6	1	1
AQRVC	7609	681	121	0	603	43	0	78	0	0	634.08	56.8	10.1	0	0.112	0.0136	0	6.5	0	0	0.034	0	0.645	10	7	3	1	10	7	1	1	7609	681	121	0	603	43	0	78	0	0	634.08	56.8	10.1	0	0.112	0.0136	0	6.5
AQRVG	7577	1030	104	0	941	15	0	89	0	0	631.42	85.8	8.67	0	0.191	0.0118	0	7.42	0	0	0.0214	0	0.856	16	10	2	1	15	10	0	0	7577	1030	104	0	941	15	0	89	0	0	631.42	85.8	8.67	0	0.191	0.0118	0	7.42
AQUAE	488962	34852	8226	0	28784	2158	0	6068	0	0	314.85	22.4	5.3	0	0.0766	0.0168	0	3.91	0	0	0.111	0	0.645	666	510	168	127	591	465	38	36	473754	33547	7998	0	27639	2090	0	5908	0	0	314.79	22.3	5.31	0	0.0767	0.0168	0	3.93
ARATH	12988977	3382578	203494	29	3210825	31770	0	171724	29	0	408.36	106	6.4	0.000912	0.264	0.0136	3.75e-06	5.4	0.000912	0	0.0309	1.2e-05	0.781	39743	21897	3995	2650	39310	21691	518	473	6162071	1891730	108860	29	1798633	15792	0	93068	29	0	402.17	123	7.1	0.00189	0.307	0.0145	7.79e-06	6.07
ARCFU	660835	33776	6269	0	29442	1935	0	4334	0	0	275.58	14.1	2.61	0	0.0624	0.00943	0	1.81	0	0	0.0678	0	0.557	698	608	138	96	636	563	44	39	607884	31244	5784	0	27208	1748	0	4036	0	0	275.93	14.2	2.63	0	0.0621	0.00957	0	1.83
ASFB7	49803	3603	139	0	3541	77	0	62	0	0	334.25	24.2	0.933	0	0.102	0.00256	0	0.416	0	0	0.00452	0	0.333	54	46	3	3	54	46	2	2	45275	3603	139	0	3541	77	0	62	0	0	332.9	26.5	1.02	0	0.112	0.0028	0	0.456
ASGVP	2425	331	0	0	331	0	0	0	0	0	1212.5	166	0	0	0.195	0	0	0	0	0	0	0	NaN	5	2	0	0	5	2	0	0
ASHGO	2330700	569459	37045	0	539473	7059	0	29986	0	0	489.64	120	7.78	0	0.241	0.0162	0	6.3	0	0	0.039	0	0.737	6315	3319	757	502	6194	3270	132	122	2255986	562200	36563	0	532525	6888	0	29675	0	0	491.71	123	7.97	0	0.247	0.0166	0	6.47
ASPFU	4742739	1347433	59759	210	1295505	8041	0	51718	210	0	491.53	140	6.19	0.0218	0.267	0.0107	0.000102	5.36	0.0218	0	0.0228	0.000165	0.796	14086	6940	1161	776	14074	6907	129	123	4366533	1311749	59131	210	1260290	7882	0	51249	210	0	495.3	149	6.71	0.0238	0.284	0.0115	0.000111	5.81
ASPVP	3010	311	0	0	311	0	0	0	0	0	602	62.2	0	0	0.113	0	0	0	0	0	0	0	NaN	3	2	0	0	3	2	0	0
ATV	19264	3033	236	0	2896	99	0	137	0	0	267.56	42.1	3.28	0	0.0953	0.00481	0	1.9	0	0	0.0392	0	0.604	36	21	6	5	35	21	2	2	18073	2871	236	0	2734	99	0	137	0	0	265.78	42.2	3.47	0	0.0946	0.00509	0	2.01
BABBO	1850772	346769	23481	0	328988	5700	0	17781	0	0	501.97	94.1	6.37	0	0.185	0.0117	0	4.82	0	0	0.0334	0	0.685	4636	2340	477	316	4503	2316	105	95	1665251	305374	19733	0	290738	5097	0	14636	0	0	495.61	90.9	5.87	0	0.184	0.0117	0	4.36
BACAN	1439306	98767	14137	696	87845	3909	2	10228	694	0	262.03	18	2.57	0.127	0.0746	0.00844	0.00038	1.86	0.126	0	0.0674	0.00324	0.628	1778	1324	317	241	1658	1259	85	81	1267270	89048	13014	594	79048	3606	2	9408	592	0	259.26	18.2	2.66	0.122	0.076	0.00864	0.000336	1.92
BACCR	1453967	108383	15405	2284	95349	4655	0	10750	2284	0	277.47	20.7	2.94	0.436	0.0736	0.0102	0.000827	2.05	0.436	0	0.0707	0.00609	0.611	1832	1286	351	267	1708	1220	108	97	1267079	94144	13972	1750	82555	4133	0	9839	1750	0	273.43	20.3	3.02	0.378	0.0738	0.0103	0.000657	2.12
BACSU	1230988	102971	12521	0	94026	3576	0	8945	0	0	293.16	24.5	2.98	0	0.0926	0.0108	0	2.13	0	0	0.0622	0	0.62	1852	1310	289	218	1757	1247	82	79	1103278	95238	11880	0	86792	3434	0	8446	0	0	288.67	24.9	3.11	0	0.0955	0.0114	0	2.21
BACTN	1864427	82582	11927	87	76081	5513	0	6414	87	0	389.88	17.3	2.49	0.0182	0.05	0.00647	1.46e-05	1.34	0.0182	0	0.0619	0.000804	0.473	1643	1269	286	238	1537	1202	126	121	1573896	72356	10807	87	66381	4919	0	5888	87	0	381.09	17.5	2.62	0.0211	0.0519	0.00691	1.69e-05	1.43
BATDJ	3887913	1015443	62829	97	966996	14479	0	48350	97	0	451.56	118	7.3	0.0113	0.25	0.0155	4.08e-05	5.62	0.0113	0	0.0355	0.000167	0.721	11291	5541	1391	848	11044	5487	234	199	3284489	891635	53598	97	850090	12150	0	41448	97	0	480.54	130	7.84	0.0142	0.256	0.0144	5.14e-05	6.06
BAVJK	5924	364	44	0	332	12	0	32	0	0	493.67	30.3	3.67	0	0.07	0.00863	0	2.67	0	0	0.124	0	0.727	6	6	1	1	5	5	0	0	5924	364	44	0	332	12	0	32	0	0	493.67	30.3	3.67	0	0.07	0.00863	0	2.67
BAYMY	3300	385	31	0	367	13	0	18	0	0	1650	192	15.5	0	0.13	0.0174	0	9	0	0	0.0634	0	0.581	8	2	1	1	7	2	0	0
BBTVA	1023	137	0	0	137	0	0	0	0	0	146.14	19.6	0	0	0.111	0	0	0	0	0	0	0	NaN	3	3	0	0	3	3	0	0
BBWVS	2860	150	0	0	150	0	0	0	0	0	1430	75	0	0	0.0651	0	0	0	0	0	0	0	NaN	4	2	0	0	4	2	0	0
BCTVC	1196	232	0	0	232	0	0	0	0	0	170.86	33.1	0	0	0.289	0	0	0	0	0	0	0	NaN	4	4	0	0	4	4	0	0
BDVV	2927	256	0	0	256	0	0	0	0	0	585.4	51.2	0	0	0.203	0	0	0	0	0	0	0	NaN	5	3	0	0	5	3	0	0
BECN1	2435	351	0	0	351	0	0	0	0	0	1217.5	176	0	0	0.411	0	0	0	0	0	0	0	NaN	6	2	0	0	6	2	0	0
BEFVB	4809	462	0	0	462	0	0	0	0	0	400.75	38.5	0	0	0.0864	0	0	0	0	0	0	0	NaN	8	5	0	0	8	5	0	0	4809	462	0	0	462	0	0	0	0	0	400.75	38.5	0	0	0.0864	0	0	0
BGYMJ	1755	288	0	0	288	0	0	0	0	0	195	32	0	0	0.201	0	0	0	0	0	0	0	NaN	5	4	0	0	5	4	0	0
BIFLO	638887	84912	4315	0	81424	827	0	3488	0	0	370.37	49.2	2.5	0	0.136	0.00589	0	2.02	0	0	0.025	0	0.712	1386	881	97	73	1363	870	15	15	612243	83183	4254	0	79753	824	0	3430	0	0	369.71	50.2	2.57	0	0.139	0.00603	0	2.07
BMV	2275	275	0	0	275	0	0	0	0	0	568.75	68.8	0	0	0.122	0	0	0	0	0	0	0	NaN	6	3	0	0	6	3	0	0
BNYVS	4291	469	0	0	469	0	0	0	0	0	476.78	52.1	0	0	0.111	0	0	0	0	0	0	0	NaN	8	4	0	0	8	4	0	0
BOMMO	6003903	1793246	110777	5490	1696843	19848	16	90929	5474	0	406.3	121	7.5	0.372	0.272	0.0146	0.000418	6.15	0.37	0	0.0343	0.000902	0.762	18353	9267	2107	1192	18109	9135	328	274	5420915	1719182	107715	4225	1626365	19123	0	88592	4225	0	428.46	136	8.51	0.334	0.291	0.0161	0.000383	7
BORBU	381092	46413	7304	0	40845	1736	0	5568	0	0	295.65	36	5.67	0	0.132	0.0196	0	4.32	0	0	0.0821	0	0.707	760	547	165	115	707	520	25	23	310717	31473	4431	0	28281	1239	0	3192	0	0	312.59	31.7	4.46	0	0.111	0.0133	0	3.21
BORPE	1065161	89766	4895	40	86005	1174	0	3721	40	0	326.64	27.5	1.5	0.0123	0.0877	0.0044	2.33e-05	1.14	0.0123	0	0.0249	0.0001	0.675	1648	1167	117	90	1616	1153	24	24	959672	84435	4709	40	80857	1171	0	3538	40	0	324.43	28.5	1.59	0.0135	0.0926	0.00473	2.57e-05	1.2
BOTVF	2198	569	0	0	569	0	0	0	0	0	1099	284	0	0	0.33	0	0	0	0	0	0	0	NaN	7	2	0	0	7	2	0	0
BOTVX	2351	553	0	0	553	0	0	0	0	0	470.2	111	0	0	0.315	0	0	0	0	0	0	0	NaN	6	4	0	0	6	4	0	0
BOVIN	12700801	4335224	372047	33335	3984248	54362	2	317643	33291	0	532.08	182	15.6	1.4	0.302	0.0231	0.00159	13.3	1.39	0	0.0462	0.00355	0.78	39821	17358	6188	3032	39316	17139	874	669	7675561	2931275	230606	19925	2710358	29605	2	200994	19916	0	580.73	222	17.4	1.51	0.345	0.0242	0.00158	15.2
BPCHP	1648	100	0	0	100	0	0	0	0	0	206	12.5	0	0	0.159	0	0	0	0	0	0	0	NaN	3	3	0	0	3	3	0	0
BPHC1	9882	1225	59	0	1174	8	0	51	0	0	241.02	29.9	1.44	0	0.107	0.0125	0	1.24	0	0	0.0769	0	0.864	18	13	1	1	17	12	0	0	9882	1225	59	0	1174	8	0	51	0	0	241.02	29.9	1.44	0	0.107	0.0125	0	1.24
BPL2	3273	76	39	0	76	39	0	0	0	0	233.79	5.43	2.79	0	0.0486	0.0173	0	0	0	0	0	0	0	2	2	1	1	2	2	1	1	3273	76	39	0	76	39	0	0	0	0	233.79	5.43	2.79	0	0.0486	0.0173	0	0
BPLC2	6900	836	178	0	689	31	0	147	0	0	176.92	21.4	4.56	0	0.107	0.0139	0	3.77	0	0	0.132	0	0.75	14	11	4	4	12	9	1	1	6900	836	178	0	689	31	0	147	0	0	176.92	21.4	4.56	0	0.107	0.0139	0	3.77
BPM13	1945	236	0	0	236	0	0	0	0	0	216.11	26.2	0	0	0.0618	0	0	0	0	0	0	0	NaN	4	2	0	0	4	2	0	0
BPML5	15251	2126	229	0	1975	78	0	151	0	0	179.42	25	2.69	0	0.173	0.0148	0	1.78	0	0	0.0731	0	0.7	44	35	6	6	41	32	1	1	15251	2126	229	0	1975	78	0	151	0	0	179.42	25	2.69	0	0.173	0.0148	0	1.78
BPMS2	1143	31	0	0	31	0	0	0	0	0	285.75	7.75	0	0	0.103	0	0	0	0	0	0	0	NaN	1	1	0	0	1	1	0	0
BPMU	11133	1316	99	0	1279	62	0	37	0	0	214.1	25.3	1.9	0	0.122	0.00929	0	0.712	0	0	0.0293	0	0.382	25	18	3	3	24	17	1	1	11133	1316	99	0	1279	62	0	37	0	0	214.1	25.3	1.9	0	0.122	0.00929	0	0.712
BPMX1	1469	132	0	0	132	0	0	0	0	0	367.25	33	0	0	0.156	0	0	0	0	0	0	0	NaN	3	2	0	0	3	2	0	0
BPN15	14190	1900	181	0	1822	103	0	78	0	0	236.5	31.7	3.02	0	0.127	0.0115	0	1.3	0	0	0.0268	0	0.4	33	23	5	5	34	23	3	3	14053	1780	181	0	1702	103	0	78	0	0	238.19	30.2	3.07	0	0.114	0.0117	0	1.32
BPN4	22029	2116	292	0	1910	86	0	206	0	0	305.96	29.4	4.06	0	0.0769	0.00813	0	2.86	0	0	0.0633	0	0.711	37	19	8	6	34	18	2	2	22029	2116	292	0	1910	86	0	206	0	0	305.96	29.4	4.06	0	0.0769	0.00813	0	2.86
BPP1	28126	4108	760	0	3515	167	0	593	0	0	255.69	37.3	6.91	0	0.113	0.0207	0	5.39	0	0	0.108	0	0.709	70	41	16	14	68	38	2	2	27687	4010	730	0	3441	161	0	569	0	0	256.36	37.1	6.76	0	0.111	0.02	0	5.27
BPP2	10467	1083	186	0	906	9	0	177	0	0	243.42	25.2	4.33	0	0.0941	0.0123	0	4.12	0	0	0.0985	0	0.932	18	14	5	3	17	14	0	0	10376	1083	186	0	906	9	0	177	0	0	247.05	25.8	4.43	0	0.0964	0.0126	0	4.21
BPP22	12419	1821	272	0	1696	147	0	125	0	0	194.05	28.5	4.25	0	0.15	0.019	0	1.95	0	0	0.0718	0	0.622	34	24	6	5	32	22	2	2	12419	1821	272	0	1696	147	0	125	0	0	194.05	28.5	4.25	0	0.15	0.019	0	1.95
BPPH6	3573	90	0	0	90	0	0	0	0	0	274.85	6.92	0	0	0.0166	0	0	0	0	0	0	0	NaN	2	2	0	0	2	2	0	0	3573	90	0	0	90	0	0	0	0	0	274.85	6.92	0	0	0.0166	0	0	0
BPPHC	12454	2051	38	48	2003	38	0	0	48	0	234.98	38.7	0.717	0.906	0.153	0.00797	0.00147	0	0.906	0	0	0.0163	0	39	22	1	1	38	22	1	1	12361	2020	38	48	1972	38	0	0	48	0	237.71	38.8	0.731	0.923	0.149	0.00812	0.0015	0
BPPHE	42234	5562	1132	0	4683	253	0	879	0	0	191.1	25.2	5.12	0	0.132	0.0304	0	3.98	0	0	0.153	0	0.802	90	70	28	19	77	58	4	3	41987	5519	1099	0	4673	253	0	846	0	0	191.72	25.2	5.02	0	0.132	0.0299	0	3.86
BPPHM	1677	536	41	0	495	0	0	41	0	0	152.45	48.7	3.73	0	0.507	0.0187	0	3.73	0	0	0.0318	0	1	9	8	1	1	10	8	0	0	1677	536	41	0	495	0	0	41	0	0	152.45	48.7	3.73	0	0.507	0.0187	0	3.73
BPPHS	1986	372	30	0	342	0	0	30	0	0	198.6	37.2	3	0	0.241	0.00915	0	3	0	0	0.0341	0	1	5	4	1	1	5	4	0	0	1986	372	30	0	342	0	0	30	0	0	198.6	37.2	3	0	0.241	0.00915	0	3
BPPM2	3126	369	38	0	369	38	0	0	0	0	148.86	17.6	1.81	0	0.133	0.0115	0	0	0	0	0	0	0	6	5	1	1	6	5	1	1	3126	369	38	0	369	38	0	0	0	0	148.86	17.6	1.81	0	0.133	0.0115	0	0
BPPRD	4863	718	155	0	612	49	0	106	0	0	162.1	23.9	5.17	0	0.133	0.0423	0	3.53	0	0	0.103	0	0.647	10	9	4	4	11	9	1	1	4809	718	155	0	612	49	0	106	0	0	165.83	24.8	5.34	0	0.137	0.0438	0	3.66
BPSPB	38336	4995	1058	0	4057	120	0	938	0	0	207.22	27	5.72	0	0.0924	0.0172	0	5.07	0	0	0.0875	0	0.749	76	49	27	12	75	46	3	3	38336	4995	1058	0	4057	120	0	938	0	0	207.22	27	5.72	0	0.0924	0.0172	0	5.07
BPT4	53409	5326	675	0	4869	218	0	457	0	0	195.64	19.5	2.47	0	0.0913	0.0105	0	1.67	0	0	0.094	0	0.792	98	81	16	13	85	72	2	2	52661	5296	675	0	4839	218	0	457	0	0	197.23	19.8	2.53	0	0.0928	0.0107	0	1.71
BPT5	32457	3760	479	0	3419	138	0	341	0	0	200.35	23.2	2.96	0	0.103	0.0104	0	2.1	0	0	0.0558	0	0.674	63	47	11	7	59	44	2	2	32287	3760	479	0	3419	138	0	341	0	0	200.54	23.4	2.98	0	0.103	0.0105	0	2.12
BPT7	12933	1994	148	0	1898	52	0	96	0	0	230.95	35.6	2.64	0	0.186	0.0199	0	1.71	0	0	0.0315	0	0.627	34	25	4	3	34	25	1	1	12458	1947	148	0	1851	52	0	96	0	0	230.7	36.1	2.74	0	0.186	0.0207	0	1.78
BPV3	2462	603	0	0	603	0	0	0	0	0	307.75	75.4	0	0	0.218	0	0	0	0	0	0	0	NaN	7	5	0	0	7	5	0	0
BPV5	2305	653	0	0	653	0	0	0	0	0	384.17	109	0	0	0.275	0	0	0	0	0	0	0	NaN	10	5	0	0	10	5	0	0
BRADI	12772608	3506340	166442	0	3367052	27154	0	139288	0	0	426.58	117	5.56	0	0.288	0.0118	0	4.65	0	0	0.0239	0	0.769	41162	22597	3290	2176	40880	22447	458	431	6782649	2230897	104002	0	2143378	16483	0	87519	0	0	433.29	143	6.64	0	0.349	0.0132	0	5.59
BRAFL	13248417	3808873	242319	15712	3584374	33504	28	208815	15684	0	464.14	133	8.49	0.55	0.27	0.0168	0.00139	7.32	0.549	0	0.0425	0.00449	0.801	38748	18505	4517	2719	38156	18134	549	481	8904304	2861483	185282	9326	2691601	24699	27	160583	9299	0	533.06	171	11.1	0.558	0.31	0.02	0.00111	9.61
BRAJA	2616478	279490	15912	0	268169	4591	0	11321	0	0	317.03	33.9	1.93	0	0.118	0.00551	0	1.37	0	0	0.0251	0	0.649	4734	3375	388	288	4625	3332	92	87	2257987	251531	14197	0	241681	4347	0	9850	0	0	316.91	35.3	1.99	0	0.124	0.00578	0	1.38
BRV1	13577	777	0	0	777	0	0	0	0	0	2262.83	130	0	0	0.163	0	0	0	0	0	0	0	NaN	11	5	0	0	11	5	0	0
BSMV	3148	572	30	0	542	0	0	30	0	0	449.71	81.7	4.29	0	0.254	0.028	0	4.29	0	0	0.0504	0	1	9	7	1	1	8	7	0	0
BSNV	2075	591	0	0	591	0	0	0	0	0	691.67	197	0	0	0.42	0	0	0	0	0	0	0	NaN	9	3	0	0	9	3	0	0
BSTV1	3093	249	34	0	249	34	0	0	0	0	3093	249	34	0	0.0805	0.011	0	0	0	0	0	0	0	5	1	1	1	5	1	1	1
BTV10	6470	794	132	0	680	18	0	114	0	0	588.18	72.2	12	0	0.205	0.0291	0	10.4	0	0	0.13	0	0.917	9	6	4	3	8	6	0	0	6145	587	102	0	503	18	0	84	0	0	614.5	58.7	10.2	0	0.162	0.0228	0	8.4
BUCAI	188274	9820	480	0	9549	209	0	271	0	0	329.15	17.2	0.839	0	0.0632	0.0038	0	0.474	0	0	0.0211	0	0.578	199	149	14	13	195	147	5	5	187955	9820	480	0	9549	209	0	271	0	0	329.75	17.2	0.842	0	0.0635	0.00382	0	0.475
BUNL8	4031	208	0	0	208	0	0	0	0	0	1007.75	52	0	0	0.127	0	0	0	0	0	0	0	NaN	4	2	0	0	4	2	0	0
BUNYW	4005	210	0	0	210	0	0	0	0	0	1001.25	52.5	0	0	0.0257	0	0	0	0	0	0	0	NaN	4	2	0	0	4	2	0	0
BURPS	1988282	227926	10273	299	220159	2805	0	7468	299	0	347.78	39.9	1.8	0.0523	0.116	0.00535	0.000104	1.31	0.0523	0	0.0233	0.00056	0.662	3687	2409	252	191	3612	2379	56	53	1757764	207528	9045	299	200686	2502	0	6543	299	0	343.78	40.6	1.77	0.0585	0.119	0.00521	0.000116	1.28
BVDVN	3988	208	0	0	208	0	0	0	0	0	3988	208	0	0	0.0522	0	0	0	0	0	0	0	NaN	4	1	0	0	4	1	0	0
BVY3	3491	497	0	0	497	0	0	0	0	0	3491	497	0	0	0.142	0	0	0	0	0	0	0	NaN	8	1	0	0	8	1	0	0
BYDVP	1988	521	37	0	521	37	0	0	0	0	331.33	86.8	6.17	0	0.257	0.00711	0	0	0	0	0	0	0	6	4	1	1	6	4	1	1
BYVU	5076	811	0	0	811	0	0	0	0	0	634.5	101	0	0	0.115	0	0	0	0	0	0	0	NaN	15	5	0	0	15	5	0	0
CAEBR	8656306	2457950	162685	23536	2293729	21673	325	141010	23209	0	398.91	113	7.5	1.08	0.273	0.0148	0.00309	6.5	1.07	0	0.0373	0.00641	0.804	25366	13794	3155	1939	25106	13597	378	336	7176768	2155411	142698	10483	2021307	18750	325	123946	10156	0	424.11	127	8.43	0.619	0.286	0.0162	0.00157	7.32
CAEEL	11023695	3116199	219057	25841	2898147	26837	7	192218	25832	0	438.27	124	8.71	1.03	0.254	0.0146	0.00299	7.64	1.03	0	0.0372	0.00642	0.811	30878	15532	4068	2327	30849	15331	481	413	6735548	1941250	128194	9379	1820540	16854	7	111338	9370	0	430.17	124	8.19	0.599	0.269	0.0152	0.00157	7.11
CAEJA	10583859	2986907	198949	29531	2788613	30179	7	168770	29524	0	301.85	85.2	5.67	0.842	0.276	0.0145	0.00274	4.81	0.842	0	0.0367	0.00589	0.79	34035	20820	3891	2680	33541	20460	507	447	5945410	1765321	113876	9416	1658483	16449	5	97427	9411	0	346.41	103	6.63	0.549	0.288	0.0147	0.00156	5.68
CALJA	21481571	7706289	665610	63183	7078292	100728	27	564841	63115	0	511.3	183	15.8	1.5	0.33	0.0257	0.00173	13.4	1.5	0	0.0472	0.0038	0.778	71180	31902	11137	5564	70033	31495	1649	1232	7946020	3028024	225840	21029	2810004	28842	7	196998	21022	0	545.71	208	15.5	1.44	0.354	0.0221	0.00162	13.5
CAMJE	507643	37410	6148	0	33194	1932	0	4216	0	0	312.78	23	3.79	0	0.0839	0.0141	0	2.6	0	0	0.0931	0	0.646	660	485	141	116	599	448	42	40	493410	35904	5972	0	31774	1842	0	4130	0	0	311.69	22.7	3.77	0	0.0841	0.0143	0	2.61
CAMVS	2303	868	37	0	831	0	0	37	0	0	383.83	145	6.17	0	0.41	0.0388	0	6.17	0	0	0.0678	0	1	10	6	1	1	9	5	0	0
CANAL	3836333	1143252	57617	57	1093117	7537	2	50080	55	0	421.16	126	6.33	0.00626	0.275	0.0122	4.57e-05	5.5	0.00604	0	0.0312	8.48e-05	0.812	11356	6226	1154	813	11334	6165	127	122	2934833	881973	44689	0	843282	5998	0	38691	0	0	420.7	126	6.41	0	0.277	0.012	0	5.55
CANFA	15284263	5680217	475545	47797	5222325	65433	13	410108	47780	0	578.49	215	18	1.81	0.339	0.0243	0.00174	15.5	1.81	0	0.0447	0.00345	0.787	49139	20422	7737	3574	48591	20227	1043	792	8119522	3254181	236097	19285	3028972	30164	5	205929	19276	0	581.59	233	16.9	1.38	0.377	0.0226	0.00145	14.8
CARMS	1256	137	0	0	137	0	0	0	0	0	314	34.2	0	0	0.226	0	0	0	0	0	0	0	NaN	3	3	0	0	3	3	0	0
CAUCR	1205709	145845	6779	0	140723	1657	0	5122	0	0	324.12	39.2	1.82	0	0.138	0.00566	0	1.38	0	0	0.0232	0	0.676	2455	1697	160	125	2401	1672	35	35	1139715	139063	6382	0	134234	1553	0	4829	0	0	322.96	39.4	1.81	0	0.139	0.00575	0	1.37
CAVC1	786	337	0	0	337	0	0	0	0	0	262	112	0	0	0.562	0	0	0	0	0	0	0	NaN	6	3	0	0	6	3	0	0
CAVPO	10375650	3345199	276720	28336	3078783	38623	8	238088	28319	0	521.13	168	13.9	1.42	0.287	0.0212	0.00151	12	1.42	0	0.0452	0.00338	0.783	31863	14029	4816	2376	31440	13853	633	520	7159812	2562624	206449	17173	2366679	27666	2	178774	17162	0	558.27	200	16.1	1.34	0.325	0.0234	0.00128	13.9
CCHFI	6111	803	0	0	803	0	0	0	0	0	2037	268	0	0	0.1	0	0	0	0	0	0	0	NaN	11	2	0	0	11	2	0	0
CENSY	623942	93051	2999	191	90549	688	0	2311	191	0	308.58	46	1.48	0.0945	0.16	0.00578	0.000202	1.14	0.0945	0	0.0185	0.000575	0.682	1527	946	73	53	1515	935	13	13	552340	79982	2730	191	77716	655	0	2075	191	0	303.15	43.9	1.5	0.105	0.159	0.00567	0.000224	1.14
CFMVN	1872	396	0	0	396	0	0	0	0	0	468	99	0	0	0.211	0	0	0	0	0	0	0	NaN	6	3	0	0	6	3	0	0
CHICK	9823606	3243499	312941	31733	2938819	39680	307	273254	31419	0	557.4	184	17.8	1.8	0.304	0.0248	0.00182	15.5	1.78	0	0.0488	0.00402	0.793	30663	13311	4969	2434	30146	13137	634	496	6509004	2309434	210099	17209	2108258	25823	303	184270	16900	0	573.43	203	18.5	1.52	0.326	0.0253	0.00145	16.2
CHIKS	3722	530	0	0	530	0	0	0	0	0	1861	265	0	0	0.144	0	0	0	0	0	0	0	NaN	7	2	0	0	7	2	0	0
CHLAA	1405705	93986	10491	21	86823	3349	0	7142	21	0	365.12	24.4	2.72	0.00545	0.0658	0.00741	1.05e-05	1.86	0.00545	0	0.0574	5.29e-05	0.572	1616	1178	234	166	1528	1126	67	64	1319664	86806	9394	21	80572	3181	0	6213	21	0	367.8	24.2	2.62	0.00585	0.0643	0.00725	1.13e-05	1.73
CHLRE	6548670	2481263	127096	114	2367049	12996	0	114100	114	0	456.77	173	8.86	0.00795	0.329	0.0161	4.74e-05	7.96	0.00795	0	0.0321	7.31e-05	0.829	24622	10678	2341	1260	24536	10560	195	182	5809459	2330538	118958	114	2223454	11988	0	106970	114	0	481.91	193	9.87	0.00946	0.354	0.0173	5.64e-05	8.87
CHLTE	631563	45805	4805	0	42235	1235	0	3570	0	0	280.69	20.4	2.14	0	0.093	0.00598	0	1.59	0	0	0.0414	0	0.666	884	703	111	74	847	685	25	22	612798	45033	4675	0	41584	1226	0	3449	0	0	280.97	20.6	2.14	0	0.0942	0.00603	0	1.58
CHLTR	312168	29400	3523	0	27101	1224	0	2299	0	0	348.79	32.8	3.94	0	0.103	0.0137	0	2.57	0	0	0.0696	0	0.62	481	330	84	67	445	312	25	24	311200	29400	3523	0	27101	1224	0	2299	0	0	349.66	33	3.96	0	0.103	0.0137	0	2.58
CHPVE	3787	268	32	0	260	24	0	8	0	0	1893.5	134	16	0	0.116	0.00506	0	4	0	0	0.026	0	0.25	7	2	1	1	6	2	0	0
CILVC	3953	258	0	0	258	0	0	0	0	0	658.83	43	0	0	0.104	0	0	0	0	0	0	0	NaN	4	3	0	0	4	3	0	0
CIOIN	5767451	1431445	142244	9519	1297621	17915	22	124327	9495	0	333.22	82.7	8.22	0.55	0.242	0.0197	0.00085	7.18	0.549	0	0.0507	0.00273	0.798	16343	9595	2460	1387	15935	9379	288	267	4787876	1290307	121449	5091	1178612	14824	21	106625	5070	0	325.64	87.8	8.26	0.346	0.262	0.0208	0.000623	7.25
CIOSA	9644552	1952218	219200	41024	1724362	32272	83	186915	40928	0	482.13	97.6	11	2.05	0.233	0.0193	0.00206	9.34	2.05	0	0.0525	0.00459	0.77	23094	12324	3694	1837	22254	12077	566	471	3842061	988469	88232	4231	908051	12035	8	76195	4221	0	361.98	93.1	8.31	0.399	0.287	0.0207	0.000601	7.18
CLBVS	2687	317	0	0	317	0	0	0	0	0	895.67	106	0	0	0.2	0	0	0	0	0	0	0	NaN	5	3	0	0	5	3	0	0
CLOAB	1176635	90911	12505	0	81727	3321	0	9184	0	0	305.86	23.6	3.25	0	0.0786	0.0102	0	2.39	0	0	0.0658	0	0.641	1616	1155	302	216	1529	1101	68	64	1062185	82679	11435	0	74282	3038	0	8397	0	0	303.39	23.6	3.27	0	0.0798	0.0102	0	2.4
CLOBH	1052452	83101	10387	0	75117	2403	0	7984	0	0	293.16	23.1	2.89	0	0.0836	0.00935	0	2.22	0	0	0.0624	0	0.672	1490	1066	242	189	1409	1025	51	51	954990	77329	9736	0	69791	2198	0	7538	0	0	291.87	23.6	2.98	0	0.0855	0.00917	0	2.3
CMVFN	2457	409	0	0	409	0	0	0	0	0	491.4	81.8	0	0	0.26	0	0	0	0	0	0	0	NaN	7	5	0	0	7	5	0	0
COCIM	4212036	1347160	56409	0	1297905	7154	0	49255	0	0	433.96	139	5.81	0	0.309	0.0107	0	5.07	0	0	0.0215	0	0.819	14074	7226	1110	733	14078	7191	115	105	3936947	1296964	53986	0	1249729	6751	0	47235	0	0	442.35	146	6.07	0	0.317	0.0105	0	5.31
COPC7	6160676	2044934	84499	40	1974198	13803	0	70696	40	0	461.99	153	6.34	0.003	0.307	0.0115	4.68e-06	5.3	0.003	0	0.0237	8.34e-06	0.764	19877	9945	1645	1163	19807	9879	240	225	5181052	1875277	79211	40	1808184	12158	0	67053	40	0	468.7	170	7.17	0.00362	0.334	0.0128	5.65e-06	6.07
COPV6	2357	741	30	0	711	0	0	30	0	0	336.71	106	4.29	0	0.353	0.0111	0	4.29	0	0	0.0338	0	1	10	6	1	1	9	6	0	0
CORGL	958275	93886	5541	236	89253	1109	35	4432	201	0	309.82	30.4	1.79	0.0763	0.102	0.00567	0.000121	1.43	0.065	0	0.0288	0.000785	0.743	1629	1183	127	96	1594	1163	23	21	914103	90194	5291	236	85779	1077	35	4214	201	0	311.56	30.7	1.8	0.0804	0.103	0.00566	0.000127	1.44
COXBU	512702	32157	4682	0	28857	1382	0	3300	0	0	282.48	17.7	2.58	0	0.084	0.00835	0	1.82	0	0	0.0636	0	0.62	595	465	107	88	560	442	32	31	500484	31599	4610	0	28299	1310	0	3300	0	0	285.5	18	2.63	0	0.0809	0.00852	0	1.88
COYMV	2221	713	183	0	557	27	0	156	0	0	740.33	238	61	0	0.33	0.203	0	52	0	0	0.406	0	0.795	9	3	3	3	7	2	0	0
CPMV1	809	0	0	0	0	0	0	0	0	0	809	0	0	0	0	0	0	0	0	0	NaN	NaN	NaN	0	0	0	0	0	0	0	0
CPMVS	4802	116	0	0	116	0	0	0	0	0	960.4	23.2	0	0	0.217	0	0	0	0	0	0	0	NaN	3	3	0	0	3	3	0	0
CPRVZ	473	0	0	0	0	0	0	0	0	0	473	0	0	0	0	0	0	0	0	0	NaN	NaN	NaN	0	0	0	0	0	0	0	0
CPSVP	3537	586	50	0	536	0	0	50	0	0	884.25	146	12.5	0	0.236	0.00517	0	12.5	0	0	0.0393	0	1	9	4	1	1	8	4	0	0
CPVKS	843	95	0	0	95	0	0	0	0	0	421.5	47.5	0	0	0.123	0	0	0	0	0	0	0	NaN	2	2	0	0	2	2	0	0
CRLVP	3210	314	0	0	314	0	0	0	0	0	1605	157	0	0	0.106	0	0	0	0	0	0	0	NaN	6	2	0	0	6	2	0	0
CRPVC	2666	204	0	0	204	0	0	0	0	0	1333	102	0	0	0.0673	0	0	0	0	0	0	0	NaN	4	2	0	0	4	2	0	0
CRPVK	2669	838	0	0	838	0	0	0	0	0	333.62	105	0	0	0.272	0	0	0	0	0	0	0	NaN	8	6	0	0	8	6	0	0
CRYHO	1757638	469535	27771	40	446356	4632	0	23139	40	0	452.3	121	7.15	0.0103	0.26	0.016	1.19e-05	5.95	0.0103	0	0.036	2.44e-05	0.772	5543	2706	593	378	5460	2667	80	75	1740721	466726	27711	40	443607	4632	0	23079	40	0	454.97	122	7.24	0.0105	0.262	0.0162	1.21e-05	6.03
CRYNJ	3446667	1288822	50226	25	1244460	5889	0	44337	25	0	535.53	200	7.8	0.00388	0.345	0.0122	3.46e-06	6.89	0.00388	0	0.0228	6.49e-06	0.834	12035	5256	982	630	12070	5233	93	85	3187825	1231340	48527	25	1188521	5733	0	42794	25	0	543.44	210	8.27	0.00426	0.359	0.0128	3.8e-06	7.3
CSVMV	2541	720	119	0	634	33	0	86	0	0	508.2	144	23.8	0	0.175	0.0297	0	17.2	0	0	0.119	0	0.806	8	3	3	2	9	3	1	1
CTFVL	9623	795	65	0	795	65	0	0	0	0	740.23	61.2	5	0	0.114	0.00717	0	0	0	0	0	0	0	10	7	2	1	10	7	2	1	9286	795	65	0	795	65	0	0	0	0	773.83	66.2	5.42	0	0.123	0.00777	0	0
CVH22	12928	324	81	0	324	81	0	0	0	0	1616	40.5	10.1	0	0.0667	0.00863	0	0	0	0	0	0	0	4	3	2	1	4	3	2	1
CVHSA	14377	785	77	0	785	77	0	0	0	0	958.47	52.3	5.13	0	0.0521	0.00409	0	0	0	0	0	0	0	12	4	2	1	12	4	2	1	9995	551	77	0	551	77	0	0	0	0	713.93	39.4	5.5	0	0.052	0.00438	0	0
CVMA5	14869	924	70	0	864	10	0	60	0	0	1351.73	84	6.36	0	0.103	0.00116	0	5.45	0	0	0.0422	0	0.857	14	5	2	2	12	5	0	0	10401	655	35	0	625	5	0	30	0	0	1040.1	65.5	3.5	0	0.107	0.000488	0	3
DANRE	20446653	6978134	631165	57476	6362808	73249	65	557915	57410	0	501.82	171	15.5	1.41	0.312	0.0256	0.00171	13.7	1.41	0	0.0526	0.00362	0.809	64198	29582	10177	5383	63390	29118	1217	990	8212303	3110981	260716	21165	2857322	28215	7	232501	21158	0	563.99	214	17.9	1.45	0.335	0.0262	0.00177	16
DAPPU	9947364	2842652	178353	14835	2680034	30539	31	147814	14804	0	330.07	94.3	5.92	0.492	0.279	0.0143	0.0015	4.9	0.491	0	0.0365	0.00307	0.764	31392	18480	3582	2363	30870	18151	540	486	6738843	2070858	121601	7358	1962723	20818	6	100783	7352	0	372.93	115	6.73	0.407	0.296	0.0141	0.00093	5.58
DEIRA	949308	141286	5986	25	136514	1239	0	4747	25	0	307.72	45.8	1.94	0.0081	0.152	0.00562	1.92e-05	1.54	0.0081	0	0.0216	0.000183	0.731	2334	1538	136	101	2303	1522	26	24	904498	137519	5737	25	132923	1166	0	4571	25	0	307.86	46.8	1.95	0.00851	0.155	0.00563	2.01e-05	1.56
DEN1W	3392	100	0	0	100	0	0	0	0	0	3392	100	0	0	0.0295	0	0	0	0	0	0	0	NaN	2	1	0	0	2	1	0	0
DESVH	1075413	120897	9725	32	113317	2177	0	7548	32	0	305.78	34.4	2.77	0.0091	0.125	0.00819	3.27e-05	2.15	0.0091	0	0.0459	9.26e-05	0.721	2003	1398	234	174	1920	1357	33	32	1014195	114714	8705	32	108014	2037	0	6668	32	0	305.76	34.6	2.62	0.00965	0.126	0.00809	3.47e-05	2.01
DHBVQ	1685	513	0	0	513	0	0	0	0	0	421.25	128	0	0	0.308	0	0	0	0	0	0	0	NaN	5	4	0	0	5	4	0	0
DICDI	6860265	2379161	122974	318	2265532	9663	0	113311	318	0	538.31	187	9.65	0.025	0.317	0.0153	1.88e-05	8.89	0.025	0	0.033	4.45e-05	0.88	21557	9483	2414	1559	21879	9408	172	156	5823568	2201947	118014	318	2092597	8982	0	109032	318	0	563.32	213	11.4	0.0308	0.342	0.0172	2.32e-05	10.5
DICTD	571687	22160	5573	0	18887	2300	0	3273	0	0	327.99	12.7	3.2	0	0.0451	0.00905	0	1.88	0	0	0.086	0	0.491	449	368	124	86	405	343	49	42	538801	21257	5440	0	18049	2232	0	3208	0	0	326.35	12.9	3.29	0	0.0452	0.00932	0	1.94
DPV83	51100	3148	145	0	3046	43	0	102	0	0	309.7	19.1	0.879	0	0.0877	0.00494	0	0.618	0	0	0.0229	0	0.73	55	46	4	4	56	46	1	1	51100	3148	145	0	3046	43	0	102	0	0	309.7	19.1	0.879	0	0.0877	0.00494	0	0.618
DROME	12848190	5268373	308131	6109	5004157	50023	1	258108	6108	0	651.5	267	15.6	0.31	0.332	0.0181	0.000325	13.1	0.31	0	0.0361	0.00068	0.776	40191	14494	5705	2621	40000	14393	884	610	6765333	2630099	132651	2043	2516907	21502	0	111149	2043	0	563.97	219	11.1	0.17	0.33	0.0158	0.000186	9.27
DROPS	8423158	3161283	158185	4603	3023064	24556	13	133629	4590	0	502.7	189	9.44	0.275	0.333	0.0143	0.000355	7.97	0.274	0	0.0298	0.000624	0.771	26461	11929	3024	1676	26409	11827	437	379	6729491	2641020	125463	1933	2533543	19909	10	105554	1923	0	522.68	205	9.74	0.15	0.354	0.0144	0.000231	8.2
DUGBA	6070	915	0	0	915	0	0	0	0	0	2023.33	305	0	0	0.127	0	0	0	0	0	0	0	NaN	15	3	0	0	15	3	0	0
DXV96	2266	549	0	0	549	0	0	0	0	0	755.33	183	0	0	0.36	0	0	0	0	0	0	0	NaN	7	3	0	0	7	3	0	0
EAVBU	4311	186	0	0	186	0	0	0	0	0	538.88	23.2	0	0	0.0644	0	0	0	0	0	0	0	NaN	3	2	0	0	3	2	0	0
EBLV1	3602	506	30	0	506	30	0	0	0	0	720.4	101	6	0	0.177	0.0201	0	0	0	0	0	0	0	11	4	1	1	11	4	1	1
EBLV2	3601	416	0	0	416	0	0	0	0	0	720.2	83.2	0	0	0.146	0	0	0	0	0	0	0	NaN	9	3	0	0	9	3	0	0
EBOZM	5494	929	65	0	899	35	0	30	0	0	610.44	103	7.22	0	0.203	0.0159	0	3.33	0	0	0.0196	0	0.483	11	8	2	2	9	8	0	0
EBVA8	40146	11645	182	0	11530	67	0	115	0	0	501.82	146	2.27	0	0.289	0.00556	0	1.44	0	0	0.00887	0	0.638	96	57	5	5	97	57	0	0	39801	11368	145	0	11262	39	0	106	0	0	503.81	144	1.84	0	0.282	0.00427	0	1.34
EBVB9	55127	22207	182	0	22092	67	0	115	0	0	467.18	188	1.54	0	0.429	0.00377	0	0.975	0	0	0.00562	0	0.638	138	90	5	5	139	90	0	0	42753	13844	145	0	13738	39	0	106	0	0	491.41	159	1.67	0	0.328	0.00388	0	1.22
ECOLI	1355945	71498	9299	0	65491	3292	0	6007	0	0	315.12	16.6	2.16	0	0.0595	0.00826	0	1.4	0	0	0.0577	0	0.557	1310	991	222	180	1249	947	74	68	1224993	65616	8248	0	60179	2811	0	5437	0	0	314.58	16.9	2.12	0	0.0597	0.00751	0	1.4
EHV2	36509	8201	142	0	8139	80	0	62	0	0	474.14	107	1.84	0	0.229	0.00124	0	0.805	0	0	0.00526	0	0.516	80	53	4	2	79	53	2	1	36173	7865	142	0	7803	80	0	62	0	0	475.96	103	1.87	0	0.219	0.00125	0	0.816
EMARV	3485	114	31	0	91	8	0	23	0	0	871.25	28.5	7.75	0	0.0379	0.00338	0	5.75	0	0	0.149	0	0.742	3	2	1	1	2	2	0	0
EMCVR	2420	210	39	0	210	39	0	0	0	0	1210	105	19.5	0	0.499	0.00851	0	0	0	0	0	0	0	4	2	1	1	4	2	1	1
EMENI	5089040	1384817	60350	170	1332506	8209	0	52141	170	0	482.14	131	5.72	0.0161	0.26	0.0101	3.73e-05	4.94	0.0161	0	0.0225	5.84e-05	0.794	14800	7465	1191	813	14808	7431	132	126	4616803	1337314	58474	170	1286486	7816	0	50658	170	0	485.01	140	6.14	0.0179	0.277	0.0107	4.13e-05	5.32
ENCCU	692194	105958	10949	0	96808	1799	0	9150	0	0	344.72	52.8	5.45	0	0.169	0.0143	0	4.56	0	0	0.056	0	0.772	1482	1022	239	155	1421	983	34	33	657181	98486	9949	0	90102	1565	0	8384	0	0	345.7	51.8	5.23	0	0.167	0.0141	0	4.41
ENTFA	953522	80874	12058	85	71262	2531	0	9527	85	0	294.3	25	3.72	0.0262	0.0865	0.0105	9.21e-05	2.94	0.0262	0	0.0706	0.000844	0.67	1324	950	248	176	1247	898	53	52	865009	70799	10376	85	62783	2445	0	7931	85	0	293.52	24	3.52	0.0288	0.0845	0.0103	0.000101	2.69
ENTHI	3380165	636743	86934	0	559999	10190	0	76744	0	0	424.7	80	10.9	0	0.2	0.0247	0	9.64	0	0	0.0746	0	0.804	7435	4709	1606	1059	7298	4552	201	180	2705099	518458	77290	0	449795	8627	0	68663	0	0	448.53	86	12.8	0	0.206	0.0277	0	11.4
FCVUR	2537	85	0	0	85	0	0	0	0	0	845.67	28.3	0	0	0.0161	0	0	0	0	0	0	0	NaN	2	1	0	0	2	1	0	0
FDVS	9186	658	84	0	574	0	0	84	0	0	765.5	54.8	7	0	0.0748	0.00828	0	7	0	0	0.0325	0	1	11	8	1	1	10	8	0	0	9186	658	84	0	574	0	0	84	0	0	765.5	54.8	7	0	0.0748	0.00828	0	7
FIPV	9371	471	0	0	471	0	0	0	0	0	937.1	47.1	0	0	0.0631	0	0	0	0	0	0	0	NaN	7	2	0	0	7	2	0	0	9371	471	0	0	471	0	0	0	0	0	937.1	47.1	0	0	0.0631	0	0	0
FLAPJ	805943	45216	6562	0	40619	1965	0	4597	0	0	333.03	18.7	2.71	0	0.0573	0.00794	0	1.9	0	0	0.06	0	0.568	811	609	143	108	762	582	47	44	783362	43859	6481	0	39292	1914	0	4567	0	0	334.77	18.7	2.77	0	0.057	0.00809	0	1.95
FOWPN	80735	6233	487	0	5863	117	0	370	0	0	321.65	24.8	1.94	0	0.0607	0.00645	0	1.47	0	0	0.0635	0	0.671	88	59	10	10	83	55	3	3	74901	4957	453	0	4587	83	0	370	0	0	305.72	20.2	1.85	0	0.0593	0.00653	0	1.51
FRATT	473408	23501	3320	0	21135	954	0	2366	0	0	309.82	15.4	2.17	0	0.062	0.00811	0	1.55	0	0	0.0802	0	0.671	442	347	80	70	402	320	22	20	465207	23110	3252	0	20776	918	0	2334	0	0	310.34	15.4	2.17	0	0.0615	0.00818	0	1.56
FRG3G	28355	7004	60	45	6929	30	0	30	45	0	289.34	71.5	0.612	0.459	0.277	0.00318	0.0085	0.306	0.459	0	0.0025	0.0144	0.5	92	58	2	2	91	57	1	1	28355	7004	60	45	6929	30	0	30	45	0	289.34	71.5	0.612	0.459	0.277	0.00318	0.0085	0.306
FUSNN	641087	50064	6856	0	44960	1752	0	5104	0	0	313.34	24.5	3.35	0	0.078	0.0124	0	2.49	0	0	0.0728	0	0.645	924	642	161	124	859	606	44	43	596044	45003	6410	0	40232	1639	0	4771	0	0	312.88	23.6	3.36	0	0.0773	0.0121	0	2.5
GAHVM	42491	7330	121	0	7293	84	0	37	0	0	472.12	81.4	1.34	0	0.205	0.00193	0	0.411	0	0	0.00203	0	0.356	93	59	3	2	93	59	2	1	42102	7182	121	0	7145	84	0	37	0	0	483.93	82.6	1.39	0	0.2	0.002	0	0.425
GASAC	13490632	4004569	376378	45453	3630826	48080	8	328298	45445	0	495.11	147	13.8	1.67	0.281	0.0229	0.00168	12	1.67	0	0.0486	0.00374	0.801	41622	19869	6264	3286	40936	19594	760	639	6849569	2359509	195548	19833	2165729	21596	5	173952	19828	0	520.88	179	14.9	1.51	0.332	0.0229	0.00152	13.2
GEOSL	1142096	96451	11664	0	88052	3265	0	8399	0	0	335.71	28.4	3.43	0	0.0907	0.00947	0	2.47	0	0	0.0684	0	0.655	1721	1201	269	204	1606	1140	59	58	1065464	87254	10365	0	80008	3119	0	7246	0	0	336.21	27.5	3.27	0	0.0896	0.00928	0	2.29
GFKVM	2645	891	0	0	891	0	0	0	0	0	661.25	223	0	0	0.587	0	0	0	0	0	0	0	NaN	7	4	0	0	7	4	0	0
GIAIC	3226528	766789	108568	36	685484	27299	0	81269	36	0	451.01	107	15.2	0.00503	0.229	0.0223	9.93e-06	11.4	0.00503	0	0.0595	4.28e-05	0.673	9342	4148	1944	793	8859	4077	428	314	3003904	692326	106547	36	612204	26461	0	80086	36	0	465.58	107	16.5	0.00558	0.216	0.0239	1.1e-05	12.4
GIBZE	5835308	1599892	69286	85	1540281	9759	1	59527	84	0	445.31	122	5.29	0.00649	0.262	0.0104	2.99e-05	4.54	0.00641	0	0.0234	0.000109	0.783	16852	9087	1394	961	16782	9026	171	162	5411408	1557829	68330	85	1498807	9392	1	58938	84	0	446.78	129	5.64	0.00702	0.276	0.011	3.23e-05	4.87
GLOVI	1377677	129031	12187	0	119974	3130	0	9057	0	0	312.68	29.3	2.77	0	0.102	0.01	0	2.06	0	0	0.058	0	0.678	2229	1620	287	228	2121	1545	65	62	1172232	111205	9619	0	104190	2604	0	7015	0	0	306.63	29.1	2.52	0	0.103	0.00886	0	1.83
GLRV3	7560	1011	0	0	1011	0	0	0	0	0	581.54	77.8	0	0	0.0415	0	0	0	0	0	0	0	NaN	13	3	0	0	13	3	0	0	5327	529	0	0	529	0	0	0	0	0	443.92	44.1	0	0	0.027	0	0	0
GLVWB	2793	116	0	0	116	0	0	0	0	0	1396.5	58	0	0	0.0479	0	0	0	0	0	0	0	NaN	2	2	0	0	2	2	0	0
GORGO	14626901	5279810	431118	41323	4872260	64708	165	366392	41140	0	536.06	193	15.8	1.51	0.333	0.0232	0.0015	13.4	1.51	0	0.0441	0.00316	0.789	48229	20812	7073	3477	47546	20567	1050	769	7902214	3026723	223125	21044	2810844	28214	76	194911	20968	0	537.42	206	15.2	1.43	0.352	0.0211	0.00143	13.3
GRVMC	1350	314	0	0	314	0	0	0	0	0	450	105	0	0	0.335	0	0	0	0	0	0	0	NaN	5	3	0	0	5	3	0	0
GVAIS	2450	372	0	0	372	0	0	0	0	0	490	74.4	0	0	0.194	0	0	0	0	0	0	0	NaN	8	4	0	0	8	4	0	0
GVCPM	36936	4750	1023	0	4055	328	0	695	0	0	258.29	33.2	7.15	0	0.133	0.0236	0	4.86	0	0	0.0655	0	0.583	73	58	19	11	72	56	7	6	36672	4750	1023	0	4055	328	0	695	0	0	260.09	33.7	7.26	0	0.135	0.0239	0	4.93
HAEIN	527691	28617	4706	0	25594	1683	0	3023	0	0	309.13	16.8	2.76	0	0.0574	0.0101	0	1.77	0	0	0.0685	0	0.535	518	387	110	82	483	370	38	33	514348	27716	4638	0	24693	1615	0	3023	0	0	308.92	16.6	2.79	0	0.0577	0.0102	0	1.82
HALSA	680106	129754	8589	0	122009	844	0	7745	0	0	280.34	53.5	3.54	0	0.196	0.00947	0	3.19	0	0	0.0285	0	0.839	2160	1382	173	100	2108	1364	11	10	631111	121364	7803	0	114346	785	0	7018	0	0	281.37	54.1	3.48	0	0.196	0.00906	0	3.13
HANTV	3715	249	35	0	214	0	0	35	0	0	1238.33	83	11.7	0	0.106	0.0272	0	11.7	0	0	0.124	0	1	4	3	1	1	4	3	0	0
HASV	2508	588	0	0	588	0	0	0	0	0	836	196	0	0	0.4	0	0	0	0	0	0	0	NaN	8	3	0	0	8	3	0	0
HASV1	3157	639	62	0	589	12	0	50	0	0	1052.33	213	20.7	0	0.218	0.0182	0	16.7	0	0	0.0883	0	0.806	11	3	2	2	9	3	0	0
HAVHM	2227	161	0	0	161	0	0	0	0	0	2227	161	0	0	0.0723	0	0	0	0	0	0	0	NaN	3	1	0	0	3	1	0	0
HBVCJ	1792	544	0	0	544	0	0	0	0	0	358.4	109	0	0	0.328	0	0	0	0	0	0	0	NaN	8	5	0	0	8	5	0	0
HCMVM	63402	15977	255	0	15792	70	0	185	0	0	377.39	95.1	1.52	0	0.237	0.00288	0	1.1	0	0	0.00751	0	0.719	195	114	7	6	196	114	1	1	62392	15660	255	0	15475	70	0	185	0	0	375.86	94.3	1.54	0	0.237	0.00291	0	1.11
HCVH	3173	413	0	0	413	0	0	0	0	0	1586.5	206	0	0	0.343	0	0	0	0	0	0	0	NaN	6	2	0	0	6	2	0	0
HDVD3	409	409	64	0	345	0	0	64	0	0	204.5	204	32	0	1	0.157	0	32	0	0	0.157	0	1	2	2	2	2	2	2	0	0
HELPY	491826	49664	8289	0	43657	2282	0	6007	0	0	316.69	32	5.34	0	0.107	0.0187	0	3.87	0	0	0.096	0	0.654	809	545	189	147	753	505	50	48	468765	46841	7772	0	41227	2158	0	5614	0	0	313.98	31.4	5.21	0	0.106	0.0185	0	3.76
HENDH	6056	1498	63	0	1498	63	0	0	0	0	672.89	166	7	0	0.327	0.0128	0	0	0	0	0	0	0	14	6	2	1	14	6	2	1
HEVCH	2467	320	0	0	320	0	0	0	0	0	822.33	107	0	0	0.325	0	0	0	0	0	0	0	NaN	4	3	0	0	4	3	0	0
HHV11	38368	11050	163	37	10903	53	0	110	37	0	525.59	151	2.23	0.507	0.314	0.00178	0.00162	1.51	0.507	0	0.0077	0.00343	0.651	120	62	5	3	120	62	1	1	38368	11050	163	37	10903	53	0	110	37	0	525.59	151	2.23	0.507	0.314	0.00178	0.00162	1.51
HHV2H	39568	11993	103	0	11901	11	0	92	0	0	534.7	162	1.39	0	0.312	0.0027	0	1.24	0	0	0.00731	0	0.892	121	62	3	3	119	62	0	0	38743	11400	103	0	11308	11	0	92	0	0	530.73	156	1.41	0	0.306	0.00273	0	1.26
HHV6U	44715	8567	181	0	8425	39	0	142	0	0	434.13	83.2	1.76	0	0.183	0.00219	0	1.38	0	0	0.0195	0	0.827	86	48	5	4	84	47	1	1	43605	7779	181	0	7637	39	0	142	0	0	436.05	77.8	1.81	0	0.179	0.00225	0	1.42
HHV6Z	43610	7509	177	0	7383	51	0	126	0	0	449.59	77.4	1.82	0	0.173	0.00266	0	1.3	0	0	0.0214	0	0.677	85	42	5	5	83	41	1	1	43610	7509	177	0	7383	51	0	126	0	0	449.59	77.4	1.82	0	0.173	0.00266	0	1.3
HHV8P	38742	7338	318	0	7042	22	0	296	0	0	450.49	85.3	3.7	0	0.182	0.0065	0	3.44	0	0	0.0137	0	0.824	73	46	4	4	72	46	0	0	38360	7073	318	0	6777	22	0	296	0	0	456.67	84.2	3.79	0	0.175	0.00665	0	3.52
HIS1I	4432	658	38	0	620	0	0	38	0	0	126.63	18.8	1.09	0	0.118	0.0103	0	1.09	0	0	0.0576	0	1	13	11	1	1	12	10	0	0	4432	658	38	0	620	0	0	38	0	0	126.63	18.8	1.09	0	0.118	0.0103	0	1.09
HMPVC	4142	502	37	0	502	37	0	0	0	0	460.22	55.8	4.11	0	0.204	0.00763	0	0	0	0	0	0	0	5	3	1	1	5	3	1	1
HORSE	12750829	4204594	448216	51815	3762904	58330	4	389879	51804	0	562.28	185	19.8	2.28	0.3	0.0321	0.00204	17.2	2.28	0	0.0685	0.00438	0.821	39092	16430	7089	3652	38484	16176	935	684	7136019	2596913	222178	18101	2385218	28576	1	193595	18093	0	560.88	204	17.5	1.42	0.33	0.0253	0.00133	15.2
HPBVH	1310	232	0	0	232	0	0	0	0	0	436.67	77.3	0	0	0.308	0	0	0	0	0	0	0	NaN	3	2	0	0	3	2	0	0
HPE2W	2179	102	0	0	102	0	0	0	0	0	2179	102	0	0	0.0468	0	0	0	0	0	0	0	NaN	2	1	0	0	2	1	0	0
HPV04	2459	620	0	0	620	0	0	0	0	0	351.29	88.6	0	0	0.234	0	0	0	0	0	0	0	NaN	9	5	0	0	9	5	0	0
HPV05	2827	947	0	0	947	0	0	0	0	0	353.38	118	0	0	0.335	0	0	0	0	0	0	0	NaN	8	5	0	0	8	5	0	0
HPV16	2452	508	0	0	508	0	0	0	0	0	306.5	63.5	0	0	0.259	0	0	0	0	0	0	0	NaN	8	7	0	0	8	7	0	0
HPV1A	2408	617	0	0	617	0	0	0	0	0	301	77.1	0	0	0.257	0	0	0	0	0	0	0	NaN	8	5	0	0	8	5	0	0
HPV41	2763	783	0	0	783	0	0	0	0	0	251.18	71.2	0	0	0.3	0	0	0	0	0	0	0	NaN	12	7	0	0	12	7	0	0	2763	783	0	0	783	0	0	0	0	0	251.18	71.2	0	0	0.3	0	0	0
HRSVB	4540	545	36	0	545	36	0	0	0	0	412.73	49.5	3.27	0	0.169	0.0057	0	0	0	0	0	0	0	6	5	1	1	6	5	1	1	4540	545	36	0	545	36	0	0	0	0	412.73	49.5	3.27	0	0.169	0.0057	0	0
HRV8A	2164	192	0	0	192	0	0	0	0	0	2164	192	0	0	0.0887	0	0	0	0	0	0	0	NaN	5	1	0	0	5	1	0	0
HTL1C	4121	1295	93	0	1215	13	0	80	0	0	457.89	144	10.3	0	0.412	0.0494	0	8.89	0	0	0.0676	0	0.86	14	7	2	1	14	7	0	0
HTL32	3469	811	0	0	811	0	0	0	0	0	578.17	135	0	0	0.311	0	0	0	0	0	0	0	NaN	10	5	0	0	10	5	0	0
HTLV2	3483	1021	0	0	1021	0	0	0	0	0	580.5	170	0	0	0.362	0	0	0	0	0	0	0	NaN	14	6	0	0	14	6	0	0
HUMAN	23391368	8355128	679488	53359	7717797	95460	56	584028	53303	0	339.32	121	9.86	0.774	0.321	0.0205	0.00108	8.47	0.773	0	0.043	0.00251	0.792	81431	43605	11746	6210	80145	42856	1602	1241	8764696	3460924	250880	21038	3220288	31258	24	219622	21014	0	456.14	180	13.1	1.09	0.361	0.0182	0.00125	11.4
HV19S	1607	238	0	0	238	0	0	0	0	0	803.5	119	0	0	0.152	0	0	0	0	0	0	0	NaN	2	2	0	0	2	2	0	0
HV1H2	3550	596	192	0	536	132	0	60	0	0	394.44	66.2	21.3	0	0.267	0.0246	0	6.67	0	0	0.0575	0	0.423	9	6	5	3	7	6	3	2
HV2BE	3836	1079	50	0	1079	50	0	0	0	0	426.22	120	5.56	0	0.375	0.00646	0	0	0	0	0	0	0	15	7	1	1	15	7	1	1
HYPBU	449830	24454	4022	0	21628	1196	0	2826	0	0	280.79	15.3	2.51	0	0.0653	0.00976	0	1.76	0	0	0.0681	0	0.618	513	424	82	64	474	398	27	23	436943	23670	3958	0	20908	1196	0	2762	0	0	280.45	15.2	2.54	0	0.0646	0.00982	0	1.77
I34A1	4788	818	41	0	818	41	0	0	0	0	399	68.2	3.42	0	0.234	0.00605	0	0	0	0	0	0	0	13	9	1	1	13	9	1	1	4536	743	41	0	743	41	0	0	0	0	412.36	67.5	3.73	0	0.228	0.0066	0	0
I96A0	4809	645	50	0	645	50	0	0	0	0	400.75	53.8	4.17	0	0.148	0.00734	0	0	0	0	0	0	0	11	6	1	1	11	6	1	1	4557	645	50	0	645	50	0	0	0	0	414.27	58.6	4.55	0	0.162	0.008	0	0
IBDVU	2040	394	0	0	394	0	0	0	0	0	680	131	0	0	0.343	0	0	0	0	0	0	0	NaN	6	3	0	0	6	3	0	0
IBVB	12752	710	0	0	710	0	0	0	0	0	1275.2	71	0	0	0.0821	0	0	0	0	0	0	0	NaN	11	3	0	0	11	3	0	0	8801	506	0	0	506	0	0	0	0	0	977.89	56.2	0	0	0.0855	0	0	0
ICHVA	33924	5807	740	0	5380	313	0	427	0	0	446.37	76.4	9.74	0	0.184	0.0118	0	5.62	0	0	0.0371	0	0.437	70	45	15	7	68	45	6	4	33696	5807	740	0	5380	313	0	427	0	0	449.28	77.4	9.87	0	0.186	0.0119	0	5.69
ICRSV	2599	505	0	0	505	0	0	0	0	0	433.17	84.2	0	0	0.221	0	0	0	0	0	0	0	NaN	6	4	0	0	6	4	0	0
IHNVW	3421	380	41	0	380	41	0	0	0	0	570.17	63.3	6.83	0	0.145	0.00344	0	0	0	0	0	0	0	8	4	1	1	8	4	1	1
IIV3	43365	7136	450	0	6776	90	0	360	0	0	344.17	56.6	3.57	0	0.173	0.0097	0	2.86	0	0	0.0355	0	0.67	90	61	11	7	89	60	2	2	43365	7136	450	0	6776	90	0	360	0	0	344.17	56.6	3.57	0	0.173	0.0097	0	2.86
IIV6	77551	13269	1605	0	11973	309	0	1296	0	0	165.71	28.4	3.43	0	0.106	0.0129	0	2.77	0	0	0.112	0	0.789	204	126	36	26	184	114	4	3	74706	12826	1270	0	11821	265	0	1005	0	0	164.19	28.2	2.79	0	0.106	0.0112	0	2.21
INBLE	4718	469	47	0	469	47	0	0	0	0	428.91	42.6	4.27	0	0.127	0.00732	0	0	0	0	0	0	0	9	6	1	1	9	6	1	1	4718	469	47	0	469	47	0	0	0	0	428.91	42.6	4.27	0	0.127	0.00732	0	0
INCAA	4259	708	76	0	684	52	0	24	0	0	532.38	88.5	9.5	0	0.227	0.0134	0	3	0	0	0.0385	0	0.316	14	8	2	2	13	8	1	1
IPNVJ	1965	405	36	0	369	0	0	36	0	0	655	135	12	0	0.268	0.0142	0	12	0	0	0.0702	0	1	6	3	1	1	7	3	0	0
ISAV8	4281	919	64	0	886	31	0	33	0	0	428.1	91.9	6.4	0	0.232	0.022	0	3.3	0	0	0.0196	0	0.5	19	8	2	2	19	8	1	1	4281	919	64	0	886	31	0	33	0	0	428.1	91.9	6.4	0	0.232	0.022	0	3.3
IXOSC	5815358	1574641	78365	3203	1505150	12077	0	66288	3203	0	284.05	76.9	3.83	0.156	0.277	0.00986	0.000264	3.24	0.156	0	0.0257	0.000556	0.762	17846	11528	1531	998	17639	11387	223	207	5020307	1496721	75285	2188	1430608	11360	0	63925	2188	0	299.36	89.2	4.49	0.13	0.314	0.0113	0.000259	3.81
JDNVP	1816	366	0	0	366	0	0	0	0	0	454	91.5	0	0	0.216	0	0	0	0	0	0	0	NaN	6	4	0	0	6	4	0	0
KORCO	475001	29252	4674	0	25799	1221	0	3453	0	0	296.5	18.3	2.92	0	0.0675	0.0114	0	2.16	0	0	0.0691	0	0.621	587	474	85	63	552	448	25	23	453960	27626	4201	0	24575	1150	0	3051	0	0	295.74	18	2.74	0	0.0662	0.00968	0	1.99
KORVE	1677413	161649	10022	0	154636	3009	0	7013	0	0	351.59	33.9	2.1	0	0.0991	0.00596	0	1.47	0	0	0.0298	0	0.618	2861	1898	231	190	2782	1870	67	66	1560627	151065	9803	0	144211	2949	0	6854	0	0	348.43	33.7	2.19	0	0.0996	0.00624	0	1.53
LACLA	656950	49948	7187	162	44805	2126	80	5061	82	0	295.26	22.4	3.23	0.0728	0.0741	0.0111	6.29e-05	2.27	0.0369	0	0.0758	0.00113	0.601	843	611	164	128	783	574	48	45	616564	47487	6857	162	42456	1908	80	4949	82	0	298.58	23	3.32	0.0785	0.0756	0.0109	6.78e-05	2.4
LACPL	934303	66492	5922	38	62073	1541	0	4381	38	0	302.56	21.5	1.92	0.0123	0.0647	0.0056	3.24e-05	1.42	0.0123	0	0.0478	0.00062	0.673	994	689	140	96	953	665	34	30	834847	61584	5635	38	57389	1478	0	4157	38	0	301.82	22.3	2.04	0.0137	0.0656	0.00595	3.62e-05	1.5
LAMBD	14272	2508	209	0	2330	31	0	178	0	0	216.24	38	3.17	0	0.149	0.00956	0	2.7	0	0	0.0584	0	0.8	36	25	6	5	37	24	1	1	14272	2508	209	0	2330	31	0	178	0	0	216.24	38	3.17	0	0.149	0.00956	0	2.7
LASSJ	3377	209	0	0	209	0	0	0	0	0	844.25	52.2	0	0	0.129	0	0	0	0	0	0	0	NaN	6	3	0	0	6	3	0	0
LATCH	12139710	3550529	389867	30392	3185776	55468	38	334399	30354	0	517.99	151	16.6	1.3	0.254	0.0273	0.00154	14.3	1.3	0	0.0635	0.0039	0.766	34589	15867	6416	3404	33680	15518	913	779	7006810	2247281	230333	16160	2030989	30171	30	200162	16130	0	562.93	181	18.5	1.3	0.284	0.0272	0.00148	16.1
LBVAV	3592	383	0	0	383	0	0	0	0	0	598.67	63.8	0	0	0.142	0	0	0	0	0	0	0	NaN	6	3	0	0	6	3	0	0
LCDV1	459	39	0	0	39	0	0	0	0	0	459	39	0	0	0.085	0	0	0	0	0	0	0	NaN	1	1	0	0	1	1	0	0
LDCPR	7701	617	73	0	617	73	0	0	0	0	770.1	61.7	7.3	0	0.11	0.00688	0	0	0	0	0	0	0	9	7	2	2	9	7	2	2	7701	617	73	0	617	73	0	0	0	0	770.1	61.7	7.3	0	0.11	0.00688	0	0
LEIBR	5087935	1835891	125861	0	1725223	15193	0	110668	0	0	627.99	227	15.5	0	0.311	0.0206	0	13.7	0	0	0.039	0	0.802	19129	6331	2224	979	18939	6277	234	199	4782972	1765768	115507	0	1664799	14538	0	100969	0	0	643.48	238	15.5	0	0.32	0.0209	0	13.6
LEIIN	5116889	1966566	127716	0	1852553	13703	0	114013	0	0	635.88	244	15.9	0	0.33	0.0211	0	14.2	0	0	0.0398	0	0.824	19598	6429	2222	1029	19495	6379	216	192	4896743	1931922	123360	0	1821993	13431	0	109929	0	0	647.8	256	16.3	0	0.341	0.0218	0	14.5
LEIMA	5145570	1958095	127785	0	1844755	14445	0	113340	0	0	639.92	244	15.9	0	0.324	0.0207	0	14.1	0	0	0.0387	0	0.813	19590	6414	2255	1014	19522	6364	227	194	4906956	1918329	124219	0	1808116	14006	0	110213	0	0	651.91	255	16.5	0	0.335	0.0216	0	14.6
LEPIN	1159747	102757	8810	0	97238	3291	0	5519	0	0	315.49	28	2.4	0	0.091	0.00715	0	1.5	0	0	0.0385	0	0.537	1865	1346	217	179	1789	1306	75	75	1086044	94890	7657	0	89628	2395	0	5262	0	0	315.16	27.5	2.22	0	0.0898	0.00617	0	1.53
LISMO	870843	62986	8767	0	57128	2909	0	5858	0	0	306.2	22.1	3.08	0	0.0726	0.0114	0	2.06	0	0	0.0646	0	0.555	1099	770	206	160	1034	739	67	64	811875	60271	8426	0	54548	2703	0	5723	0	0	306.14	22.7	3.18	0	0.0744	0.0117	0	2.16
LIYV9	6620	473	0	0	473	0	0	0	0	0	735.56	52.6	0	0	0.0627	0	0	0	0	0	0	0	NaN	8	4	0	0	8	4	0	0
LNYV3	3857	440	0	0	440	0	0	0	0	0	642.83	73.3	0	0	0.181	0	0	0	0	0	0	0	NaN	7	5	0	0	7	5	0	0
LOLV	2527	354	0	0	354	0	0	0	0	0	421.17	59	0	0	0.249	0	0	0	0	0	0	0	NaN	5	3	0	0	5	3	0	0
LOXAF	13857996	4581808	417107	38977	4184952	59225	2	357881	38974	0	541.01	179	16.3	1.52	0.291	0.0234	0.00161	14	1.52	0	0.049	0.00379	0.782	42150	17971	6707	3281	41504	17729	984	733	7265815	2655684	217763	17420	2449409	28907	1	188856	17419	0	557.19	204	16.7	1.34	0.332	0.024	0.00141	14.5
LRVLG	1687	60	0	0	60	0	0	0	0	0	562.33	20	0	0	0.027	0	0	0	0	0	0	0	NaN	1	1	0	0	1	1	0	0
LYCVA	3356	277	0	0	277	0	0	0	0	0	839	69.2	0	0	0.0611	0	0	0	0	0	0	0	NaN	5	2	0	0	5	2	0	0
MABVM	4873	913	60	0	888	35	0	25	0	0	696.14	130	8.57	0	0.222	0.0192	0	3.57	0	0	0.0162	0	0.417	8	5	2	2	8	5	1	1
MACMU	17042562	6041164	546556	55743	5515654	76699	81	469848	55653	0	479.56	170	15.4	1.57	0.319	0.0248	0.00185	13.2	1.57	0	0.0477	0.00373	0.793	56276	25974	8984	4344	55384	25607	1221	899	7751097	2954015	224670	22091	2736066	28767	36	195894	22046	0	523.12	199	15.2	1.49	0.352	0.0221	0.00173	13.2
MBVLF	1454	240	0	0	240	0	0	0	0	0	363.5	60	0	0	0.123	0	0	0	0	0	0	0	NaN	3	2	0	0	3	2	0	0
MCMVK	1769	304	0	0	304	0	0	0	0	0	442.25	76	0	0	0.252	0	0	0	0	0	0	0	NaN	6	4	0	0	6	4	0	0
MCV1	54465	10599	212	29	10422	64	0	148	29	0	334.14	65	1.3	0.178	0.196	0.00326	0.000326	0.908	0.178	0	0.00685	0.00208	0.6	123	87	5	5	125	87	2	2	54465	10599	212	29	10422	64	0	148	29	0	334.14	65	1.3	0.178	0.196	0.00326	0.000326	0.908
MDBVW	10188	1971	0	0	1971	0	0	0	0	0	192.23	37.2	0	0	0.147	0	0	0	0	0	0	0	NaN	21	13	0	0	21	13	0	0	6617	1170	0	0	1170	0	0	0	0	0	183.81	32.5	0	0	0.15	0	0	0
MEASC	5202	830	96	0	830	96	0	0	0	0	650.25	104	12	0	0.258	0.023	0	0	0	0	0	0	0	9	5	2	2	9	5	2	2
MELGA	8776990	2725710	285391	33291	2445968	38903	37	246488	33254	0	530.75	165	17.3	2.01	0.277	0.0273	0.00227	14.9	2.01	0	0.0581	0.00508	0.792	26139	11665	4562	2312	25498	11435	627	487	5855700	1923798	190021	16665	1742564	25425	27	164596	16638	0	552.69	182	17.9	1.57	0.292	0.0266	0.00164	15.5
MESFL	245043	20512	3111	0	18166	765	0	2346	0	0	358.77	30	4.55	0	0.0858	0.0129	0	3.43	0	0	0.0783	0	0.679	353	247	68	49	328	230	15	14	234038	19778	3047	0	17483	752	0	2295	0	0	354.6	30	4.62	0	0.0867	0.0128	0	3.48
METAC	1392324	119653	143	0	119569	59	0	84	0	0	311.62	26.8	0.032	0	0.0904	7.5e-05	0	0.0188	0	0	0.000374	0	0.389	2179	1543	3	3	2179	1543	1	1	1101961	98311	143	0	98227	59	0	84	0	0	305	27.2	0.0396	0	0.0958	9.27e-05	0	0.0232
METHJ	996237	59882	9322	0	53858	3298	0	6024	0	0	322.72	19.4	3.02	0	0.0588	0.00667	0	1.95	0	0	0.0685	0	0.559	1046	797	214	143	967	757	64	58	888965	52111	8447	0	46760	3096	0	5351	0	0	323.73	19	3.08	0	0.0578	0.0069	0	1.95
METJA	505150	27348	4934	0	23752	1338	0	3596	0	0	282.68	15.3	2.76	0	0.0627	0.0108	0	2.01	0	0	0.0781	0	0.63	554	455	110	84	498	419	29	29	480380	26416	4810	0	22857	1251	0	3559	0	0	284.92	15.7	2.85	0	0.064	0.0111	0	2.11
METKA	500958	68598	4212	0	65110	724	0	3488	0	0	296.95	40.7	2.5	0	0.143	0.00943	0	2.07	0	0	0.0335	0	0.748	1285	881	87	71	1244	854	18	16	479257	66221	4170	0	62775	724	0	3446	0	0	297.68	41.1	2.59	0	0.143	0.00954	0	2.14
METTH	524520	39938	3373	0	37685	1120	0	2253	0	0	280.64	21.4	1.8	0	0.0881	0.00787	0	1.21	0	0	0.0348	0	0.561	781	640	72	62	754	623	27	25	496438	37918	3373	0	35665	1120	0	2253	0	0	280	21.4	1.9	0	0.0885	0.0083	0	1.27
MILVL	3911	552	0	0	552	0	0	0	0	0	558.71	78.9	0	0	0.189	0	0	0	0	0	0	0	NaN	10	5	0	0	10	5	0	0
MIMIV	341649	51080	2130	3111	46318	465	14	1665	3097	0	375.85	56.2	2.34	3.42	0.142	0.00664	0.00279	1.83	3.41	0	0.0346	0.00936	0.752	581	382	50	45	551	374	7	7	319213	48432	1925	2750	44193	423	13	1502	2737	0	377.32	57.2	2.28	3.25	0.146	0.00641	0.00247	1.78
MLVMS	2941	790	50	0	790	50	0	0	0	0	980.33	263	16.7	0	0.317	0.0251	0	0	0	0	0	0	0	9	3	1	1	9	3	1	1
MMTVC	4213	1042	31	0	1042	31	0	0	0	0	842.6	208	6.2	0	0.259	0.00901	0	0	0	0	0	0	0	10	5	1	1	10	5	1	1
MMVR	3750	248	0	0	248	0	0	0	0	0	625	41.3	0	0	0.117	0	0	0	0	0	0	0	NaN	5	4	0	0	5	4	0	0
MNPVA	2426	645	0	0	645	0	0	0	0	0	404.33	108	0	0	0.196	0	0	0	0	0	0	0	NaN	5	3	0	0	5	3	0	0
MOKV	3604	438	0	0	438	0	0	0	0	0	720.8	87.6	0	0	0.172	0	0	0	0	0	0	0	NaN	8	5	0	0	8	5	0	0
MONBE	5511963	1523218	125772	2165	1410095	14805	9	110967	2156	0	599.91	166	13.7	0.236	0.275	0.0207	0.000137	12.1	0.235	0	0.0475	0.000227	0.804	15405	6668	2261	1233	15309	6596	248	226	5085434	1451777	119670	2165	1343316	13365	9	106305	2156	0	609.84	174	14.4	0.26	0.288	0.0216	0.000151	12.7
MONDO	11804469	3946020	327700	26162	3641289	49074	47	278616	26105	0	530.78	177	14.7	1.18	0.3	0.0235	0.00136	12.5	1.17	0	0.0485	0.00319	0.79	37489	16079	5657	2928	36788	15863	799	615	7627795	2849695	222129	18137	2640201	30730	32	191389	18095	0	577.56	216	16.8	1.37	0.344	0.0232	0.00157	14.5
MOOTA	751866	44378	7628	0	39280	2530	0	5098	0	0	306.76	18.1	3.11	0	0.0615	0.00941	0	2.08	0	0	0.0642	0	0.531	810	618	168	121	748	589	52	49	701521	41916	7405	0	36966	2455	0	4950	0	0	307.41	18.4	3.24	0	0.0622	0.00977	0	2.17
MOUSE	19604607	6945073	596194	38892	6388487	78488	9	517703	38880	0	452.93	160	13.8	0.899	0.32	0.0225	0.00116	12	0.898	0	0.0461	0.00274	0.791	63904	29324	9879	5013	63149	28903	1251	987	8307074	3211767	240435	18481	2983515	30659	5	209776	18476	0	524.57	203	15.2	1.17	0.353	0.021	0.00119	13.2
MPRVN	8005	1068	37	0	1068	37	0	0	0	0	727.73	97.1	3.36	0	0.145	0.00177	0	0	0	0	0	0	0	19	9	1	1	19	9	1	1	8005	1068	37	0	1068	37	0	0	0	0	727.73	97.1	3.36	0	0.145	0.00177	0	0
MRFVC	2446	832	0	0	832	0	0	0	0	0	1223	416	0	0	0.602	0	0	0	0	0	0	0	NaN	4	2	0	0	4	2	0	0
MSVS	972	199	0	0	199	0	0	0	0	0	243	49.8	0	0	0.17	0	0	0	0	0	0	0	NaN	5	3	0	0	5	3	0	0
MUHVS	10487	2410	0	0	2410	0	0	0	0	0	699.13	161	0	0	0.211	0	0	0	0	0	0	0	NaN	22	12	0	0	22	12	0	0	10487	2410	0	0	2410	0	0	0	0	0	699.13	161	0	0	0.211	0	0	0
MUMIP	2754	565	0	0	565	0	0	0	0	0	393.43	80.7	0	0	0.116	0	0	0	0	0	0	0	NaN	9	4	0	0	9	4	0	0
MUMPM	4977	591	31	0	591	31	0	0	0	0	622.12	73.9	3.88	0	0.172	0.0072	0	0	0	0	0	0	0	10	5	1	1	10	5	1	1
MYCMS	319461	32867	4745	0	29111	989	0	3756	0	0	326.65	33.6	4.85	0	0.113	0.0173	0	3.84	0	0	0.0901	0	0.772	514	351	102	77	473	324	19	18	262899	26175	4241	0	22880	946	0	3295	0	0	323.77	32.2	5.22	0	0.109	0.0184	0	4.06
MYCPN	239753	34098	6280	0	29060	1242	0	5038	0	0	348.99	49.6	9.14	0	0.139	0.0263	0	7.33	0	0	0.125	0	0.719	466	286	111	75	412	254	22	20	200857	22492	4653	0	18920	1081	0	3572	0	0	355.5	39.8	8.24	0	0.104	0.016	0	6.32
MYCS2	2082061	210914	6692	96	205965	1839	0	4853	96	0	315.42	32	1.01	0.0145	0.119	0.00342	3.9e-05	0.735	0.0145	0	0.0141	0.000185	0.682	3764	2767	171	137	3715	2743	41	38	1818452	193176	5982	96	188844	1746	0	4236	96	0	311.11	33	1.02	0.0164	0.126	0.00343	4.41e-05	0.725
MYCTU	1329959	181886	4378	65	178907	1464	0	2914	65	0	333.99	45.7	1.1	0.0163	0.135	0.00337	8.41e-05	0.732	0.0163	0	0.0131	0.000254	0.598	2550	1795	111	84	2523	1781	30	30	1174312	159034	3952	65	156310	1293	0	2659	65	0	329.31	44.6	1.11	0.0182	0.135	0.00351	9.39e-05	0.746
MYOLU	10579155	3622182	307395	29972	3329910	45064	4	262304	29941	0	512.31	175	14.9	1.45	0.302	0.0224	0.00179	12.7	1.45	0	0.0449	0.00413	0.774	33711	14981	5123	2545	33254	14797	728	577	7089194	2658039	214305	16547	2454557	27369	1	186936	16546	0	571.06	214	17.3	1.33	0.34	0.0242	0.00146	15.1
MYRV9	7268	537	0	0	537	0	0	0	0	0	660.73	48.8	0	0	0.0931	0	0	0	0	0	0	0	NaN	10	8	0	0	10	8	0	0	7268	537	0	0	537	0	0	0	0	0	660.73	48.8	0	0	0.0931	0	0	0
MYXVL	48407	2784	32	0	2784	32	0	0	0	0	306.37	17.6	0.203	0	0.0775	0.000101	0	0	0	0	0	0	0	46	38	1	1	46	38	1	1	47898	2784	32	0	2784	32	0	0	0	0	305.08	17.7	0.204	0	0.078	0.000102	0	0
NANEQ	151454	7715	2506	0	6095	886	0	1620	0	0	282.56	14.4	4.68	0	0.0633	0.0221	0	3.02	0	0	0.149	0	0.592	147	117	57	43	124	102	19	18	151100	7715	2506	0	6095	886	0	1620	0	0	282.43	14.4	4.68	0	0.0634	0.0222	0	3.03
NCBVS	2537	758	0	0	758	0	0	0	0	0	1268.5	379	0	0	0.267	0	0	0	0	0	0	0	NaN	7	2	0	0	7	2	0	0
NDVB1	5000	725	69	0	725	69	0	0	0	0	625	90.6	8.62	0	0.304	0.0156	0	0	0	0	0	0	0	7	5	2	1	7	5	2	1
NECH7	7536017	1807243	69884	102	1747850	10593	0	59291	102	0	479.73	115	4.45	0.00649	0.223	0.00833	8.56e-06	3.77	0.00649	0	0.0202	2.34e-05	0.782	20006	10510	1467	1033	19959	10460	193	179	6317695	1707022	67985	102	1648907	9972	0	58013	102	0	491.65	133	5.29	0.00794	0.255	0.00981	1.05e-05	4.51
NEIG1	555344	46851	4902	0	43561	1612	0	3290	0	0	282.91	23.9	2.5	0	0.0962	0.00827	0	1.68	0	0	0.0396	0	0.566	825	619	116	91	802	606	38	37	534930	43231	4618	0	40116	1503	0	3115	0	0	286.21	23.1	2.47	0	0.0917	0.00806	0	1.67
NEIMB	583208	47849	5315	0	43951	1417	0	3898	0	0	291.46	23.9	2.66	0	0.0844	0.00908	0	1.95	0	0	0.0511	0	0.613	822	581	115	90	784	559	31	30	551673	43522	5246	0	39663	1387	0	3859	0	0	291.12	23	2.77	0	0.0835	0.00953	0	2.04
NEMVE	8260405	1976572	134766	11668	1850323	20050	135	114716	11533	0	338.06	80.9	5.52	0.478	0.241	0.0142	0.0017	4.69	0.472	0	0.0411	0.00449	0.791	21300	12849	2677	1632	20858	12577	335	292	6292276	1642611	118470	7685	1533305	16714	135	101756	7550	0	392.9	103	7.4	0.48	0.266	0.0176	0.00136	6.35
NEUCR	4782371	1842183	79281	42	1771893	9033	0	70248	42	0	486.01	187	8.06	0.00427	0.366	0.0125	2.44e-05	7.14	0.00427	0	0.0227	6.51e-05	0.828	17077	7969	1463	943	17110	7931	143	130	4641716	1824962	78842	42	1754969	8891	0	69951	42	0	488.5	192	8.3	0.00442	0.374	0.0129	2.53e-05	7.36
NITMS	493620	57624	6295	192	52085	948	0	5347	192	0	275	32.1	3.51	0.107	0.121	0.0123	0.000192	2.98	0.107	0	0.0572	0.000781	0.731	991	717	128	96	952	689	18	18	467872	54984	6257	192	49476	941	0	5316	192	0	276.36	32.5	3.7	0.113	0.122	0.0129	0.000203	3.14
NODAM	1579	292	31	0	275	14	0	17	0	0	526.33	97.3	10.3	0	0.239	0.0754	0	5.67	0	0	0.116	0	0.548	3	3	1	1	3	3	0	0
NOMLE	10695254	3812765	312275	24900	3519739	44130	19	268145	24881	0	541.97	193	15.8	1.26	0.329	0.0229	0.00129	13.6	1.26	0	0.043	0.00292	0.786	35580	15293	5120	2548	35038	15129	712	545	7604878	2890010	218471	16076	2682844	27364	17	191107	16059	0	555.79	211	16	1.17	0.353	0.0221	0.0012	14
NPVR1	41291	4205	878	0	3723	396	0	482	0	0	277.12	28.2	5.89	0	0.106	0.0179	0	3.23	0	0	0.0548	0	0.348	67	50	18	12	61	48	10	9	41291	4205	878	0	3723	396	0	482	0	0	277.12	28.2	5.89	0	0.106	0.0179	0	3.23
NVN68	2531	616	0	0	616	0	0	0	0	0	843.67	205	0	0	0.251	0	0	0	0	0	0	0	NaN	7	3	0	0	7	3	0	0
OCSVU	1280	169	0	0	169	0	0	0	0	0	426.67	56.3	0	0	0.0877	0	0	0	0	0	0	0	NaN	4	2	0	0	4	2	0	0
OLV2I	2214	395	0	0	395	0	0	0	0	0	553.5	98.8	0	0	0.21	0	0	0	0	0	0	0	NaN	9	4	0	0	9	4	0	0
ORENI	15900418	5205293	515989	51718	4693405	55782	37	460207	51681	0	594.34	195	19.3	1.93	0.288	0.0265	0.00178	17.2	1.93	0	0.0548	0.00388	0.809	48696	20474	8208	4084	48137	20177	875	753	7493685	2672786	247040	18969	2432728	25926	25	221114	18944	0	603.31	215	19.9	1.53	0.318	0.0271	0.00155	17.8
ORNAN	9152217	2989342	265166	26991	2739366	42120	54	223039	26930	0	388.61	127	11.3	1.15	0.291	0.0232	0.00217	9.47	1.14	0	0.0473	0.00463	0.774	29195	15076	4409	2318	28548	14791	698	534	6249680	2298200	180213	15077	2127734	24793	24	155413	15046	0	418.94	154	12.1	1.01	0.342	0.0235	0.00197	10.4
ORYLA	11965754	3557332	353542	35462	3213963	45628	7	307914	35455	0	485.78	144	14.4	1.44	0.279	0.0243	0.00157	12.5	1.44	0	0.0516	0.00364	0.784	36838	17507	5682	3088	36168	17221	749	645	6502981	2179718	193758	19301	1989595	22933	3	170825	19298	0	516.07	173	15.4	1.53	0.318	0.0247	0.00157	13.6
ORYSJ	22210771	7078194	269661	0	6852953	44420	0	225241	0	0	351.24	112	4.26	0	0.382	0.00871	0	3.56	0	0	0.018	0	0.773	80954	47956	5657	3828	80348	47724	653	611	9965626	3956987	108507	0	3866786	18306	0	90201	0	0	296.08	118	3.22	0	0.464	0.00692	0	2.68
OSHVF	51428	8801	541	0	8444	184	0	357	0	0	443.34	75.9	4.66	0	0.176	0.00815	0	3.08	0	0	0.0283	0	0.565	121	67	12	9	120	67	4	4	50934	8715	541	0	8358	184	0	357	0	0	442.9	75.8	4.7	0	0.176	0.00822	0	3.1
OTOGA	10768581	3645644	304224	28312	3359974	46850	16	257374	28296	0	540.32	183	15.3	1.42	0.304	0.0225	0.00141	12.9	1.42	0	0.0447	0.00331	0.775	34121	14709	5039	2515	33629	14534	769	583	7475772	2787870	218708	18398	2578923	28143	16	190565	18382	0	581.77	217	17	1.43	0.338	0.0234	0.00138	14.8
OUMVV	1358	213	0	0	213	0	0	0	0	0	452.67	71	0	0	0.15	0	0	0	0	0	0	0	NaN	3	2	0	0	3	2	0	0
PANTR	10627310	3768222	314858	28217	3472515	47344	24	267514	28193	0	528.01	187	15.6	1.4	0.327	0.0229	0.00137	13.3	1.4	0	0.0433	0.00324	0.782	34844	15311	5143	2527	34335	15136	776	574	7551631	2887989	226143	19464	2671235	28830	23	197313	19441	0	556.13	213	16.7	1.43	0.353	0.0226	0.00135	14.5
PAPVE	2914	836	0	0	836	0	0	0	0	0	194.27	55.7	0	0	0.291	0	0	0	0	0	0	0	NaN	13	8	0	0	13	8	0	0	2914	836	0	0	836	0	0	0	0	0	194.27	55.7	0	0	0.291	0	0	0
PARTE	18009409	4790606	913565	56	3992128	115143	0	798422	56	0	456.39	121	23.2	0.00142	0.293	0.0465	7.54e-07	20.2	0.00142	0	0.0964	7.04e-06	0.8	51799	28323	15939	8147	50028	27522	1882	1642	8826571	2325025	471269	0	1908474	54718	0	416551	0	0	465.46	123	24.9	0	0.285	0.046	0	22
PAVBP	1612	463	0	0	463	0	0	0	0	0	537.33	154	0	0	0.314	0	0	0	0	0	0	0	NaN	4	3	0	0	4	3	0	0
PBCV1	136702	21325	1222	59	20250	206	0	1016	59	0	172.39	26.9	1.54	0.0744	0.137	0.00755	0.00031	1.28	0.0744	0	0.0402	0.00206	0.765	293	231	29	23	287	224	3	3	129301	20091	1222	59	19016	206	0	1016	59	0	169.69	26.4	1.6	0.0774	0.137	0.00786	0.000323	1.33
PCV1C	542	62	0	0	62	0	0	0	0	0	271	31	0	0	0.118	0	0	0	0	0	0	0	NaN	2	2	0	0	2	2	0	0
PCV87	3091	483	154	0	354	25	0	129	0	0	441.57	69	22	0	0.178	0.0844	0	18.4	0	0	0.359	0	0.898	6	4	3	2	4	2	0	0
PCVC	3858	528	0	0	528	0	0	0	0	0	964.5	132	0	0	0.136	0	0	0	0	0	0	0	NaN	7	4	0	0	7	4	0	0
PEDHC	5535367	1821820	124981	6010	1709193	18361	3	106620	6007	0	514.3	169	11.6	0.558	0.291	0.0183	0.000409	9.91	0.558	0	0.0401	0.000694	0.779	16388	7429	2291	1182	16142	7335	298	247	5226574	1780917	121420	4741	1672302	17543	3	103877	4738	0	526.5	179	12.2	0.478	0.303	0.019	0.000303	10.5
PEMVW	2926	860	0	0	860	0	0	0	0	0	585.2	172	0	0	0.284	0	0	0	0	0	0	0	NaN	12	5	0	0	12	5	0	0
PHANO	6076935	1764528	79663	76	1694911	10122	0	69541	76	0	379.86	110	4.98	0.00475	0.284	0.0093	7.12e-06	4.35	0.00475	0	0.0219	7.09e-05	0.814	19295	10677	1563	1045	19253	10611	170	160	5779932	1740655	79014	76	1671533	9968	0	69046	76	0	379.48	114	5.19	0.00499	0.294	0.00968	7.47e-06	4.53
PHATC	4838670	1202266	51478	25	1159496	8733	0	42745	25	0	462.37	115	4.92	0.00239	0.23	0.0099	5.29e-06	4.08	0.00239	0	0.0232	2.74e-05	0.76	14666	7129	1076	723	14588	7082	157	146	4278968	1112770	49428	25	1071432	8115	0	41313	25	0	469.44	122	5.42	0.00274	0.242	0.0109	6.07e-06	4.53
PHYIT	7440308	1870520	157226	54	1735310	22070	0	135156	54	0	422.53	106	8.93	0.00307	0.254	0.0174	3.38e-06	7.68	0.00307	0	0.0418	1.66e-05	0.791	22490	11708	3149	1795	22193	11573	369	343	5680129	1582494	140208	54	1460904	18672	0	121536	54	0	465.62	130	11.5	0.00443	0.286	0.0212	4.88e-06	9.96
PHYPA	12696586	3344966	207197	0	3186968	49199	0	157998	0	0	364.46	96	5.95	0	0.255	0.015	0	4.54	0	0	0.0351	0	0.712	43566	23605	4602	3204	42677	23257	767	695	6713683	1860344	85516	0	1792713	17885	0	67631	0	0	368.24	102	4.69	0	0.266	0.00877	0	3.71
PIG	11789359	4050746	343655	29609	3724314	46808	18	296841	29585	0	452.24	155	13.2	1.14	0.298	0.0225	0.00156	11.4	1.13	0	0.0467	0.00359	0.789	37495	17636	5631	2880	36905	17341	745	586	6886409	2625442	204111	17134	2430462	26241	18	177864	17110	0	500.54	191	14.8	1.25	0.343	0.0239	0.00157	12.9
PLABA	2837789	845371	38726	0	812126	5481	0	33245	0	0	243.46	72.5	3.32	0	0.199	0.00888	0	2.85	0	0	0.0305	0	0.802	9371	5148	804	536	9252	5080	109	98	2520605	759506	32635	0	731782	4911	0	27724	0	0	251.68	75.8	3.26	0	0.193	0.00797	0	2.77
PLACH	2835222	832491	33062	0	804592	5163	0	27899	0	0	194.01	57	2.26	0	0.2	0.00805	0	1.91	0	0	0.0285	0	0.801	9541	6015	749	567	9424	5933	98	94	2416307	725270	28983	0	700575	4288	0	24695	0	0	202.25	60.7	2.43	0	0.195	0.00783	0	2.07
PLAF7	4074762	1719101	58208	131	1667757	6995	0	51213	131	0	765.21	323	10.9	0.0246	0.331	0.0141	1.71e-05	9.62	0.0246	0	0.0296	5.74e-05	0.845	14829	4263	1233	721	14880	4229	127	109	3826129	1622108	56134	131	1572393	6550	0	49584	131	0	779.25	330	11.4	0.0267	0.336	0.0148	1.85e-05	10.1
PLAKH	3704850	1410945	53290	245	1365435	8025	0	45265	245	0	726.44	277	10.4	0.048	0.318	0.0146	3.38e-05	8.88	0.048	0	0.0295	8.33e-05	0.789	14123	4107	1093	629	14028	4078	136	128	3537186	1339516	51661	245	1295499	7889	0	43772	245	0	735.53	279	10.7	0.0509	0.313	0.0149	3.58e-05	9.1
PLAVS	3748164	1534769	64712	463	1478225	8631	0	56081	463	0	695.52	285	12	0.0859	0.337	0.0162	9.35e-05	10.4	0.0859	0	0.0314	0.000232	0.797	13999	4368	1249	669	13954	4329	155	136	3638461	1501501	61667	380	1447921	8467	0	53200	380	0	717.65	296	12.2	0.075	0.341	0.0164	8.5e-05	10.5
PLAYO	3387422	1252217	47268	946	1209808	5805	0	41463	946	0	436.69	161	6.09	0.122	0.267	0.00952	0.000222	5.35	0.122	0	0.0252	0.000625	0.832	12162	4965	1004	603	12138	4916	104	93	2974340	1152705	41356	946	1115623	5220	0	36136	946	0	480.66	186	6.68	0.153	0.289	0.0106	0.000278	5.84
PLRV1	3639	1245	0	0	1245	0	0	0	0	0	404.33	138	0	0	0.406	0	0	0	0	0	0	0	NaN	13	7	0	0	13	7	0	0
PMTVS	3653	561	0	0	561	0	0	0	0	0	521.86	80.1	0	0	0.12	0	0	0	0	0	0	0	NaN	8	4	0	0	8	4	0	0
PMVK	1498	254	0	0	254	0	0	0	0	0	299.6	50.8	0	0	0.319	0	0	0	0	0	0	0	NaN	5	4	0	0	5	4	0	0
PNLV	2331	579	0	0	579	0	0	0	0	0	582.75	145	0	0	0.213	0	0	0	0	0	0	0	NaN	9	3	0	0	9	3	0	0
POL1M	2209	99	0	0	99	0	0	0	0	0	2209	99	0	0	0.0448	0	0	0	0	0	0	0	NaN	2	1	0	0	2	1	0	0
POLPA	6385196	1742553	102380	0	1652035	11862	0	90518	0	0	516.98	141	8.29	0	0.258	0.0138	0	7.33	0	0	0.0339	0	0.823	16664	8262	1909	1272	16682	8178	199	188	5399036	1619056	97226	0	1532806	10976	0	86250	0	0	536.04	161	9.65	0	0.282	0.0155	0	8.56
POLVP	1483	134	0	0	134	0	0	0	0	0	370.75	33.5	0	0	0.169	0	0	0	0	0	0	0	NaN	2	2	0	0	2	2	0	0
PONAB	11454238	4014913	333934	30273	3697957	47214	30	286713	30236	0	502.71	176	14.7	1.33	0.322	0.0225	0.00135	12.6	1.33	0	0.0434	0.00294	0.786	37497	16982	5539	2776	36979	16774	768	600	7618522	2901848	225575	18958	2685836	28491	30	197084	18928	0	527.82	201	15.6	1.31	0.352	0.0219	0.00135	13.7
POPTR	14155519	3224370	189341	0	3071821	36792	0	152549	0	0	338.7	77.1	4.53	0	0.229	0.0121	0	3.65	0	0	0.0318	0	0.737	40527	24346	3838	2699	39789	23986	641	599	6279718	1722496	96664	0	1643410	17578	0	79086	0	0	345.5	94.8	5.32	0	0.271	0.0126	0	4.35
PRIPA	8406767	2515983	157936	22949	2353331	18218	13	139716	22934	0	289.1	86.5	5.43	0.789	0.273	0.0138	0.00226	4.8	0.789	0	0.0344	0.00514	0.828	26931	16700	3058	1970	26838	16436	327	295	6757714	2222669	138638	10386	2089124	15465	12	123171	10372	0	304.24	100	6.24	0.468	0.302	0.0155	0.00117	5.55
PROMA	516670	43825	2919	0	41622	716	0	2203	0	0	274.68	23.3	1.55	0	0.0981	0.00706	0	1.17	0	0	0.0338	0	0.689	815	624	70	59	793	606	16	16	500625	41799	2672	0	39805	678	0	1994	0	0	276.13	23.1	1.47	0	0.0966	0.00685	0	1.1
PSEAE	1857270	189701	15022	0	178149	3470	0	11552	0	0	333.86	34.1	2.7	0	0.105	0.00792	0	2.08	0	0	0.042	0	0.694	3358	2247	352	271	3255	2189	65	62	1662340	174204	14016	0	163333	3145	0	10871	0	0	329.96	34.6	2.78	0	0.109	0.00816	0	2.16
PSHV1	39982	9667	279	0	9492	104	0	175	0	0	563.13	136	3.93	0	0.224	0.00333	0	2.46	0	0	0.0117	0	0.577	111	55	7	5	108	55	2	2	39982	9667	279	0	9492	104	0	175	0	0	563.13	136	3.93	0	0.224	0.00333	0	2.46
PUCGT	6249486	2414480	72575	359	2351130	9580	4	62995	355	0	395.34	153	4.59	0.0227	0.368	0.00933	4.72e-05	3.99	0.0225	0	0.018	8.73e-05	0.814	24097	12449	1500	1093	24126	12383	162	154	4371559	1827820	56219	184	1778715	7294	4	48925	180	0	419.82	176	5.4	0.0177	0.394	0.00999	3.4e-05	4.7
PVCV1	2179	666	39	0	664	37	0	2	0	0	2179	666	39	0	0.306	0.0179	0	2	0	0	0.003	0	0.0513	7	1	1	1	7	1	1	1
PVMR	2781	114	0	0	114	0	0	0	0	0	463.5	19	0	0	0.0625	0	0	0	0	0	0	0	NaN	1	1	0	0	1	1	0	0
PVXX3	2104	216	0	0	216	0	0	0	0	0	420.8	43.2	0	0	0.0551	0	0	0	0	0	0	0	NaN	3	2	0	0	3	2	0	0
PVYN	4049	292	0	0	292	0	0	0	0	0	2024.5	146	0	0	0.0728	0	0	0	0	0	0	0	NaN	5	2	0	0	5	2	0	0
PYFV1	3027	181	0	0	181	0	0	0	0	0	3027	181	0	0	0.0598	0	0	0	0	0	0	0	NaN	4	1	0	0	4	1	0	0
PYRAE	654950	21498	5333	0	18178	2013	0	3320	0	0	252.88	8.3	2.06	0	0.0423	0.00837	0	1.28	0	0	0.103	0	0.525	426	384	104	82	373	341	43	39	599025	19664	4741	0	16677	1754	0	2987	0	0	254.9	8.37	2.02	0	0.0427	0.00803	0	1.27
PYRFU	577532	25486	5028	0	22018	1560	0	3468	0	0	282.41	12.5	2.46	0	0.051	0.00798	0	1.7	0	0	0.0659	0	0.505	516	435	110	85	477	412	39	39	536326	23943	4968	0	20505	1530	0	3438	0	0	284.22	12.7	2.63	0	0.0516	0.0084	0	1.82
PYRKO	637680	35866	7409	0	30280	1823	0	5586	0	0	277.13	15.6	3.22	0	0.0673	0.0119	0	2.43	0	0	0.0935	0	0.667	688	564	147	106	613	518	33	31	600525	34116	6915	0	28904	1703	0	5212	0	0	277.25	15.8	3.19	0	0.0681	0.0122	0	2.41
PZSVT	2166	224	0	0	224	0	0	0	0	0	541.5	56	0	0	0.168	0	0	0	0	0	0	0	NaN	4	3	0	0	4	3	0	0
RABIT	13188114	4442960	380440	35112	4080864	53432	24	327008	35088	0	540.7	182	15.6	1.44	0.304	0.023	0.00155	13.4	1.44	0	0.0452	0.00348	0.782	41026	17818	6061	3033	40460	17616	864	672	7071488	2655349	208741	17279	2455941	26595	17	182146	17262	0	562.88	211	16.6	1.38	0.346	0.0237	0.0016	14.5
RABVP	3615	377	0	0	377	0	0	0	0	0	723	75.4	0	0	0.176	0	0	0	0	0	0	0	NaN	8	5	0	0	8	5	0	0
RAT	14445264	4829500	411347	29875	4444059	55750	28	355594	29844	0	528.11	177	15	1.09	0.297	0.0224	0.00131	13	1.09	0	0.045	0.00314	0.79	43958	19400	6714	3359	43502	19179	888	704	7732932	2930331	224186	15636	2719084	28555	19	195630	15616	0	553.34	210	16	1.12	0.346	0.0233	0.00118	14
RBDVR	2326	338	0	0	338	0	0	0	0	0	775.33	113	0	0	0.267	0	0	0	0	0	0	0	NaN	6	3	0	0	6	3	0	0
RCNMV	1423	202	0	0	202	0	0	0	0	0	474.33	67.3	0	0	0.176	0	0	0	0	0	0	0	NaN	3	3	0	0	3	3	0	0
RDVF	7840	845	30	0	845	30	0	0	0	0	603.08	65	2.31	0	0.163	0.00207	0	0	0	0	0	0	0	14	9	1	1	14	9	1	1	7840	845	30	0	845	30	0	0	0	0	603.08	65	2.31	0	0.163	0.00207	0	0
REOVL	7734	834	226	0	696	88	0	138	0	0	703.09	75.8	20.5	0	0.124	0.0372	0	12.5	0	0	0.154	0	0.6	14	7	4	2	11	6	2	2	7734	834	226	0	696	88	0	138	0	0	703.09	75.8	20.5	0	0.124	0.0372	0	12.5
RFVKA	46875	2376	65	0	2341	30	0	35	0	0	306.37	15.5	0.425	0	0.0716	0.0016	0	0.229	0	0	0.00766	0	0.5	44	36	2	2	44	36	1	1	45924	2376	65	0	2341	30	0	35	0	0	304.13	15.7	0.43	0	0.0726	0.00162	0	0.232
RGDV	7782	877	33	0	877	33	0	0	0	0	648.5	73.1	2.75	0	0.167	0.0024	0	0	0	0	0	0	0	12	7	1	1	12	7	1	1	7782	877	33	0	877	33	0	0	0	0	648.5	73.1	2.75	0	0.167	0.0024	0	0
RGMVD	3086	370	0	0	370	0	0	0	0	0	3086	370	0	0	0.12	0	0	0	0	0	0	0	NaN	6	1	0	0	6	1	0	0
RHDVF	2461	183	0	0	183	0	0	0	0	0	1230.5	91.5	0	0	0.039	0	0	0	0	0	0	0	NaN	4	1	0	0	4	1	0	0
RHIO9	5839211	1377606	116570	0	1280751	19715	0	96855	0	0	344.13	81.2	6.87	0	0.235	0.0171	0	5.71	0	0	0.047	0	0.782	16870	9995	2332	1642	16583	9804	369	303	3343663	881182	76397	0	817092	12307	0	64090	0	0	346.92	91.4	7.93	0	0.261	0.0183	0	6.65
RHOBA	2290149	389712	17258	0	376604	4150	0	13108	0	0	314.97	53.6	2.37	0	0.207	0.0053	0	1.8	0	0	0.0191	0	0.673	6588	4095	398	286	6493	4057	86	82	2168650	372162	16688	0	359461	3987	0	12701	0	0	315.58	54.2	2.43	0	0.207	0.00534	0	1.85
RHORT	1292602	142321	9121	0	135877	2677	0	6444	0	0	337.05	37.1	2.38	0	0.116	0.00642	0	1.68	0	0	0.0268	0	0.649	2472	1675	225	160	2415	1657	55	52	1212185	134953	8377	0	129205	2629	0	5748	0	0	337.47	37.6	2.33	0	0.117	0.00646	0	1.6
RHOS4	1334414	173178	8616	0	166409	1847	0	6769	0	0	314.72	40.8	2.03	0	0.137	0.00652	0	1.6	0	0	0.0263	0	0.742	2906	1957	200	149	2859	1926	35	30	1240356	162483	7866	0	156283	1666	0	6200	0	0	315.85	41.4	2	0	0.138	0.00637	0	1.58
RICPR	279199	14166	1702	0	13317	853	0	849	0	0	334.77	17	2.04	0	0.0578	0.00732	0	1.02	0	0	0.0553	0	0.453	255	181	41	37	242	172	20	19	277100	14166	1702	0	13317	853	0	849	0	0	335.07	17.1	2.06	0	0.0583	0.00738	0	1.03
ROTHC	5608	333	98	0	277	42	0	56	0	0	509.82	30.3	8.91	0	0.115	0.0323	0	5.09	0	0	0.154	0	0.545	5	5	3	3	5	5	1	1	5608	333	98	0	277	42	0	56	0	0	509.82	30.3	8.91	0	0.115	0.0323	0	5.09
ROTJ1	5679	559	80	0	494	15	0	65	0	0	516.27	50.8	7.27	0	0.145	0.0328	0	5.91	0	0	0.105	0	0.783	10	6	2	2	9	6	0	0	5679	559	80	0	494	15	0	65	0	0	516.27	50.8	7.27	0	0.145	0.0328	0	5.91
ROTSH	5897	645	168	0	593	116	0	52	0	0	491.42	53.8	14	0	0.164	0.0497	0	4.33	0	0	0.101	0	0.307	8	7	4	3	7	7	2	2	5897	645	168	0	593	116	0	52	0	0	491.42	53.8	14	0	0.164	0.0497	0	4.33
RRSVT	8422	829	32	0	829	32	0	0	0	0	765.64	75.4	2.91	0	0.127	0.00235	0	0	0	0	0	0	0	14	7	1	1	14	7	1	1	8422	829	32	0	829	32	0	0	0	0	765.64	75.4	2.91	0	0.127	0.00235	0	0
RSVSA	3033	692	0	0	692	0	0	0	0	0	758.25	173	0	0	0.28	0	0	0	0	0	0	0	NaN	10	4	0	0	10	4	0	0
RSVT	4949	366	0	0	366	0	0	0	0	0	707	52.3	0	0	0.111	0	0	0	0	0	0	0	NaN	8	4	0	0	8	4	0	0
RTBVP	2373	569	202	0	442	75	0	127	0	0	593.25	142	50.5	0	0.333	0.134	0	31.8	0	0	0.206	0	0.546	8	3	5	3	7	3	1	1
RTSVA	3473	512	72	0	468	28	0	44	0	0	3473	512	72	0	0.147	0.0207	0	44	0	0	0.0859	0	0.611	9	1	1	1	8	1	0	0
RUBVT	3179	734	0	0	734	0	0	0	0	0	1589.5	367	0	0	0.244	0	0	0	0	0	0	0	NaN	10	2	0	0	10	2	0	0
RVFVZ	3856	341	0	0	341	0	0	0	0	0	964	85.2	0	0	0.0983	0	0	0	0	0	0	0	NaN	8	3	0	0	8	3	0	0
SALRD	1007991	216576	12134	0	205686	1244	0	10890	0	0	358.46	77	4.32	0	0.218	0.0103	0	3.87	0	0	0.0269	0	0.827	3484	1931	260	164	3434	1914	22	22	960255	206413	10526	0	197037	1150	0	9376	0	0	360.46	77.5	3.95	0	0.218	0.00974	0	3.52
SALTY	1420651	82957	10837	0	75345	3225	0	7612	0	0	313.4	18.3	2.39	0	0.0627	0.00812	0	1.68	0	0	0.0603	0	0.614	1466	1081	254	192	1388	1031	71	67	1295415	74812	9818	0	68075	3081	0	6737	0	0	311.4	18	2.36	0	0.0623	0.00825	0	1.62
SARHA	11957955	4044641	363272	34185	3701101	53881	28	309383	34149	0	534.12	181	16.2	1.53	0.302	0.0244	0.00171	13.8	1.53	0	0.0502	0.00383	0.781	37004	16038	6033	2979	36356	15798	875	649	7118626	2600515	212029	16044	2400570	28105	15	183916	16021	0	541.92	198	16.1	1.22	0.339	0.0238	0.00143	14
SBMVA	1951	298	0	0	298	0	0	0	0	0	487.75	74.5	0	0	0.155	0	0	0	0	0	0	0	NaN	3	3	0	0	3	3	0	0
SBWMN	3259	486	94	0	456	64	0	30	0	0	651.8	97.2	18.8	0	0.168	0.0607	0	6	0	0	0.0641	0	0.333	9	4	3	3	9	4	2	2
SCHMA	5593996	1808651	111701	8032	1709420	20497	5	91204	8027	0	477.67	154	9.54	0.686	0.267	0.0156	0.000494	7.79	0.685	0	0.0353	0.000959	0.721	19230	7539	1919	998	18882	7449	335	278	4849192	1598242	91168	6892	1518020	17837	1	73331	6891	0	507.24	167	9.54	0.721	0.275	0.0143	0.000481	7.67
SCHPO	2363896	557978	39390	0	525649	7061	0	32329	0	0	464.42	110	7.74	0	0.23	0.016	0	6.35	0	0	0.0401	0	0.748	5964	3332	786	509	5823	3278	129	119	2202942	536414	38713	0	504626	6925	0	31788	0	0	467.42	114	8.21	0	0.236	0.017	0	6.74
SCLS1	5227922	1682466	70372	373	1620678	8951	6	61421	367	0	363.05	117	4.89	0.0259	0.281	0.00948	0.00025	4.27	0.0255	0	0.0228	0.000646	0.822	17175	9127	1442	966	17182	9070	140	130	4839844	1626588	66871	251	1567608	8142	0	58729	251	0	362.26	122	5.01	0.0188	0.291	0.00932	0.000212	4.4
SCSVF	1595	237	0	0	237	0	0	0	0	0	199.38	29.6	0	0	0.15	0	0	0	0	0	0	0	NaN	5	5	0	0	5	5	0	0
SCV20	829	192	0	0	192	0	0	0	0	0	829	192	0	0	0.232	0	0	0	0	0	0	0	NaN	2	1	0	0	2	1	0	0
SCVLA	2185	0	0	0	0	0	0	0	0	0	1092.5	0	0	0	0	0	0	0	0	0	NaN	NaN	NaN	0	0	0	0	0	0	0	0
SDVS5	3655	481	30	0	469	18	0	12	0	0	1827.5	240	15	0	0.143	0.00953	0	6	0	0	0.0168	0	0.4	9	2	1	1	8	2	0	0
SENDO	5710	1315	0	0	1315	0	0	0	0	0	634.44	146	0	0	0.355	0	0	0	0	0	0	0	NaN	9	7	0	0	9	7	0	0
SFAVA	37551	4835	803	0	4207	175	0	628	0	0	305.29	39.3	6.53	0	0.135	0.0204	0	5.11	0	0	0.0727	0	0.688	67	52	12	8	63	51	3	3	36827	4673	742	0	4106	175	0	567	0	0	304.36	38.6	6.13	0	0.13	0.0176	0	4.69
SFV	3685	446	0	0	446	0	0	0	0	0	1842.5	223	0	0	0.134	0	0	0	0	0	0	0	NaN	7	2	0	0	7	2	0	0
SFVCP	3577	746	0	0	746	0	0	0	0	0	715.4	149	0	0	0.276	0	0	0	0	0	0	0	NaN	10	5	0	0	10	5	0	0
SHEON	1342432	83655	12791	22	75094	4252	0	8539	22	0	330	20.6	3.14	0.00541	0.0657	0.00954	7.13e-06	2.1	0.00541	0	0.0745	0.000161	0.59	1477	1077	303	219	1366	1014	83	78	1275332	79690	12577	22	71306	4215	0	8362	22	0	328.95	20.6	3.24	0.00567	0.0656	0.00988	7.48e-06	2.16
SHIDS	1094416	65045	8189	0	59745	2889	0	5300	0	0	280.84	16.7	2.1	0	0.0628	0.00919	0	1.36	0	0	0.0608	0	0.559	1180	909	193	162	1119	861	64	63	970790	58211	7170	0	53227	2186	0	4984	0	0	296.24	17.8	2.19	0	0.0658	0.00814	0	1.52
SHV21	33202	3963	388	0	3643	68	0	320	0	0	442.69	52.8	5.17	0	0.146	0.0137	0	4.27	0	0	0.0498	0	0.75	49	34	7	6	47	34	1	1	33202	3963	388	0	3643	68	0	320	0	0	442.69	52.8	5.17	0	0.146	0.0137	0	4.27
SHVX	2832	642	0	0	642	0	0	0	0	0	472	107	0	0	0.284	0	0	0	0	0	0	0	NaN	9	5	0	0	9	5	0	0
SIFVH	12208	724	119	0	651	46	0	73	0	0	167.23	9.92	1.63	0	0.0897	0.0165	0	1	0	0	0.0777	0	0.558	18	15	3	3	16	14	1	1	12109	724	119	0	651	46	0	73	0	0	168.18	10.1	1.65	0	0.0909	0.0167	0	1.01
SINDV	6270	1073	0	0	1073	0	0	0	0	0	2090	358	0	0	0.159	0	0	0	0	0	0	0	NaN	11	3	0	0	11	3	0	0
SIRV1	8526	149	42	0	114	7	0	35	0	0	198.28	3.47	0.977	0	0.04	0.0116	0	0.814	0	0	0.333	0	0.833	3	3	1	1	2	2	0	0	8285	149	42	0	114	7	0	35	0	0	197.26	3.55	1	0	0.041	0.0119	0	0.833
SJNNV	1398	174	0	0	174	0	0	0	0	0	466	58	0	0	0.0917	0	0	0	0	0	0	0	NaN	2	2	0	0	2	2	0	0
SOCMV	2639	884	117	0	768	1	0	116	0	0	293.22	98.2	13	0	0.441	0.0503	0	12.9	0	0	0.0986	0	0.993	13	8	3	2	11	8	0	0
SOLLC	12001708	2822353	156336	28	2694981	28992	0	127344	28	0	344.52	81	4.49	0.000804	0.228	0.011	2.94e-06	3.66	0.000804	0	0.0282	5.11e-06	0.743	34052	20138	3097	2142	33567	19918	529	483	6495513	1816186	104010	28	1729600	17452	0	86558	28	0	354.69	99.2	5.68	0.00153	0.265	0.0125	5.6e-06	4.73
SOLTU	15884567	4016182	202491	0	3854462	40771	0	161720	0	0	299.08	75.6	3.81	0	0.263	0.0119	0	3.04	0	0	0.0288	0	0.729	49498	32077	4277	3325	48701	31621	740	715	6111611	1840622	91995	0	1764124	15497	0	76498	0	0	314.45	94.7	4.73	0	0.301	0.0117	0	3.94
SORBI	12615212	3520082	151596	95	3392801	24410	0	127186	95	0	384.66	107	4.62	0.0029	0.293	0.0115	8.32e-06	3.88	0.0029	0	0.0239	1.32e-05	0.786	41480	23509	3000	2139	41078	23309	399	372	6777753	2302557	102001	95	2216500	16039	0	85962	95	0	402.41	137	6.06	0.00564	0.367	0.013	1.62e-05	5.1
SOYBN	25995254	6517756	389629	0	6197467	69340	0	320289	0	0	402.01	101	6.03	0	0.242	0.0126	0	4.95	0	0	0.0303	0	0.75	76416	41454	7579	4972	75300	41078	1144	1052	6655787	1865239	104946	0	1778169	17876	0	87070	0	0	379.38	106	5.98	0	0.264	0.0116	0	4.96
SPETR	10264285	3491172	293348	31465	3208235	41856	5	251477	31445	0	514.09	175	14.7	1.58	0.299	0.0232	0.00157	12.6	1.57	0	0.0471	0.00364	0.786	31862	14247	4915	2501	31455	14047	677	533	7073847	2665433	209718	18235	2465086	27588	3	182115	18217	0	547.72	206	16.2	1.41	0.338	0.0245	0.00135	14.1
SPMMV	3456	232	0	0	232	0	0	0	0	0	3456	232	0	0	0.0671	0	0	0	0	0	0	0	NaN	3	1	0	0	3	1	0	0
SPTNK	4848	1197	290	154	769	16	0	274	154	0	230.86	57	13.8	7.33	0.342	0.0986	0.0253	13	7.33	0	0.17	0.06	0.965	15	15	5	4	14	13	0	0	4848	1197	290	154	769	16	0	274	154	0	230.86	57	13.8	7.33	0.342	0.0986	0.0253	13
SPV1C	2197	100	0	0	100	0	0	0	0	0	169	7.69	0	0	0.0552	0	0	0	0	0	0	0	NaN	2	2	0	0	2	2	0	0	2197	100	0	0	100	0	0	0	0	0	169	7.69	0	0	0.0552	0	0	0
SPV1R	2176	109	0	0	109	0	0	0	0	0	181.33	9.08	0	0	0.0657	0	0	0	0	0	0	0	NaN	2	2	0	0	2	2	0	0	2176	109	0	0	109	0	0	0	0	0	181.33	9.08	0	0	0.0657	0	0	0
SPV4	1423	169	0	0	169	0	0	0	0	0	158.11	18.8	0	0	0.217	0	0	0	0	0	0	0	NaN	3	3	0	0	3	3	0	0
SSDRV	1700	84	0	0	84	0	0	0	0	0	1700	84	0	0	0.0494	0	0	0	0	0	0	0	NaN	2	1	0	0	2	1	0	0
SSV1	4952	382	149	0	239	6	0	143	0	0	145.65	11.2	4.38	0	0.102	0.0428	0	4.21	0	0	0.35	0	0.965	8	8	4	4	5	5	0	0	4860	382	149	0	239	6	0	143	0	0	147.27	11.6	4.52	0	0.105	0.0441	0	4.33
STAA8	797321	81899	10302	31	73914	2348	0	7954	31	0	275.99	28.3	3.57	0.0107	0.0881	0.0101	2.75e-05	2.75	0.0107	0	0.0649	0.000247	0.637	1099	764	253	153	1074	728	53	52	746117	76829	9915	31	69133	2250	0	7665	31	0	279.65	28.8	3.72	0.0116	0.0859	0.0102	2.98e-05	2.87
STRCO	2629320	529178	12637	161	518310	1930	0	10707	161	0	327.11	65.8	1.57	0.02	0.206	0.00395	0.000107	1.33	0.02	0	0.0102	0.000314	0.774	8539	5145	273	197	8512	5124	44	37	2255756	474423	11520	161	464348	1606	0	9914	161	0	325.88	68.5	1.66	0.0233	0.217	0.00417	0.000124	1.43
STRPU	13953726	4180549	292809	8613	3915650	36492	31	256317	8582	0	489.42	147	10.3	0.302	0.258	0.0185	0.000597	8.99	0.301	0	0.0419	0.00128	0.804	39479	19088	5244	2903	39323	18818	612	536	8927365	3137427	210820	6804	2942815	22986	26	187834	6778	0	548.3	193	12.9	0.418	0.304	0.02	0.000739	11.5
STRR6	586642	39673	5897	639	34787	1650	0	4247	639	0	289.13	19.6	2.91	0.315	0.0648	0.00912	0.000123	2.09	0.315	0	0.0765	0.000625	0.617	664	481	138	102	625	452	36	36	556056	37129	5597	639	32513	1620	0	3977	639	0	297.67	19.9	3	0.342	0.0648	0.00966	0.000134	2.13
SULSO	827798	24732	6185	0	20929	2382	0	3803	0	0	281.76	8.42	2.11	0	0.0382	0.00855	0	1.29	0	0	0.0933	0	0.47	528	475	130	111	469	428	58	58	698181	20170	4739	0	17032	1601	0	3138	0	0	290.91	8.4	1.97	0	0.0365	0.00745	0	1.31
SV40	1681	341	0	0	341	0	0	0	0	0	280.17	56.8	0	0	0.139	0	0	0	0	0	0	0	NaN	8	4	0	0	8	4	0	0
SVSAP	2606	304	0	0	304	0	0	0	0	0	868.67	101	0	0	0.277	0	0	0	0	0	0	0	NaN	7	3	0	0	7	3	0	0
SWPV1	46268	2342	93	0	2293	44	0	49	0	0	316.9	16	0.637	0	0.0688	0.00412	0	0.336	0	0	0.0201	0	0.538	43	31	3	3	43	31	1	1	45999	2342	93	0	2293	44	0	49	0	0	317.23	16.2	0.641	0	0.0692	0.00414	0	0.338
SYNY3	1122758	78630	12813	0	70423	4606	0	8207	0	0	320.15	22.4	3.65	0	0.0726	0.0107	0	2.34	0	0	0.0698	0	0.537	1341	1007	283	215	1252	959	99	89	1040982	73370	12067	0	65496	4193	0	7874	0	0	327.25	23.1	3.79	0	0.0735	0.0108	0	2.48
TACVF	3370	250	0	0	250	0	0	0	0	0	842.5	62.5	0	0	0.161	0	0	0	0	0	0	0	NaN	6	3	0	0	6	3	0	0
TAEGU	8160757	2489878	250348	23042	2248265	31762	15	218586	23027	0	449.85	137	13.8	1.27	0.287	0.0256	0.00207	12	1.27	0	0.056	0.00445	0.797	24585	11915	4081	2121	23977	11656	499	415	5507084	1797779	174876	15458	1629548	22092	11	152784	15447	0	505.52	165	16.1	1.42	0.31	0.027	0.00157	14
TAKRU	30302607	9342000	919065	241167	8307587	125486	333	793579	240834	0	633.2	195	19.2	5.04	0.281	0.0267	0.00433	16.6	5.03	0	0.0545	0.00782	0.785	90303	36533	15086	7436	89065	36025	1984	1623	7013070	2368662	217727	25849	2151499	26356	57	191371	25792	0	593.37	200	18.4	2.19	0.303	0.025	0.00202	16.2
TASV1	3381	630	60	0	630	60	0	0	0	0	1127	210	20	0	0.198	0.0153	0	0	0	0	0	0	0	11	3	2	2	11	3	2	2
TBSVC	1567	108	0	0	108	0	0	0	0	0	391.75	27	0	0	0.0973	0	0	0	0	0	0	0	NaN	2	2	0	0	2	2	0	0
TETNG	12622263	3863281	366503	71372	3468313	42803	104	323700	71268	0	545.66	167	15.8	3.09	0.279	0.0242	0.00305	14	3.08	0	0.0503	0.00607	0.795	38373	16897	5839	2975	37773	16630	677	562	6307152	2097965	181248	20081	1918059	21390	33	159858	20048	0	534.96	178	15.4	1.7	0.303	0.0232	0.00194	13.6
TETTS	16031229	5930777	557092	280	5431180	57772	3	499320	277	0	649.09	240	22.6	0.0113	0.322	0.0278	1.3e-05	20.2	0.0112	0	0.0612	5.63e-05	0.846	47725	18343	10536	5479	48316	18112	970	872	13031748	5313454	521910	186	4842992	51631	3	470279	183	0	671.57	274	26.9	0.00959	0.353	0.0323	1.19e-05	24.2
THAPS	5824029	1940404	86795	0	1864292	10683	0	76112	0	0	497.02	166	7.41	0	0.295	0.0127	0	6.5	0	0	0.0269	0	0.823	21017	8605	1716	1071	21021	8544	172	163	5236995	1833566	81522	0	1761964	9920	0	71602	0	0	513.58	180	7.99	0	0.314	0.0136	0	7.02
THEAC	453225	18091	2708	0	16071	688	0	2020	0	0	305.82	12.2	1.83	0	0.0487	0.00646	0	1.36	0	0	0.043	0	0.59	393	332	50	33	369	319	15	13	441445	17860	2708	0	15840	688	0	2020	0	0	304.44	12.3	1.87	0	0.049	0.00661	0	1.39
THEAN	2024948	472529	24935	48	452050	4504	0	20431	48	0	534.29	125	6.58	0.0127	0.226	0.0116	2.04e-05	5.39	0.0127	0	0.0311	0.00022	0.755	5966	2690	535	342	5888	2664	83	77	1839163	440104	24219	48	420138	4301	0	19918	48	0	523.23	125	6.89	0.0137	0.231	0.0122	2.2e-05	5.67
THEAS	566890	55018	5848	0	50737	1567	0	4281	0	0	326.36	31.7	3.37	0	0.1	0.00894	0	2.46	0	0	0.0444	0	0.63	992	680	133	105	963	663	34	34	548475	53472	5652	0	49387	1567	0	4085	0	0	326.28	31.8	3.36	0	0.101	0.00901	0	2.43
THEEB	769931	55761	9986	19	48490	2734	0	7252	19	0	314.13	22.8	4.07	0.00775	0.077	0.0116	8.52e-05	2.96	0.00775	0	0.0807	0.000334	0.634	971	739	203	141	896	697	45	42	709203	49466	8983	19	42855	2391	0	6592	19	0	312.84	21.8	3.96	0.00838	0.0752	0.0116	9.21e-05	2.91
THEMA	582801	33969	8925	0	27409	2365	0	6560	0	0	314.69	18.3	4.82	0	0.0695	0.0135	0	3.54	0	0	0.105	0	0.646	644	510	185	117	555	466	46	41	550111	31963	8298	0	25884	2219	0	6079	0	0	314.17	18.3	4.74	0	0.0709	0.0137	0	3.47
THEPA	1895349	435998	22710	29	417798	4539	0	18171	29	0	465.57	107	5.58	0.00712	0.222	0.0123	2.65e-05	4.46	0.00712	0	0.032	0.000139	0.713	5406	2745	465	332	5331	2710	89	86	1767273	411953	22061	29	394058	4195	0	17866	29	0	463.24	108	5.78	0.0076	0.225	0.0128	2.83e-05	4.68
THEPD	544134	33613	5548	0	29366	1301	0	4247	0	0	290.05	17.9	2.96	0	0.0761	0.012	0	2.26	0	0	0.0721	0	0.677	671	540	103	78	616	506	22	21	514965	31294	5301	0	27215	1222	0	4079	0	0	291.43	17.7	3	0	0.0724	0.0123	0	2.31
THET8	663962	89211	6881	0	83470	1140	0	5741	0	0	298.14	40.1	3.09	0	0.139	0.00932	0	2.58	0	0	0.0337	0	0.771	1532	1040	141	94	1497	1020	19	18	623852	85504	6777	0	79780	1053	0	5724	0	0	301.23	41.3	3.27	0	0.139	0.00971	0	2.76
THEYD	608875	35638	8069	0	29911	2342	0	5727	0	0	307.2	18	4.07	0	0.0707	0.0143	0	2.89	0	0	0.106	0	0.633	662	519	177	129	584	472	45	42	583511	34337	7690	0	28893	2246	0	5444	0	0	308.9	18.2	4.07	0	0.0724	0.0144	0	2.88
THOGV	3637	286	0	0	286	0	0	0	0	0	519.57	40.9	0	0	0.0733	0	0	0	0	0	0	0	NaN	7	4	0	0	7	4	0	0
TMV	2043	145	0	0	145	0	0	0	0	0	681	48.3	0	0	0.117	0	0	0	0	0	0	0	NaN	2	2	0	0	2	2	0	0
TNVA	1187	194	0	0	194	0	0	0	0	0	237.4	38.8	0	0	0.238	0	0	0	0	0	0	0	NaN	4	3	0	0	4	3	0	0
TOBSV	2625	447	0	0	447	0	0	0	0	0	525	89.4	0	0	0.226	0	0	0	0	0	0	0	NaN	8	5	0	0	8	5	0	0
TORVR	4474	1105	0	0	1105	0	0	0	0	0	1118.5	276	0	0	0.399	0	0	0	0	0	0	0	NaN	12	4	0	0	12	4	0	0
TOTV	3543	311	42	0	269	0	0	42	0	0	1181	104	14	0	0.21	0.0749	0	14	0	0	0.159	0	1	4	3	1	1	4	3	0	0
TOXGO	5481678	3106705	101079	339	3014843	9556	0	91523	339	0	699.1	396	12.9	0.0432	0.472	0.0171	3.03e-05	11.7	0.0432	0	0.0271	3.66e-05	0.855	23330	6853	1973	1106	23536	6813	152	140	5378854	3072146	99163	339	2981914	9270	0	89893	339	0	709.99	406	13.1	0.0447	0.477	0.0172	3.14e-05	11.9
TPCTV	1065	241	0	0	241	0	0	0	0	0	177.5	40.2	0	0	0.286	0	0	0	0	0	0	0	NaN	5	4	0	0	5	4	0	0
TRIAD	5222991	971405	85694	815	902999	18103	0	67591	815	0	453.38	84.3	7.44	0.0707	0.175	0.0154	6.98e-05	5.87	0.0707	0	0.0515	0.000249	0.724	11362	6083	1772	1053	11036	5944	322	269	4402293	912910	80398	764	848186	16438	0	63960	764	0	470.33	97.5	8.59	0.0816	0.198	0.0179	6.72e-05	6.83
TRIVA	17055435	3424753	557202	694	2922154	55246	51	501956	643	0	339.81	68.2	11.1	0.0138	0.217	0.0234	1.38e-05	10	0.0128	0	0.0663	0.000138	0.812	41028	27840	8928	4374	39499	26860	913	838	9113720	2020457	461045	38	1602029	42655	0	418390	38	0	491.7	109	24.9	0.00205	0.228	0.0406	2e-06	22.6
TRVPP	2950	222	0	0	222	0	0	0	0	0	491.67	37	0	0	0.15	0	0	0	0	0	0	0	NaN	4	4	0	0	4	4	0	0
TRYB2	4345560	1156144	121235	0	1052884	17975	0	103260	0	0	506.06	135	14.1	0	0.25	0.0203	0	12	0	0	0.0466	0	0.785	13714	6029	2238	998	13368	5977	300	215	3962929	1090877	114301	0	993334	16758	0	97543	0	0	508	140	14.7	0	0.258	0.0207	0	12.5
TSWV1	5033	553	39	0	514	0	0	39	0	0	1006.6	111	7.8	0	0.149	0.0259	0	7.8	0	0	0.0716	0	1	12	5	1	1	11	5	0	0
TTV1K	4377	208	0	0	208	0	0	0	0	0	118.3	5.62	0	0	0.0449	0	0	0	0	0	0	0	NaN	4	4	0	0	4	4	0	0	4377	208	0	0	208	0	0	0	0	0	118.3	5.62	0	0	0.0449	0	0	0
TTVA1	972	300	0	0	300	0	0	0	0	0	486	150	0	0	0.408	0	0	0	0	0	0	0	NaN	4	2	0	0	4	2	0	0
TTVB1	883	353	0	0	353	0	0	0	0	0	294.33	118	0	0	0.566	0	0	0	0	0	0	0	NaN	4	3	0	0	4	3	0	0
TTVD1	775	415	0	0	415	0	0	0	0	0	258.33	138	0	0	0.598	0	0	0	0	0	0	0	NaN	5	3	0	0	5	3	0	0
TTVE1	1041	449	0	0	449	0	0	0	0	0	260.25	112	0	0	0.479	0	0	0	0	0	0	0	NaN	5	3	0	0	5	3	0	0
TTVF1	772	375	0	0	375	0	0	0	0	0	257.33	125	0	0	0.505	0	0	0	0	0	0	0	NaN	4	3	0	0	4	3	0	0
TTVG1	932	348	0	0	348	0	0	0	0	0	466	174	0	0	0.478	0	0	0	0	0	0	0	NaN	4	2	0	0	4	2	0	0
TTVI1	932	315	0	0	315	0	0	0	0	0	310.67	105	0	0	0.335	0	0	0	0	0	0	0	NaN	3	2	0	0	3	2	0	0
TTVT1	920	486	34	0	452	0	0	34	0	0	306.67	162	11.3	0	0.721	0.0197	0	11.3	0	0	0.0717	0	1	6	3	1	1	6	3	0	0
TTVZ1	1001	500	0	0	500	0	0	0	0	0	333.67	167	0	0	0.671	0	0	0	0	0	0	0	NaN	4	3	0	0	4	3	0	0
TUBMM	3279832	1069426	49551	0	1025996	6121	0	43430	0	0	437.66	143	6.61	0	0.304	0.0118	0	5.8	0	0	0.0259	0	0.829	10551	5366	953	593	10514	5330	98	87	3146744	1052753	48749	0	1009992	5988	0	42761	0	0	442.46	148	6.85	0	0.313	0.0121	0	6.01
TYMV	2661	1215	0	0	1215	0	0	0	0	0	887	405	0	0	0.489	0	0	0	0	0	0	0	NaN	7	3	0	0	7	3	0	0
USTMA	4000743	1625463	52132	190	1579385	6200	44	45932	146	0	610.99	248	7.96	0.029	0.365	0.0106	6.89e-05	7.01	0.0223	0	0.0189	5.82e-05	0.83	14609	5583	1032	680	14651	5561	95	86	3870101	1600179	51939	190	1554264	6170	44	45769	146	0	617.93	255	8.29	0.0303	0.373	0.011	7.2e-05	7.31
UUKS	3638	342	0	0	342	0	0	0	0	0	909.5	85.5	0	0	0.0631	0	0	0	0	0	0	0	NaN	7	2	0	0	7	2	0	0
VACCW	56795	4124	537	0	3670	83	0	454	0	0	261.73	19	2.47	0	0.0966	0.00824	0	2.09	0	0	0.0359	0	0.64	61	52	11	7	62	52	2	2	56134	4124	537	0	3670	83	0	454	0	0	261.09	19.2	2.5	0	0.0975	0.00832	0	2.11
VAR67	54427	4171	472	0	3755	56	0	416	0	0	273.5	21	2.37	0	0.0829	0.00862	0	2.09	0	0	0.0441	0	0.749	64	47	9	6	61	46	1	1	53767	4171	472	0	3755	56	0	416	0	0	272.93	21.2	2.4	0	0.0838	0.00871	0	2.11
VESVA	2692	342	0	0	342	0	0	0	0	0	897.33	114	0	0	0.0857	0	0	0	0	0	0	0	NaN	6	2	0	0	6	2	0	0
VIBCH	1153846	71018	13924	0	61746	4652	0	9272	0	0	304.93	18.8	3.68	0	0.0692	0.0104	0	2.45	0	0	0.0899	0	0.592	1260	940	331	245	1151	878	97	86	1103558	67710	13274	0	59005	4569	0	8705	0	0	306.88	18.8	3.69	0	0.0694	0.0105	0	2.42
VIBF1	1236819	81870	13183	0	73250	4563	0	8620	0	0	324.37	21.5	3.46	0	0.0697	0.00952	0	2.26	0	0	0.0738	0	0.591	1456	1078	317	236	1354	1022	92	85	1165785	75810	11965	0	67966	4121	0	7844	0	0	323.29	21	3.32	0	0.0685	0.00939	0	2.18
VITVI	10756843	2353652	129837	81	2249986	26252	0	103585	81	0	360.53	78.9	4.35	0.00271	0.214	0.00996	5.03e-06	3.47	0.00271	0	0.0271	1.56e-05	0.72	29424	17138	2634	1796	29037	16946	465	426	5869070	1606943	89495	53	1533448	16053	0	73442	53	0	366.27	100	5.59	0.00331	0.258	0.0113	5.93e-06	4.58
VSIVA	3603	358	0	0	358	0	0	0	0	0	600.5	59.7	0	0	0.209	0	0	0	0	0	0	0	NaN	9	4	0	0	9	4	0	0
VZVD	35782	5064	237	0	4896	69	0	168	0	0	518.58	73.4	3.43	0	0.157	0.00308	0	2.43	0	0	0.0214	0	0.778	68	44	7	4	64	43	1	1	35782	5064	237	0	4896	69	0	168	0	0	518.58	73.4	3.43	0	0.157	0.00308	0	2.43
WBV24	13035	1598	122	0	1538	62	0	60	0	0	2607	320	24.4	0	0.145	0.0124	0	12	0	0	0.0262	0	0.667	19	3	4	3	19	3	2	1
WCCVB	1103	112	0	0	112	0	0	0	0	0	551.5	56	0	0	0.107	0	0	0	0	0	0	0	NaN	2	2	0	0	2	2	0	0
WDSV	4217	906	31	0	876	1	0	30	0	0	702.83	151	5.17	0	0.2	0.0174	0	5	0	0	0.0968	0	0.968	12	5	1	1	12	5	0	0
WSSVS	124910	33951	1447	541	32163	200	0	1247	541	0	234.79	63.8	2.72	1.02	0.215	0.00854	0.000604	2.34	1.02	0	0.0229	0.00169	0.765	453	238	32	23	452	234	3	3	122664	33510	1391	541	31758	180	0	1211	541	0	236.8	64.7	2.69	1.04	0.217	0.00857	0.00062	2.34
XANCP	1418660	168418	9509	0	161146	2237	0	7272	0	0	343.75	40.8	2.3	0	0.124	0.00705	0	1.76	0	0	0.0265	0	0.685	2834	1857	226	175	2761	1840	50	49	1324654	158614	7928	0	152454	1768	0	6160	0	0	342.82	41	2.05	0	0.125	0.00603	0	1.59
XENTR	12595279	3676030	360848	31584	3334487	50819	70	310029	31514	0	536.24	157	15.4	1.34	0.26	0.0231	0.00149	13.2	1.34	0	0.0532	0.00428	0.775	36578	16349	5983	3097	35716	16087	809	672	6786855	2180993	203375	13639	1991279	27287	13	176088	13626	0	583.26	187	17.5	1.17	0.289	0.0245	0.00122	15.1
XMRV6	2914	716	46	0	716	46	0	0	0	0	971.33	239	15.3	0	0.297	0.0238	0	0	0	0	0	0	0	8	3	1	1	8	3	1	1
YARLI	3092655	905148	50393	85	861500	6830	0	43563	85	0	482.1	141	7.86	0.0133	0.278	0.0159	1.94e-05	6.79	0.0133	0	0.0339	5.5e-05	0.79	8670	4634	1004	664	8652	4583	124	121	2794003	874646	49300	85	831791	6530	0	42770	85	0	482.81	151	8.52	0.0147	0.297	0.0171	2.15e-05	7.39
YEAST	3012350	824398	44227	0	786653	6482	0	37745	0	0	454.42	124	6.67	0	0.246	0.0132	0	5.69	0	0	0.0322	0	0.781	8499	4342	900	623	8404	4297	114	111	2569360	725034	42411	0	688576	5953	0	36458	0	0	448.8	127	7.41	0	0.255	0.0144	0	6.37
YEFV1	3411	185	0	0	185	0	0	0	0	0	3411	185	0	0	0.0542	0	0	0	0	0	0	0	NaN	5	1	0	0	5	1	0	0
YERPE	1243291	82350	8423	0	76663	2736	0	5687	0	0	318.14	21.1	2.16	0	0.0662	0.00741	0	1.46	0	0	0.05	0	0.601	1437	1011	203	149	1384	973	59	55	1165926	75681	8002	0	70206	2527	0	5475	0	0	317.43	20.6	2.18	0	0.0652	0.0073	0	1.49
YMTV5	42362	2125	118	0	2051	44	0	74	0	0	302.59	15.2	0.843	0	0.0731	0.00319	0	0.529	0	0	0.0255	0	0.604	40	30	3	3	39	30	1	1	42028	2125	118	0	2051	44	0	74	0	0	302.36	15.3	0.849	0	0.0737	0.00321	0	0.532
[truncated: 13 more columns]

## Sheet: IUPred-paircoil
ORG	ALLRES	IDP_RES	CC_RES	CLG_RES	PURE_IDP_RES	PURE_CC_RES	PURE_CLG_RES	CC_IDP	CLG_IDP	CC_CLG	RES_PERSEQ	IDP_PERSEQ	CC_PERSEQ	CLG_PERSEQ	IDP_PER_LEN_PERSEQ	CC_PER_LEN_PERSEQ	CLG_PER_LEN_PERSEQ	CC_IDP_PERSEQ	CLG_IDP_PERSEQ	CLG_CC_PERSEQ	CCIDP_PER_IDP_PERSEQ	CLGIDP_PER_IDP_PERSEQ	CCIDP_PER_CC_PERSEQ	IDP_SEG	IDP_SEGSQ	CC_SEG	CC_SEGSQ	PURE_IDP_SEG	PURE_IDP_SEGSQ	PURE_CC_SEG	PURE_CC_SEGSQ	ALLRES_40	IDP_RES_40	CC_RES_40	CLG_RES_40	PURE_IDP_RES_40	PURE_CC_RES_40	PURE_CLG_RES_40	CC_IDP_40	CLG_IDP_40	CC_CLG_40	RES_PERSEQ_40	IDP_PERSEQ_40	CC_PERSEQ_40	CLG_PERSEQ_40	IDP_PER_LEN_PERSEQ_40	CC_PER_LEN_PERSEQ_40	CLG_PER_LEN_PERSEQ_40	CC_IDP_PERSEQ_40
AADNV	1532	297	0	0	297	0	0	0	0	0	510.67	99	0	0	0.192	0	0	0	0	0	0	0	NaN	5	3	0	0	5	3	0	0
AAV2S	2601	275	0	0	275	0	0	0	0	0	520.2	55	0	0	0.0927	0	0	0	0	0	0	0	NaN	5	3	0	0	5	3	0	0
ABLVB	3612	88	0	0	88	0	0	0	0	0	722.4	17.6	0	0	0.0593	0	0	0	0	0	0	0	NaN	2	1	0	0	2	1	0	0
ABPVR	2902	93	0	0	93	0	0	0	0	0	967.33	31	0	0	0.0343	0	0	0	0	0	0	0	NaN	2	1	0	0	2	1	0	0
ABVP	7181	126	30	0	126	30	0	0	0	0	132.98	2.33	0.556	0	0.0105	0.00118	0	0	0	0	0	0	0	3	3	1	1	3	3	1	1	7181	126	30	0	126	30	0	0	0	0	132.98	2.33	0.556	0	0.0105	0.00118	0	0
ACLSP	2537	242	0	0	242	0	0	0	0	0	845.67	80.7	0	0	0.15	0	0	0	0	0	0	0	NaN	2	2	0	0	2	2	0	0
ADE02	12874	2950	77	0	2950	77	0	0	0	0	286.09	65.6	1.71	0	0.26	0.0127	0	0	0	0	0	0	0	42	27	2	2	42	27	2	2	12679	2825	77	0	2825	77	0	0	0	0	288.16	64.2	1.75	0	0.252	0.013	0	0
ADEF1	8125	147	0	0	147	0	0	0	0	0	353.26	6.39	0	0	0.0135	0	0	0	0	0	0	0	NaN	4	4	0	0	4	4	0	0	8018	147	0	0	147	0	0	0	0	0	364.45	6.68	0	0	0.0142	0	0	0
ADEG1	12494	990	0	0	990	0	0	0	0	0	328.79	26.1	0	0	0.0829	0	0	0	0	0	0	0	NaN	13	11	0	0	13	11	0	0	12494	990	0	0	990	0	0	0	0	0	328.79	26.1	0	0	0.0829	0	0	0
ADEO7	9187	305	0	0	305	0	0	0	0	0	306.23	10.2	0	0	0.06	0	0	0	0	0	0	0	NaN	7	7	0	0	7	7	0	0	8814	246	0	0	246	0	0	0	0	0	326.44	9.11	0	0	0.0296	0	0	0
ADVG	1383	146	0	0	146	0	0	0	0	0	345.75	36.5	0	0	0.279	0	0	0	0	0	0	0	NaN	3	2	0	0	3	2	0	0
AEDAE	7684696	1201318	151582	1220	1167867	119351	0	32231	1220	0	461.43	72.1	9.1	0.0733	0.126	0.0156	7.16e-05	1.94	0.0733	0	0.0297	0.000368	0.252	14126	6193	2711	1590	13713	6090	2114	1187	5831795	1023922	120073	942	998004	95097	0	24976	942	0	493.3	86.6	10.2	0.0797	0.144	0.0163	7.28e-05	2.11
AEVCA	2134	0	0	0	0	0	0	0	0	0	2134	0	0	0	0	0	0	0	0	0	NaN	NaN	NaN	0	0	0	0	0	0	0	0
AFV1Y	6405	46	31	0	46	31	0	0	0	0	160.12	1.15	0.775	0	0.00852	0.00824	0	0	0	0	0	0	0	1	1	1	1	1	1	1	1	6357	46	31	0	46	31	0	0	0	0	163	1.18	0.795	0	0.00874	0.00846	0	0
AFV2P	9110	211	61	0	211	61	0	0	0	0	175.19	4.06	1.17	0	0.0229	0.00771	0	0	0	0	0	0	0	5	4	2	2	5	4	2	2	9110	211	61	0	211	61	0	0	0	0	175.19	4.06	1.17	0	0.0229	0.00771	0	0
AGRT5	1660808	30199	10173	0	29440	9414	0	759	0	0	310.78	5.65	1.9	0	0.0193	0.00538	0	0.142	0	0	0.0219	0	0.0605	481	367	253	185	468	360	233	174	1502253	29478	9240	0	28768	8530	0	710	0	0	309.42	6.07	1.9	0	0.0206	0.00548	0	0.146
AHV2H	1317	66	0	0	66	0	0	0	0	0	658.5	33	0	0	0.0506	0	0	0	0	0	0	0	NaN	1	1	0	0	1	1	0	0
AILME	11395861	1868195	327009	32601	1779568	270689	285	56311	32307	0	539.09	88.4	15.5	1.54	0.136	0.0224	0.00157	2.66	1.53	0	0.0307	0.00681	0.206	22125	9159	5490	2649	21317	8988	4536	2140	7593726	1420468	222985	17398	1364274	184032	154	38950	17241	0	561.67	105	16.5	1.29	0.159	0.0234	0.00141	2.88
AJECG	4155681	841155	54298	69	822313	35491	34	18807	35	0	451.02	91.3	5.89	0.00749	0.17	0.0102	2.07e-05	2.04	0.0038	0	0.0176	4.67e-05	0.36	9396	4429	1079	699	9250	4404	667	437	4016255	835816	53736	69	817058	35013	34	18723	35	0	452.79	94.2	6.06	0.00778	0.175	0.0105	2.15e-05	2.11
ALHV1	34799	3506	220	0	3474	188	0	32	0	0	497.13	50.1	3.14	0	0.097	0.00949	0	0.457	0	0	0.0207	0	0.143	29	17	7	7	28	17	6	6	34799	3506	220	0	3474	188	0	32	0	0	497.13	50.1	3.14	0	0.097	0.00949	0	0.457
AMEPV	71083	342	879	0	334	871	0	8	0	0	255.69	1.23	3.16	0	0.00596	0.0127	0	0.0288	0	0	0.0364	0	0.0161	5	5	17	16	5	5	16	15	67732	342	523	0	334	515	0	8	0	0	254.63	1.29	1.97	0	0.00623	0.00963	0	0.0301
AMPQE	11680538	1109695	289781	12034	1035471	226737	854	63044	11180	0	392.74	37.3	9.74	0.405	0.0865	0.021	0.000831	2.12	0.376	0	0.0572	0.00652	0.207	13539	7616	4988	3069	12631	7303	4034	2504	6660650	866829	178665	7061	816486	135147	236	43518	6825	0	444.99	57.9	11.9	0.472	0.12	0.0219	0.000684	2.91
AMPV1	4353	604	30	0	604	30	0	0	0	0	483.67	67.1	3.33	0	0.154	0.00621	0	0	0	0	0	0	0	4	3	1	1	4	3	1	1
AMVLE	2437	0	36	0	0	36	0	0	0	0	609.25	0	9	0	0	0.00799	0	0	0	0	NaN	NaN	0	0	0	1	1	0	0	1	1
ANOCA	10131784	1363545	297417	28605	1284188	246336	322	51074	28276	0	530.21	71.4	15.6	1.5	0.112	0.0244	0.00156	2.67	1.48	0	0.0392	0.00818	0.206	17041	7165	4965	2495	16242	6994	4120	1999	6811032	1075315	217370	15694	1022232	179772	202	37591	15485	0	558.69	88.2	17.8	1.29	0.134	0.027	0.00132	3.08
ANODA	5911342	1355899	99969	3297	1328403	75674	96	24295	3201	0	516.86	119	8.74	0.288	0.195	0.0139	0.000339	2.12	0.28	0	0.0194	0.000886	0.283	15242	6094	1887	1124	14972	6031	1368	804	5627809	1347480	97840	2808	1320667	73816	19	24024	2789	0	525.37	126	9.13	0.262	0.206	0.0143	0.000323	2.24
ANOGA	7037845	1401318	135321	3527	1364861	102373	18	32948	3509	0	538.39	107	10.4	0.27	0.149	0.0155	0.00034	2.52	0.268	0	0.0286	0.00104	0.281	14810	5449	2457	1326	14428	5377	1826	968	5788611	1233984	116391	2354	1204086	88847	0	27544	2354	0	561.51	120	11.3	0.228	0.164	0.0162	0.000284	2.67
APIME	5942177	903717	146765	7297	869385	119417	313	27348	6984	0	542.27	82.5	13.4	0.666	0.115	0.0192	0.000635	2.5	0.637	0	0.0314	0.0028	0.23	10561	3921	2570	1358	10246	3860	2086	1056	5179731	813411	124732	5790	785260	102070	301	22662	5489	0	560.64	88	13.5	0.627	0.12	0.0196	0.000593	2.45
APRVF	7194	166	34	0	166	34	0	0	0	0	799.33	18.4	3.78	0	0.0258	0.00318	0	0	0	0	0	0	0	2	2	1	1	2	2	1	1
AQRVC	7609	193	121	0	193	121	0	0	0	0	634.08	16.1	10.1	0	0.0179	0.0136	0	0	0	0	0	0	0	4	2	3	1	4	2	3	1	7609	193	121	0	193	121	0	0	0	0	634.08	16.1	10.1	0	0.0179	0.0136	0	0
AQRVG	7577	319	104	0	319	104	0	0	0	0	631.42	26.6	8.67	0	0.0403	0.0118	0	0	0	0	0	0	0	5	3	2	1	5	3	2	1	7577	319	104	0	319	104	0	0	0	0	631.42	26.6	8.67	0	0.0403	0.0118	0	0
AQUAE	488962	600	8226	0	600	8226	0	0	0	0	314.85	0.386	5.3	0	0.00229	0.0168	0	0	0	0	0	0	0	14	14	168	127	14	14	168	127	473754	600	7998	0	600	7998	0	0	0	0	314.79	0.399	5.31	0	0.00236	0.0168	0	0
ARATH	12988977	1264849	203494	29	1230415	169089	0	34405	29	0	408.36	39.8	6.4	0.000912	0.0906	0.0136	3.75e-06	1.08	0.000912	0	0.0261	2.96e-05	0.194	17602	9595	3995	2650	17107	9442	3215	2116	6162071	762279	108860	29	742925	89535	0	19325	29	0	402.17	49.8	7.1	0.00189	0.113	0.0145	7.79e-06	1.26
ARCFU	660835	1196	6269	0	1138	6211	0	58	0	0	275.58	0.499	2.61	0	0.0021	0.00943	0	0.0242	0	0	0.0425	0	0.0164	25	24	138	96	24	23	136	94	607884	1196	5784	0	1138	5726	0	58	0	0	275.93	0.543	2.63	0	0.00229	0.00957	0	0.0263
ASFB7	49803	827	139	0	827	139	0	0	0	0	334.25	5.55	0.933	0	0.0286	0.00256	0	0	0	0	0	0	0	14	13	3	3	14	13	3	3	45275	827	139	0	827	139	0	0	0	0	332.9	6.08	1.02	0	0.0314	0.0028	0	0
ASGVP	2425	84	0	0	84	0	0	0	0	0	1212.5	42	0	0	0.0663	0	0	0	0	0	0	0	NaN	2	2	0	0	2	2	0	0
ASHGO	2330700	266022	37045	0	259930	30953	0	6092	0	0	489.64	55.9	7.78	0	0.103	0.0162	0	1.28	0	0	0.023	0	0.175	3475	1750	757	502	3397	1731	626	408	2255986	264503	36563	0	258446	30506	0	6057	0	0	491.71	57.7	7.97	0	0.106	0.0166	0	1.32
ASPFU	4742739	771289	59759	210	750660	39237	103	20522	107	0	491.53	79.9	6.19	0.0218	0.142	0.0107	0.000102	2.13	0.0111	0	0.0224	0.000845	0.361	8497	4086	1161	776	8327	4051	746	490	4366533	760470	59131	210	739979	38747	103	20384	107	0	495.3	86.3	6.71	0.0238	0.153	0.0115	0.000111	2.31
ASPVP	3010	215	0	0	215	0	0	0	0	0	602	43	0	0	0.104	0	0	0	0	0	0	0	NaN	1	1	0	0	1	1	0	0
ATV	19264	1366	236	0	1336	206	0	30	0	0	267.56	19	3.28	0	0.025	0.00481	0	0.417	0	0	0.011	0	0.0882	9	6	6	5	10	6	5	5	18073	1316	236	0	1286	206	0	30	0	0	265.78	19.4	3.47	0	0.0244	0.00509	0	0.441
BABBO	1850772	124653	23481	0	121428	20256	0	3225	0	0	501.97	33.8	6.37	0	0.0643	0.0117	0	0.875	0	0	0.0218	0	0.103	1748	1005	477	316	1704	992	427	282	1665251	121512	19733	0	118414	16635	0	3098	0	0	495.61	36.2	5.87	0	0.0675	0.0117	0	0.922
BACAN	1439306	17709	14137	696	14984	11952	156	2185	540	0	262.03	3.22	2.57	0.127	0.0144	0.00844	0.00038	0.398	0.0983	0	0.127	0.0109	0.107	290	223	317	241	252	195	276	217	1267270	16738	13014	594	14188	11004	54	2010	540	0	259.26	3.42	2.66	0.122	0.0154	0.00864	0.000336	0.411
BACCR	1453967	20866	15405	2284	16502	13268	57	2137	2227	0	277.47	3.98	2.94	0.436	0.0137	0.0102	0.000827	0.408	0.425	0	0.113	0.0417	0.0934	300	230	351	267	256	195	316	246	1267079	18027	13972	1750	14357	12032	20	1940	1730	0	273.43	3.89	3.02	0.378	0.0139	0.0103	0.000657	0.419
BACSU	1230988	17285	12521	0	15978	11214	0	1307	0	0	293.16	4.12	2.98	0	0.0196	0.0108	0	0.311	0	0	0.0678	0	0.0791	302	246	289	218	281	234	268	203	1103278	16384	11880	0	15108	10604	0	1276	0	0	288.67	4.29	3.11	0	0.0209	0.0114	0	0.334
BACTN	1864427	13054	11927	87	12398	11301	57	626	30	0	389.88	2.73	2.49	0.0182	0.00834	0.00647	1.46e-05	0.131	0.00627	0	0.0362	0.0126	0.0506	224	191	286	238	212	186	273	226	1573896	11751	10807	87	11138	10224	57	583	30	0	381.09	2.85	2.62	0.0211	0.00865	0.00691	1.69e-05	0.141
BATDJ	3887913	405032	62829	97	397009	54903	0	7926	97	0	451.56	47	7.3	0.0113	0.0985	0.0155	4.08e-05	0.921	0.0113	0	0.0194	0.000454	0.152	5853	2933	1391	848	5744	2906	1174	717	3284489	353764	53598	97	346417	46348	0	7250	97	0	480.54	51.8	7.84	0.0142	0.0996	0.0144	5.14e-05	1.06
BAVJK	5924	77	44	0	77	44	0	0	0	0	493.67	6.42	3.67	0	0.0103	0.00863	0	0	0	0	0	0	0	2	2	1	1	2	2	1	1	5924	77	44	0	77	44	0	0	0	0	493.67	6.42	3.67	0	0.0103	0.00863	0	0
BAYMY	3300	33	31	0	33	31	0	0	0	0	1650	16.5	15.5	0	0.00685	0.0174	0	0	0	0	0	0	0	1	1	1	1	1	1	1	1
BBTVA	1023	0	0	0	0	0	0	0	0	0	146.14	0	0	0	0	0	0	0	0	0	NaN	NaN	NaN	0	0	0	0	0	0	0	0
BBWVS	2860	0	0	0	0	0	0	0	0	0	1430	0	0	0	0	0	0	0	0	0	NaN	NaN	NaN	0	0	0	0	0	0	0	0
BCTVC	1196	120	0	0	120	0	0	0	0	0	170.86	17.1	0	0	0.134	0	0	0	0	0	0	0	NaN	3	3	0	0	3	3	0	0
BDVV	2927	76	0	0	76	0	0	0	0	0	585.4	15.2	0	0	0.0756	0	0	0	0	0	0	0	NaN	1	1	0	0	1	1	0	0
BECN1	2435	33	0	0	33	0	0	0	0	0	1217.5	16.5	0	0	0.00747	0	0	0	0	0	0	0	NaN	1	1	0	0	1	1	0	0
BEFVB	4809	30	0	0	30	0	0	0	0	0	400.75	2.5	0	0	0.00899	0	0	0	0	0	0	0	NaN	1	1	0	0	1	1	0	0	4809	30	0	0	30	0	0	0	0	0	400.75	2.5	0	0	0.00899	0	0	0
BGYMJ	1755	123	0	0	123	0	0	0	0	0	195	13.7	0	0	0.114	0	0	0	0	0	0	0	NaN	3	3	0	0	3	3	0	0
BIFLO	638887	31641	4315	0	30426	3100	0	1215	0	0	370.37	18.3	2.5	0	0.0505	0.00589	0	0.704	0	0	0.0207	0	0.183	515	372	97	73	499	368	76	63	612243	31426	4254	0	30211	3039	0	1215	0	0	369.71	19	2.57	0	0.0524	0.00603	0	0.734
BMV	2275	42	0	0	42	0	0	0	0	0	568.75	10.5	0	0	0.0109	0	0	0	0	0	0	0	NaN	1	1	0	0	1	1	0	0
BNYVS	4291	109	0	0	109	0	0	0	0	0	476.78	12.1	0	0	0.0218	0	0	0	0	0	0	0	NaN	2	2	0	0	2	2	0	0
BOMMO	6003903	820216	110777	5490	795605	91543	113	19234	5377	0	406.3	55.5	7.5	0.372	0.115	0.0146	0.000418	1.3	0.364	0	0.0245	0.00183	0.214	10561	4891	2107	1192	10323	4814	1710	939	5420915	798169	107715	4225	775213	88983	1	18732	4224	0	428.46	63.1	8.51	0.334	0.127	0.0161	0.000383	1.48
BORBU	381092	4688	7304	0	3735	6351	0	953	0	0	295.65	3.64	5.67	0	0.0135	0.0196	0	0.739	0	0	0.13	0	0.0771	77	67	165	115	70	63	150	111	310717	3073	4431	0	2479	3837	0	594	0	0	312.59	3.09	4.46	0	0.0112	0.0133	0	0.598
BORPE	1065161	16033	4895	40	15459	4361	0	534	40	0	326.64	4.92	1.5	0.0123	0.0166	0.0044	2.33e-05	0.164	0.0123	0	0.0233	0.00106	0.0798	279	228	117	90	270	222	103	81	959672	15849	4709	40	15275	4175	0	534	40	0	324.43	5.36	1.59	0.0135	0.0182	0.00473	2.57e-05	0.181
BOTVF	2198	349	0	0	349	0	0	0	0	0	1099	174	0	0	0.262	0	0	0	0	0	0	0	NaN	3	2	0	0	3	2	0	0
BOTVX	2351	196	0	0	196	0	0	0	0	0	470.2	39.2	0	0	0.065	0	0	0	0	0	0	0	NaN	4	3	0	0	4	3	0	0
BOVIN	12700801	2081605	372047	33335	1986065	309488	312	62517	32981	0	532.08	87.2	15.6	1.4	0.133	0.0231	0.00159	2.62	1.38	0	0.031	0.00691	0.199	24299	10189	6188	3032	23337	9994	5144	2466	7675561	1483783	230606	19925	1423668	190279	130	40320	19788	0	580.73	112	17.4	1.51	0.161	0.0242	0.00158	3.05
BPCHP	1648	0	0	0	0	0	0	0	0	0	206	0	0	0	0	0	0	0	0	0	NaN	NaN	NaN	0	0	0	0	0	0	0	0
BPHC1	9882	88	59	0	88	59	0	0	0	0	241.02	2.15	1.44	0	0.00741	0.0125	0	0	0	0	0	0	0	2	2	1	1	2	2	1	1	9882	88	59	0	88	59	0	0	0	0	241.02	2.15	1.44	0	0.00741	0.0125	0	0
BPL2	3273	0	39	0	0	39	0	0	0	0	233.79	0	2.79	0	0	0.0173	0	0	0	0	NaN	NaN	0	0	0	1	1	0	0	1	1	3273	0	39	0	0	39	0	0	0	0	233.79	0	2.79	0	0	0.0173	0	0
BPLC2	6900	100	178	0	74	152	0	26	0	0	176.92	2.56	4.56	0	0.00813	0.0139	0	0.667	0	0	0.188	0	0.151	3	2	4	4	1	1	3	3	6900	100	178	0	74	152	0	26	0	0	176.92	2.56	4.56	0	0.00813	0.0139	0	0.667
BPM13	1945	162	0	0	162	0	0	0	0	0	216.11	18	0	0	0.0425	0	0	0	0	0	0	0	NaN	3	1	0	0	3	1	0	0
BPML5	15251	649	229	0	649	229	0	0	0	0	179.42	7.64	2.69	0	0.0582	0.0148	0	0	0	0	0	0	0	16	13	6	6	16	13	6	6	15251	649	229	0	649	229	0	0	0	0	179.42	7.64	2.69	0	0.0582	0.0148	0	0
BPMS2	1143	0	0	0	0	0	0	0	0	0	285.75	0	0	0	0	0	0	0	0	0	NaN	NaN	NaN	0	0	0	0	0	0	0	0
BPMU	11133	154	99	0	154	99	0	0	0	0	214.1	2.96	1.9	0	0.0162	0.00929	0	0	0	0	0	0	0	4	4	3	3	4	4	3	3	11133	154	99	0	154	99	0	0	0	0	214.1	2.96	1.9	0	0.0162	0.00929	0	0
BPMX1	1469	0	0	0	0	0	0	0	0	0	367.25	0	0	0	0	0	0	0	0	0	NaN	NaN	NaN	0	0	0	0	0	0	0	0
BPN15	14190	483	181	0	478	176	0	5	0	0	236.5	8.05	3.02	0	0.0336	0.0115	0	0.0833	0	0	0.0119	0	0.0333	9	6	5	5	9	6	4	4	14053	374	181	0	369	176	0	5	0	0	238.19	6.34	3.07	0	0.0207	0.0117	0	0.0847
BPN4	22029	651	292	0	625	266	0	26	0	0	305.96	9.04	4.06	0	0.0228	0.00813	0	0.361	0	0	0.0226	0	0.0985	11	9	8	6	11	9	7	5	22029	651	292	0	625	266	0	26	0	0	305.96	9.04	4.06	0	0.0228	0.00813	0	0.361
BPP1	28126	833	760	0	782	709	0	51	0	0	255.69	7.57	6.91	0	0.027	0.0207	0	0.464	0	0	0.0943	0	0.0789	19	12	16	14	17	11	15	13	27687	833	730	0	782	679	0	51	0	0	256.36	7.71	6.76	0	0.0275	0.02	0	0.472
BPP2	10467	314	186	0	311	183	0	3	0	0	243.42	7.3	4.33	0	0.025	0.0123	0	0.0698	0	0	0.0105	0	0.0217	7	7	5	3	7	7	5	3	10376	314	186	0	311	183	0	3	0	0	247.05	7.48	4.43	0	0.0256	0.0126	0	0.0714
BPP22	12419	390	272	0	390	272	0	0	0	0	194.05	6.09	4.25	0	0.0309	0.019	0	0	0	0	0	0	0	7	6	6	5	7	6	6	5	12419	390	272	0	390	272	0	0	0	0	194.05	6.09	4.25	0	0.0309	0.019	0	0
BPPH6	3573	0	0	0	0	0	0	0	0	0	274.85	0	0	0	0	0	0	0	0	0	NaN	NaN	NaN	0	0	0	0	0	0	0	0	3573	0	0	0	0	0	0	0	0	0	274.85	0	0	0	0	0	0	0
BPPHC	12454	827	38	48	779	38	0	0	48	0	234.98	15.6	0.717	0.906	0.0526	0.00797	0.00147	0	0.906	0	0	0.044	0	15	10	1	1	14	10	1	1	12361	827	38	48	779	38	0	0	48	0	237.71	15.9	0.731	0.923	0.0536	0.00812	0.0015	0
BPPHE	42234	1265	1132	0	1141	1008	0	124	0	0	191.1	5.72	5.12	0	0.0233	0.0304	0	0.561	0	0	0.131	0	0.0923	20	14	28	19	17	12	24	17	41987	1265	1099	0	1141	975	0	124	0	0	191.72	5.78	5.02	0	0.0236	0.0299	0	0.566
BPPHM	1677	357	41	0	357	41	0	0	0	0	152.45	32.5	3.73	0	0.37	0.0187	0	0	0	0	0	0	0	7	6	1	1	7	6	1	1	1677	357	41	0	357	41	0	0	0	0	152.45	32.5	3.73	0	0.37	0.0187	0	0
BPPHS	1986	130	30	0	100	0	0	30	0	0	198.6	13	3	0	0.145	0.00915	0	3	0	0	0.2	0	1	3	3	1	1	2	2	0	0	1986	130	30	0	100	0	0	30	0	0	198.6	13	3	0	0.145	0.00915	0	3
BPPM2	3126	0	38	0	0	38	0	0	0	0	148.86	0	1.81	0	0	0.0115	0	0	0	0	NaN	NaN	0	0	0	1	1	0	0	1	1	3126	0	38	0	0	38	0	0	0	0	148.86	0	1.81	0	0	0.0115	0	0
BPPRD	4863	195	155	0	189	149	0	6	0	0	162.1	6.5	5.17	0	0.0361	0.0423	0	0.2	0	0	0.0268	0	0.0319	4	2	4	4	4	2	4	4	4809	195	155	0	189	149	0	6	0	0	165.83	6.72	5.34	0	0.0374	0.0438	0	0.207
BPSPB	38336	428	1058	0	376	1006	0	52	0	0	207.22	2.31	5.72	0	0.00602	0.0172	0	0.281	0	0	0.126	0	0.0837	8	6	27	12	7	5	25	11	38336	428	1058	0	376	1006	0	52	0	0	207.22	2.31	5.72	0	0.00602	0.0172	0	0.281
BPT4	53409	818	675	0	799	656	0	19	0	0	195.64	3	2.47	0	0.0118	0.0105	0	0.0696	0	0	0.0487	0	0.0487	19	13	16	13	18	12	15	12	52661	818	675	0	799	656	0	19	0	0	197.23	3.06	2.53	0	0.0121	0.0107	0	0.0712
BPT5	32457	542	479	0	513	450	0	29	0	0	200.35	3.35	2.96	0	0.0152	0.0104	0	0.179	0	0	0.0853	0	0.0767	10	10	11	7	9	9	10	6	32287	542	479	0	513	450	0	29	0	0	200.54	3.37	2.98	0	0.0153	0.0105	0	0.18
BPT7	12933	572	148	0	510	86	0	62	0	0	230.95	10.2	2.64	0	0.0682	0.0199	0	1.11	0	0	0.065	0	0.276	10	9	4	3	10	9	2	2	12458	572	148	0	510	86	0	62	0	0	230.7	10.6	2.74	0	0.0707	0.0207	0	1.15
BPV3	2462	320	0	0	320	0	0	0	0	0	307.75	40	0	0	0.15	0	0	0	0	0	0	0	NaN	3	3	0	0	3	3	0	0
BPV5	2305	107	0	0	107	0	0	0	0	0	384.17	17.8	0	0	0.0436	0	0	0	0	0	0	0	NaN	2	1	0	0	2	1	0	0
BRADI	12772608	1448682	166442	0	1418600	136360	0	30082	0	0	426.58	48.4	5.56	0	0.114	0.0118	0	1	0	0	0.0187	0	0.213	20035	11172	3290	2176	19660	11071	2582	1670	6782649	979045	104002	0	959868	84825	0	19177	0	0	433.29	62.5	6.64	0	0.145	0.0132	0	1.23
BRAFL	13248417	1883249	242319	15712	1795176	169488	470	72831	15242	0	464.14	66	8.49	0.55	0.119	0.0168	0.00139	2.55	0.534	0	0.0387	0.0098	0.278	20635	9804	4517	2719	19760	9520	3140	2036	8904304	1556777	185282	9326	1488861	126410	282	58872	9044	0	533.06	93.2	11.1	0.558	0.155	0.02	0.00111	3.52
BRAJA	2616478	71749	15912	0	69929	14092	0	1820	0	0	317.03	8.69	1.93	0	0.0316	0.00551	0	0.221	0	0	0.0168	0	0.086	1223	933	388	288	1196	924	345	261	2257987	65979	14197	0	64378	12596	0	1601	0	0	316.91	9.26	1.99	0	0.0332	0.00578	0	0.225
BRV1	13577	102	0	0	102	0	0	0	0	0	2262.83	17	0	0	0.102	0	0	0	0	0	0	0	NaN	1	1	0	0	1	1	0	0
BSMV	3148	207	30	0	207	30	0	0	0	0	449.71	29.6	4.29	0	0.0704	0.028	0	0	0	0	0	0	0	2	2	1	1	2	2	1	1
BSNV	2075	390	0	0	390	0	0	0	0	0	691.67	130	0	0	0.228	0	0	0	0	0	0	0	NaN	9	3	0	0	9	3	0	0
BSTV1	3093	42	34	0	42	34	0	0	0	0	3093	42	34	0	0.0136	0.011	0	0	0	0	0	0	0	1	1	1	1	1	1	1	1
BTV10	6470	451	132	0	410	91	0	41	0	0	588.18	41	12	0	0.123	0.0291	0	3.73	0	0	0.0742	0	0.456	6	3	4	3	6	3	2	1	6145	288	102	0	264	78	0	24	0	0	614.5	28.8	10.2	0	0.0855	0.0228	0	2.4
BUCAI	188274	455	480	0	425	450	0	30	0	0	329.15	0.795	0.839	0	0.00299	0.0038	0	0.0524	0	0	0.0852	0	0.0769	10	8	14	13	9	7	13	12	187955	455	480	0	425	450	0	30	0	0	329.75	0.798	0.842	0	0.003	0.00382	0	0.0526
BUNL8	4031	0	0	0	0	0	0	0	0	0	1007.75	0	0	0	0	0	0	0	0	0	NaN	NaN	NaN	0	0	0	0	0	0	0	0
BUNYW	4005	0	0	0	0	0	0	0	0	0	1001.25	0	0	0	0	0	0	0	0	0	NaN	NaN	NaN	0	0	0	0	0	0	0	0
BURPS	1988282	56682	10273	299	55366	9214	42	1059	257	0	347.78	9.91	1.8	0.0523	0.0307	0.00535	0.000104	0.185	0.045	0	0.0148	0.00529	0.0635	916	679	252	191	896	669	223	179	1757764	53304	9045	299	52091	8089	42	956	257	0	343.78	10.4	1.77	0.0585	0.0326	0.00521	0.000116	0.187
BVDVN	3988	76	0	0	76	0	0	0	0	0	3988	76	0	0	0.0191	0	0	0	0	0	0	0	NaN	2	1	0	0	2	1	0	0
BVY3	3491	185	0	0	185	0	0	0	0	0	3491	185	0	0	0.053	0	0	0	0	0	0	0	NaN	2	1	0	0	2	1	0	0
BYDVP	1988	332	37	0	332	37	0	0	0	0	331.33	55.3	6.17	0	0.173	0.00711	0	0	0	0	0	0	0	7	3	1	1	7	3	1	1
BYVU	5076	33	0	0	33	0	0	0	0	0	634.5	4.12	0	0	0.00133	0	0	0	0	0	0	0	NaN	1	1	0	0	1	1	0	0
CAEBR	8656306	1179814	162685	23536	1111412	116980	837	45703	22697	0	398.91	54.4	7.5	1.08	0.118	0.0148	0.00309	2.11	1.05	0	0.0357	0.0143	0.279	13650	7042	3155	1939	13027	6842	2246	1402	7176768	1061092	142698	10483	1010950	102483	554	40213	9927	0	424.11	62.7	8.43	0.619	0.126	0.0162	0.00157	2.38
CAEEL	11023695	1565326	219057	25841	1470005	148893	682	70162	25157	0	438.27	62.2	8.71	1.03	0.114	0.0146	0.00299	2.79	1	0	0.037	0.0137	0.31	17574	8327	4068	2327	16836	8097	2830	1634	6735548	940308	128194	9379	894372	91334	301	36858	9076	0	430.17	60.1	8.19	0.599	0.116	0.0152	0.00157	2.35
CAEJA	10583859	1360699	198949	29531	1281645	148951	475	49998	29056	0	301.85	38.8	5.67	0.842	0.12	0.0145	0.00274	1.43	0.829	0	0.0328	0.0135	0.255	17295	10448	3891	2680	16584	10133	2915	1982	5945410	850980	113876	9416	810522	82745	89	31131	9327	0	346.41	49.6	6.63	0.549	0.127	0.0147	0.00156	1.81
CALJA	21481571	3668500	665610	63183	3492369	551960	658	113609	62484	3	511.3	87.3	15.8	1.5	0.146	0.0257	0.00173	2.7	1.49	7.14e-05	0.0326	0.00736	0.199	43794	18770	11137	5564	42063	18377	9262	4519	7946020	1485747	225840	21029	1426873	187789	206	38051	20823	0	545.71	102	15.5	1.44	0.161	0.0221	0.00162	2.61
CAMJE	507643	4254	6148	0	3929	5823	0	325	0	0	312.78	2.62	3.79	0	0.0122	0.0141	0	0.2	0	0	0.0681	0	0.0481	72	56	141	116	68	54	134	111	493410	4058	5972	0	3733	5647	0	325	0	0	311.69	2.56	3.77	0	0.0121	0.0143	0	0.205
CAMVS	2303	249	37	0	249	37	0	0	0	0	383.83	41.5	6.17	0	0.0821	0.0388	0	0	0	0	0	0	0	4	2	1	1	4	2	1	1
CANAL	3836333	580509	57617	57	565191	42299	57	15318	0	0	421.16	63.7	6.33	0.00626	0.119	0.0122	4.57e-05	1.68	0	0	0.0274	0.000552	0.295	6620	3224	1154	813	6512	3182	806	566	2934833	442974	44689	0	431529	33244	0	11445	0	0	420.7	63.5	6.41	0	0.116	0.012	0	1.64
CANFA	15284263	2862921	475545	47797	2732009	392017	409	83524	47384	0	578.49	108	18	1.81	0.162	0.0243	0.00174	3.16	1.79	0	0.0304	0.0061	0.212	31912	12863	7737	3574	30713	12651	6402	2882	8119522	1706155	236097	19285	1646252	195348	127	40745	19154	0	581.59	122	16.9	1.38	0.191	0.0226	0.00145	2.92
CARMS	1256	40	0	0	40	0	0	0	0	0	314	10	0	0	0.164	0	0	0	0	0	0	0	NaN	1	1	0	0	1	1	0	0
CAUCR	1205709	33819	6779	0	33236	6196	0	583	0	0	324.12	9.09	1.82	0	0.0396	0.00566	0	0.157	0	0	0.0174	0	0.0809	561	427	160	125	548	421	144	115	1139715	32799	6382	0	32238	5821	0	561	0	0	322.96	9.29	1.81	0	0.0402	0.00575	0	0.159
CAVC1	786	197	0	0	197	0	0	0	0	0	262	65.7	0	0	0.39	0	0	0	0	0	0	0	NaN	4	3	0	0	4	3	0	0
CAVPO	10375650	1531401	276720	28336	1460733	234068	311	42643	28016	0	521.13	76.9	13.9	1.42	0.12	0.0212	0.00151	2.14	1.41	0	0.0287	0.00656	0.175	18960	7990	4816	2376	18288	7856	4099	1977	7159812	1215382	206449	17173	1167199	175272	158	31168	17006	0	558.27	94.8	16.1	1.34	0.142	0.0234	0.00128	2.43
CCHFI	6111	234	0	0	234	0	0	0	0	0	2037	78	0	0	0.0463	0	0	0	0	0	0	0	NaN	1	1	0	0	1	1	0	0
CENSY	623942	26147	2999	191	25321	2364	0	635	191	0	308.58	12.9	1.48	0.0945	0.0408	0.00578	0.000202	0.314	0.0945	0	0.0248	0.00206	0.191	421	255	73	53	417	252	53	41	552340	22246	2730	191	21510	2185	0	545	191	0	303.15	12.2	1.5	0.105	0.0403	0.00567	0.000224	0.299
CFMVN	1872	246	0	0	246	0	0	0	0	0	468	61.5	0	0	0.132	0	0	0	0	0	0	0	NaN	4	3	0	0	4	3	0	0
CHICK	9823606	1456670	312941	31733	1370448	257796	649	55138	31077	0	557.4	82.7	17.8	1.8	0.125	0.0248	0.00182	3.13	1.76	0	0.0368	0.00822	0.21	17937	7490	4969	2434	17171	7329	4166	1959	6509004	1067590	210099	17209	1015150	174349	513	35744	16690	0	573.43	94.1	18.5	1.52	0.139	0.0253	0.00145	3.15
CHIKS	3722	105	0	0	105	0	0	0	0	0	1861	52.5	0	0	0.0421	0	0	0	0	0	0	0	NaN	1	1	0	0	1	1	0	0
CHLAA	1405705	25887	10491	21	25223	9848	0	643	21	0	365.12	6.72	2.72	0.00545	0.0158	0.00741	1.05e-05	0.167	0.00545	0	0.0238	0.000238	0.0404	389	291	234	166	379	283	223	159	1319664	24308	9394	21	23800	8907	0	487	21	0	367.8	6.77	2.62	0.00585	0.0156	0.00725	1.13e-05	0.136
CHLRE	6548670	1080878	127096	114	1052231	98497	66	28599	48	0	456.77	75.4	8.86	0.00795	0.132	0.0161	4.74e-05	1.99	0.00335	0	0.0255	8.28e-05	0.246	14648	6038	2341	1260	14206	5960	1778	968	5809459	1035756	118958	114	1008391	91641	66	27317	48	0	481.91	85.9	9.87	0.00946	0.146	0.0173	5.64e-05	2.27
CHLTE	631563	7060	4805	0	6747	4492	0	313	0	0	280.69	3.14	2.14	0	0.0187	0.00598	0	0.139	0	0	0.0427	0	0.0771	144	123	111	74	137	118	102	69	612798	6920	4675	0	6607	4362	0	313	0	0	280.97	3.17	2.14	0	0.0186	0.00603	0	0.144
CHLTR	312168	6725	3523	0	6532	3330	0	193	0	0	348.79	7.51	3.94	0	0.0221	0.0137	0	0.216	0	0	0.0517	0	0.044	107	61	84	67	102	58	79	63	311200	6725	3523	0	6532	3330	0	193	0	0	349.66	7.56	3.96	0	0.0222	0.0137	0	0.217
CHPVE	3787	31	32	0	31	32	0	0	0	0	1893.5	15.5	16	0	0.0049	0.00506	0	0	0	0	0	0	0	1	1	1	1	1	1	1	1
CILVC	3953	64	0	0	64	0	0	0	0	0	658.83	10.7	0	0	0.0406	0	0	0	0	0	0	0	NaN	1	1	0	0	1	1	0	0
CIOIN	5767451	616765	142244	9519	572588	107305	279	34937	9238	0	333.22	35.6	8.22	0.55	0.103	0.0197	0.00085	2.02	0.534	0	0.051	0.00586	0.235	8217	4623	2460	1387	7616	4452	1910	1092	4787876	574287	121449	5091	539442	91529	166	29920	4925	0	325.64	39.1	8.26	0.346	0.115	0.0208	0.000623	2.03
CIOSA	9644552	717535	219200	41024	633574	175787	463	43400	40548	0	482.13	35.9	11	2.05	0.0958	0.0193	0.00206	2.17	2.03	0	0.0588	0.0106	0.212	9322	5512	3694	1837	8585	5266	3014	1484	3842061	428820	88232	4231	403943	67459	125	20771	4104	0	361.98	40.4	8.31	0.399	0.132	0.0207	0.000601	1.96
CLBVS	2687	31	0	0	31	0	0	0	0	0	895.67	10.3	0	0	0.0285	0	0	0	0	0	0	0	NaN	1	1	0	0	1	1	0	0
CLOAB	1176635	6346	12505	0	5586	11745	0	760	0	0	305.86	1.65	3.25	0	0.00576	0.0102	0	0.198	0	0	0.0907	0	0.0367	114	92	302	216	103	86	287	210	1062185	6058	11435	0	5320	10697	0	738	0	0	303.39	1.73	3.27	0	0.00609	0.0102	0	0.211
CLOBH	1052452	6769	10387	0	5946	9564	0	823	0	0	293.16	1.89	2.89	0	0.00929	0.00935	0	0.229	0	0	0.125	0	0.0663	123	107	242	189	107	92	225	178	954990	6643	9736	0	5820	8913	0	823	0	0	291.87	2.03	2.98	0	0.00995	0.00917	0	0.252
CMVFN	2457	112	0	0	112	0	0	0	0	0	491.4	22.4	0	0	0.0457	0	0	0	0	0	0	0	NaN	3	3	0	0	3	3	0	0
COCIM	4212036	780439	56409	0	760615	36585	0	19824	0	0	433.96	80.4	5.81	0	0.158	0.0107	0	2.04	0	0	0.0213	0	0.355	8867	4338	1110	733	8672	4296	712	468	3936947	759255	53986	0	740309	35040	0	18946	0	0	442.35	85.3	6.07	0	0.165	0.0105	0	2.13
COPC7	6160676	1265951	84499	40	1238401	56989	0	27510	40	0	461.99	94.9	6.34	0.003	0.174	0.0115	4.68e-06	2.06	0.003	0	0.0181	2.61e-05	0.316	13119	6237	1645	1163	12881	6199	1101	777	5181052	1192634	79211	40	1165976	52593	0	26618	40	0	468.7	108	7.17	0.00362	0.195	0.0128	5.65e-06	2.41
COPV6	2357	270	30	0	270	30	0	0	0	0	336.71	38.6	4.29	0	0.188	0.0111	0	0	0	0	0	0	0	3	3	1	1	3	3	1	1
CORGL	958275	29125	5541	236	27289	3900	41	1641	195	0	309.82	9.42	1.79	0.0763	0.0325	0.00567	0.000121	0.531	0.063	0	0.0364	0.00362	0.231	479	365	127	96	445	352	88	73	914103	28188	5291	236	26396	3694	41	1597	195	0	311.56	9.61	1.8	0.0804	0.0333	0.00566	0.000127	0.544
COXBU	512702	5636	4682	0	5205	4251	0	431	0	0	282.48	3.11	2.58	0	0.0216	0.00835	0	0.237	0	0	0.0539	0	0.0914	107	94	107	88	100	90	99	80	500484	5424	4610	0	4993	4179	0	431	0	0	285.5	3.09	2.63	0	0.0195	0.00852	0	0.246
COYMV	2221	279	183	0	279	183	0	0	0	0	740.33	93	61	0	0.0493	0.203	0	0	0	0	0	0	0	4	1	3	3	4	1	3	3
CPMV1	809	0	0	0	0	0	0	0	0	0	809	0	0	0	0	0	0	0	0	0	NaN	NaN	NaN	0	0	0	0	0	0	0	0
CPMVS	4802	0	0	0	0	0	0	0	0	0	960.4	0	0	0	0	0	0	0	0	0	NaN	NaN	NaN	0	0	0	0	0	0	0	0
CPRVZ	473	0	0	0	0	0	0	0	0	0	473	0	0	0	0	0	0	0	0	0	NaN	NaN	NaN	0	0	0	0	0	0	0	0
CPSVP	3537	0	50	0	0	50	0	0	0	0	884.25	0	12.5	0	0	0.00517	0	0	0	0	NaN	NaN	0	0	0	1	1	0	0	1	1
CPVKS	843	35	0	0	35	0	0	0	0	0	421.5	17.5	0	0	0.0549	0	0	0	0	0	0	0	NaN	1	1	0	0	1	1	0	0
CRLVP	3210	0	0	0	0	0	0	0	0	0	1605	0	0	0	0	0	0	0	0	0	NaN	NaN	NaN	0	0	0	0	0	0	0	0
CRPVC	2666	35	0	0	35	0	0	0	0	0	1333	17.5	0	0	0.00988	0	0	0	0	0	0	0	NaN	1	1	0	0	1	1	0	0
CRPVK	2669	342	0	0	342	0	0	0	0	0	333.62	42.8	0	0	0.117	0	0	0	0	0	0	0	NaN	4	3	0	0	4	3	0	0
CRYHO	1757638	134369	27771	40	130582	24024	0	3747	40	0	452.3	34.6	7.15	0.0103	0.0678	0.016	1.19e-05	0.964	0.0103	0	0.0289	8e-05	0.146	1796	975	593	378	1746	957	508	325	1740721	133565	27711	40	129808	23994	0	3717	40	0	454.97	34.9	7.24	0.0105	0.0682	0.0162	1.21e-05	0.972
CRYNJ	3446667	773219	50226	25	754941	31973	0	18253	25	0	535.53	120	7.8	0.00388	0.191	0.0122	3.46e-06	2.84	0.00388	0	0.0206	1.17e-05	0.399	8099	3419	982	630	7961	3402	585	373	3187825	745542	48527	25	727803	30813	0	17714	25	0	543.44	127	8.27	0.00426	0.2	0.0128	3.8e-06	3.02
CSVMV	2541	89	119	0	56	86	0	33	0	0	508.2	17.8	23.8	0	0.013	0.0297	0	6.6	0	0	0.371	0	0.194	1	1	3	2	1	1	2	2
CTFVL	9623	461	65	0	461	65	0	0	0	0	740.23	35.5	5	0	0.0659	0.00717	0	0	0	0	0	0	0	7	5	2	1	7	5	2	1	9286	461	65	0	461	65	0	0	0	0	773.83	38.4	5.42	0	0.0714	0.00777	0	0
CVH22	12928	189	81	0	189	81	0	0	0	0	1616	23.6	10.1	0	0.0607	0.00863	0	0	0	0	0	0	0	2	1	2	1	2	1	2	1
CVHSA	14377	410	77	0	410	77	0	0	0	0	958.47	27.3	5.13	0	0.0502	0.00409	0	0	0	0	0	0	0	6	3	2	1	6	3	2	1	9995	360	77	0	360	77	0	0	0	0	713.93	25.7	5.5	0	0.053	0.00438	0	0
CVMA5	14869	355	70	0	355	70	0	0	0	0	1351.73	32.3	6.36	0	0.0432	0.00116	0	0	0	0	0	0	0	8	3	2	2	8	3	2	2	10401	279	35	0	279	35	0	0	0	0	1040.1	27.9	3.5	0	0.0458	0.000488	0	0
DANRE	20446653	3237384	631165	57476	3025359	476220	395	154944	57080	0	501.82	79.5	15.5	1.41	0.131	0.0256	0.00171	3.8	1.4	0	0.0466	0.00704	0.242	37875	16590	10177	5383	35665	16129	8055	4227	8212303	1612909	260716	21165	1526933	195755	150	64961	21015	0	563.99	111	17.9	1.45	0.158	0.0262	0.00177	4.46
DAPPU	9947364	1309786	178353	14835	1257066	140351	117	38002	14718	0	330.07	43.5	5.92	0.492	0.122	0.0143	0.0015	1.26	0.488	0	0.0271	0.00664	0.227	17202	9361	3582	2363	16679	9185	2777	1804	6738843	982873	121601	7358	950516	96504	98	25097	7260	0	372.93	54.4	6.73	0.407	0.131	0.0141	0.00093	1.39
DEIRA	949308	38667	5986	25	37312	4656	0	1330	25	0	307.72	12.5	1.94	0.0081	0.0444	0.00562	1.92e-05	0.431	0.0081	0	0.0194	0.000699	0.144	639	518	136	101	626	511	112	86	904498	38244	5737	25	36929	4447	0	1290	25	0	307.86	13	1.95	0.00851	0.046	0.00563	2.01e-05	0.439
DEN1W	3392	0	0	0	0	0	0	0	0	0	3392	0	0	0	0	0	0	0	0	0	NaN	NaN	NaN	0	0	0	0	0	0	0	0
DESVH	1075413	37862	9725	32	36722	8617	0	1108	32	0	305.78	10.8	2.77	0.0091	0.0381	0.00819	3.27e-05	0.315	0.0091	0	0.0254	0.000263	0.0643	605	481	234	174	579	472	204	165	1014195	37031	8705	32	36163	7869	0	836	32	0	305.76	11.2	2.62	0.00965	0.0398	0.00809	3.47e-05	0.252
DHBVQ	1685	455	0	0	455	0	0	0	0	0	421.25	114	0	0	0.278	0	0	0	0	0	0	0	NaN	6	4	0	0	6	4	0	0
DICDI	6860265	1299902	122974	318	1255555	78943	2	44031	316	0	538.31	102	9.65	0.025	0.15	0.0153	1.88e-05	3.46	0.0248	0	0.031	0.000109	0.389	12546	5610	2414	1559	12365	5547	1428	946	5823568	1251487	118014	318	1208495	75338	2	42676	316	0	563.32	121	11.4	0.0308	0.171	0.0172	2.32e-05	4.13
DICTD	571687	754	5573	0	754	5573	0	0	0	0	327.99	0.433	3.2	0	0.00262	0.00905	0	0	0	0	0	0	0	16	15	124	86	16	15	124	86	538801	754	5440	0	754	5440	0	0	0	0	326.35	0.457	3.29	0	0.00276	0.00932	0	0
DPV83	51100	684	145	0	621	82	0	63	0	0	309.7	4.15	0.879	0	0.018	0.00494	0	0.382	0	0	0.0791	0	0.466	13	9	4	4	12	9	2	2	51100	684	145	0	621	82	0	63	0	0	309.7	4.15	0.879	0	0.018	0.00494	0	0.382
DROME	12848190	3057647	308131	6109	2977323	233844	72	74287	6037	0	651.5	155	15.6	0.31	0.177	0.0181	0.000325	3.77	0.306	0	0.0265	0.00119	0.297	32235	9800	5705	2621	31444	9705	4253	1888	6765333	1529618	132651	2043	1494971	100004	43	32647	2000	0	563.97	128	11.1	0.17	0.169	0.0158	0.000186	2.72
DROPS	8423158	1875074	158185	4603	1827700	115182	232	43003	4371	0	502.7	112	9.44	0.275	0.179	0.0143	0.000355	2.57	0.261	0	0.0225	0.00129	0.299	20576	7687	3024	1676	20140	7617	2136	1178	6729491	1570576	125463	1933	1535876	92518	178	32945	1755	0	522.68	122	9.74	0.15	0.191	0.0144	0.000231	2.56
DUGBA	6070	170	0	0	170	0	0	0	0	0	2023.33	56.7	0	0	0.0197	0	0	0	0	0	0	0	NaN	2	2	0	0	2	2	0	0
DXV96	2266	279	0	0	279	0	0	0	0	0	755.33	93	0	0	0.26	0	0	0	0	0	0	0	NaN	4	3	0	0	4	3	0	0
EAVBU	4311	166	0	0	166	0	0	0	0	0	538.88	20.8	0	0	0.0778	0	0	0	0	0	0	0	NaN	3	2	0	0	3	2	0	0
EBLV1	3602	54	30	0	54	30	0	0	0	0	720.4	10.8	6	0	0.0362	0.0201	0	0	0	0	0	0	0	1	1	1	1	1	1	1	1
EBLV2	3601	93	0	0	93	0	0	0	0	0	720.2	18.6	0	0	0.0626	0	0	0	0	0	0	0	NaN	2	1	0	0	2	1	0	0
EBOZM	5494	623	65	0	623	65	0	0	0	0	610.44	69.2	7.22	0	0.111	0.0159	0	0	0	0	0	0	0	7	6	2	2	7	6	2	2
EBVA8	40146	7867	182	0	7790	105	0	77	0	0	501.82	98.3	2.27	0	0.181	0.00556	0	0.963	0	0	0.01	0	0.421	73	38	5	5	73	38	2	2	39801	7673	145	0	7631	103	0	42	0	0	503.81	97.1	1.84	0	0.176	0.00427	0	0.532
EBVB9	55127	17441	182	0	17364	105	0	77	0	0	467.18	148	1.54	0	0.331	0.00377	0	0.653	0	0	0.00574	0	0.421	121	67	5	5	119	67	2	2	42753	9810	145	0	9768	103	0	42	0	0	491.41	113	1.67	0	0.217	0.00388	0	0.483
ECOLI	1355945	13891	9299	0	13211	8619	0	680	0	0	315.12	3.23	2.16	0	0.0114	0.00826	0	0.158	0	0	0.0363	0	0.0454	224	179	222	180	221	175	212	171	1224993	13470	8248	0	12790	7568	0	680	0	0	314.58	3.46	2.12	0	0.012	0.00751	0	0.175
EHV2	36509	4899	142	0	4899	142	0	0	0	0	474.14	63.6	1.84	0	0.117	0.00124	0	0	0	0	0	0	0	45	27	4	2	45	27	4	2	36173	4693	142	0	4693	142	0	0	0	0	475.96	61.8	1.87	0	0.111	0.00125	0	0
EMARV	3485	0	31	0	0	31	0	0	0	0	871.25	0	7.75	0	0	0.00338	0	0	0	0	NaN	NaN	0	0	0	1	1	0	0	1	1
EMCVR	2420	0	39	0	0	39	0	0	0	0	1210	0	19.5	0	0	0.00851	0	0	0	0	NaN	NaN	0	0	0	1	1	0	0	1	1
EMENI	5089040	791585	60350	170	769310	38245	0	22105	170	0	482.14	75	5.72	0.0161	0.139	0.0101	3.73e-05	2.09	0.0161	0	0.023	9.64e-05	0.359	8839	4354	1191	813	8670	4316	744	518	4616803	777790	58474	170	756434	37288	0	21186	170	0	485.01	81.7	6.14	0.0179	0.151	0.0107	4.13e-05	2.23
ENCCU	692194	23779	10949	0	22771	9941	0	1008	0	0	344.72	11.8	5.45	0	0.0367	0.0143	0	0.502	0	0	0.0347	0	0.119	356	267	239	155	346	264	213	135	657181	20743	9949	0	20086	9292	0	657	0	0	345.7	10.9	5.23	0	0.0344	0.0141	0	0.346
ENTFA	953522	23218	12058	85	20748	9673	0	2385	85	0	294.3	7.17	3.72	0.0262	0.0209	0.0105	9.21e-05	0.736	0.0262	0	0.0513	0.00351	0.105	325	240	248	176	308	234	214	161	865009	18872	10376	85	17280	8869	0	1507	85	0	293.52	6.4	3.52	0.0288	0.0195	0.0103	0.000101	0.511
ENTHI	3380165	191506	86934	0	169414	64842	0	22092	0	0	424.7	24.1	10.9	0	0.0585	0.0247	0	2.78	0	0	0.0845	0	0.192	2425	1634	1606	1059	2195	1538	1289	868	2705099	161016	77290	0	140820	57094	0	20196	0	0	448.53	26.7	12.8	0	0.0599	0.0277	0	3.35
FCVUR	2537	0	0	0	0	0	0	0	0	0	845.67	0	0	0	0	0	0	0	0	0	NaN	NaN	NaN	0	0	0	0	0	0	0	0
FDVS	9186	189	84	0	189	84	0	0	0	0	765.5	15.8	7	0	0.0167	0.00828	0	0	0	0	0	0	0	3	2	1	1	3	2	1	1	9186	189	84	0	189	84	0	0	0	0	765.5	15.8	7	0	0.0167	0.00828	0	0
FIPV	9371	174	0	0	174	0	0	0	0	0	937.1	17.4	0	0	0.0351	0	0	0	0	0	0	0	NaN	2	2	0	0	2	2	0	0	9371	174	0	0	174	0	0	0	0	0	937.1	17.4	0	0	0.0351	0	0	0
FLAPJ	805943	5287	6562	0	4173	5448	0	1114	0	0	333.03	2.18	2.71	0	0.00642	0.00794	0	0.46	0	0	0.0768	0	0.0578	91	68	143	108	80	64	130	103	783362	5103	6481	0	3989	5367	0	1114	0	0	334.77	2.18	2.77	0	0.00647	0.00809	0	0.476
FOWPN	80735	1442	487	0	1442	487	0	0	0	0	321.65	5.75	1.94	0	0.0129	0.00645	0	0	0	0	0	0	0	22	11	10	10	22	11	10	10	74901	1274	453	0	1274	453	0	0	0	0	305.72	5.2	1.85	0	0.0128	0.00653	0	0
FRATT	473408	2777	3320	0	2496	3039	0	281	0	0	309.82	1.82	2.17	0	0.00934	0.00811	0	0.184	0	0	0.0783	0	0.0562	54	48	80	70	50	45	73	65	465207	2777	3252	0	2496	2971	0	281	0	0	310.34	1.85	2.17	0	0.00952	0.00818	0	0.187
FRG3G	28355	2938	60	45	2893	60	0	0	45	0	289.34	30	0.612	0.459	0.114	0.00318	0.0085	0	0.459	0	0	0.0309	0	42	27	2	2	41	26	2	2	28355	2938	60	45	2893	60	0	0	45	0	289.34	30	0.612	0.459	0.114	0.00318	0.0085	0
FUSNN	641087	3212	6856	0	2910	6554	0	302	0	0	313.34	1.57	3.35	0	0.00654	0.0124	0	0.148	0	0	0.0955	0	0.0318	64	52	161	124	58	47	155	121	596044	3009	6410	0	2707	6108	0	302	0	0	312.88	1.58	3.36	0	0.00697	0.0121	0	0.159
GAHVM	42491	3659	121	0	3621	83	0	38	0	0	472.12	40.7	1.34	0	0.082	0.00193	0	0.422	0	0	0.0121	0	0.365	41	21	3	2	41	21	2	1	42102	3585	121	0	3547	83	0	38	0	0	483.93	41.2	1.39	0	0.0792	0.002	0	0.437
GASAC	13490632	1815853	376378	45453	1685318	290974	322	85404	45131	0	495.11	66.6	13.8	1.67	0.121	0.0229	0.00168	3.13	1.66	0	0.0416	0.00794	0.216	22727	10723	6264	3286	21320	10460	5044	2648	6849569	1168783	195548	19833	1102417	148887	128	46661	19705	0	520.88	88.9	14.9	1.51	0.16	0.0229	0.00152	3.55
GEOSL	1142096	15136	11664	0	14223	10751	0	913	0	0	335.71	4.45	3.43	0	0.0158	0.00947	0	0.268	0	0	0.0556	0	0.0415	263	222	269	204	241	208	250	198	1065464	13995	10365	0	13324	9694	0	671	0	0	336.21	4.42	3.27	0	0.0159	0.00928	0	0.212
GFKVM	2645	454	0	0	454	0	0	0	0	0	661.25	114	0	0	0.385	0	0	0	0	0	0	0	NaN	5	3	0	0	5	3	0	0
GIAIC	3226528	218150	108568	36	209908	100326	36	8242	0	0	451.01	30.5	15.2	0.00503	0.0663	0.0223	9.93e-06	1.15	0	0	0.0322	0.000486	0.0846	3604	1763	1944	793	3433	1727	1782	735	3003904	211561	106547	36	203421	98407	36	8140	0	0	465.58	32.8	16.5	0.00558	0.0673	0.0239	1.1e-05	1.26
GIBZE	5835308	950940	69286	85	922776	41176	31	28110	54	0	445.31	72.6	5.29	0.00649	0.143	0.0104	2.99e-05	2.15	0.00412	0	0.0229	0.000288	0.349	10155	5275	1394	961	9921	5222	845	616	5411408	937162	68330	85	909077	40299	31	28031	54	0	446.78	77.4	5.64	0.00702	0.152	0.011	3.23e-05	2.31
GLOVI	1377677	30467	12187	0	29380	11100	0	1087	0	0	312.68	6.91	2.77	0	0.0247	0.01	0	0.247	0	0	0.0493	0	0.0773	470	377	287	228	444	358	255	204	1172232	28174	9619	0	27355	8800	0	819	0	0	306.63	7.37	2.52	0	0.0264	0.00886	0	0.214
GLRV3	7560	424	0	0	424	0	0	0	0	0	581.54	32.6	0	0	0.0132	0	0	0	0	0	0	0	NaN	4	2	0	0	4	2	0	0	5327	212	0	0	212	0	0	0	0	0	443.92	17.7	0	0	0.00637	0	0	0
GLVWB	2793	114	0	0	114	0	0	0	0	0	1396.5	57	0	0	0.0471	0	0	0	0	0	0	0	NaN	2	2	0	0	2	2	0	0
GORGO	14626901	2511467	431118	41323	2396757	357215	498	73885	40807	0	536.06	92	15.8	1.51	0.145	0.0232	0.0015	2.71	1.5	0	0.03	0.00609	0.2	29544	12240	7073	3477	28443	12025	5871	2829	7902214	1498813	223125	21044	1440438	185556	238	37569	20806	0	537.42	102	15.2	1.43	0.16	0.0211	0.00143	2.56
GRVMC	1350	233	0	0	233	0	0	0	0	0	450	77.7	0	0	0.308	0	0	0	0	0	0	0	NaN	3	2	0	0	3	2	0	0
GVAIS	2450	0	0	0	0	0	0	0	0	0	490	0	0	0	0	0	0	0	0	0	NaN	NaN	NaN	0	0	0	0	0	0	0	0
GVCPM	36936	1330	1023	0	1209	902	0	121	0	0	258.29	9.3	7.15	0	0.0491	0.0236	0	0.846	0	0	0.0745	0	0.133	17	15	19	11	15	14	18	10	36672	1330	1023	0	1209	902	0	121	0	0	260.09	9.43	7.26	0	0.0498	0.0239	0	0.858
HAEIN	527691	5466	4706	0	4661	3901	0	805	0	0	309.13	3.2	2.76	0	0.00948	0.0101	0	0.472	0	0	0.133	0	0.111	87	68	110	82	75	61	92	72	514348	5213	4638	0	4408	3833	0	805	0	0	308.92	3.13	2.79	0	0.00952	0.0102	0	0.483
HALSA	680106	46298	8589	0	42458	4749	0	3840	0	0	280.34	19.1	3.54	0	0.0736	0.00947	0	1.58	0	0	0.0454	0	0.378	842	587	173	100	786	572	86	67	631111	43183	7803	0	39741	4361	0	3442	0	0	281.37	19.3	3.48	0	0.0735	0.00906	0	1.53
HANTV	3715	0	35	0	0	35	0	0	0	0	1238.33	0	11.7	0	0	0.0272	0	0	0	0	NaN	NaN	0	0	0	1	1	0	0	1	1
HASV	2508	378	0	0	378	0	0	0	0	0	836	126	0	0	0.309	0	0	0	0	0	0	0	NaN	7	3	0	0	7	3	0	0
HASV1	3157	294	62	0	294	62	0	0	0	0	1052.33	98	20.7	0	0.107	0.0182	0	0	0	0	0	0	0	4	3	2	2	4	3	2	2
HAVHM	2227	0	0	0	0	0	0	0	0	0	2227	0	0	0	0	0	0	0	0	0	NaN	NaN	NaN	0	0	0	0	0	0	0	0
HBVCJ	1792	234	0	0	234	0	0	0	0	0	358.4	46.8	0	0	0.151	0	0	0	0	0	0	0	NaN	4	4	0	0	4	4	0	0
HCMVM	63402	7610	255	0	7547	192	0	63	0	0	377.39	45.3	1.52	0	0.0955	0.00288	0	0.375	0	0	0.00506	0	0.201	94	61	7	6	94	61	5	5	62392	7474	255	0	7411	192	0	63	0	0	375.86	45	1.54	0	0.0956	0.00291	0	0.38
HCVH	3173	232	0	0	232	0	0	0	0	0	1586.5	116	0	0	0.135	0	0	0	0	0	0	0	NaN	6	2	0	0	6	2	0	0
HDVD3	409	315	64	0	313	62	0	2	0	0	204.5	158	32	0	0.77	0.157	0	1	0	0	0.00637	0	0.0312	2	2	2	2	2	2	2	2
HELPY	491826	8600	8289	0	7399	7088	0	1201	0	0	316.69	5.54	5.34	0	0.0194	0.0187	0	0.773	0	0	0.108	0	0.114	113	96	189	147	105	90	163	131	468765	8133	7772	0	7053	6692	0	1080	0	0	313.98	5.45	5.21	0	0.0194	0.0185	0	0.723
HENDH	6056	1331	63	0	1331	63	0	0	0	0	672.89	148	7	0	0.284	0.0128	0	0	0	0	0	0	0	8	4	2	1	8	4	2	1
HEVCH	2467	108	0	0	108	0	0	0	0	0	822.33	36	0	0	0.0425	0	0	0	0	0	0	0	NaN	2	2	0	0	2	2	0	0
HHV11	38368	6814	163	37	6777	163	0	0	37	0	525.59	93.3	2.23	0.507	0.204	0.00178	0.00162	0	0.507	0	0	0.00491	0	80	48	5	3	80	48	5	3	38368	6814	163	37	6777	163	0	0	37	0	525.59	93.3	2.23	0.507	0.204	0.00178	0.00162	0
HHV2H	39568	7423	103	0	7423	103	0	0	0	0	534.7	100	1.39	0	0.192	0.0027	0	0	0	0	0	0	0	77	49	3	3	77	49	3	3	38743	6837	103	0	6837	103	0	0	0	0	530.73	93.7	1.41	0	0.185	0.00273	0	0
HHV6U	44715	3865	181	0	3842	158	0	23	0	0	434.13	37.5	1.76	0	0.0749	0.00219	0	0.223	0	0	0.0115	0	0.164	38	19	5	4	38	19	4	3	43605	3197	181	0	3174	158	0	23	0	0	436.05	32	1.81	0	0.0691	0.00225	0	0.23
HHV6Z	43610	3789	177	0	3764	152	0	25	0	0	449.59	39.1	1.82	0	0.0817	0.00266	0	0.258	0	0	0.0132	0	0.135	44	18	5	5	44	18	4	4	43610	3789	177	0	3764	152	0	25	0	0	449.59	39.1	1.82	0	0.0817	0.00266	0	0.258
HHV8P	38742	4602	318	0	4386	102	0	216	0	0	450.49	53.5	3.7	0	0.0958	0.0065	0	2.51	0	0	0.0087	0	0.25	44	25	4	4	45	25	3	3	38360	4487	318	0	4271	102	0	216	0	0	456.67	53.4	3.79	0	0.0934	0.00665	0	2.57
HIS1I	4432	173	38	0	143	8	0	30	0	0	126.63	4.94	1.09	0	0.0475	0.0103	0	0.857	0	0	0.116	0	0.789	4	3	1	1	3	3	0	0	4432	173	38	0	143	8	0	30	0	0	126.63	4.94	1.09	0	0.0475	0.0103	0	0.857
HMPVC	4142	281	37	0	281	37	0	0	0	0	460.22	31.2	4.11	0	0.127	0.00763	0	0	0	0	0	0	0	4	2	1	1	4	2	1	1
HORSE	12750829	1875729	448216	51815	1749247	373113	429	75096	51379	0	562.28	82.7	19.8	2.28	0.12	0.0321	0.00204	3.31	2.27	0	0.0489	0.00886	0.191	22129	9055	7089	3652	20991	8773	5987	3010	7136019	1267471	222178	18101	1211539	184161	179	38010	17915	0	560.88	99.6	17.5	1.42	0.15	0.0253	0.00133	2.99
HPBVH	1310	140	0	0	140	0	0	0	0	0	436.67	46.7	0	0	0.172	0	0	0	0	0	0	0	NaN	2	2	0	0	2	2	0	0
HPE2W	2179	38	0	0	38	0	0	0	0	0	2179	38	0	0	0.0174	0	0	0	0	0	0	0	NaN	1	1	0	0	1	1	0	0
HPV04	2459	244	0	0	244	0	0	0	0	0	351.29	34.9	0	0	0.123	0	0	0	0	0	0	0	NaN	3	3	0	0	3	3	0	0
HPV05	2827	651	0	0	651	0	0	0	0	0	353.38	81.4	0	0	0.237	0	0	0	0	0	0	0	NaN	6	5	0	0	6	5	0	0
HPV16	2452	158	0	0	158	0	0	0	0	0	306.5	19.8	0	0	0.0802	0	0	0	0	0	0	0	NaN	4	3	0	0	4	3	0	0
HPV1A	2408	204	0	0	204	0	0	0	0	0	301	25.5	0	0	0.162	0	0	0	0	0	0	0	NaN	2	2	0	0	2	2	0	0
HPV41	2763	247	0	0	247	0	0	0	0	0	251.18	22.5	0	0	0.0967	0	0	0	0	0	0	0	NaN	4	3	0	0	4	3	0	0	2763	247	0	0	247	0	0	0	0	0	251.18	22.5	0	0	0.0967	0	0	0
HRSVB	4540	270	36	0	270	36	0	0	0	0	412.73	24.5	3.27	0	0.0877	0.0057	0	0	0	0	0	0	0	4	2	1	1	4	2	1	1	4540	270	36	0	270	36	0	0	0	0	412.73	24.5	3.27	0	0.0877	0.0057	0	0
HRV8A	2164	0	0	0	0	0	0	0	0	0	2164	0	0	0	0	0	0	0	0	0	NaN	NaN	NaN	0	0	0	0	0	0	0	0
HTL1C	4121	640	93	0	587	40	0	53	0	0	457.89	71.1	10.3	0	0.207	0.0494	0	5.89	0	0	0.0789	0	0.57	10	6	2	1	9	6	1	1
HTL32	3469	62	0	0	62	0	0	0	0	0	578.17	10.3	0	0	0.0568	0	0	0	0	0	0	0	NaN	1	1	0	0	1	1	0	0
HTLV2	3483	307	0	0	307	0	0	0	0	0	580.5	51.2	0	0	0.154	0	0	0	0	0	0	0	NaN	8	4	0	0	8	4	0	0
HUMAN	23391368	4013403	679488	53359	3841856	560752	548	118736	52811	0	339.32	58.2	9.86	0.774	0.143	0.0205	0.00108	1.72	0.766	0	0.0288	0.00504	0.205	48763	24057	11746	6210	46891	23603	9619	4991	8764696	1741657	250880	21038	1677001	207022	240	43858	20798	0	456.14	90.6	13.1	1.09	0.164	0.0182	0.00125	2.28
HV19S	1607	207	0	0	207	0	0	0	0	0	803.5	104	0	0	0.134	0	0	0	0	0	0	0	NaN	1	1	0	0	1	1	0	0
HV1H2	3550	321	192	0	269	140	0	52	0	0	394.44	35.7	21.3	0	0.128	0.0246	0	5.78	0	0	0.109	0	0.366	8	4	5	3	6	4	3	2
HV2BE	3836	517	50	0	517	50	0	0	0	0	426.22	57.4	5.56	0	0.244	0.00646	0	0	0	0	0	0	0	9	5	1	1	9	5	1	1
HYPBU	449830	1651	4022	0	1651	4022	0	0	0	0	280.79	1.03	2.51	0	0.00511	0.00976	0	0	0	0	0	0	0	39	38	82	64	39	38	82	64	436943	1651	3958	0	1651	3958	0	0	0	0	280.45	1.06	2.54	0	0.00525	0.00982	0	0
I34A1	4788	63	41	0	63	41	0	0	0	0	399	5.25	3.42	0	0.00694	0.00605	0	0	0	0	0	0	0	1	1	1	1	1	1	1	1	4536	63	41	0	63	41	0	0	0	0	412.36	5.73	3.73	0	0.00757	0.0066	0	0
I96A0	4809	94	50	0	94	50	0	0	0	0	400.75	7.83	4.17	0	0.0356	0.00734	0	0	0	0	0	0	0	2	2	1	1	2	2	1	1	4557	94	50	0	94	50	0	0	0	0	414.27	8.55	4.55	0	0.0389	0.008	0	0
IBDVU	2040	196	0	0	196	0	0	0	0	0	680	65.3	0	0	0.175	0	0	0	0	0	0	0	NaN	4	3	0	0	4	3	0	0
IBVB	12752	259	0	0	259	0	0	0	0	0	1275.2	25.9	0	0	0.0633	0	0	0	0	0	0	0	NaN	5	1	0	0	5	1	0	0	8801	259	0	0	259	0	0	0	0	0	977.89	28.8	0	0	0.0704	0	0	0
ICHVA	33924	3123	740	0	3059	676	0	64	0	0	446.37	41.1	9.74	0	0.086	0.0118	0	0.842	0	0	0.0105	0	0.0205	38	21	15	7	36	21	14	7	33696	3123	740	0	3059	676	0	64	0	0	449.28	41.6	9.87	0	0.0872	0.0119	0	0.853
ICRSV	2599	290	0	0	290	0	0	0	0	0	433.17	48.3	0	0	0.0712	0	0	0	0	0	0	0	NaN	4	2	0	0	4	2	0	0
IHNVW	3421	84	41	0	84	41	0	0	0	0	570.17	14	6.83	0	0.0486	0.00344	0	0	0	0	0	0	0	2	2	1	1	2	2	1	1
IIV3	43365	2584	450	0	2584	450	0	0	0	0	344.17	20.5	3.57	0	0.0605	0.0097	0	0	0	0	0	0	0	33	21	11	7	33	21	11	7	43365	2584	450	0	2584	450	0	0	0	0	344.17	20.5	3.57	0	0.0605	0.0097	0	0
IIV6	77551	1763	1605	0	1685	1527	0	78	0	0	165.71	3.77	3.43	0	0.0206	0.0129	0	0.167	0	0	0.0539	0	0.0448	31	22	36	26	29	21	34	24	74706	1763	1270	0	1685	1192	0	78	0	0	164.19	3.87	2.79	0	0.0212	0.0112	0	0.171
INBLE	4718	71	47	0	71	47	0	0	0	0	428.91	6.45	4.27	0	0.0115	0.00732	0	0	0	0	0	0	0	1	1	1	1	1	1	1	1	4718	71	47	0	71	47	0	0	0	0	428.91	6.45	4.27	0	0.0115	0.00732	0	0
INCAA	4259	53	76	0	53	76	0	0	0	0	532.38	6.62	9.5	0	0.0117	0.0134	0	0	0	0	0	0	0	1	1	2	2	1	1	2	2
IPNVJ	1965	195	36	0	190	31	0	5	0	0	655	65	12	0	0.0698	0.0142	0	1.67	0	0	0.0439	0	0.139	4	2	1	1	4	2	1	1
ISAV8	4281	107	64	0	107	64	0	0	0	0	428.1	10.7	6.4	0	0.0457	0.022	0	0	0	0	0	0	0	1	1	2	2	1	1	2	2	4281	107	64	0	107	64	0	0	0	0	428.1	10.7	6.4	0	0.0457	0.022	0	0
IXOSC	5815358	747882	78365	3203	728396	62079	3	16286	3200	0	284.05	36.5	3.83	0.156	0.131	0.00986	0.000264	0.795	0.156	0	0.0207	0.00113	0.218	9509	5764	1531	998	9235	5675	1199	767	5020307	726552	75285	2188	708683	59601	3	15684	2185	0	299.36	43.3	4.49	0.13	0.154	0.0113	0.000259	0.935
JDNVP	1816	193	0	0	193	0	0	0	0	0	454	48.2	0	0	0.0678	0	0	0	0	0	0	0	NaN	3	2	0	0	3	2	0	0
KORCO	475001	848	4674	0	848	4674	0	0	0	0	296.5	0.529	2.92	0	0.00218	0.0114	0	0	0	0	0	0	0	19	16	85	63	19	16	85	63	453960	848	4201	0	848	4201	0	0	0	0	295.74	0.552	2.74	0	0.00228	0.00968	0	0
KORVE	1677413	39822	10022	0	38178	8378	0	1644	0	0	351.59	8.35	2.1	0	0.0261	0.00596	0	0.345	0	0	0.0334	0	0.102	629	489	231	190	594	473	202	173	1560627	38424	9803	0	36780	8159	0	1644	0	0	348.43	8.58	2.19	0	0.0266	0.00624	0	0.367
LACLA	656950	9383	7187	162	8813	6667	112	520	50	0	295.26	4.22	3.23	0.0728	0.013	0.0111	6.29e-05	0.234	0.0225	0	0.0753	0.0391	0.0496	140	111	164	128	125	99	155	123	616564	8959	6857	162	8389	6337	112	520	50	0	298.58	4.34	3.32	0.0785	0.0135	0.0109	6.78e-05	0.252
LACPL	934303	22065	5922	38	21158	5053	0	869	38	0	302.56	7.15	1.92	0.0123	0.0171	0.0056	3.24e-05	0.281	0.0123	0	0.0505	0.00428	0.109	276	202	140	96	260	193	118	85	834847	20890	5635	38	20060	4843	0	792	38	0	301.82	7.55	2.04	0.0137	0.0174	0.00595	3.62e-05	0.286
LAMBD	14272	637	209	0	574	146	0	63	0	0	216.24	9.65	3.17	0	0.0202	0.00956	0	0.955	0	0	0.0738	0	0.282	12	7	6	5	11	7	4	4	14272	637	209	0	574	146	0	63	0	0	216.24	9.65	3.17	0	0.0202	0.00956	0	0.955
LASSJ	3377	0	0	0	0	0	0	0	0	0	844.25	0	0	0	0	0	0	0	0	0	NaN	NaN	NaN	0	0	0	0	0	0	0	0
LATCH	12139710	1532925	389867	30392	1439090	325809	615	64058	29777	0	517.99	65.4	16.6	1.3	0.0993	0.0273	0.00154	2.73	1.27	0	0.046	0.00881	0.18	19176	8174	6416	3404	18146	7924	5416	2819	7006810	1004778	230333	16160	949493	190986	222	39347	15938	0	562.93	80.7	18.5	1.3	0.118	0.0272	0.00148	3.16
LBVAV	3592	107	0	0	107	0	0	0	0	0	598.67	17.8	0	0	0.0536	0	0	0	0	0	0	0	NaN	2	1	0	0	2	1	0	0
LCDV1	459	0	0	0	0	0	0	0	0	0	459	0	0	0	0	0	0	0	0	0	NaN	NaN	NaN	0	0	0	0	0	0	0	0
LDCPR	7701	226	73	0	226	73	0	0	0	0	770.1	22.6	7.3	0	0.0328	0.00688	0	0	0	0	0	0	0	3	3	2	2	3	3	2	2	7701	226	73	0	226	73	0	0	0	0	770.1	22.6	7.3	0	0.0328	0.00688	0	0
LEIBR	5087935	832202	125861	0	798890	92549	0	33312	0	0	627.99	103	15.5	0	0.13	0.0206	0	4.11	0	0	0.0321	0	0.216	11716	3957	2224	979	11253	3889	1725	784	4782972	799610	115507	0	771427	87324	0	28183	0	0	643.48	108	15.5	0	0.135	0.0209	0	3.79
LEIIN	5116889	943641	127716	0	905294	89369	0	38347	0	0	635.88	117	15.9	0	0.146	0.0211	0	4.77	0	0	0.0334	0	0.244	12693	4140	2222	1029	12205	4075	1638	803	4896743	932129	123360	0	896428	87659	0	35701	0	0	647.8	123	16.3	0	0.153	0.0218	0	4.72
LEIMA	5145570	929224	127785	0	892425	90986	0	36799	0	0	639.92	116	15.9	0	0.14	0.0207	0	4.58	0	0	0.0331	0	0.234	12380	4078	2255	1014	11902	4017	1706	814	4906956	918179	124219	0	882712	88752	0	35467	0	0	651.91	122	16.5	0	0.147	0.0216	0	4.71
LEPIN	1159747	11758	8810	0	11317	8369	0	441	0	0	315.49	3.2	2.4	0	0.00991	0.00715	0	0.12	0	0	0.03	0	0.0338	187	150	217	179	181	146	206	171	1086044	11484	7657	0	11043	7216	0	441	0	0	315.16	3.33	2.22	0	0.0102	0.00617	0	0.128
LISMO	870843	11005	8767	0	10150	7912	0	855	0	0	306.2	3.87	3.08	0	0.0114	0.0114	0	0.301	0	0	0.0771	0	0.0774	197	145	206	160	178	134	191	149	811875	10644	8426	0	9789	7571	0	855	0	0	306.14	4.01	3.18	0	0.0115	0.0117	0	0.322
LIYV9	6620	140	0	0	140	0	0	0	0	0	735.56	15.6	0	0	0.0299	0	0	0	0	0	0	0	NaN	4	4	0	0	4	4	0	0
LNYV3	3857	44	0	0	44	0	0	0	0	0	642.83	7.33	0	0	0.0244	0	0	0	0	0	0	0	NaN	1	1	0	0	1	1	0	0
LOLV	2527	233	0	0	233	0	0	0	0	0	421.17	38.8	0	0	0.0603	0	0	0	0	0	0	0	NaN	3	2	0	0	3	2	0	0
LOXAF	13857996	2172382	417107	38977	2061678	345148	230	71958	38746	1	541.01	84.8	16.3	1.52	0.127	0.0234	0.00161	2.81	1.51	3.9e-05	0.034	0.00711	0.198	25980	10740	6707	3281	24810	10509	5653	2675	7265815	1288496	217763	17420	1234444	180993	138	36770	17282	0	557.19	98.8	16.7	1.34	0.149	0.024	0.00141	2.82
LRVLG	1687	0	0	0	0	0	0	0	0	0	562.33	0	0	0	0	0	0	0	0	0	NaN	NaN	NaN	0	0	0	0	0	0	0	0
LYCVA	3356	0	0	0	0	0	0	0	0	0	839	0	0	0	0	0	0	0	0	0	NaN	NaN	NaN	0	0	0	0	0	0	0	0
MABVM	4873	572	60	0	572	60	0	0	0	0	696.14	81.7	8.57	0	0.139	0.0192	0	0	0	0	0	0	0	4	4	2	2	4	4	2	2
MACMU	17042562	2834261	546556	55743	2683267	450757	539	95790	55195	0	479.56	79.8	15.4	1.57	0.137	0.0248	0.00185	2.7	1.55	0	0.0333	0.00734	0.204	33744	14853	8984	4344	32245	14553	7441	3530	7751097	1464633	224670	22091	1404694	186573	240	38088	21842	0	523.12	98.8	15.2	1.49	0.161	0.0221	0.00173	2.57
MBVLF	1454	179	0	0	179	0	0	0	0	0	363.5	44.8	0	0	0.0946	0	0	0	0	0	0	0	NaN	2	2	0	0	2	2	0	0
MCMVK	1769	88	0	0	88	0	0	0	0	0	442.25	22	0	0	0.0864	0	0	0	0	0	0	0	NaN	2	2	0	0	2	2	0	0
MCV1	54465	4373	212	29	4233	101	0	111	29	0	334.14	26.8	1.3	0.178	0.0573	0.00326	0.000326	0.681	0.178	0	0.0107	0.00601	0.383	63	36	5	5	63	36	3	3	54465	4373	212	29	4233	101	0	111	29	0	334.14	26.8	1.3	0.178	0.0573	0.00326	0.000326	0.681
MDBVW	10188	1033	0	0	1033	0	0	0	0	0	192.23	19.5	0	0	0.0596	0	0	0	0	0	0	0	NaN	10	6	0	0	10	6	0	0	6617	593	0	0	593	0	0	0	0	0	183.81	16.5	0	0	0.0619	0	0	0
MEASC	5202	486	96	0	486	96	0	0	0	0	650.25	60.8	12	0	0.163	0.023	0	0	0	0	0	0	0	9	4	2	2	9	4	2	2
MELGA	8776990	1185246	285391	33291	1103594	236593	437	48798	32854	0	530.75	71.7	17.3	2.01	0.11	0.0273	0.00227	2.95	1.99	0	0.0431	0.0107	0.193	14750	6225	4562	2312	14022	6043	3866	1900	5855700	850340	190021	16665	804080	160227	199	29794	16466	0	552.69	80.3	17.9	1.57	0.12	0.0266	0.00164	2.81
MESFL	245043	1313	3111	0	1203	3001	0	110	0	0	358.77	1.92	4.55	0	0.00804	0.0129	0	0.161	0	0	0.0661	0	0.0288	24	21	68	49	21	19	66	48	234038	1313	3047	0	1203	2937	0	110	0	0	354.6	1.99	4.62	0	0.00833	0.0128	0	0.167
METAC	1392324	20522	143	0	20443	64	0	79	0	0	311.62	4.59	0.032	0	0.0147	7.5e-05	0	0.0177	0	0	0.00179	0	0.333	358	296	3	3	357	296	2	2	1101961	18363	143	0	18284	64	0	79	0	0	305	5.08	0.0396	0	0.0167	9.27e-05	0	0.0219
METHJ	996237	12549	9322	0	12147	8920	0	402	0	0	322.72	4.07	3.02	0	0.0105	0.00667	0	0.13	0	0	0.0358	0	0.0599	180	144	214	143	176	141	203	134	888965	11485	8447	0	11158	8120	0	327	0	0	323.73	4.18	3.08	0	0.0109	0.0069	0	0.119
METJA	505150	539	4934	0	450	4845	0	89	0	0	282.68	0.302	2.76	0	0.000921	0.0108	0	0.0498	0	0	0.19	0	0.0314	11	11	110	84	8	8	107	81	480380	539	4810	0	450	4721	0	89	0	0	284.92	0.32	2.85	0	0.000976	0.0111	0	0.0528
METKA	500958	7030	4212	0	6792	3974	0	238	0	0	296.95	4.17	2.5	0	0.0154	0.00943	0	0.141	0	0	0.0401	0	0.0527	130	116	87	71	125	111	82	66	479257	6860	4170	0	6622	3932	0	238	0	0	297.68	4.26	2.59	0	0.0156	0.00954	0	0.148
METTH	524520	3845	3373	0	3741	3269	0	104	0	0	280.64	2.06	1.8	0	0.00866	0.00787	0	0.0556	0	0	0.0323	0	0.0424	71	68	72	62	68	65	69	59	496438	3411	3373	0	3307	3269	0	104	0	0	280	1.92	1.9	0	0.00827	0.0083	0	0.0587
MILVL	3911	0	0	0	0	0	0	0	0	0	558.71	0	0	0	0	0	0	0	0	0	NaN	NaN	NaN	0	0	0	0	0	0	0	0
MIMIV	341649	22011	2130	3111	18855	1914	171	216	2940	0	375.85	24.2	2.34	3.42	0.0513	0.00664	0.00279	0.238	3.23	0	0.0149	0.0295	0.11	233	147	50	45	222	144	44	39	319213	20886	1925	2750	18058	1741	106	184	2644	0	377.32	24.7	2.28	3.25	0.0533	0.00641	0.00247	0.217
MLVMS	2941	613	50	0	613	50	0	0	0	0	980.33	204	16.7	0	0.241	0.0251	0	0	0	0	0	0	0	8	3	1	1	8	3	1	1
MMTVC	4213	344	31	0	344	31	0	0	0	0	842.6	68.8	6.2	0	0.0652	0.00901	0	0	0	0	0	0	0	6	3	1	1	6	3	1	1
MMVR	3750	86	0	0	86	0	0	0	0	0	625	14.3	0	0	0.0409	0	0	0	0	0	0	0	NaN	2	2	0	0	2	2	0	0
MNPVA	2426	439	0	0	439	0	0	0	0	0	404.33	73.2	0	0	0.134	0	0	0	0	0	0	0	NaN	4	3	0	0	4	3	0	0
MOKV	3604	92	0	0	92	0	0	0	0	0	720.8	18.4	0	0	0.0607	0	0	0	0	0	0	0	NaN	2	1	0	0	2	1	0	0
MONBE	5511963	813275	125772	2165	762615	77229	48	48543	2117	0	599.91	88.5	13.7	0.236	0.139	0.0207	0.000137	5.28	0.23	0	0.0491	0.000399	0.335	8786	4086	2261	1233	8281	4002	1433	856	5085434	786024	119670	2165	736735	72498	48	47172	2117	0	609.84	94.3	14.4	0.26	0.147	0.0216	0.000151	5.66
MONDO	11804469	1740000	327700	26162	1656893	270355	390	57335	25762	0	530.78	78.2	14.7	1.18	0.122	0.0235	0.00136	2.58	1.16	0	0.0368	0.0068	0.214	21227	8864	5657	2928	20348	8667	4599	2296	7627795	1373836	222129	18137	1317144	183270	294	38849	17833	0	577.56	104	16.8	1.37	0.153	0.0232	0.00157	2.94
MOOTA	751866	7924	7628	0	7691	7395	0	233	0	0	306.76	3.23	3.11	0	0.0101	0.00941	0	0.0951	0	0	0.0427	0	0.0449	136	109	168	121	127	104	158	113	701521	7855	7405	0	7622	7172	0	233	0	0	307.41	3.44	3.24	0	0.0106	0.00977	0	0.102
MOUSE	19604607	3403337	596194	38892	3250090	481620	216	114571	38673	0	452.93	78.6	13.8	0.899	0.144	0.0225	0.00116	2.65	0.893	0	0.0327	0.00517	0.212	40175	17313	9879	5013	38508	16984	8123	4009	8307074	1626764	240435	18481	1564539	196524	167	43911	18314	0	524.57	103	15.2	1.17	0.163	0.021	0.00119	2.77
MPRVN	8005	142	37	0	142	37	0	0	0	0	727.73	12.9	3.36	0	0.0216	0.00177	0	0	0	0	0	0	0	3	3	1	1	3	3	1	1	8005	142	37	0	142	37	0	0	0	0	727.73	12.9	3.36	0	0.0216	0.00177	0	0
MRFVC	2446	466	0	0	466	0	0	0	0	0	1223	233	0	0	0.384	0	0	0	0	0	0	0	NaN	6	2	0	0	6	2	0	0
MSVS	972	43	0	0	43	0	0	0	0	0	243	10.8	0	0	0.0441	0	0	0	0	0	0	0	NaN	1	1	0	0	1	1	0	0
MUHVS	10487	1581	0	0	1581	0	0	0	0	0	699.13	105	0	0	0.146	0	0	0	0	0	0	0	NaN	14	9	0	0	14	9	0	0	10487	1581	0	0	1581	0	0	0	0	0	699.13	105	0	0	0.146	0	0	0
MUMIP	2754	247	0	0	247	0	0	0	0	0	393.43	35.3	0	0	0.0529	0	0	0	0	0	0	0	NaN	6	4	0	0	6	4	0	0
MUMPM	4977	375	31	0	375	31	0	0	0	0	622.12	46.9	3.88	0	0.128	0.0072	0	0	0	0	0	0	0	5	3	1	1	5	3	1	1
MYCMS	319461	4417	4745	0	4241	4569	0	176	0	0	326.65	4.52	4.85	0	0.017	0.0173	0	0.18	0	0	0.0373	0	0.0367	73	65	102	77	70	64	96	74	262899	3248	4241	0	3098	4091	0	150	0	0	323.77	4	5.22	0	0.0153	0.0184	0	0.185
MYCPN	239753	10031	6280	0	9738	5987	0	293	0	0	348.99	14.6	9.14	0	0.0386	0.0263	0	0.426	0	0	0.0416	0	0.0442	157	92	111	75	151	89	108	72	200857	5442	4653	0	5187	4398	0	255	0	0	355.5	9.63	8.24	0	0.0256	0.016	0	0.451
MYCS2	2082061	69283	6692	96	68004	5509	0	1183	96	0	315.42	10.5	1.01	0.0145	0.0437	0.00342	3.9e-05	0.179	0.0145	0	0.0143	0.000602	0.173	1091	874	171	137	1072	864	137	108	1818452	66027	5982	96	64801	4852	0	1130	96	0	311.11	11.3	1.02	0.0164	0.0477	0.00343	4.41e-05	0.193
MYCTU	1329959	57864	4378	65	57567	4142	4	236	61	0	333.99	14.5	1.1	0.0163	0.0416	0.00337	8.41e-05	0.0593	0.0153	0	0.00553	0.00121	0.0525	788	590	111	84	785	588	102	78	1174312	54345	3952	65	54060	3728	4	224	61	0	329.31	15.2	1.11	0.0182	0.0435	0.00351	9.39e-05	0.0628
MYOLU	10579155	1726520	307395	29972	1643701	254221	300	53147	29645	0	512.31	83.6	14.9	1.45	0.132	0.0224	0.00179	2.57	1.44	0	0.033	0.00843	0.205	20439	8668	5123	2545	19635	8464	4216	2048	7089194	1322082	214305	16547	1268356	177000	126	37305	16421	0	571.06	106	17.3	1.33	0.157	0.0242	0.00146	3.01
MYRV9	7268	274	0	0	274	0	0	0	0	0	660.73	24.9	0	0	0.0484	0	0	0	0	0	0	0	NaN	2	2	0	0	2	2	0	0	7268	274	0	0	274	0	0	0	0	0	660.73	24.9	0	0	0.0484	0	0	0
MYXVL	48407	1052	32	0	1052	32	0	0	0	0	306.37	6.66	0.203	0	0.0261	0.000101	0	0	0	0	0	0	0	19	12	1	1	19	12	1	1	47898	1052	32	0	1052	32	0	0	0	0	305.08	6.7	0.204	0	0.0263	0.000102	0	0
NANEQ	151454	414	2506	0	330	2422	0	84	0	0	282.56	0.772	4.68	0	0.00468	0.0221	0	0.157	0	0	0.185	0	0.0396	8	8	57	43	6	6	54	41	151100	414	2506	0	330	2422	0	84	0	0	282.43	0.774	4.68	0	0.00469	0.0222	0	0.157
NCBVS	2537	599	0	0	599	0	0	0	0	0	1268.5	300	0	0	0.197	0	0	0	0	0	0	0	NaN	3	2	0	0	3	2	0	0
NDVB1	5000	662	69	0	662	69	0	0	0	0	625	82.8	8.62	0	0.311	0.0156	0	0	0	0	0	0	0	4	4	2	1	4	4	2	1
NECH7	7536017	1026693	69884	102	997969	41258	4	28626	98	0	479.73	65.4	4.45	0.00649	0.119	0.00833	8.56e-06	1.82	0.00624	0	0.0219	5.67e-05	0.357	11222	5836	1467	1033	10992	5786	857	651	6317695	999175	67985	102	970737	39645	4	28340	98	0	491.65	77.8	5.29	0.00794	0.14	0.00981	1.05e-05	2.21
NEIG1	555344	13157	4902	0	12345	4090	0	812	0	0	282.91	6.7	2.5	0	0.027	0.00827	0	0.414	0	0	0.0451	0	0.125	210	162	116	91	200	157	96	78	534930	12063	4618	0	11251	3806	0	812	0	0	286.21	6.45	2.47	0	0.0254	0.00806	0	0.434
NEIMB	583208	14097	5315	0	13034	4252	0	1063	0	0	291.46	7.04	2.66	0	0.0232	0.00908	0	0.531	0	0	0.0459	0	0.112	231	159	115	90	225	154	98	80	551673	12554	5246	0	11530	4222	0	1024	0	0	291.12	6.62	2.77	0	0.0229	0.00953	0	0.54
NEMVE	8260405	795584	134766	11668	753956	104165	641	30601	11027	0	338.06	32.6	5.52	0.478	0.0857	0.0142	0.0017	1.25	0.451	0	0.0395	0.0121	0.21	9377	5197	2677	1632	8901	5022	2050	1320	6292276	704336	118470	7685	669286	90595	510	27875	7175	0	392.9	44	7.4	0.48	0.103	0.0176	0.00136	1.74
NEUCR	4782371	1203792	79281	42	1172409	47939	1	31342	41	0	486.01	122	8.06	0.00427	0.22	0.0125	2.44e-05	3.19	0.00417	0	0.0204	0.000136	0.419	12426	5522	1463	943	12192	5485	836	531	4641716	1197504	78842	42	1166184	47563	1	31279	41	0	488.5	126	8.3	0.00442	0.226	0.0129	2.53e-05	3.29
NITMS	493620	10723	6295	192	9605	5369	0	926	192	0	275	5.97	3.51	0.107	0.0197	0.0123	0.000192	0.516	0.107	0	0.0803	0.00701	0.114	178	108	128	96	163	101	113	84	467872	10218	6257	192	9137	5368	0	889	192	0	276.36	6.04	3.7	0.113	0.0197	0.0129	0.000203	0.525
NODAM	1579	215	31	0	215	31	0	0	0	0	526.33	71.7	10.3	0	0.0935	0.0754	0	0	0	0	0	0	0	2	2	1	1	2	2	1	1
NOMLE	10695254	1773684	312275	24900	1696223	259446	268	52829	24632	0	541.97	89.9	15.8	1.26	0.139	0.0229	0.00129	2.68	1.25	0	0.0289	0.00583	0.204	21334	8934	5120	2548	20526	8780	4259	2057	7604878	1416949	218471	16076	1363650	181052	196	37419	15880	0	555.79	104	16	1.17	0.158	0.0221	0.0012	2.73
NPVR1	41291	1219	878	0	1219	878	0	0	0	0	277.12	8.18	5.89	0	0.0341	0.0179	0	0	0	0	0	0	0	21	18	18	12	21	18	18	12	41291	1219	878	0	1219	878	0	0	0	0	277.12	8.18	5.89	0	0.0341	0.0179	0	0
NVN68	2531	244	0	0	244	0	0	0	0	0	843.67	81.3	0	0	0.0455	0	0	0	0	0	0	0	NaN	4	1	0	0	4	1	0	0
OCSVU	1280	0	0	0	0	0	0	0	0	0	426.67	0	0	0	0	0	0	0	0	0	NaN	NaN	NaN	0	0	0	0	0	0	0	0
OLV2I	2214	46	0	0	46	0	0	0	0	0	553.5	11.5	0	0	0.0341	0	0	0	0	0	0	0	NaN	1	1	0	0	1	1	0	0
ORENI	15900418	2531725	515989	51718	2355053	390647	388	125342	51330	0	594.34	94.6	19.3	1.93	0.127	0.0265	0.00178	4.69	1.92	0	0.0476	0.00788	0.232	28935	11636	8208	4084	27218	11341	6513	3259	7493685	1382246	247040	18969	1302189	185772	180	61268	18789	0	603.31	111	19.9	1.53	0.151	0.0271	0.00155	4.93
ORNAN	9152217	1450695	265166	26991	1378503	219613	345	45546	26639	0	388.61	61.6	11.3	1.15	0.131	0.0232	0.00217	1.93	1.13	0	0.033	0.0093	0.203	17096	8328	4409	2318	16372	8118	3648	1878	6249680	1171145	180213	15077	1123329	147231	236	32975	14834	0	418.94	78.5	12.1	1.01	0.164	0.0235	0.00197	2.21
ORYLA	11965754	1528231	353542	35462	1418675	279226	222	74316	35240	0	485.78	62	14.4	1.44	0.113	0.0243	0.00157	3.02	1.43	0	0.0431	0.00786	0.193	19586	9149	5682	3088	18377	8909	4684	2536	6502981	1008523	193758	19301	948136	152530	142	41228	19159	0	516.07	80	15.4	1.53	0.139	0.0247	0.00157	3.27
ORYSJ	22210771	3392092	269661	0	3342130	219699	0	49962	0	0	351.24	53.6	4.26	0	0.188	0.00871	0	0.79	0	0	0.0115	0	0.195	46203	27649	5657	3828	45651	27498	4331	2962	9965626	1958178	108507	0	1939030	89359	0	19148	0	0	296.08	58.2	3.22	0	0.235	0.00692	0	0.569
OSHVF	51428	2690	541	0	2606	457	0	84	0	0	443.34	23.2	4.66	0	0.0472	0.00815	0	0.724	0	0	0.0513	0	0.163	46	27	12	9	44	26	11	8	50934	2690	541	0	2606	457	0	84	0	0	442.9	23.4	4.7	0	0.0476	0.00822	0	0.73
OTOGA	10768581	1696927	304224	28312	1618338	253643	304	50581	28008	0	540.32	85.1	15.3	1.42	0.13	0.0225	0.00141	2.54	1.41	0	0.0317	0.00656	0.201	20513	8536	5039	2515	19731	8372	4229	2031	7475772	1370158	218708	18398	1315664	182400	212	36308	18186	0	581.77	107	17	1.43	0.154	0.0234	0.00138	2.83
OUMVV	1358	91	0	0	91	0	0	0	0	0	452.67	30.3	0	0	0.105	0	0	0	0	0	0	0	NaN	1	1	0	0	1	1	0	0
PANTR	10627310	1776409	314858	28217	1695133	261436	363	53422	27854	0	528.01	88.3	15.6	1.4	0.14	0.0229	0.00137	2.65	1.38	0	0.0289	0.00654	0.202	21142	8907	5143	2527	20322	8757	4261	2042	7551631	1437207	226143	19464	1379288	187371	317	38772	19147	0	556.13	106	16.7	1.43	0.16	0.0226	0.00135	2.86
PAPVE	2914	319	0	0	319	0	0	0	0	0	194.27	21.3	0	0	0.109	0	0	0	0	0	0	0	NaN	6	4	0	0	6	4	0	0	2914	319	0	0	319	0	0	0	0	0	194.27	21.3	0	0	0.109	0	0	0
PARTE	18009409	997301	913565	56	908972	825292	0	88273	56	0	456.39	25.3	23.2	0.00142	0.0588	0.0465	7.54e-07	2.24	0.00142	0	0.0776	7.58e-05	0.114	15676	9953	15939	8147	14188	9358	14277	7330	8826571	488664	471269	0	441696	424301	0	46968	0	0	465.46	25.8	24.9	0	0.0563	0.046	0	2.48
PAVBP	1612	336	0	0	336	0	0	0	0	0	537.33	112	0	0	0.236	0	0	0	0	0	0	0	NaN	6	3	0	0	6	3	0	0
PBCV1	136702	7655	1222	59	7197	823	0	399	59	0	172.39	9.65	1.54	0.0744	0.0361	0.00755	0.00031	0.503	0.0744	0	0.0428	0.0075	0.229	104	69	29	23	102	68	19	17	129301	7206	1222	59	6748	823	0	399	59	0	169.69	9.46	1.6	0.0774	0.0349	0.00786	0.000323	0.524
PCV1C	542	0	0	0	0	0	0	0	0	0	271	0	0	0	0	0	0	0	0	0	NaN	NaN	NaN	0	0	0	0	0	0	0	0
PCV87	3091	0	154	0	0	154	0	0	0	0	441.57	0	22	0	0	0.0844	0	0	0	0	NaN	NaN	0	0	0	3	2	0	0	3	2
PCVC	3858	199	0	0	199	0	0	0	0	0	964.5	49.8	0	0	0.0522	0	0	0	0	0	0	0	NaN	3	2	0	0	3	2	0	0
PEDHC	5535367	767869	124981	6010	744999	108036	85	16945	5925	0	514.3	71.3	11.6	0.558	0.109	0.0183	0.000409	1.57	0.55	0	0.0252	0.00141	0.177	9598	3787	2291	1182	9387	3734	1961	973	5226574	755030	121420	4741	733981	105057	55	16363	4686	0	526.5	76.1	12.2	0.478	0.114	0.019	0.000303	1.65
PEMVW	2926	485	0	0	485	0	0	0	0	0	585.2	97	0	0	0.175	0	0	0	0	0	0	0	NaN	6	4	0	0	6	4	0	0
PHANO	6076935	1016401	79663	76	982455	45788	5	33875	71	0	379.86	63.5	4.98	0.00475	0.149	0.0093	7.12e-06	2.12	0.00444	0	0.0247	0.000165	0.395	11730	6197	1563	1045	11446	6138	885	629	5779932	1010391	79014	76	976719	45413	5	33601	71	0	379.48	66.3	5.19	0.00499	0.156	0.00968	7.47e-06	2.21
PHATC	4838670	552386	51478	25	539227	38319	25	13159	0	0	462.37	52.8	4.92	0.00239	0.0988	0.0099	5.29e-06	1.26	0	0	0.0197	0	0.257	7618	3776	1076	723	7460	3747	787	532	4278968	517439	49428	25	504632	36621	25	12807	0	0	469.44	56.8	5.42	0.00274	0.105	0.0109	6.07e-06	1.41
PHYIT	7440308	750813	157226	54	712188	118655	0	38571	54	0	422.53	42.6	8.93	0.00307	0.099	0.0174	3.38e-06	2.19	0.00307	0	0.0432	0.000132	0.241	10582	5774	3149	1795	9988	5641	2342	1377	5680129	654292	140208	54	618989	104959	0	35249	54	0	465.62	53.6	11.5	0.00443	0.116	0.0212	4.88e-06	2.89
PHYPA	12696586	1221988	207197	0	1195674	180883	0	26314	0	0	364.46	35.1	5.95	0	0.0888	0.015	0	0.755	0	0	0.0232	0	0.138	19444	11327	4602	3204	18843	11092	3734	2563	6713683	742160	85516	0	730549	73905	0	11611	0	0	368.24	40.7	4.69	0	0.0992	0.00877	0	0.637
PIG	11789359	1962802	343655	29609	1873196	283304	347	60345	29256	1	452.24	75.3	13.2	1.14	0.133	0.0225	0.00156	2.31	1.12	3.84e-05	0.0318	0.00713	0.202	22973	10168	5631	2880	22067	9945	4641	2329	6886409	1329666	204111	17134	1276373	167824	121	36281	17007	1	500.54	96.6	14.8	1.25	0.16	0.0239	0.00157	2.64
PLABA	2837789	226115	38726	0	220360	32971	0	5755	0	0	243.46	19.4	3.32	0	0.0516	0.00888	0	0.494	0	0	0.0245	0	0.156	3367	1909	804	536	3304	1876	685	443	2520605	200340	32635	0	195723	28018	0	4617	0	0	251.68	20	3.26	0	0.0487	0.00797	0	0.461
PLACH	2835222	279179	33062	0	273771	27654	0	5408	0	0	194.01	19.1	2.26	0	0.0647	0.00805	0	0.37	0	0	0.0224	0	0.204	3907	2484	749	567	3840	2446	605	442	2416307	243712	28983	0	238957	24228	0	4755	0	0	202.25	20.4	2.43	0	0.0634	0.00783	0	0.398
PLAF7	4074762	631551	58208	131	618972	45760	0	12448	131	0	765.21	119	10.9	0.0246	0.106	0.0141	1.71e-05	2.34	0.0246	0	0.0232	0.000257	0.266	7920	2400	1233	721	7838	2376	926	534	3826129	602601	56134	131	590318	43982	0	12152	131	0	779.25	123	11.4	0.0267	0.111	0.0148	1.85e-05	2.47
PLAKH	3704850	671108	53290	245	660690	43025	92	10265	153	0	726.44	132	10.4	0.048	0.135	0.0146	3.38e-05	2.01	0.03	0	0.0148	0.00028	0.236	8345	2633	1093	629	8249	2617	863	482	3537186	660307	51661	245	650395	41902	92	9759	153	0	735.53	137	10.7	0.0509	0.138	0.0149	3.58e-05	2.03
PLAVS	3748164	863401	64712	463	843510	45233	51	19479	412	0	695.52	160	12	0.0859	0.166	0.0162	9.35e-05	3.61	0.0765	0	0.0211	0.000492	0.285	9670	2958	1249	669	9564	2935	893	487	3638461	847026	61667	380	828909	43879	51	17788	329	0	717.65	167	12.2	0.075	0.169	0.0164	8.5e-05	3.51
PLAYO	3387422	407437	47268	946	397225	37777	225	9491	721	0	436.69	52.5	6.09	0.122	0.0782	0.00952	0.000222	1.22	0.0929	0	0.0204	0.00269	0.233	5440	2277	1004	603	5359	2252	792	458	2974340	390533	41356	946	380550	32094	225	9262	721	0	480.66	63.1	6.68	0.153	0.0908	0.0106	0.000278	1.5
PLRV1	3639	867	0	0	867	0	0	0	0	0	404.33	96.3	0	0	0.207	0	0	0	0	0	0	0	NaN	11	6	0	0	11	6	0	0
PMTVS	3653	194	0	0	194	0	0	0	0	0	521.86	27.7	0	0	0.0449	0	0	0	0	0	0	0	NaN	3	2	0	0	3	2	0	0
PMVK	1498	109	0	0	109	0	0	0	0	0	299.6	21.8	0	0	0.191	0	0	0	0	0	0	0	NaN	2	2	0	0	2	2	0	0
PNLV	2331	259	0	0	259	0	0	0	0	0	582.75	64.8	0	0	0.0798	0	0	0	0	0	0	0	NaN	5	2	0	0	5	2	0	0
POL1M	2209	33	0	0	33	0	0	0	0	0	2209	33	0	0	0.0149	0	0	0	0	0	0	0	NaN	1	1	0	0	1	1	0	0
[truncated: 154 more rows]
[truncated: 13 more columns]

## Sheet: Consensus
ORG	ALLRES	IDP_RES	CC_RES	CLG_RES	PURE_IDP_RES	PURE_CC_RES	PURE_CLG_RES	CC_IDP	CLG_IDP	CC_CLG	RES_PERSEQ	IDP_PERSEQ	CC_PERSEQ	CLG_PERSEQ	IDP_PER_LEN_PERSEQ	CC_PER_LEN_PERSEQ	CLG_PER_LEN_PERSEQ	CC_IDP_PERSEQ	CLG_IDP_PERSEQ	CLG_CC_PERSEQ	CCIDP_PER_IDP_PERSEQ	CLGIDP_PER_IDP_PERSEQ	CCIDP_PER_CC_PERSEQ	IDP_SEG	IDP_SEGSQ	CC_SEG	CC_SEGSQ	PURE_IDP_SEG	PURE_IDP_SEGSQ	PURE_CC_SEG	PURE_CC_SEGSQ	ALLRES_40	IDP_RES_40	CC_RES_40	CLG_RES_40	PURE_IDP_RES_40	PURE_CC_RES_40	PURE_CLG_RES_40	CC_IDP_40	CLG_IDP_40	CC_CLG_40	RES_PERSEQ_40	IDP_PERSEQ_40	CC_PERSEQ_40	CLG_PERSEQ_40	IDP_PER_LEN_PERSEQ_40	CC_PER_LEN_PERSEQ_40	CLG_PER_LEN_PERSEQ_40	CC_IDP_PERSEQ_40
[truncated: 519 more rows]
[truncated: 13 more columns]
